# Supplementary material for: Serum metabolite profiles of thyroid autoimmunity patients in early pregnancy
Source: PeerJ journal article supplement (doi:10.7717/peerj.18534), 2024-11-19
Supplement: Raw_data.zip [file Raw data.xlsx]

## Sheet: TAI vs. HC_pos
Compound_ID	Name	Formula	Molecular Weight	RT [min]	m/z	mzCloud_Results	mzVault_Results	MassList_Results	pos_TAI_1	pos_TAI_2	pos_TAI_3	pos_TAI_4	pos_TAI_5	pos_TAI_6	pos_TAI_7	pos_TAI_8	pos_TAI_9	pos_TAI_10	pos_TAI_11	pos_TAI_12	pos_TAI_13	pos_TAI_14	pos_TAI_15	pos_TAI_16	pos_TAI_17	pos_TAI_18	pos_TAI_19	pos_TAI_20	pos_TAI_21	pos_TAI_22	pos_TAI_23	pos_TAI_24	pos_TAI_25	pos_TAI_26	pos_HC_1	pos_HC_2	pos_HC_3	pos_HC_4	pos_HC_5	pos_HC_6	pos_HC_7	pos_HC_8	pos_HC_9	pos_HC_10	pos_HC_11	pos_HC_12	pos_HC_13	pos_HC_14	pos_HC_15
Com_1009_pos	D-Lactose monohydrate	C12 H22 O11	342.117	1.352	343.125	Full match	Full match	Full match	7.24958e+07	4.38043e+07	1.97011e+07	1.75739e+07	1.81778e+07	1.37633e+07	1.331e+07	1.67787e+07	1.78957e+07	1.60569e+07	3.08054e+07	3.48723e+07	2.58199e+07	3.16647e+07	1.89276e+07	9.12774e+06	1.35715e+07	1.69989e+07	2.70108e+07	3.52595e+07	2.94029e+07	1.88912e+07	8.45762e+06	1.92851e+07	1.64407e+07	1.81646e+07	4.88136e+07	5.82932e+07	3.92194e+07	338864786	7.14023e+07	3.6182e+07	2.5071e+07	2.04164e+07	2.09698e+07	1.91904e+07	2.21599e+07	2.36964e+07	2.17178e+07	2.13175e+07	2.87719e+07
Com_10114_pos	L-Cysteine-glutathione gisulfide	C13 H22 N4 O8 S2	426.089	1.313	427.097	No results	No results	Full match	832045	1.11105e+06	1.82806e+06	836739	462783	614902	522838	672762	509754	917706	658173	1.09335e+06	966067	691310	779105	1.00636e+06	642149	756013	1.00871e+06	861873	627513	737401	704119	966081	6.35478e+06	737094	940691	945203	1.03814e+06	731859	957658	778302	797508	704384	760464	669844	589104	617783	881959	682424	566847
Com_10232_pos	PC (18:3e/22:6)	C48 H80 N O7 P	813.559	16.554	814.567	No results	Invalid mass	No results	3.40046e+06	2.65433e+06	3.89626e+06	3.10953e+06	1.58094e+06	2.31765e+06	1.2098e+06	1.96544e+06	458129	3.11441e+06	3.6168e+06	2.93235e+06	2.28396e+06	3.66174e+06	2.56021e+06	1.44763e+06	2.80854e+06	2.4553e+06	3.12043e+06	2.81724e+06	2.33813e+06	3.21746e+06	1.87144e+06	3.24123e+06	3.89436e+06	3.39817e+06	2.99113e+06	5.8266e+06	4.04926e+06	2.36505e+06	4.87873e+06	3.01011e+06	2.85927e+06	4.47005e+06	3.28783e+06	2.74319e+06	956144	2.80826e+06	2.2962e+06	3.08442e+06	1.44744e+06
Com_1027_pos	PC (18:0/18:1)	C44 H86 N O8 P	787.608	15.761	788.615	No results	Full match	No results	222432646	2.09472e+08	2.5496e+08	1.98497e+08	1.46437e+08	1.5704e+08	165514163	2.25511e+08	2.19182e+08	1.97881e+08	2.59916e+08	2.03557e+08	199639104	1.96502e+08	2.08367e+08	1.8101e+08	1.85912e+08	2.72322e+08	2.02707e+08	2.17472e+08	1.6678e+08	2.6729e+08	1.68187e+08	2.83999e+08	2.88649e+08	283730794	3.30197e+08	3.02071e+08	366244310	178684478	2.46153e+08	3.54263e+08	251912177	2.093e+08	2.47475e+08	1.7949e+08	116793993	2.01029e+08	2.9545e+08	2.06867e+08	1.57477e+08
Com_10281_pos	beta-Estradiol 17-Acetate	C20 H26 O3	314.189	12.283	315.196	No results	No results	Full match	748251	619398	616712	754033	3.76532e+06	3.02832e+06	3.08589e+06	591643	2.49071e+06	633529	1.04523e+06	1.04738e+06	634282	929634	719440	3.32827e+06	1.96296e+06	1.11446e+06	1.05923e+06	514633	572367	568086	1.17206e+06	1.53534e+06	1.91086e+06	911181	1.02095e+06	1.01479e+06	1.15644e+06	891280	1.00563e+06	1.12285e+06	898105	1.25769e+06	835231	4.13131e+06	4.16962e+06	1.91582e+06	1.22933e+06	3.26095e+06	2.8755e+06
Com_1029_pos	PC (18:2/19:2)	C45 H82 N O8 P	795.577	15.182	796.584	No results	Full match	No results	1.32263e+08	1.95832e+08	2.21286e+08	1.4256e+08	9.99221e+07	2.04197e+08	1.35e+08	249416125	1.31993e+08	3.37828e+08	200234411	215935551	232906063	225676009	1.94242e+08	9.14616e+07	8.98961e+07	1.3602e+08	1.78505e+08	2.9634e+08	1.30182e+08	1.79059e+08	1.08322e+08	1.39329e+08	2.76522e+08	1.58835e+08	2.59734e+08	2.36874e+08	2.55789e+08	2.35647e+08	2.61005e+08	2.11949e+08	2.39649e+08	1.71599e+08	2.13605e+08	1.32856e+08	7.39088e+07	192049548	2.01918e+08	2.12621e+08	1.21073e+08
Com_10331_pos	Cnidioside A	C17 H20 O9	408.106	1.35	409.114	Invalid mass	No results	No results	2.69038e+06	3.6398e+06	4.04294e+06	3.07162e+06	3.24458e+06	3.27709e+06	2.34339e+06	3.63145e+06	2.59676e+06	2.68802e+06	3.60436e+06	4.19269e+06	5.89882e+06	4.05988e+06	4.1908e+06	3.65862e+06	5.05846e+06	4.11962e+06	4.16542e+06	3.35568e+06	3.58337e+06	3.84205e+06	661850	5.98017e+06	3.98457e+06	4.91655e+06	1.39616e+06	1.48621e+06	2.55816e+06	914698	1.29151e+06	2.46587e+06	2.80274e+06	3.78222e+06	2.47008e+06	2.12352e+06	2.39874e+06	2.43932e+06	3.6448e+06	2.82303e+06	3.05187e+06
Com_1037_pos	Deoxycorticosterone 21-glucoside	C27 H40 O8	492.271	13.715	493.278	Full match	No results	No results	4.01184e+06	3.90164e+06	3.89575e+06	3.8001e+06	7.55172e+07	4.62233e+07	1.03275e+07	4.08999e+06	1.03637e+08	4.05579e+06	3.75604e+06	3.91071e+06	4.16424e+06	3.74757e+06	1.41451e+07	1.07702e+08	1.6208e+08	3.80519e+06	4.0704e+06	3.26359e+06	3.72467e+06	3.56021e+06	3.67605e+07	3.99061e+06	1.3023e+08	3.74369e+06	5.45819e+06	6.02701e+06	6.0665e+06	5.10266e+06	5.28414e+06	5.13312e+06	5.27352e+06	2.08497e+07	4.59568e+06	3.12836e+07	1.60578e+08	5.02315e+07	8.74653e+07	5.83769e+07	1.00896e+08
Com_1049_pos	ACar 18:1	C25 H48 N O4	425.351	13.485	426.358	No results	Invalid mass	No results	3.14528e+08	1.98301e+08	1.12452e+08	1.4268e+08	8.19774e+07	8.48794e+07	7.13676e+07	1.69008e+08	1.04398e+08	1.77082e+08	1.56222e+08	2.30471e+08	2.53906e+08	1.54804e+08	7.88896e+07	9.97573e+07	6.62401e+07	1.71404e+08	1.13885e+08	127953864	1.16242e+08	1.38171e+08	1.00036e+07	1.50173e+08	1.68649e+08	8.61102e+07	9.32798e+07	9.34856e+07	9.79488e+07	9.67702e+07	9.89797e+07	9.80136e+07	1.23107e+08	9.40432e+07	1.19738e+08	9.83033e+07	1.09084e+08	1.03138e+08	1.19414e+08	8.94807e+07	6.56717e+07
Com_1051_pos	N-Acetylvaline	C7 H13 N O3	159.09	5.69	160.097	No results	No results	Full match	2.50442e+07	2.54339e+07	2.63158e+07	2.70703e+07	1.89467e+07	1.7404e+07	1.87432e+07	2.14996e+07	1.85081e+07	2.66679e+07	2.43547e+07	2.46026e+07	2.81596e+07	2.23899e+07	2.34268e+07	1.56749e+07	2.18117e+07	2.43089e+07	2.51347e+07	1.91387e+07	2.16572e+07	2.19012e+07	1.92697e+08	2.6432e+07	2.37491e+07	2.08082e+07	3.9377e+07	4.36891e+07	3.97999e+07	3.15105e+07	3.44057e+07	3.35468e+07	3.50081e+07	3.28575e+07	3.31712e+07	2.04479e+07	2.08115e+07	3.10851e+07	3.05281e+07	2.34572e+07	2.44119e+07
Com_10565_pos	SM (d24:2/18:0)	C47 H93 N2 O6 P	812.68	13.307	813.687	No results	Full match	No results	1.56496e+06	701358	774263	939006	1.02092e+06	1.31632e+06	1.10509e+06	1.4734e+06	726582	990422	1.27407e+06	1.29371e+06	1.12801e+06	1.77064e+06	939520	473099	544079	979626	1.34576e+06	1.15621e+06	1.57641e+06	928624	310847	991661	908418	1.25565e+06	841813	1.49207e+06	3.93208e+06	1.2328e+06	1.32807e+06	3.36042e+06	1.52048e+06	1.51308e+06	1.55919e+06	820851	1.19855e+06	4.35397e+06	1.28215e+06	943893	1.6505e+06
Com_106_pos	Palmitoyl sphingomyelin	C39 H79 N2 O6 P	702.568	16.241	703.576	Full match	Full match	No results	5613360931	6647740738	6078970370	4106750341	3487499041	4739269330	4350628651	3970678457	4565996008	4451087003	5003255155	3448086276	4757451310	5060794763	3097565433	3500030716	3263258298	3654848172	5578449904	2770478283	4662770506	4640572265	2877546830	6358601734	5390518615	4632056307	7253104962	4985498063	5159558732	5650614445	8268593497	3420864107	7233922502	3967853609	6253756773	3316519103	4717669997	4821712582	8122161846	5229963488	4631235809
Com_10701_pos	PC (16:0e/16:0)	C40 H82 N O7 P	719.581	15.771	720.589	No results	Full match	No results	2.42995e+06	1.60814e+06	1.34334e+06	2.15047e+06	1.08225e+06	2.22393e+06	1.43483e+06	1.93724e+06	1.8152e+06	2.32824e+06	1.93691e+06	2.55391e+06	3.2686e+06	1.1351e+06	2.86872e+06	1.73939e+06	2.84396e+06	2.20466e+06	2.38866e+06	1.89688e+06	1.12085e+06	2.01269e+06	1.22312e+06	2.05925e+06	5.56206e+06	2.68899e+06	1.17765e+06	1.15988e+06	1.05457e+06	1.29578e+06	688759	608963	2.06246e+06	1.02668e+06	1.20251e+06	867316	1.15877e+06	550679	1.09583e+06	1.2635e+06	1.35201e+06
Com_10715_pos	PC (16:2e/16:0)	C40 H78 N O7 P	715.552	15.507	716.559	No results	Full match	No results	1.53162e+06	2.07638e+06	2.49937e+06	2.74135e+06	1.86012e+06	1.58077e+06	1.3494e+06	2.56236e+06	1.87183e+06	1.57545e+06	1.5448e+06	1.38699e+06	1.82829e+06	3.21092e+06	1.49606e+06	1.354e+06	1.37945e+06	2.78591e+06	3.14831e+06	1.25913e+06	889631	1.87302e+06	1.3886e+06	2.84689e+06	5.55268e+06	1.57653e+06	1.11084e+06	1.26834e+06	1.08879e+06	939250	1.04622e+06	1.01493e+06	1.04313e+06	1.00511e+06	1.42492e+06	682006	918597	1.57428e+06	1.12321e+06	805664	1.04508e+06
Com_10740_pos	PC (18:5e/22:6)	C48 H76 N O7 P	809.521	15.745	810.529	No results	Invalid mass	No results	655882	659823	702170	622947	421170	423206	3.96213e+06	620866	510575	744434	678667	674830	679930	661662	627383	409568	557271	648474	702396	605790	648839	645355	389084	694004	644586	611103	754148	917846	994270	793346	855354	810815	742660	737444	737463	546045	529521	786426	688573	575403	551752
Com_1074_pos	Tropolone	C7 H6 O2	122.037	2.092	123.044	No results	No results	Full match	1.89666e+08	1.43233e+08	1.46049e+08	1.39346e+08	1.14461e+08	9.94172e+07	1.13758e+08	1.72187e+08	1.74065e+08	1.53738e+08	1.68421e+08	1.70461e+08	1.20926e+08	1.77079e+08	1.4804e+08	1.10388e+08	1.4189e+08	1.97017e+08	1.74287e+08	1.79219e+08	1.6509e+08	1.71385e+08	1.83904e+08	2.23233e+08	104875431	1.32035e+08	1.61985e+08	1.79303e+08	1.8281e+08	1.58301e+08	1.90686e+08	2.02666e+08	1.27821e+08	170083208	1.76881e+08	1.26014e+08	137713785	1.72384e+08	192409484	1.44708e+08	1.59149e+08
Com_1078_pos	7-methyl-3-nitroimidazo[1,2-a]pyridine	C8 H7 N3 O2	199.034	1.15	200.041	Invalid mass	No results	No results	191748189	1.39397e+08	1.47203e+08	176053480	1.09756e+08	1.10916e+08	1.28887e+08	1.47988e+08	1.3016e+08	1.91961e+08	1.7476e+08	1.4852e+08	1.73637e+08	1.77121e+08	1.68999e+08	1.25285e+08	1.27071e+08	1.56775e+08	1.58498e+08	149900589	1.40972e+08	1.60332e+08	1.81751e+08	1.70087e+08	1.55361e+08	1.36405e+08	1.41425e+08	1.57178e+08	1.80028e+08	1.48421e+08	1.68586e+08	156261830	1.26439e+08	1.50418e+08	1.59418e+08	9.2793e+07	9.79858e+07	1.66043e+08	1.40261e+08	1.32423e+08	1.63447e+08
Com_1092_pos	D-(+)-Maltose	C12 H22 O11	364.099	1.348	365.106	Invalid mass	No results	No results	6.63828e+07	4.00958e+07	1.916e+07	1.43112e+07	2.74496e+07	1.08518e+07	1.76427e+07	1.29309e+07	2.40846e+07	2.01039e+07	2.81329e+07	3.02511e+07	2.06105e+07	2.67105e+07	1.60692e+07	6.8708e+06	1.50867e+07	1.33425e+07	2.2355e+07	5.52906e+07	2.5062e+07	1.46731e+07	1.16351e+07	1.46052e+07	1.25169e+07	1.34646e+07	4.27434e+07	5.0964e+07	3.33325e+07	2.97535e+08	6.28406e+07	3.12161e+07	2.15898e+07	1.54743e+07	1.47022e+07	1.55114e+07	1.95161e+07	1.96997e+07	1.75993e+07	1.72623e+07	2.51225e+07
Com_109_pos	TKK	C16 H33 N5 O5	375.253	11.825	376.26	Invalid mass	No results	No results	1217505405	1498332924	1333718813	7059367146	8.55729e+08	2087910954	2879069555	1935880709	1343183609	2659631708	2373573134	1126919723	1751053196	1128590147	1435070193	1451494007	1127625011	7109029443	4565692620	2040865734	2440491891	1310340705	2264941724	3598605910	3709029941	2243471065	2893016621	2250739805	5592618064	1814753595	1324698242	2563784214	1047904440	2579914965	3035998596	2743374819	2559388714	2444421034	2459054272	1425941653	2692972425
Com_11209_pos	Limonin	C26 H30 O8	470.193	5.688	471.2	Full match	No results	No results	2.56145e+06	3.46967e+06	2.70974e+06	1.42359e+06	1.41106e+06	1.06761e+06	2.78464e+06	2.00042e+06	2.05944e+06	1.50863e+06	2.43834e+06	1.00087e+06	1.46167e+06	3.96494e+06	4.3914e+06	2.06671e+06	742579	1.2959e+06	3.26863e+06	2.7413e+06	3.59985e+06	1.11825e+06	193525	1.40789e+06	1.35273e+06	1.27421e+06	391947	2.66838e+06	2.06234e+06	4.61255e+06	1.33799e+06	1.45023e+06	1.3903e+06	1.02495e+06	1.46131e+06	2.23159e+06	2.50143e+06	894014	1.58653e+06	1.06055e+06	1.01435e+06
Com_1122_pos	ACar 18:2	C25 H46 N O4	423.336	13.247	424.343	No results	Invalid mass	No results	2.78146e+08	2.30669e+08	9.15143e+07	2.38302e+08	7.99758e+07	7.06687e+07	7.71186e+07	1.67501e+08	1.14324e+08	1.27194e+08	1.82437e+08	1.81747e+08	2.38819e+08	1.79087e+08	8.30497e+07	101282587	5.62236e+07	1.81315e+08	1.21275e+08	1.12931e+08	1.29069e+08	1.44658e+08	3.53615e+06	1.22934e+08	1.39646e+08	9.64735e+07	1.0481e+08	8.87128e+07	6.88953e+07	1.83921e+08	9.73881e+07	1.05398e+08	1.10807e+08	6.9762e+07	1.64442e+08	105857722	137464569	1.00755e+08	1.44431e+08	7.80066e+07	7.15888e+07
Com_1128_pos	3-methyl-5-oxo-5-(4-toluidino)pentanoic acid	C13 H17 N O3	257.103	1.346	258.111	Invalid mass	No match	No match	2.04213e+08	5.21577e+07	1.07067e+08	1.11592e+08	3.49888e+07	5.27145e+07	2.67381e+07	7.78778e+07	4.43416e+07	154425008	1.14595e+08	2.84433e+07	3.06875e+07	1.09564e+08	9.05546e+07	5.02739e+07	6.80805e+07	1.49045e+08	1.02577e+08	1.0842e+08	5.23285e+07	2.55519e+08	1.3965e+07	6.35503e+07	3.5931e+07	8.31571e+07	6.67116e+07	8.63582e+07	7.41131e+07	7.57104e+07	6.20006e+07	1.02628e+08	5.68397e+07	7.70316e+07	1.00645e+08	29271906	6.94546e+07	6.28802e+07	3.46442e+07	4.96487e+07	9.88399e+07
Com_112_pos	PC (14:1e/4:0)	C26 H52 N O7 P	521.349	14.871	522.356	No results	Full match	Full match	2867769106	5184646466	3052840007	5645966564	2591533173	1875368365	2004654329	2737352191	2652467597	3234737125	3823232414	4758063678	3989630001	3415152618	2776800277	3822811365	2987697921	3031171385	3586923017	5763984236	4986919232	6223134836	4.44381e+08	3287065002	2766461268	4778196263	3564901145	4259950852	3604581500	4682789847	2833822930	4066525397	2733510208	2902624818	2995190617	2545539066	3398970771	1948399517	1822854481	2398120890	2631360629
Com_11318_pos	N1-{[5-(2,4-difluorophenyl)-2-furyl]methyl}benzene-1-sulfonamide	C17 H13 F2 N O3 S	389.054	6.606	372.051	Invalid mass	No results	No results	748911	790232	756021	763511	505960	497772	530002	726084	596537	824231	780073	837922	893231	771340	691054	536298	680962	789165	771561	714122	717884	776563	2.83115e+06	834217	721183	707885	939817	956883	1.01445e+06	841318	877490	851246	846905	879414	804948	538428	529494	823277	780213	686602	673858
Com_1138_pos	SM (d14:0/24:1)	C43 H87 N2 O6 P	758.628	16.415	759.635	No results	Full match	No results	8.81849e+07	1.38858e+08	1.38154e+08	1.60404e+08	1.21456e+08	8.73073e+07	9.99744e+07	1.92412e+08	1.80946e+08	1.24891e+08	2.34167e+08	2.96464e+08	1.98551e+08	1.00688e+08	1.30791e+08	1.44978e+08	1.35315e+08	1.71325e+08	1.44683e+08	138886034	7.7492e+07	2.2115e+08	9.3443e+07	1.80514e+08	1.54433e+08	1.73416e+08	1.23421e+08	1.79207e+08	2.13379e+08	9.47261e+07	1.19239e+08	2.25518e+08	1.27913e+08	2.03673e+08	1.22401e+08	8.33178e+07	7.43219e+07	9.252e+07	1.17629e+08	1.05464e+08	1.51599e+08
Com_1159_pos	LPC 15:0	C23 H48 N O7 P	481.318	14.491	482.325	No results	Full match	Full match	4.4966e+07	8.0684e+07	6.38607e+07	2.5264e+08	1.21035e+08	1.12518e+08	5.55235e+07	1.33417e+08	2.0356e+08	7.97443e+07	178648275	1.82682e+08	1.21608e+08	6.4217e+07	6.10297e+07	1.36989e+08	131434091	1.58641e+08	9.68952e+07	2.25877e+08	1.47923e+08	1.28975e+08	1.10045e+07	1.14234e+08	9.38233e+07	9.1178e+07	150894582	9.06423e+07	1.64726e+08	1.79181e+08	1.14063e+08	1.48876e+08	1.57683e+08	1.09328e+08	9.63817e+07	8.91503e+07	1.20963e+08	5.56176e+07	4.21592e+07	5.5314e+07	5.18558e+07
Com_1160_pos	Biliverdin	C33 H34 N4 O6	582.249	11.792	583.257	No results	Full match	No results	9.24361e+07	7.55437e+07	179541313	152364307	3.15234e+07	4.64937e+07	3.16699e+07	2.23136e+08	2.03175e+08	5.88226e+07	4.95307e+07	1.55291e+08	1.75103e+08	8.92296e+07	4.12867e+07	7.95676e+07	6.65657e+07	5.73283e+07	8.67916e+07	1.22576e+08	1.65201e+08	1.04785e+08	2.85683e+07	2.7072e+08	1.13621e+08	3.70714e+07	6.94585e+07	7.69322e+07	7.26746e+07	1.5915e+08	1.35408e+08	2.74149e+07	1.02e+08	6.7889e+07	108178454	3.10561e+07	6.0764e+07	6.89333e+07	5.49995e+07	8.89047e+07	2.53125e+07
Com_1161_pos	(12Z)-9,10,11-trihydroxyoctadec-12-enoic acid	C18 H34 O5	352.223	13.552	353.231	Invalid mass	No results	No match	5.28389e+06	6.73312e+06	5.99429e+06	7.53838e+06	1.10474e+08	9.36818e+07	1.162e+08	6.60791e+06	9.23578e+07	6.6418e+06	8.44637e+06	6.86393e+06	5.46927e+06	7.41887e+06	2.32591e+07	8.28204e+07	6.02834e+07	6.16589e+06	6.29456e+06	5.22133e+06	7.83e+06	7.22187e+06	1.60192e+08	8.10546e+06	2.53684e+07	2.01643e+07	6.84718e+06	6.40044e+06	6.58073e+06	5.87615e+06	8.43948e+06	6.8263e+06	6.76309e+06	1.42037e+07	6.56945e+06	8.05422e+07	8.68875e+07	2.75087e+07	1.25033e+07	6.90363e+07	5.30979e+07
Com_1197_pos	PC (14:0e/24:4)	C46 H86 N O7 P	795.612	15.609	796.62	No results	Full match	No results	1.65343e+08	7.39623e+07	1.03157e+08	9.43713e+07	5.02117e+07	7.63034e+07	7.90457e+07	8.5055e+07	6.2102e+07	7.0095e+07	9.10764e+07	118287263	1.30035e+08	7.20749e+07	8.34184e+07	5.19172e+07	7.33646e+07	7.94323e+07	102342167	8.27175e+07	6.90714e+07	7.41423e+07	5.2896e+07	8.7726e+07	1.15694e+08	9.69922e+07	1.25675e+08	3.07619e+08	1.28529e+08	1.09255e+08	8.47058e+07	1.3379e+08	1.27787e+08	9.47569e+07	9.92136e+07	6.65817e+07	6.64398e+07	7.319e+07	1.29618e+08	6.9638e+07	1.24195e+08
Com_120_pos	Methyl indole-3-acetate	C11 H11 N O2	189.079	10.185	190.087	Full match	Full match	Full match	4.22829e+08	1.74015e+07	3.74964e+08	1.70643e+08	7.26223e+07	131333453	2.77449e+08	3.38022e+08	7.97994e+07	4.48736e+07	1.19113e+08	1.78582e+08	9.60434e+07	3.47031e+08	2.59588e+08	3.60443e+07	3.15481e+08	5.49629e+08	1.41984e+08	5.29403e+07	8.16226e+07	1.17051e+08	2.98593e+07	6.68046e+07	1.64768e+08	8.35232e+07	1.98024e+08	1.37357e+07	4.47953e+08	2.11105e+08	1.66116e+08	5.32314e+08	6.37827e+08	9.0861e+07	6763562249	2.43625e+07	1.36639e+08	4.41992e+07	8.73582e+07	8.48273e+07	1.3001e+07
Com_1215_pos	Hexanoylcarnitine	C13 H25 N O4	259.179	8.488	260.186	Full match	Not the top hit	No results	3.76331e+07	2.90749e+07	2.42959e+07	1.55256e+07	2.48898e+07	1.54003e+07	6.96315e+06	3.1657e+07	2.10084e+07	4.07171e+07	1.82478e+07	7.30596e+07	7.1119e+07	3.54379e+07	9.27499e+06	1.07331e+07	1.1399e+07	2.57078e+08	1.62546e+07	2.12117e+07	1.93795e+07	12669703	2.11002e+07	3.82259e+07	2.68366e+07	1.92481e+07	2.40138e+07	1.93285e+07	2.69716e+07	3.61367e+07	2.33666e+07	1.95304e+07	4.56103e+07	2.4158e+07	2.30423e+07	1.26685e+07	2.91936e+07	3.8823e+07	6.212e+07	2.76853e+07	1.65351e+07
Com_12167_pos	Cortisone	C21 H28 O5	360.194	10.706	361.201	Full match	No results	No results	2.44971e+06	2.20353e+06	2.55804e+06	1.91784e+06	2.52152e+06	1.60666e+06	1.67793e+06	2.49496e+06	2.02786e+06	2.14034e+06	1.1607e+06	2.15674e+06	2.25178e+06	2.61745e+06	1.46547e+06	1.42162e+06	2.37773e+06	2.03397e+06	1.80449e+06	1.79959e+06	1.54312e+06	1.52837e+06	1.58804e+06	2.17046e+06	1.69603e+06	1.69641e+06	1.45783e+06	2.54143e+06	4.86253e+06	2.07804e+06	2.63168e+06	2.37915e+06	2.73307e+06	3.06568e+06	2.86955e+06	1.15538e+06	1.13191e+06	1.91655e+06	2.2474e+06	2.10877e+06	2.34136e+06
Com_1220_pos	Bicyclo Prostaglandin E2	C20 H30 O4	356.197	12.859	357.205	Invalid mass	No results	No results	1.12426e+07	1.19806e+07	1.00614e+07	2.17543e+07	5.90546e+06	5.78111e+06	8.46775e+06	9.2929e+06	7.6062e+06	1.15151e+07	1.25278e+07	1.28848e+07	1.10539e+07	7.81265e+06	9.48408e+06	9.46573e+06	7.50302e+06	1.19392e+07	1.38084e+07	1.07933e+07	1.03735e+07	1.39855e+07	153241715	1.08494e+07	1.20551e+07	9.50779e+06	1.48099e+07	1.55311e+07	1.56069e+07	1.18013e+07	1.32423e+07	1.28745e+07	1.26814e+07	1.14704e+07	1.06743e+07	7.69499e+06	7.51049e+06	9.14517e+06	1.022e+07	9.86477e+06	8.52145e+06
Com_1222_pos	Theobromine	C7 H8 N4 O2	180.065	6.109	181.072	Full match	No results	No results	3.34829e+06	1.97528e+08	8.82796e+07	3.39169e+06	2.21228e+06	5.03846e+06	2.84326e+07	3.228e+06	2.04864e+06	3.17225e+06	6.87476e+06	3.54646e+06	1.43649e+07	2.80917e+06	4.68837e+06	1.01806e+07	3.20372e+06	4.01288e+06	1.01669e+07	5.03167e+06	2.66039e+06	6.8486e+06	6.6335e+07	1.98447e+07	2.59011e+07	1.17928e+08	909468	4.07885e+06	5.11445e+07	3.98137e+06	4.10537e+06	3.42445e+06	233063903	3.55663e+06	3.14809e+06	1.09946e+07	3.39928e+06	3.24142e+06	3.07498e+06	2.47324e+06	3.59622e+06
Com_12241_pos	N1-(1,3-thiazol-2-yl)-2-chlorobenzamide	C10 H7 Cl N2 O S	237.997	1.286	239.004	Full match	No results	No results	1.0651e+06	1.00747e+06	1.28254e+06	1.0803e+06	1.26411e+06	803879	845866	1.11886e+06	1.55672e+06	1.29252e+06	1.22932e+06	1.47965e+06	1.65176e+06	1.30515e+06	1.3966e+06	810799	1.42977e+06	831480	2.29053e+06	1.68762e+06	1.01142e+06	2.68233e+06	499208	1.54347e+06	1.67209e+06	1.09499e+06	957984	1.63019e+06	1.15539e+06	766337	995419	3.48648e+06	1.0575e+06	3.75348e+06	1.44979e+06	677369	874688	967744	1.55474e+06	1.43999e+06	1.22117e+06
Com_1224_pos	2-Arachidonyl Glycerol ether	C23 H40 O3	342.314	15.499	365.303	Invalid mass	No results	No results	6.05577e+06	4.94949e+06	8.04178e+06	5.14786e+06	30400068	2.62263e+07	19384321	5.81268e+06	1.53126e+07	7.10346e+06	5.52135e+06	5.07728e+06	7.16785e+06	4.84235e+06	7.56854e+06	1.88428e+07	1.33054e+07	6.38644e+06	4.92997e+06	5.55956e+06	4.75174e+06	4.82067e+06	152426609	3.88655e+06	7.16935e+06	6.9978e+06	5.8386e+06	5.54426e+06	6.75551e+06	6.51147e+06	5.75374e+06	5.72745e+06	6.38608e+06	6.4869e+06	6.04097e+06	1.53756e+07	1.73149e+07	8.02594e+06	6.71601e+06	1.42018e+07	1.42282e+07
Com_12299_pos	3-[(4-chlorophenyl)thio]-1-phenylprop-2-en-1-one	C15 H11 Cl O S	295.999	1.72	297.006	Invalid mass	No results	No results	1.9206e+06	1.23626e+06	666983	1.21276e+06	650595	395466	381911	1.59985e+06	1.48511e+06	954877	2.04457e+06	996069	1.06142e+06	1.33364e+06	832358	722440	451987	789930	726166	826666	919174	764338	2.26649e+06	970632	303326	548365	634988	1.63337e+06	470819	1.49612e+06	1.35127e+06	1.78795e+06	907829	1.18826e+06	2.06544e+06	858084	753637	890363	1.46036e+06	575458	871167
Com_1229_pos	4-(2,3-dihydro-1,4-benzodioxin-6-yl)butanoic acid	C12 H14 O4	244.072	11.525	245.079	Invalid mass	No results	No results	9.71944e+07	9.60933e+07	9.86634e+07	100843882	67803268	6.19452e+07	6.91474e+07	9.73199e+07	7.84317e+07	7.5088e+07	1.16482e+08	1.37399e+08	1.19921e+08	4.12481e+07	9.62637e+07	5.82817e+07	1.03869e+08	1.27844e+08	3.26406e+07	9.80012e+07	1.02207e+08	1.05726e+08	6.4771e+07	1.13521e+08	1.06965e+08	1.30875e+08	9.69694e+07	9.97671e+07	9.58128e+07	8.99034e+07	8.76769e+07	8.72992e+07	8.63366e+07	9.14413e+07	9.00746e+07	5.91189e+07	9.79205e+07	8.97814e+07	9.08834e+07	7.68864e+07	7.28381e+07
Com_12461_pos	Orotidine	C10 H12 N2 O8	288.06	5.348	289.068	No results	No results	Full match	525247	456961	451649	459232	313192	292911	359836	438293	370082	509080	466828	436387	494532	438821	396865	264681	340757	424350	460135	411140	379974	358926	2.18492e+06	446423	378585	384899	470161	569666	581364	474535	537838	559094	514578	553247	501854	387422	386288	505374	516626	395997	472969
Com_1253_pos	ACar 12:1	C19 H36 N O4	341.257	12.15	342.265	No results	Invalid mass	No results	1.28669e+08	7.73274e+07	5.4282e+07	5.04169e+07	4.67292e+07	4.70259e+07	2.47083e+07	1.14211e+08	4.74233e+07	1.0234e+08	5.21826e+07	2.01851e+08	1.65435e+08	1.19155e+08	2.91601e+07	4.0744e+07	3.88288e+07	2.44883e+08	6.33285e+07	6.54131e+07	6.40688e+07	4.63825e+07	6.02021e+06	1.22177e+08	8.31269e+07	7.65578e+07	6.24785e+07	3.79894e+07	6.2273e+07	6.11886e+07	5.58624e+07	3.67886e+07	7.83838e+07	5.68938e+07	4.34935e+07	4.99913e+07	5.84735e+07	9.88827e+07	1.3263e+08	4.09136e+07	4.85601e+07
Com_12621_pos	PC (18:5e/22:5)	C48 H78 N O7 P	811.545	14.99	812.552	No results	Invalid mass	No results	690223	691710	614659	690057	414197	449197	531596	630817	493504	1.21183e+06	713922	582617	652414	3.36231e+06	925043	417690	743558	716157	650528	841324	1.13722e+06	639204	384368	630049	1.0724e+06	565725	712788	721440	667657	983127	585569	693133	707169	642707	630777	446702	447017	611553	657524	649889	480811
Com_1267_pos	Asparagine	C4 H8 N2 O3	132.054	1.27	133.061	Full match	Full match	Full match	1.87207e+08	1.47984e+08	1.4502e+08	2.31074e+08	1.40183e+08	1.1732e+08	1.32072e+08	1.669e+08	1.69778e+08	2.01779e+08	2.21429e+08	1.88298e+08	2.42361e+08	1.94456e+08	1.12027e+08	150672052	1.6111e+08	1.7709e+08	2.30616e+08	1.71276e+08	1.72002e+08	1.80398e+08	6.05195e+07	2.19368e+08	1.84489e+08	1.21607e+08	1.5303e+08	1.11548e+08	8.70263e+07	1.36714e+08	142038892	1.31261e+08	1.32565e+08	9.26787e+07	1.17657e+08	7.64182e+07	8.54711e+07	1.11319e+08	1.24661e+08	1.35308e+08	1.46675e+08
Com_12735_pos	PC (14:0e/18:0)	C40 H82 N O7 P	719.582	15.723	720.589	No results	Full match	No results	2.15381e+06	1.39726e+06	1.53261e+06	2.68285e+06	1.67153e+06	1.32892e+06	1.19058e+06	2.58068e+06	2.4014e+06	1.97112e+06	2.85064e+06	2.6201e+06	2.74387e+06	372119	1.76816e+06	1.10393e+06	2.79445e+06	2.48548e+06	2.98487e+06	2.57224e+06	1.32122e+06	2.15156e+06	1.18125e+06	2.64806e+06	2.85369e+06	3.13776e+06	1.43164e+06	1.3688e+06	747246	1.38093e+06	1.38581e+06	1.29703e+06	2.53881e+06	1.11048e+06	1.29006e+06	1.2935e+06	743706	605429	1.95183e+06	956278	1.63613e+06
Com_1284_pos	(±)8-HEPE	C20 H30 O3	300.209	13.79	301.216	Invalid mass	No results	No match	9.8987e+06	1.16283e+07	11490403	9.93754e+06	8.29652e+06	6.05587e+06	8.3068e+06	9.57114e+06	7.7092e+06	1.09564e+07	1.57464e+07	9.57717e+06	1.02247e+07	8.50311e+06	1.02248e+07	6.42096e+06	8.98324e+06	1.20201e+07	8.40667e+06	1.03357e+07	8.07883e+06	9.08647e+06	1.41822e+08	4.47167e+06	9.48983e+06	1.09907e+07	1.39389e+07	1.04622e+07	1.36824e+07	1.122e+07	1.06744e+07	1.27689e+07	9.7892e+06	1.0473e+07	1.04513e+07	9.08926e+06	7.79936e+06	9.97897e+06	1.02019e+07	1.05286e+07	8.71005e+06
Com_12957_pos	Kynurenic acid	C10 H7 N O3	189.042	1.119	396.118	No results	No results	Full match	1.90291e+06	1.88712e+06	1.57901e+06	1.68921e+06	1.37351e+06	1.81619e+06	1.51229e+06	1.54971e+06	1.31563e+06	2.12807e+06	1.7248e+06	2.1981e+06	1.34699e+06	1.79853e+06	2.4825e+06	1.51203e+06	1.25904e+06	1.12229e+06	1.886e+06	1.09165e+06	1.48723e+06	1.71212e+06	551182	1.93869e+06	1.88268e+06	1.86603e+06	1.61459e+06	2.23862e+06	3.19114e+06	1.33102e+06	1.25174e+06	3.36183e+06	1.53905e+06	2.60921e+06	1.70833e+06	812388	1.94078e+06	3.38384e+06	2.7454e+06	925586	2.04801e+06
Com_1298_pos	6-Methylquinoline	C10 H9 N	143.074	6.692	144.081	Full match	No results	No results	1.26163e+08	1.2292e+08	1.19049e+08	1.34435e+08	7.89203e+07	8.10406e+07	7.38105e+07	1.27985e+08	1.09888e+08	1.51532e+08	1.19396e+08	1.40811e+08	1.74369e+08	1.41881e+08	1.22213e+08	8.75873e+07	1.20902e+08	1.52721e+08	1.20798e+08	1.33899e+08	1.22416e+08	1.39099e+08	1.39178e+08	1.56135e+08	1.25712e+08	1.41559e+08	1.11313e+08	9.16512e+07	1.01391e+08	9.26362e+07	7.02332e+07	7.94857e+07	5.78224e+07	87920212	7.17276e+07	4.73335e+07	3.86937e+07	2.00716e+07	6.28047e+07	7.5029e+07	8.30561e+07
Com_13044_pos	PC (19:2/18:5)	C45 H76 N O8 P	789.527	13.942	790.534	No results	Invalid mass	No results	458281	1.20882e+06	288608	280805	365881	659333	1.35763e+06	383590	1.2685e+06	736417	296408	313722	311776	248573	464962	1.43023e+06	493632	272054	262415	229807	410586	280115	1.26419e+06	599863	372666	226829	431541	423829	481934	346375	2.18177e+06	349438	407176	369887	333218	2.22911e+06	916267	1.01376e+06	309101	365156	248236
Com_13094_pos	SM (d18:3/24:2)	C47 H87 N2 O6 P	806.633	16.363	807.64	No results	Full match	No results	159151	166138	276894	232737	106951	115098	249321	154552	140653	220688	166512	261198	162012	152094	268097	106135	260405	324427	272266	212467	242022	369057	193918	241054	160537	144951	244947	221179	218262	198945	314969	341396	198391	3.38831e+06	173696	137121	133395	172265	176312	195949	216257
Com_133_pos	Valine	C5 H11 N O2	117.079	1.694	118.087	Full match	No results	Full match	1804807007	1429426776	1666496656	2079472428	1282606004	1220562217	1121653643	1745439624	1865248546	1834090209	2619272503	1665880319	2035358372	1740214989	2026999630	1036422879	1301637173	1732238298	1970283206	1980779231	1868203331	1787974557	3249816264	2465484200	1266580419	1271278926	1829605446	9.36512e+08	1691470111	1359935922	1535507128	1545997441	1561517124	2007290302	1348231699	1287868791	1254343603	1866275125	1928294271	1044088793	1118353057
Com_1354_pos	4-(methylthio)-6-morpholino-1,3,5-triazin-2-amine	C8 H13 N5 O S	227.085	8.477	228.093	Invalid mass	No results	No results	1.4598e+06	1.10271e+06	1.403e+06	1.23792e+06	100438441	1.07159e+08	1.16338e+08	1.47485e+06	7.56253e+07	1.53754e+06	1.51835e+06	1.99263e+06	1.57587e+06	1.00748e+06	2.58084e+07	1.15386e+08	6.20841e+07	1.28768e+06	1.44959e+06	1.13122e+06	1.39713e+06	1.67399e+06	130945941	1.10752e+06	3.31759e+07	1.93081e+07	1.38201e+06	1.48404e+06	2.11407e+06	1.30197e+06	1.32366e+06	1.29527e+06	1.3387e+06	1.16606e+07	1.19367e+06	8.36363e+07	8.32496e+07	3.73322e+07	1.12952e+07	4.82733e+07	9.06723e+07
Com_13688_pos	PC (18:2e/18:0)	C44 H86 N O7 P	771.613	14.934	772.62	No results	Full match	No results	1.38651e+06	1.16799e+06	978406	922953	687109	438149	1.32183e+06	709343	791228	1.15856e+06	836296	807454	1.88209e+06	1.15555e+06	515583	736673	1.28408e+06	1.26669e+06	952522	1.07094e+06	643725	1.35726e+06	739278	1.15937e+06	1.15855e+06	1.15517e+06	1.36093e+06	1.27334e+06	1.62764e+06	1.73339e+06	824843	2.08687e+06	1.49379e+06	1.66834e+06	1.25377e+06	762151	940901	895710	1.52431e+06	904302	489531
Com_1369_pos	Styrene	C8 H8	104.063	7.818	105.07	No results	No results	Full match	1.74028e+07	1.67523e+07	1.65957e+07	1.7378e+07	84889445	8.44507e+07	1.28494e+08	1.46379e+07	5.6088e+07	1.71955e+07	1.71848e+07	1.67882e+07	1.83811e+07	1.39001e+07	4.24582e+07	8.65759e+07	5.31784e+07	1.56425e+07	1.78124e+07	1.41627e+07	1.36501e+07	1.4352e+07	1.05581e+08	1.70552e+07	3.17858e+07	2.60911e+07	2.35984e+07	2.39896e+07	2.44065e+07	1.83134e+07	2.12065e+07	2.04222e+07	2.08468e+07	4.76139e+07	1.81675e+07	1.49407e+08	1.31122e+08	7.85214e+07	3.86672e+07	4.47196e+07	1.63862e+08
Com_136_pos	Uric acid	C5 H4 N4 O3	168.029	1.646	169.036	Full match	No results	Full match	3214357567	3339455412	3545028489	3422920496	2469375027	2229608722	2174188304	3027706624	4000436183	3418226512	3688220616	4397920460	4248251959	2343462760	3777384486	1850911737	3138097146	2677795672	2599977947	3161742371	2972198595	2294889196	1608821591	3903764138	2734598019	2667334034	2486405111	2662181338	4176136007	2479645159	2928990177	4167964569	2814834918	2897098370	2568766903	2345511784	1895966844	3401071455	3323229964	2545419563	2748001255
Com_1371_pos	Tetrahydrocorticosterone	C21 H34 O4	367.273	12.482	368.28	Invalid mass	Invalid mass	No results	1.77447e+08	8.21201e+07	4.77052e+07	5.11588e+07	4.01838e+07	3.41044e+07	3.04243e+07	1.19607e+08	3.98207e+07	1.05833e+08	4.3293e+07	1.46258e+08	1.68305e+08	1.21521e+08	3.3332e+07	3.78816e+07	2.64739e+07	2.14339e+08	4.7039e+07	6.86644e+07	6.07188e+07	4.59422e+07	1.24594e+07	1.50189e+08	7.6246e+07	8.11475e+07	5.08152e+07	3.68857e+07	3.98435e+07	7.49258e+07	5.13446e+07	3.93663e+07	5.08849e+07	3.85365e+07	3.25861e+07	5.83623e+07	7.46725e+07	1.02248e+08	1.5972e+08	3.65523e+07	3.96968e+07
Com_13752_pos	Alloxan	C4 H4 N2 O5	160.012	1.659	321.032	No results	No results	Full match	426433	418423	424360	426065	981341	1.51477e+06	1.32393e+06	388742	1.62098e+06	440238	438340	470979	491737	384647	854164	923111	750393	389391	443358	374720	403457	380898	1.34267e+06	454820	531401	369682	575857	574105	590039	492440	508342	520427	507046	490121	462443	1.55793e+06	1.01774e+06	1.02597e+06	532492	1.04756e+06	1.50939e+06
Com_1379_pos	Valeryl fentanyl-d5	C24 H27 [2]H5 N2 O	369.288	12.636	370.296	Invalid mass	Invalid mass	No results	1.65724e+08	6.57681e+07	5.08408e+07	2.94716e+07	2.79761e+07	2.62373e+07	2.06745e+07	9.05426e+07	31044406	9.36078e+07	4.10725e+07	1.20834e+08	1.29321e+08	7.94015e+07	1.47821e+07	2.63484e+07	2.11238e+07	2.12261e+08	3.80827e+07	4.94485e+07	4.90801e+07	3.64965e+07	3.23168e+06	124041814	7.38616e+07	6.42685e+07	1.92924e+07	2.24303e+07	3.38459e+07	4.01788e+07	4.25905e+07	2.53644e+07	4.86915e+07	2.7352e+07	2.55108e+07	3.39094e+07	5.54541e+07	8.00691e+07	8.66711e+07	3.13557e+07	2.45541e+07
Com_13844_pos	CDP	C9 H15 N3 O11 P2	403.02	1.282	404.027	No results	No results	Full match	756375	559470	754467	729733	438731	491031	441843	630222	490473	794774	547147	714413	825111	808045	648781	445540	548620	660894	740215	676093	526334	806383	470988	799413	660999	746868	765330	793759	895035	586600	710613	736124	731530	866565	695113	569127	566450	711353	733290	608459	688473
Com_14043_pos	hydroxyphenylpyruvate	C9 H7 O4	179.034	1.035	180.041	No results	No results	Full match	1.78087e+06	1.20182e+06	1.13396e+06	1.39243e+06	814194	799045	927097	1.13688e+06	858002	1.28266e+06	1.62473e+06	1.28507e+06	1.17961e+06	1.17026e+06	1.08174e+06	883514	772813	986061	1.20187e+06	1.40759e+06	1.21863e+06	1.26628e+06	1.00464e+06	852276	1.0212e+06	962084	2.72092e+06	1.78386e+06	1.72272e+06	1.78592e+06	2.26618e+06	1.76402e+06	1.08252e+06	1.60705e+06	1.78153e+06	1.05865e+06	1.1508e+06	1.16217e+06	1.60982e+06	925988	981198
Com_1415_pos	p-Mentha-1,3,8-triene	C10 H14	134.11	14.872	135.117	No results	No results	Full match	2.92367e+07	2.56048e+07	3.07444e+07	2.57484e+07	1.86964e+07	2.03242e+07	1.97023e+07	2.62397e+07	1.75661e+07	2.65595e+07	2.89019e+07	2.92326e+07	3.34066e+07	2.83233e+07	2.36156e+07	1.66977e+07	2.30412e+07	2.24037e+07	2.74719e+07	2.51487e+07	2.22446e+07	2.42271e+07	1.952e+07	3.13673e+07	2.57013e+07	2.62707e+07	3.3708e+07	3.18476e+07	3.29492e+07	2.55749e+07	2.49473e+07	2.92061e+07	3.2558e+07	3.47311e+07	2.83993e+07	1.68805e+07	1.97561e+07	2.82326e+07	3.60578e+07	2.22924e+07	2.30785e+07
Com_14168_pos	Sucrose octaacetate	C28 H38 O19	1390.47	9.786	696.241	Invalid mass	No results	No results	387685	1.53801e+06	957219	981714	550687	1.14176e+06	807094	915936	280986	1.02293e+06	327353	1.56178e+06	2.79434e+06	1.19889e+06	317663	884453	1.15833e+06	365431	1.43963e+06	905760	1.62395e+06	482035	232969	343845	1.95443e+06	548679	439918	429401	1.51275e+06	367417	860779	915140	1.28011e+06	537638	1.5182e+06	809514	692621	1.17566e+06	568308	1.39171e+06	349754
Com_142_pos	3-Methyladipic acid	C7 H12 O4	160.074	8.044	161.081	No results	Full match	Full match	4.89028e+07	4.65189e+07	4.88205e+07	4.15212e+07	1.23138e+08	1.19245e+08	4.11702e+08	3.94155e+07	1.46181e+08	46218817	4.54723e+07	4.89813e+07	5.22471e+07	4.28932e+07	2.6583e+08	1.02393e+08	3.99885e+07	5.05031e+07	4.88115e+07	3.7719e+07	4.06274e+07	4.13935e+07	2902947603	5.49803e+07	4.87957e+07	1.60638e+08	5.19542e+07	5.47241e+07	5.78671e+07	4.47323e+07	4.54243e+07	5.36816e+07	4.80194e+07	8.3894e+07	4.73945e+07	329405399	1.21664e+08	1.00372e+08	5.83558e+07	9.84561e+07	1.21972e+08
Com_143_pos	AL 8810 Methyl ester	C25 H33 F O4	438.224	12.561	439.231	Invalid mass	No results	No results	4.22319e+06	4.17575e+06	4.1719e+06	3.99392e+06	1736502261	1543681270	1118381439	3.84969e+06	1633142282	5.51436e+06	4.39208e+06	4.04576e+06	4.3776e+06	3.6305e+06	2.73199e+08	1560392529	4.19388e+08	3.78263e+06	4.14242e+06	3.52721e+06	3.58436e+06	3.53248e+06	9.84288e+08	4.15549e+06	1.72429e+08	1.71732e+08	8.34964e+06	8.72645e+06	8.49919e+06	6.77607e+06	6.94492e+06	7.024e+06	6.51918e+06	1.32272e+08	5.66047e+06	2060501081	1897517215	269713257	1.02253e+08	1482304531	1298194445
Com_1448_pos	2,3-dihydroxypropyl 12-methyltridecanoate	C17 H34 O4	324.228	14.365	325.236	Invalid mass	No results	No results	4.38731e+07	4.40579e+07	5.21822e+07	5.03592e+07	1.16964e+08	4.78874e+07	3.22049e+07	7.06292e+07	3.84504e+07	4.674e+07	7.16868e+07	6.16297e+07	5.59836e+07	3.85504e+07	4.88489e+07	3.17944e+07	5.94624e+07	6.52717e+07	5.14599e+07	1.75381e+08	4.2544e+07	4.06835e+07	3.03553e+07	5.76547e+07	4.91228e+07	3.81157e+07	5.11258e+07	4.44234e+07	5.90469e+07	3.42503e+07	4.93147e+07	1.01443e+08	4.98911e+07	5.38665e+07	3.22833e+07	2.55542e+07	3.34161e+07	4.69703e+07	4.54228e+07	3.85485e+07	4.97026e+07
Com_1453_pos	23-Nordeoxycholic acid	C23 H38 O4	378.278	14.6	379.284	No results	No results	Full match	9.57455e+07	4.02693e+07	4.2337e+07	4.38597e+07	8.20987e+07	5.27243e+07	3.36848e+07	1.29032e+08	3.93568e+07	5.02131e+07	1.35367e+08	2.82852e+07	4.19169e+07	6.53261e+07	5.67807e+07	2.60754e+07	4.17016e+07	1.00293e+08	4.65208e+07	1.74448e+08	4.47269e+07	4.49255e+07	4.4715e+07	5.35129e+07	2.79738e+07	5.84147e+07	4.91749e+07	4.55605e+07	4.88261e+07	3.59975e+07	3.59034e+07	8.52489e+07	2.47235e+07	5.03733e+07	6.28567e+07	2.11955e+07	3.4264e+07	1.14149e+08	4.59731e+07	2.53712e+07	1.00374e+08
Com_1456_pos	Anandamide (AEA)	C22 H37 N O2	347.281	15.042	348.288	Full match	No results	No results	3.336e+06	2.0919e+06	7.64181e+07	6.92618e+07	1.35845e+06	4.65886e+06	6.44314e+06	7.64813e+07	4.89327e+07	6.49036e+07	7.38293e+06	6.47537e+06	8.02424e+06	1.24166e+07	4.11973e+06	1.66395e+06	6.59062e+06	2.25722e+06	5.99572e+06	6.19114e+06	9.99545e+06	6.97135e+06	1.99137e+07	4.22796e+06	1.6071e+06	7.6356e+06	2.91874e+07	1.34682e+08	4.62782e+06	1.78741e+08	5.91326e+06	1.35655e+08	4.08168e+06	3.4491e+06	5.02609e+06	1.1782e+06	7.77899e+06	4.50533e+06	4.07116e+06	4.20512e+06	8.09129e+06
Com_14576_pos	PC (18:2e/15:0)	C41 H80 N O7 P	729.565	15.846	730.572	No results	Full match	No results	870773	2.14899e+06	563184	511590	396088	403316	390734	913619	823613	652390	560951	1.09268e+06	665804	540327	898629	333536	717400	546356	1.11483e+06	516475	516755	758707	766698	1.07715e+06	552194	706231	635002	744095	1.29543e+06	541532	1.15677e+06	583153	693776	666158	630284	419650	482344	574436	625640	914730	498420
Com_1457_pos	PC (18:2e/16:0)	C42 H82 N O7 P	743.585	16.872	744.592	No results	Full match	No results	4.17752e+06	5.06326e+06	6.68023e+06	4.98306e+06	3.67789e+06	7.38933e+06	5.45506e+06	6.68427e+06	3.6734e+06	6.14834e+06	2.31459e+06	7.45089e+06	4.13399e+06	6761491	5.10465e+06	3.60815e+06	4.60751e+06	7.06256e+06	6.94901e+06	4.84226e+06	2.8027e+06	4.78317e+06	3.77982e+06	9.50911e+06	7.10801e+06	5.70923e+06	1.08187e+07	1.07991e+07	1.12e+07	6.4288e+06	1.32422e+07	1.12394e+07	1.00046e+07	9.22543e+06	1.08196e+07	7.3074e+06	4.59359e+06	8.49771e+06	4.82748e+06	6.19937e+06	5.15117e+06
Com_1458_pos	7-Ketodeoxycholic acid	C24 H38 O5	406.27	14.367	407.277	No results	No results	Full match	7.89602e+07	1.0176e+08	6.14208e+07	143985833	2.64089e+07	1.73236e+07	3.29312e+07	5.99364e+07	5.15978e+07	7.34927e+07	5.55064e+07	4.93893e+07	7.39044e+07	8.8568e+07	3.21324e+07	5.13934e+07	1.14006e+08	6.81815e+07	9.19638e+07	4.68806e+07	6.51778e+07	65342424	4.95584e+07	9.2102e+07	1.07757e+08	1.14012e+08	8.1358e+07	1.16301e+08	6.2763e+07	1.93057e+08	6.94613e+07	4.04247e+06	7.75096e+07	6.00465e+07	7.23789e+07	4.74605e+07	1.13952e+08	1.10334e+08	1.07236e+08	4.51054e+07	4.33188e+07
Com_14642_pos	PC (16:0/17:2)	C41 H78 N O8 P	743.548	16.934	744.555	No results	Full match	No results	967028	646234	602926	670882	932316	892314	1.23155e+06	1.14356e+06	800721	805796	1.021e+06	763853	1.71511e+06	544974	479299	606773	1.3741e+06	1.0672e+06	1.40125e+06	755968	998212	602393	539755	694068	717644	978074	1.19611e+06	582194	995125	2.18276e+06	1.11336e+06	949772	863675	1.56092e+06	1.88517e+06	563593	493979	696905	1.02399e+06	762778	874792
Com_14644_pos	PC (15:0/16:0)	C39 H78 N O8 P	719.55	15.046	720.558	No results	Invalid mass	No results	621621	683541	572736	602775	560741	1.46816e+06	401030	1.79059e+06	426109	987094	574680	681355	637000	561029	808086	382629	480883	635321	791126	721938	593341	576400	638029	596331	1.49618e+06	495601	633035	617134	648894	941680	605154	563760	713054	1.79222e+06	1.97663e+06	570574	476649	965970	852964	446623	451104
Com_14703_pos	PC (17:1/17:1)	C42 H80 N O8 P	757.565	0.582	758.572	No results	Full match	No results	1.25964e+06	967950	939502	1.2197e+06	1.01673e+06	841797	1.2965e+06	1.79039e+06	1.01777e+06	1.20148e+06	1.99031e+06	1.04859e+06	1.14118e+06	479928	1.13584e+06	888253	1.13336e+06	1.74311e+06	969565	1.20055e+06	1.31922e+06	1.61713e+06	862036	1.37771e+06	1.15939e+06	944826	616119	1.46925e+06	1.23099e+06	1.56094e+06	1.73573e+06	1.61213e+06	1.93083e+06	1.75772e+06	1.21247e+06	1.4335e+06	879773	788349	641369	754586	1.46755e+06
Com_1474_pos	LPE 18:1	C23 H46 N O7 P	479.302	14.682	480.309	No results	Full match	Full match	7.47258e+07	1.30067e+08	9.68883e+07	1.22335e+08	1.28354e+08	1.13583e+08	7.47166e+07	1.15567e+08	7.16518e+07	7.81246e+07	8.59739e+07	1.18735e+08	1.03863e+08	8.38986e+07	120961632	1.05884e+08	1.22074e+08	9.60336e+07	8.47968e+07	1.56889e+08	1.15058e+08	166037299	4.314e+06	1.02488e+08	1.36031e+08	1.14725e+08	1.08945e+08	3.8971e+07	1.2448e+08	1.04723e+08	8.13931e+07	139172467	1.07643e+08	1.4481e+08	8.21152e+07	7.35099e+07	6.68364e+07	6.4617e+07	6.32483e+07	5.47942e+07	8.63757e+07
Com_1478_pos	12,13-EODE	C18 H32 O3	296.235	15.369	297.243	No results	No results	Full match	6.34785e+07	9.49396e+07	1.42186e+08	1.74381e+08	4.63764e+07	4.90672e+07	5.55652e+07	9.48367e+07	7.7459e+07	1.0816e+08	1.33128e+08	9.53436e+07	1.60026e+08	1.17801e+08	1.39787e+08	1.18014e+08	9.67831e+07	1.23697e+08	8.50732e+07	1.03857e+08	1.2585e+08	1.33055e+08	8.75253e+07	2.06403e+08	1.13302e+08	1.18844e+08	1.41002e+08	1.02462e+08	9.80926e+07	9.01175e+07	1.22957e+08	9.95337e+07	1.33568e+08	1.04138e+08	9.72965e+07	6.99004e+07	1.28321e+08	9.81341e+07	1.42465e+08	5.58339e+07	5.36319e+07
Com_15132_pos	Prostaglandin A3	C20 H28 O4	332.195	6.355	333.203	Invalid mass	No results	No results	127603	177395	247853	121415	923221	811366	1.23579e+06	154840	453898	127707	262605	133402	193986	159455	270692	725995	434348	147639	190771	116481	167893	145742	874575	171078	254460	231317	161568	171452	173329	145285	149328	150927	150999	320005	148239	694418	590184	521509	283453	596567	858428
Com_1514_pos	3-hydroxy-3,4-bis[(4-hydroxy-3-methoxyphenyl)methyl]oxolan-2-one	C20 H22 O7	391.159	14.033	392.166	Invalid mass	No results	No results	1.35291e+08	1.48815e+08	6.08857e+07	5.94595e+07	2.54179e+07	4.07422e+07	2.33068e+07	3.47004e+07	9.35742e+07	5.70607e+07	9.98066e+07	2.45813e+07	2.84701e+07	5.54168e+07	1.45391e+07	7.00254e+07	4.20144e+07	1.14391e+08	6.14635e+07	1.08311e+08	5.06535e+07	1.34453e+08	1.08835e+08	5.03811e+07	2.76584e+07	2.75564e+07	5.66643e+07	2.10051e+07	2.88127e+07	1.85153e+08	1.90813e+07	7.00455e+07	4.87575e+07	9.16142e+06	7.81619e+07	2.38611e+07	3.0537e+07	9.06615e+06	1.32385e+07	2.11619e+07	3.77914e+07
Com_151_pos	L-Glutamic acid	C5 H9 N O4	147.053	1.265	148.061	Full match	Full match	Full match	1357362048	1122417082	1272917921	5.71745e+08	8.75174e+08	7.65518e+08	8.88904e+08	1100268459	1175728171	1337876329	1621859464	1039881264	1217277759	1418000158	1614528132	893258573	986191706	1678316355	1715654045	1446627327	1321633319	1372614438	2503143994	1351409426	9.47922e+08	1478591829	7.77753e+08	4.06087e+08	2.91026e+08	6.32005e+08	5.00921e+08	4.51377e+08	6.30174e+08	6.23123e+08	8.14577e+08	5.43903e+08	7.42743e+08	5.56927e+08	1165347866	1019422215	1144767129
Com_15205_pos	S-(Methyl)Glutathione	C11 H19 N3 O6 S	321.101	11.529	322.108	No results	No results	Full match	197584	169398	190510	174412	149733	148356	156357	169310	156806	189691	199467	196409	208652	184155	171827	139593	174356	191410	211661	187321	150480	191265	447742	184680	192479	173365	271223	269150	283257	241352	244585	247511	243974	259887	229021	164151	206033	230140	217094	192297	195836
Com_152_pos	PC (20:3/20:3)	C48 H84 N O8 P	833.594	15.565	834.602	No results	Full match	No results	1916047094	1926409655	4151300189	3205538892	1461227999	5.60365e+08	1590943907	2665222277	1270452413	2565295981	2061095439	2242393241	2317790916	1962445299	2037472124	1699928265	1598181429	1742967820	1887318766	3159217738	2174085794	2537472237	8.23678e+08	2081780882	1827323431	1593204517	1886851086	2728334411	2110490936	2834997843	4196419385	1965068126	2484029634	2039526638	2496425252	1630555265	5.71596e+08	2247092202	1836477879	2043109160	1401724183
Com_1533_pos	SM (d23:1/15:1)	C43 H85 N2 O6 P	756.615	15.809	757.622	No results	Full match	No results	1.32103e+08	1.10154e+08	1.19664e+08	1.48922e+08	7.18949e+07	7.45071e+07	8.78259e+07	1.24815e+08	6.98815e+07	1.40225e+08	1.53724e+08	1.16358e+08	8.62427e+07	8.36624e+07	1.12781e+08	7.06395e+07	105858458	9.00148e+07	1.15101e+08	8.37345e+07	8.0263e+07	1.0216e+08	7.02139e+07	1.0947e+08	1.24356e+08	9.53963e+07	1.75353e+08	1.6259e+08	1.86027e+08	1.40391e+08	1.34211e+08	1.46855e+08	1.78852e+08	9.72575e+07	1.12092e+08	1.01486e+08	7.13863e+07	1.34211e+08	1.20409e+08	1.01628e+08	1.11887e+08
Com_15349_pos	Levodopa	C9 H11 N O4	197.069	14.473	198.077	No results	No results	Full match	352691	207285	236066	246119	131647	139952	148977	226336	150327	352823	203302	223967	382866	1.72268e+06	156597	137912	174397	199487	289945	166896	192367	289402	107093	191032	175129	167029	832356	432132	331241	1.08673e+06	303847	252201	225122	207911	211538	147319	144390	194543	189427	168983	159376
Com_15373_pos	PC (16:1e/22:3)	C46 H86 N O7 P	1591.23	14.29	796.621	No results	Invalid mass	No results	519956	310723	259168	352177	314318	294498	307418	270035	779706	476637	249335	1.88372e+06	571283	250173	253840	213989	655962	356696	587476	125096	176530	494119	203492	580346	819708	430456	1.09037e+06	913336	573909	524015	187144	381165	277921	475179	537358	303626	320056	601861	372860	352761	415172
Com_1542_pos	Palmitoylcarnitine	C23 H45 N O4	399.336	13.385	400.343	Full match	Not the top hit	Full match	1.75303e+08	9.58649e+07	9.07446e+07	7.72283e+07	4.68942e+07	5.71982e+07	4.29929e+07	9.65862e+07	6.5305e+07	8.82328e+07	8.13676e+07	1.18006e+08	1.15847e+08	8.99067e+07	5.40154e+07	6.80138e+07	5.79445e+07	1.34368e+08	7.62735e+07	8.97249e+07	9.02422e+07	7.5369e+07	3.0468e+06	1.17472e+08	9.44859e+07	9.12103e+07	6.07035e+07	5.61552e+07	7.04517e+07	7.2668e+07	6.52471e+07	8.8349e+07	1.01093e+08	6.22605e+07	8.05139e+07	5.39165e+07	5.57332e+07	8.34669e+07	7.35209e+07	5.8331e+07	4.58142e+07
Com_156_pos	Cyclohexaneacetic acid	C8 H14 O2	142.1	10.491	143.107	No results	No results	Full match	5.07433e+07	5.10238e+07	5.36243e+07	5.70885e+07	4.80089e+08	4.3296e+08	7.66263e+08	4.76384e+07	3.25582e+08	5.35012e+07	5.35541e+07	5.3538e+07	5.9514e+07	4.82438e+07	2.50643e+08	4.10499e+08	2.36155e+08	5.46029e+07	5.67646e+07	4.68145e+07	4.82833e+07	4.85199e+07	2437405457	5.90691e+07	8.3449e+07	1.82544e+08	6.38261e+07	6.5736e+07	7.08968e+07	5.6926e+07	5.74289e+07	6.20319e+07	6.13237e+07	1.5766e+08	5.68301e+07	7.61833e+08	449272465	2.38069e+08	9.89925e+07	2.88884e+08	3.72008e+08
Com_15871_pos	alpha-Benzylsuccinic acid	C11 H12 O4	208.073	2.987	209.08	No results	No results	Full match	1.11067e+06	1.2742e+06	1.08279e+06	1.03602e+06	827536	548236	767427	1.05339e+06	751591	1.19986e+06	1.07266e+06	1.14163e+06	1.00812e+06	731014	947062	542516	1.07801e+06	1.53458e+06	1.21228e+06	1.22405e+06	1.11849e+06	1.34167e+06	545925	1.08591e+06	1.04285e+06	700469	610043	896790	1.64872e+06	1.3362e+06	1.20823e+06	1.35901e+06	1.27338e+06	803846	1.27682e+06	578910	701413	1.15922e+06	869082	877364	975345
Com_1592_pos	L-Saccharopine	C11 H20 N2 O6	276.133	1.272	277.14	Full match	Full match	Full match	5.94736e+06	5.69151e+06	6.21585e+06	5.99699e+06	4.17422e+06	4.15394e+06	4.34897e+06	5.69257e+06	4.46601e+06	6.05068e+06	5.78042e+06	6.54124e+06	7.54276e+06	6.38845e+06	5.95369e+06	4.02651e+06	5.40776e+06	5.99416e+06	6.23855e+06	5.38475e+06	5.99551e+06	6.74003e+06	1.02709e+08	7.22334e+06	5.80019e+06	6.89043e+06	6.06935e+06	6.31467e+06	6.91989e+06	5.4662e+06	6.16371e+06	6.12823e+06	6.02118e+06	6.23388e+06	5.47951e+06	4.17919e+06	4.23276e+06	5.82229e+06	6.3431e+06	5.07252e+06	4.82516e+06
Com_15944_pos	5-(6-hydroxy-6-methyloctyl)-2,5-dihydrofuran-2-one	C13 H22 O3	248.14	10.259	249.147	Invalid mass	No results	No results	855584	865327	838339	790485	885857	499726	648948	717923	539755	680895	769505	813196	765793	633054	831657	539828	936049	830550	738392	648049	707441	668638	889712	489377	972623	734633	675631	625007	967416	607218	518488	816609	469022	630407	599827	512933	368790	676959	769156	610843	1.01482e+06
Com_1596_pos	Isoquinoline	C9 H7 N	129.058	6.506	130.065	Full match	No results	No results	9.1904e+07	104785415	1.0462e+08	1.05155e+08	5.79718e+07	4.38795e+07	6.49696e+07	1.01871e+08	8.45347e+07	1.10938e+08	1.04742e+08	8.81204e+07	1.21983e+08	1.0707e+08	9.97732e+07	9.11979e+07	9.49829e+07	1.70841e+08	9.9964e+07	1.01891e+08	8.92839e+07	9.63081e+07	7.85152e+07	1.14964e+08	100778142	1.016e+08	6.42084e+07	1.23361e+08	1.45672e+08	1.16441e+08	7.10437e+07	1.28583e+08	9.47874e+07	1.17961e+08	9.67489e+07	6.82605e+07	5.95792e+07	1.03182e+08	6.54399e+07	8.79395e+07	1.13198e+08
Com_159_pos	16(R)-HETE	C20 H32 O3	342.218	14.014	343.225	Invalid mass	No results	No results	6.35544e+07	9.54706e+07	1.21569e+08	4.77406e+07	4.05839e+07	3.01257e+06	3.14649e+07	8.45294e+07	7.12297e+07	7.39788e+07	171594609	2.41263e+07	2.1073e+07	3.53111e+07	1.4527e+07	5.18295e+07	1.72535e+07	3.02168e+08	138099651	130052061	1.23259e+08	3.20272e+08	2420819184	3.27711e+07	1.55917e+07	2.73453e+07	1.43632e+08	7.19488e+07	1.79445e+07	9.6886e+07	1.24172e+07	5.01475e+07	2.24333e+07	1.22654e+07	1.19493e+08	3.78725e+07	1.32189e+08	1.52832e+07	1.67108e+07	3.86145e+07	3.46921e+07
Com_15_pos	Hexadecanamide	C16 H33 N O	255.257	14.739	256.264	Full match	No results	No results	1707712510	1529746126	1740966478	1714133353	1190016595	1115551295	1138774772	1265137736	1071656411	1620343540	1339012867	1742053557	2022856433	1604266067	1538075396	8.61711e+08	1572283379	1517823910	1810308557	1352352347	1462667925	1389746383	9.79136e+08	1682675869	1791480627	1426431862	2267654453	2293405777	2153733356	1327328769	1561165879	1746042467	2819674117	2142887049	1999060053	1095576142	1085574140	1826809498	2344537157	1665278292	1522290011
Com_16039_pos	2-[1-oxophthalazin-2(1H)-yl]ethyl thiophene-2-carboxylate	C15 H12 N2 O3 S	300.061	5.092	301.069	Invalid mass	No results	No results	48314	44687.4	46687.2	43493.2	29014.1	45674.4	66866.2	41095.8	33539.1	47035.1	45063.5	45566.9	48784	45219.7	39196.4	27069.4	36587.2	45614.8	45658.1	40409	41040.7	42790.2	861242	44529.6	42542.9	40798.1	63887.2	65609.3	65439.1	53275.9	55438.8	58654.6	54213	57398.7	54343.7	39386.7	36834.3	48747.5	52268.4	42170	45546
Com_1615_pos	3-Hydroxysebacic acid	C10 H18 O5	218.116	8.643	219.123	No results	Full match	No results	9.02599e+06	7.48209e+06	8.49683e+06	7.53336e+06	2.93177e+07	2.98782e+07	3.75759e+07	6.52742e+06	2.64376e+07	7.53952e+06	9.02466e+06	8.3156e+06	9.06462e+06	6.74022e+06	1.66822e+07	2.90158e+07	1.81286e+07	7.18122e+06	7.50969e+06	6.30122e+06	7.40483e+06	6.81159e+06	1.00456e+08	7.77184e+06	1.16203e+07	1.25309e+07	9.59113e+06	9.71222e+06	9.36535e+06	8.20817e+06	8.42932e+06	8.95529e+06	8.92064e+06	1.39375e+07	8.84549e+06	4.28389e+07	4.01869e+07	2.42177e+07	1.08478e+07	3.02835e+07	4.07462e+07
Com_1621_pos	cis-4-Hydroxy-D-proline	C5 H9 N O3	131.059	1.259	132.066	Full match	Full match	Full match	4.07179e+07	3.36714e+07	5.37361e+07	7.15062e+07	4.10465e+07	3.2214e+07	4.84848e+07	3.91527e+07	4.51357e+07	5.12366e+07	6.01329e+07	6.54651e+07	5.86404e+07	5.3087e+07	5.51959e+07	3.1977e+07	3.34739e+07	5.83014e+07	6.23873e+07	1.00685e+08	7.58581e+07	5.99252e+07	6.25566e+07	9.35797e+07	7.44084e+07	7.26789e+07	4.44031e+07	6.37939e+07	7.9207e+07	3.85333e+07	5.29443e+07	5.31306e+07	6.75623e+07	1.55441e+08	3.85108e+07	3.46215e+07	3.09171e+07	3.87318e+07	4.42996e+07	2.99419e+07	3.19789e+07
Com_1624_pos	Homoarginine	C7 H16 N4 O2	188.128	1.176	189.135	No results	Full match	Full match	47294784	1.4373e+07	4.86943e+07	3.76369e+07	6.95302e+07	4.70081e+07	5.23582e+07	4.81409e+07	4.72942e+07	4.68523e+07	8.49715e+07	3.93884e+07	4.4978e+07	4.05681e+07	4.20392e+07	3.29602e+07	6.01024e+07	3.60132e+07	5.28343e+07	4.39926e+07	3.29074e+07	4.4801e+07	1.28823e+07	8.47077e+07	4.64274e+07	3.40289e+07	5.13743e+07	3.54415e+07	1.14254e+08	4.72539e+07	8.10673e+07	4.35142e+07	5.009e+07	1.10315e+08	5.04759e+07	1.36652e+07	2.60115e+07	59568356	2.49644e+07	2.75413e+07	3.765e+07
Com_1626_pos	PC (17:0/18:5)	C43 H76 N O8 P	743.546	15.41	744.552	No results	Invalid mass	No results	6.97855e+06	4.58312e+06	3.57744e+06	5.62764e+06	6.50658e+06	7.20046e+06	1.05489e+07	8.90988e+06	4.60845e+06	4.8716e+06	8.58001e+06	1.49171e+07	7.68816e+06	4.9031e+06	4.32912e+06	2.7308e+06	1.11597e+07	6.14761e+06	1.54217e+07	9.32564e+06	9.95529e+06	4.28184e+06	3.26816e+06	2.77804e+06	3.32156e+06	1.03479e+07	1.55742e+07	1.31429e+07	7.59595e+06	8.23045e+06	9.10795e+06	6.49019e+06	1.40697e+07	177316137	1.31601e+07	1.05494e+07	3.70352e+06	4.41802e+06	4.98369e+06	1.43869e+07	6.85387e+06
Com_1651_pos	PC (19:2/20:5)	C47 H80 N O8 P	1635.12	16.31	818.568	No results	Invalid mass	No results	109695639	1.44769e+08	1.07636e+08	1.04071e+08	6.47748e+07	9.38195e+07	9.24875e+07	122608593	8.99019e+07	1.25979e+08	1.02023e+08	1.51242e+08	9.70998e+07	130962670	113326220	6.36401e+07	9.92181e+07	1.19542e+08	5.81066e+07	8.6825e+07	8.55725e+07	8.58745e+07	5.13564e+07	1.07045e+08	9.74851e+07	8.27535e+07	1.2906e+08	1.15596e+08	1.35567e+08	1.37013e+08	1.20501e+08	1.24046e+08	1.22135e+08	1.15372e+08	1.01456e+08	8.30867e+07	8.28968e+07	1.21809e+08	7.75431e+07	8.50174e+07	9.69767e+07
Com_1674_pos	L-Fucose	C6 H12 O5	164.069	1.467	165.076	No results	No results	Full match	5.6499e+07	1.23545e+08	120508075	5.76072e+07	2.1441e+07	4.08598e+07	4.3127e+07	7.01043e+07	5.45378e+07	6.70775e+07	5.98151e+07	8.26475e+07	5.25187e+07	8.85275e+07	8.4457e+07	4.69608e+07	1.24121e+08	1.05806e+08	7.82896e+07	6.63525e+07	1.27172e+08	5.67394e+07	4.54845e+07	2.55197e+07	1.12789e+08	6.1892e+07	1.40137e+08	5.82519e+07	7.78026e+07	6.05414e+07	9.9108e+07	7.33883e+07	1.19237e+08	3.46977e+07	5.09365e+07	3.2947e+07	5.50932e+07	6.1957e+07	1.65689e+08	1.18648e+08	5.58307e+07
Com_1681_pos	5-oxo-3-phenyl-5-(2-quinolinylamino)pentanoic acid	C20 H18 N2 O3	334.13	8.854	335.137	Invalid mass	No results	No results	5.22878e+07	7.72463e+07	1.88384e+07	3.97899e+07	5.77176e+07	3.63196e+07	1.22538e+07	6.3123e+07	2.19059e+07	9.15126e+07	2.22999e+07	3.06285e+07	3.31001e+07	3.28218e+07	2.46195e+06	2.6229e+07	2.96258e+07	3.05277e+07	2.63404e+07	6.46593e+07	3.42079e+07	3.10695e+07	302291	8.83729e+07	1.91429e+07	1.30438e+07	3.36442e+07	2.41023e+07	8.12062e+07	1.56049e+07	1.68663e+08	6.02859e+07	4.74598e+07	9.45955e+07	2.23765e+07	6.43454e+06	35127795	3.64928e+07	1.01271e+08	3.24727e+07	5.8016e+07
Com_16955_pos	D-Erythrose 4-phosphate	C4 H9 O7 P	200.008	0.531	218.042	No results	No results	Full match	325059	274209	301145	377630	226623	194933	378622	255168	247707	841652	302504	383951	407584	378527	513400	384789	561260	314883	919784	335121	304602	589955	205911	584038	323783	680323	305235	167507	195472	154343	174442	175630	189768	178961	206525	145259	150840	215656	214377	194209	187588
Com_169_pos	Phe-Phe	C18 H20 N2 O3	312.148	8.856	313.155	No results	No results	Full match	1526882916	1849714535	3.50812e+08	8.73424e+08	1647897135	6.59373e+08	2.48111e+08	1640628783	5.31299e+08	2341332725	4.44585e+08	6.1115e+08	643310672	743574936	5.00106e+07	6.45266e+08	5.75675e+08	7.38709e+08	5.14277e+08	1273839168	6.63629e+08	6.93866e+08	1.90406e+06	2097760456	350738403	246265993	9.69555e+08	7.37265e+08	2516711571	3.80798e+08	4131981120	1589934682	1161869292	2556908336	5.87811e+08	1.4269e+08	8.87936e+08	9.90951e+08	2456756170	7.16885e+08	1250029205
Com_17013_pos	Isoproterenol	C11 H17 N O3	211.122	11.426	212.129	No results	No results	Full match	176096	174356	217909	190189	130207	136756	139603	170347	158254	202610	198909	197466	205427	175905	168500	135738	169489	202821	202839	182566	188693	781106	311665	198526	193930	156082	194473	225975	251294	214636	243940	214123	199948	204279	220164	134745	152796	211680	218479	179051	178099
Com_17066_pos	N-acetyl-D-glucosamine	C8 H15 N O6	221.09	2.097	222.098	No results	No results	Full match	495718	359316	555668	412751	412775	259247	316725	80301.9	560480	448674	601393	390729	656555	403515	384632	287330	345765	489980	582275	582527	80745.3	409886	357443	530158	449500	386612	544100	518584	658834	320253	701197	800207	533081	537346	554559	473195	442537	474644	414709	368551	339709
Com_1708_pos	Noroxycodone-d3	C17 H16 [2]H3 N O4	304.151	7.371	305.158	Full match	No results	No results	1.24546e+08	9.72057e+07	3.69165e+07	1.06129e+07	8.71434e+06	1.2097e+07	2.14377e+07	9.71291e+06	1.42457e+07	1.38133e+07	1.37242e+07	1.10641e+07	1.51931e+07	1.53385e+07	1.26074e+07	7.95084e+06	7.8337e+06	6.02335e+06	1.3251e+07	1.22776e+07	1.32967e+07	1.51875e+07	9.86216e+06	1.15754e+07	9.40827e+06	1.28009e+07	1.26543e+07	1.79028e+07	1.59265e+07	1.24819e+07	1.52937e+07	9.50183e+06	1.94595e+07	8.65981e+06	9.79473e+06	1.39109e+07	9.10695e+06	9.35228e+06	8.29958e+06	1.31274e+07	1.44966e+07
Com_170_pos	D-(-)-Glutamine	C5 H10 N2 O3	146.069	1.274	147.077	Full match	Full match	Full match	3292794505	1501312871	2776455528	3203722780	2035422262	1866715403	1950666353	3176712705	2127914357	3215442560	2672376925	2804298830	4313175895	3075126789	1825748812	2372551446	2288130540	2825530955	3066886847	2827191737	2561679143	2539776341	768036831	3126216141	3120259691	2472834348	1530122578	2649491316	5.76027e+08	2120748981	1530948565	2331700200	1685834828	4.79035e+08	4.39541e+08	1421395683	1567864725	1233979426	2271580832	2453642612	9.31985e+08
Com_17274_pos	2-Naphthol	C10 H8 O	144.058	4.553	145.065	No results	No results	Full match	46965.2	72395.3	116574	43665.8	36895.7	30445.8	32112.2	40759.6	110331	46613.2	44614.2	129259	243090	466470	41481.6	42809.2	38357	45370.3	46042.9	39694.7	39976	38649.9	27477.6	45733.4	44795.3	38818	53595.5	93054.8	77092.4	165535	52906.7	52633.1	103161	49826.8	50442	33793	35017.1	49636.9	46995.4	73296	39172.1
Com_17307_pos	Hypotaurine	C2 H7 N O2 S	109.019	1.26	127.053	No results	No results	Full match	321574	291171	335006	315998	206712	224819	210998	292894	221320	327474	436594	354024	389589	345755	309547	196786	241885	324415	324291	284151	284249	339994	193660	337974	294465	323258	285533	313238	308376	229786	292346	479096	295387	319907	271151	203476	228847	288582	323125	274534	261147
Com_1736_pos	PC (16:0/17:1)	C41 H80 N O8 P	745.565	15.798	746.572	No results	Full match	No results	5.19138e+07	7.53478e+07	5.18568e+07	4.60647e+07	5.52106e+07	5.73464e+07	5.40697e+07	9.60693e+07	5.81119e+07	8.11345e+07	8.89583e+07	9.97576e+07	1.02851e+08	8.51593e+07	6.87772e+07	6.95671e+07	4.16134e+07	5.60062e+07	5.54006e+07	9.63689e+07	1.15714e+08	8.6353e+07	8.75211e+07	8.84682e+07	1.40761e+08	9.78796e+07	1.17759e+08	9.98049e+07	9.19827e+07	9.77307e+07	1.26182e+08	9.80112e+07	9.92733e+07	7.27526e+07	9.98734e+07	8.22806e+07	6.59553e+07	8.62307e+07	5.43828e+07	9.77679e+07	3.65979e+07
Com_1756_pos	PC (16:2e/4:0)	C28 H54 N O7 P	547.365	15.022	548.373	No results	Full match	Full match	9.32999e+07	1.20868e+08	5.93408e+07	1.12277e+08	4.73872e+07	4.67232e+07	6.13344e+07	7.47708e+07	6.31147e+07	6.40815e+07	8.22072e+07	5.09695e+07	6.3392e+07	8.68009e+07	1.0538e+08	5.49304e+07	5.0461e+07	7.85153e+07	5.73854e+07	1.21519e+08	8.39013e+07	8.77808e+07	2.32193e+07	4.6498e+07	5.94206e+07	9.3507e+07	7.96888e+07	8.57438e+07	3.77289e+07	1.01332e+08	5.53006e+07	4.7933e+07	4.80397e+07	5.6364e+07	6.08273e+07	4.10437e+07	8.19379e+07	4.80051e+07	4.97426e+07	5.1519e+07	4.58028e+07
Com_175_pos	N'-[(2,4-dihydroxyphenyl)methylene]-4-methylbenzenesulfonohydrazide	C14 H14 N2 O4 S	295.121	8.846	296.129	Invalid mass	No results	No results	1488626406	1790527410	347971734	8.43783e+08	1603962509	6.23006e+08	2.47843e+08	1592395111	5.14278e+08	2248524790	4.43305e+08	6.08032e+08	6.18856e+08	7.19603e+08	4.91756e+07	6.26178e+08	5.72154e+08	7.16336e+08	5.11619e+08	1267501525	660041536	6.69842e+08	2.50501e+06	2031431007	3.47785e+08	244850087	9.35122e+08	7.12485e+08	2433945481	3.68729e+08	3957102558	1544564457	1126812861	2460129684	564765110	1.42989e+08	862386009	9.64195e+08	2380486945	693268369	1248663093
Com_1764_pos	Acetyl-β-methylcholine	C8 H17 N O2	159.126	1.387	160.134	Full match	No results	Full match	7.97323e+07	6.69339e+07	5.49116e+07	9.35736e+07	3.63524e+07	2.29746e+07	2.52983e+07	6.81212e+07	9.65217e+07	4.10095e+07	5.74282e+07	1.12973e+08	123282203	4.4445e+07	2.81555e+07	6.37429e+07	4.95889e+07	9.95707e+07	4.38121e+07	9.44164e+07	5.84383e+07	5.62775e+07	7.91752e+07	8.28454e+07	7.43902e+07	4.70644e+07	1.13994e+08	8.09367e+07	1.02125e+08	7.26154e+07	5.94259e+07	8.31055e+07	6.28275e+07	7.12199e+07	7.56188e+07	9.93309e+07	5.82764e+07	5.70753e+07	4.45957e+07	8.73403e+07	7.77002e+07
Com_1767_pos	L-Asparagine	C4 H8 N2 O3	132.054	1.198	133.061	No results	No results	Full match	1.10132e+08	1.01424e+08	9.21706e+07	1.34765e+08	4.22223e+07	6.61605e+07	7.38401e+07	1.01476e+08	1.00604e+08	1.10925e+08	1.25212e+08	1.26173e+08	1.48381e+08	1.09051e+08	3.1322e+07	8.63596e+07	7.66943e+07	4.66889e+07	1.05635e+08	8.99729e+07	9.3711e+07	9.99675e+07	4.32046e+07	1.07048e+08	8.96435e+07	2.33442e+07	1.01478e+08	8.48308e+07	1.1541e+08	8.15097e+07	8.05542e+07	7.51708e+07	6.80053e+07	7.69585e+07	7.40038e+07	4.51457e+07	5.52693e+07	6.34461e+07	6.59798e+07	4.5548e+07	6.95508e+07
Com_1775_pos	Vitamin A	C20 H30 O	286.23	14.787	287.237	No results	No results	Full match	7.74329e+07	1.00718e+08	7.47782e+07	1.10236e+08	8.66756e+07	5.72081e+07	5.83607e+07	8.99199e+07	8.41177e+07	1.02811e+08	1.04225e+08	8.12287e+07	1.0959e+08	8.53375e+07	1.29079e+08	5.66926e+07	7.88066e+07	9.82054e+07	6.38084e+07	7.93162e+07	5.9267e+07	7.65594e+07	7.61822e+07	1.16721e+08	1.00224e+08	7.22319e+07	1.21528e+08	9.2366e+07	1.67028e+08	9.94149e+07	1.39509e+08	1.1154e+08	1.20591e+08	1.34632e+08	1.04128e+08	6.93617e+07	5.17257e+07	1.18098e+08	8.36771e+07	6.61604e+07	7.71598e+07
Com_1786_pos	DAG (16:0/18:2)	C37 H68 O5	609.534	15.192	610.541	No results	Invalid mass	No results	8.00613e+07	4.49662e+07	5.55388e+07	2.27208e+07	2.58291e+07	3.20108e+07	4.30462e+07	6.54157e+07	3.19616e+07	4.06069e+07	3.95462e+07	5.86653e+07	6.96123e+07	2.45698e+07	2.65171e+07	3.05073e+07	6.5847e+07	3.63437e+07	6.40367e+07	7.75278e+07	1.30807e+08	5.77687e+07	4.32035e+07	3.95764e+07	6.98337e+07	3.62017e+07	7.63948e+07	8.22667e+07	6.41569e+07	4.60262e+07	4.99109e+07	3.23243e+07	4.1655e+07	1.15519e+08	3.46563e+07	3.9152e+07	2.0918e+07	5.84227e+07	4.49426e+07	4.31337e+07	3.15392e+07
Com_1789_pos	L-Cystine	C6 H12 N2 O4 S2	240.024	1.277	241.032	Full match	Full match	Full match	25461186	2.28931e+07	3.18593e+07	1.60199e+07	2.53968e+07	5.17966e+07	1.81187e+07	2.52575e+07	2.39725e+07	2.28982e+07	2.33294e+07	8.13692e+07	7.20858e+07	2.67318e+07	2.19684e+07	4.21236e+07	3.66899e+07	2.83246e+07	3.08584e+07	2.63877e+07	2.8337e+07	3.03546e+07	6.61807e+06	5.97626e+07	1.44248e+08	2.86272e+07	1.65824e+07	2.00911e+07	5.97799e+07	1.51286e+07	4.34174e+07	1.13803e+07	4.47402e+07	2.23144e+07	3.84916e+07	1.12492e+07	1.5392e+07	1.27972e+07	5.15047e+07	3.91917e+07	33502309
Com_1791_pos	DL-Dipalmitoylphosphatidylcholine	C40 H80 N O8 P	733.559	16.546	734.566	Full match	Full match	Full match	8.22351e+07	8.27213e+07	1.14042e+08	1.15197e+08	6.29452e+07	6.15617e+07	6.28958e+07	7.41461e+07	1.96006e+07	8.54029e+07	1.09391e+08	9.5788e+07	7.23489e+07	7.5757e+07	6.21368e+07	4.33532e+07	6.60994e+07	1.06478e+08	1.24105e+08	8.38338e+07	1.30853e+07	6.79527e+07	3.21152e+07	6.82278e+07	9.04276e+07	9.33573e+07	9.62229e+07	1.06449e+08	7.62999e+07	7.50173e+07	1.07924e+08	7.17126e+07	9.61811e+07	1.17186e+08	8.38201e+07	7.08463e+07	4.4049e+07	1.10234e+08	6.0537e+07	7.90952e+07	5.30186e+07
Com_1809_pos	ACar 12:0	C19 H38 N O4	343.273	12.372	344.28	No results	Invalid mass	No results	4.337e+07	2.23652e+07	2.82279e+07	1.5637e+07	1.51631e+07	1.59416e+07	9.52135e+06	5.18053e+07	1.80444e+07	3.58002e+07	1.95579e+07	7.46435e+07	4.9245e+07	3.98317e+07	8.50217e+06	1.37379e+07	1.01778e+07	1.36957e+08	2.15336e+07	2.84206e+07	2.36789e+07	1.95529e+07	1.10936e+06	6.77905e+07	2.30497e+07	4.08652e+07	31756321	1.48399e+07	2.58071e+07	2.96268e+07	1.92821e+07	1.78085e+07	3.11032e+07	1.97914e+07	1.51467e+07	2.18983e+07	2.57508e+07	4.15714e+07	4.817e+07	1.4437e+07	1.68176e+07
Com_180_pos	(S)-AL 8810	C24 H31 F O4	424.208	12.306	425.215	Invalid mass	No results	No results	5.92198e+06	5.63513e+06	5.8163e+06	5.7708e+06	1548686607	4.75525e+08	6.00482e+08	5.24668e+06	1257118361	5.75547e+06	5.63357e+06	5.72303e+06	6.72933e+06	5.11525e+06	2.79586e+08	2265811764	5.90459e+08	5.80479e+06	6.3791e+06	5.03569e+06	5.29821e+06	5.23324e+06	6.49642e+08	6.34543e+06	152490567	191949415	9.05155e+06	9.3609e+06	9.69637e+06	7.58099e+06	8.14184e+06	7.46567e+06	7.90339e+06	1.51455e+08	7.06327e+06	1429651185	1539492893	2.95621e+08	8.92253e+07	7.18411e+08	5.83711e+08
Com_1813_pos	Linoleoyl Ethanolamide	C20 H37 N O2	323.283	14.031	324.29	Full match	No results	No results	1.23747e+07	1.28869e+07	1.14966e+07	1.04231e+07	8.55301e+06	8.4583e+06	8.13083e+06	1.12954e+07	8.35153e+06	1.35116e+07	1.15982e+07	1.25651e+07	1.74161e+07	1.35472e+07	1.08343e+07	7.96263e+06	9.50384e+06	1.14893e+07	1.19385e+07	1.07433e+07	1.10688e+07	1.02526e+07	6.84309e+06	1.04479e+07	1.17633e+07	8.7243e+06	1.41981e+07	1.47618e+07	1.72146e+07	1.46107e+07	13935175	1.18228e+07	1.37546e+07	1.28097e+07	1.33368e+07	9.55085e+06	9.22313e+06	1.23676e+07	1.26254e+07	1.05992e+07	1.08954e+07
Com_182_pos	Hypoxanthine	C5 H4 N4 O	136.039	1.985	137.046	Full match	Full match	Full match	7.2664e+08	931815566	1570485030	1620929641	8.9862e+08	1017313399	9.95481e+08	1638567210	1353366238	1670311225	2023002539	1087726338	1297172886	1701178071	6.7737e+08	913667794	7.9822e+08	1559808477	1385813742	7.68987e+08	1157359228	8.62596e+08	1890706896	5.44126e+08	9.18405e+08	8.51193e+08	3318610790	2038841798	1588128076	1386266994	1521479338	2049249832	1394293759	1098948139	2190359157	1638496850	1625171534	1283183186	9.31565e+08	1552248129	1031757298
Com_1836_pos	PC (18:1e/2:0)	C28 H56 N O7 P	549.381	15.38	550.388	No results	Full match	No results	4.843e+07	6.49042e+07	4.39412e+07	6.72903e+07	2.82712e+07	2.79365e+07	4.98842e+07	3.00385e+07	3.80411e+07	5.33638e+07	7.26267e+07	3.85646e+07	4.19359e+07	6.19057e+07	7.39616e+07	4.84033e+07	3.88553e+07	6.38661e+07	4.95498e+07	6.14601e+07	6.30451e+07	8.09257e+07	1.83066e+07	2.61166e+07	3.45325e+07	7.03207e+07	5.41431e+07	8.54869e+07	2.88647e+07	7.3457e+07	3.02563e+07	4.11771e+07	2.82939e+07	3.7151e+07	4.74232e+07	2.86812e+07	4.97493e+07	2.93641e+07	2.33359e+07	4.27778e+07	3.31504e+07
Com_1842_pos	(2E,4E)-N-[2-(4-hydroxyphenyl)ethyl]dodeca-2,4-dienamide	C20 H29 N O2	315.218	13.378	316.226	Full match	No results	No results	1.76297e+07	1.71425e+07	1.84469e+07	1.77987e+07	9.17962e+06	6.6446e+06	1.23061e+07	1.64014e+07	1.47894e+07	1.64887e+07	2.10293e+07	1.96514e+07	2.02014e+07	1.7116e+07	1.53001e+07	6.88856e+06	1.53054e+07	1.53454e+07	2.13137e+07	1.67912e+07	1.87971e+07	2.15006e+07	9.95926e+06	1.87065e+07	1.92691e+07	1.51437e+07	1.66735e+07	1.65201e+07	2.02841e+07	1.44136e+07	1.64445e+07	1.54647e+07	1.86785e+07	1.55815e+07	1.74179e+07	8.32763e+06	8.46936e+06	1.20049e+07	1.74831e+07	1.19792e+07	1.06285e+07
Com_184_pos	Methyl palmitate	C17 H34 O2	287.283	12.342	288.29	Invalid mass	No results	No results	2.47711e+08	7.5446e+07	1.00776e+08	1.38065e+08	6.42662e+07	7.34577e+07	7.63561e+07	8.68347e+07	6.67154e+07	1.01082e+08	109824280	9.51093e+07	8.79174e+07	9.05735e+07	203714598	5.46444e+07	9.54509e+07	120686738	3.34819e+08	8.73514e+07	1.15377e+08	1.40898e+08	6.02957e+07	9.2476e+07	1.39177e+08	1.9854e+08	1.8821e+08	2.49525e+08	5.91075e+08	3.84454e+08	878565590	6.95257e+08	5.95311e+08	4.94447e+08	5.02876e+08	2.86764e+08	355985152	284814522	1.64631e+08	3027813730	5.62711e+08
Com_1856_pos	O-Phospho-L-serine	C3 H8 N O6 P	185.01	1.251	186.016	No results	No results	Full match	3.47233e+06	3.10024e+06	3.35844e+06	2.54096e+06	1.28005e+06	1.42811e+06	895843	1.78595e+06	3.15508e+06	1.81574e+06	6.00486e+06	1.42935e+06	1.64819e+06	2.55559e+06	3.89704e+06	879845	1.18167e+06	3.16695e+06	1.80255e+06	2.67965e+06	1.77584e+06	2.14646e+06	7.83231e+07	2.33056e+06	1.23754e+06	2.13673e+06	2.11121e+06	3.04844e+06	1.82402e+06	3.29198e+06	2.52997e+06	2.94825e+06	1.25265e+06	1.71659e+06	2.81822e+06	1.89759e+06	2.31835e+06	1.70411e+06	1.29921e+06	1.88012e+06	2.61939e+06
Com_1862_pos	4-(4-nitrophenylazo)aniline	C12 H10 N4 O2	242.077	6.451	243.084	Invalid mass	No results	No results	2.87636e+06	2.8362e+06	2.15544e+06	2.41483e+06	1.46768e+07	1.86784e+07	1.80419e+07	2.09201e+06	3.09989e+07	2.486e+06	3.02774e+06	2.44558e+06	3.29054e+06	2.58476e+06	7.09e+06	1.91188e+07	8.57503e+06	2.20437e+06	2.72907e+06	1.4281e+06	2.652e+06	2.16409e+06	7.8088e+07	2.57446e+06	2.08105e+07	1.21945e+07	1.62395e+06	2.24075e+06	1.84691e+06	1.70521e+06	2.10822e+06	1.91589e+06	1.72522e+06	3.61087e+06	2.37628e+06	1.40338e+07	1.37615e+07	1.0307e+07	3.86204e+06	1.06503e+07	1.30632e+07
Com_187_pos	PC (17:1/17:2)	C42 H78 N O8 P	755.548	16.024	756.555	No results	Full match	No results	1726869946	1004417039	1563468552	1367912389	1258841822	1676146241	2537404127	8.18173e+08	1665309845	1140648922	1950807664	9.59292e+08	1546768721	1573516623	9.96347e+08	1187291067	1200184520	1422751045	1692649955	1265606822	1591807761	8.5284e+08	7.27204e+08	1046743612	1482688014	1515950833	1713631351	1626393390	1628527399	2204897530	1425174053	1584595105	2177465239	1461970571	1692098444	6.17851e+08	1101525291	1018114345	1675623261	8.99575e+08	1004032326
Com_1883_pos	2-Linoleoyl glycerol	C21 H38 O4	336.265	15.233	337.272	Invalid mass	No results	No results	7.98904e+06	6.25478e+06	8.10339e+06	5.82326e+06	3.96828e+07	3.4328e+07	2.15267e+07	1.7467e+06	1.65656e+07	6.79623e+06	7.17847e+06	8.46566e+06	8.02036e+06	5.53966e+06	5.68701e+06	3.19331e+07	3.14664e+07	7.18199e+06	7.32187e+06	8.99092e+06	1.62917e+06	7.1908e+06	3.45272e+07	7.21996e+06	1.53413e+07	6.67667e+06	1.21374e+07	1.11299e+07	1.03283e+07	7.89819e+06	8.75826e+06	7.16431e+06	9.27425e+06	1.38402e+07	6.73364e+06	1.34766e+07	1.83953e+07	1.2326e+07	9.87733e+06	2.04103e+07	1.38373e+07
Com_188_pos	DL-Tryptophan	C11 H12 N2 O2	204.09	6.752	205.098	Full match	Full match	Full match	2407706756	2245854901	2406885778	2945986063	1649420034	1729304226	1662430487	2818661115	1693637616	3498735865	3106061532	3322731204	3857079072	3060291278	2641466488	2008086549	2252916702	2513178783	1504610641	2429996345	2651116574	2873445719	1461233465	3191907484	2767362013	2934930562	1423637625	2915823225	2983364052	2002642282	2266299314	2541695484	2124503002	2655663255	2237115019	1291384151	1251028420	2246257711	2133063867	2178585055	2403684913
Com_1895_pos	Cortisol	C21 H30 O5	362.21	10.956	363.218	Full match	Full match	Full match	8.48725e+07	5.82227e+07	4.00817e+07	4.24229e+07	6.2751e+07	3.96128e+07	6.03706e+07	4.19136e+07	3.98007e+07	9.29685e+07	1.80192e+07	3.10357e+07	3.41292e+07	4.48766e+07	3.60344e+07	3.07341e+07	5.97785e+07	5.11297e+07	4.01879e+07	3.87421e+07	3.2675e+07	3.11087e+07	1.95212e+07	5.22019e+07	4.40588e+07	5.54993e+07	1.78058e+07	5.83498e+07	9.76316e+07	3.2929e+07	3.42221e+07	4.72984e+07	4.89591e+07	1.36658e+08	5.5825e+07	3.98175e+07	2.69327e+07	5.46163e+07	4.94719e+07	4.65754e+07	4.81481e+07
Com_1909_pos	Thromboxane B2	C20 H34 O6	740.473	14.719	741.478	Invalid mass	No results	No results	4.60021e+06	5.09162e+06	5.72111e+06	5.09932e+06	4.42248e+07	6.24194e+07	2.14315e+07	4.19304e+06	2.40751e+07	4.60798e+06	6.79495e+06	5.06517e+06	4.75362e+06	4.41349e+06	4.4321e+06	4.88546e+07	1.32467e+07	7.99335e+06	4.79349e+06	5.72702e+06	6.03788e+06	4.80904e+06	8.59525e+06	4.65356e+06	6.87944e+06	4.45123e+06	5.37254e+06	7.77007e+06	5.43699e+06	4873300	4.51045e+06	5.33335e+06	4.8904e+06	5.14271e+06	4.75161e+06	2.42403e+07	4.30446e+07	5.79805e+06	4.80893e+06	2.00017e+07	13572293
Com_190_pos	Indole-3-acrylic acid	C11 H9 N O2	187.064	6.772	188.071	Full match	No results	Full match	2406018526	2244083775	2405342032	2944118457	1648231006	1728267734	1661566467	2816726703	1691972932	3496513682	3104660795	3321037422	3855349880	3057966667	2639373690	2006496957	2251219352	2510904224	1503406332	2428200226	2649416260	2871603767	1458859918	3189507491	2765427692	2932855466	1779878993	2915142072	2982326850	2115073309	2265351068	2540665317	2123725400	2654526990	2236261062	2.47135e+08	1250536865	2245424727	2132151141	2177419804	2402532513
Com_191_pos	(2E)-3-(3,4-dimethoxyphenyl)prop-2-enoic acid	C11 H12 O4	208.072	7.769	209.079	Invalid mass	No results	No results	1.8976e+07	1.91458e+07	2.0397e+07	1.8408e+07	1218420309	1474202746	9.19398e+08	2.03501e+07	7.90958e+08	2.13195e+07	2.06304e+07	2.12815e+07	2.33883e+07	1.78589e+07	2.00154e+08	2212750573	6.78831e+08	1.97487e+07	2.04328e+07	17372766	1.86297e+07	1.96229e+07	8.2204e+08	2.2325e+07	4.59002e+08	8.57195e+07	1.09062e+07	1.36165e+07	1.41362e+07	1.24878e+07	1.26867e+07	1.39123e+07	1.4706e+07	2.61958e+08	1.53539e+07	8.06741e+08	1773464649	8.85383e+08	3.50135e+08	1130763885	2413422527
Com_1926_pos	PE (20:3/20:4)	C45 H76 N O8 P	789.53	15.921	790.537	No results	Full match	No results	2.56574e+07	5.81007e+07	2.22799e+06	3.22482e+07	3.70502e+07	7.08513e+07	8.59361e+07	5.88888e+07	3.80131e+07	4.24542e+07	4.95925e+07	4.12084e+07	4.06286e+07	5.51659e+07	3.07431e+07	2.72552e+07	2.4459e+07	7.92483e+07	7.50452e+07	2.29553e+07	4.00652e+07	1.82203e+07	2.20069e+07	4.64808e+07	3.45116e+07	3.61095e+07	5.60428e+07	5.21256e+07	4.63135e+07	1.11893e+08	3.80157e+07	5.32532e+06	3.28098e+07	4.05456e+07	5.93737e+07	2.3291e+07	4.4041e+07	2.71458e+07	6.50046e+07	2.00531e+07	3.61623e+07
Com_1929_pos	SM (d15:2/21:1)	C41 H79 N2 O6 P	726.569	15.575	727.576	No results	Full match	No results	3.48704e+07	1.92659e+07	3.70611e+07	2.6127e+07	2.52423e+07	3.5371e+07	1.10348e+07	2.70955e+07	2.36187e+07	2.92397e+07	3.33641e+07	2.56839e+07	4.57686e+07	3.96202e+07	3.61162e+07	27513083	2.05044e+07	2.79766e+07	3.76856e+07	2.38124e+07	2.95581e+07	2.99933e+07	2.09369e+07	4.43204e+07	3.54846e+07	2.25812e+07	4.29379e+07	3.7431e+07	4.52819e+07	4.07055e+07	3.38236e+07	50786200	2.57843e+07	4.15583e+07	4.10287e+07	1.37314e+07	2.78865e+07	3.28683e+07	4.35067e+07	2.67451e+07	2.73881e+07
Com_1934_pos	4-methyl-5-oxo-2-pentyl-2,5-dihydrofuran-3-carboxylic acid	C11 H16 O4	212.105	7.199	213.113	Full match	No results	No results	1.57958e+07	1.63627e+07	1.54116e+07	1.40661e+07	1.65656e+07	1.79297e+07	2.87851e+07	1.252e+07	1.84262e+07	1.65588e+07	1.43965e+07	1.48732e+07	1.57032e+07	1.28923e+07	2.21174e+07	1.47065e+07	1.61241e+07	1.36453e+07	1.52798e+07	1.18163e+07	1.33639e+07	1.39807e+07	7.28377e+07	1.4587e+07	1.46369e+07	1.78583e+07	1.84206e+07	1.96254e+07	2.06496e+07	1.62168e+07	1.62853e+07	1.78998e+07	1.64437e+07	2.17984e+07	1.57463e+07	2.97348e+07	2.10269e+07	2.31495e+07	1.87671e+07	1.77382e+07	2.41097e+07
Com_1974_pos	SM (d14:1/24:0)	C43 H87 N2 O6 P	758.624	15.306	759.631	No results	Invalid mass	No results	4.92969e+06	4.34268e+06	5.08285e+06	3.92816e+06	1.93271e+06	2.30333e+06	3.19141e+06	1.04076e+07	1.52508e+06	3.36407e+06	8.07956e+06	9.78507e+06	4.45446e+06	4.07707e+06	4.22744e+06	1.30718e+06	2.75062e+06	4.36355e+06	3.79669e+06	2.71222e+06	2.99341e+06	1.13906e+08	2.6591e+06	3.96731e+06	2.90239e+06	4.23301e+06	7.92247e+07	7.14259e+07	8.2667e+07	2.78398e+06	8.88676e+06	9.66943e+07	8.08593e+06	2.00251e+06	3.50861e+06	1.43852e+06	3.43425e+06	3.858e+06	8.58751e+07	2.74109e+06	1.63539e+06
Com_1998_pos	PC (17:0/18:4)	C43 H78 N O8 P	767.547	15.963	768.554	No results	Full match	No results	5.07266e+07	6.98672e+07	5.33781e+07	4.19884e+07	5.95408e+07	4.80998e+07	8.45005e+07	6.52937e+07	6.08013e+07	6.16747e+07	6.48548e+07	4.38564e+07	5.0376e+07	5.40426e+07	3.82414e+07	1.94956e+07	2.9781e+07	5.68394e+07	1.07802e+08	4.02592e+07	4.91804e+07	2.60438e+07	2.51715e+07	6.58438e+07	4.17153e+07	4.6774e+07	8.95024e+07	7.60686e+07	6.24746e+07	9.82755e+07	7.44325e+07	6.73329e+07	5.80995e+07	6.37039e+07	7.58313e+07	3.38909e+07	4.7218e+07	4.70029e+07	7.18348e+07	3.44694e+07	4.58172e+07
Com_1_pos	Oleamide	C18 H35 N O	281.272	14.869	282.28	Full match	No results	No results	22746992876	19462109302	20242197743	19430608324	13585059694	14038151578	13676621688	15705138139	14034549431	19604467456	18489576395	20030042202	24356514580	19092465678	18016822250	11193741087	18208599939	17710827277	20160476605	14517273629	17085108967	17052278147	11928397082	20608496921	21586680575	16671743632	21207154936	25109268443	26608057040	17544691214	19468060992	19330131884	30493355103	22695802382	23774223672	11986333328	14293499095	21047635420	26139462151	17932337992	18017449165
Com_2000_pos	Acipimox	C6 H6 N2 O3	154.036	1.252	155.043	Invalid mass	No results	No results	7.43159e+07	7.53568e+07	6.55092e+07	9.48803e+07	5.45714e+07	4.71441e+07	4.99761e+07	7.66198e+07	7.36769e+07	7.83866e+07	8.72011e+07	1.01702e+08	1.11933e+08	8.40266e+07	3.85072e+07	6.8097e+07	5.84431e+07	6.06833e+07	7.63252e+07	6.69626e+07	7.24927e+07	7.2908e+07	3.87505e+07	7.98151e+07	6.76932e+07	4.50317e+07	1.22133e+08	7.02573e+07	5.33188e+07	3.34376e+07	9.7667e+07	7.34382e+07	7.55665e+07	3.31879e+07	5.40792e+07	1.71154e+07	4.53522e+07	3.51545e+07	6.22969e+07	6.64455e+07	4.65115e+07
Com_2002_pos	Prostaglandin K2	C20 H30 O5	332.197	13.659	333.204	Invalid mass	No results	No results	8.15042e+07	6.05293e+07	8.18798e+07	8.23111e+07	4.17512e+07	2.97467e+07	5.64021e+07	6.33271e+07	4.90229e+07	5.67184e+07	5.17601e+07	7.47276e+07	1.04658e+08	1.08607e+08	6.36995e+07	5.30387e+07	4.27044e+07	4.58441e+07	5.35487e+07	5.10107e+07	8.45436e+07	9.3635e+07	5.03914e+07	1.02752e+08	9.32871e+07	8.91241e+07	6.49751e+07	5.20018e+07	5.87959e+07	7.79456e+07	5.10452e+07	6.57044e+07	4.98274e+07	108830322	5.23513e+07	6.16256e+07	5.84158e+07	5.96972e+07	8.23427e+07	3.67044e+07	3.50779e+07
Com_2022_pos	PC (18:3/18:3)	C44 H76 N O8 P	777.531	15.152	778.539	No results	Full match	No results	5.30879e+07	3.02457e+07	3.78206e+07	3.61858e+07	3.09846e+07	5.56033e+07	4.65299e+07	4.0716e+07	2.75217e+07	5.14006e+07	3.6536e+07	4.91723e+07	3.16107e+07	2.74802e+07	2.74904e+07	1.4632e+07	1.88945e+07	4.53937e+07	4.58383e+07	2.04164e+07	3.16297e+07	1.60674e+07	2.73705e+07	3.39931e+07	2.74792e+07	2.88798e+07	5.01818e+07	9.87559e+06	3.35572e+07	1.11961e+08	2.57005e+07	5.97697e+07	3.95825e+07	4.11241e+07	4.66809e+07	1.53918e+07	3.18597e+07	2.57305e+07	5.52632e+07	1.55297e+07	2.81101e+07
Com_2033_pos	N-[methyl(oxo)phenyl-lambda~6~-sulfanylidene]-N'-phenylurea	C14 H14 N2 O2 S	312.029	1.117	313.036	Invalid mass	No results	No results	3.14748e+07	2.84197e+07	3.21134e+07	3.0736e+07	1.58816e+07	1.32699e+07	1.99919e+07	2.01603e+07	2.00379e+07	2.25619e+07	2.86068e+07	2.18013e+07	2.11596e+07	2.78847e+07	2.01407e+07	1.31963e+07	1.22951e+07	3.13997e+07	2.48987e+07	2.81494e+07	2.76097e+07	2.81039e+07	6.62725e+07	2.78722e+07	1.07166e+07	1.84181e+07	2.26946e+07	2.85225e+07	1.51012e+07	4.77209e+07	1.30563e+07	2.3144e+07	2.43863e+07	2.09558e+07	3.07994e+07	2.86614e+07	1.62297e+07	1.6452e+07	1.40357e+07	1.65672e+07	1.39643e+07
Com_2034_pos	N-(1H-benzo[d]imidazol-2-yl)guanidine	C8 H9 N5	175.085	5.906	176.092	Full match	No results	No results	4.68314e+06	4.59622e+06	4.94349e+06	4.782e+06	4.26785e+07	5.16036e+07	6.48959e+07	4.34012e+06	4.00255e+07	4.33692e+06	5.09686e+06	4.57526e+06	4.94179e+06	4.4734e+06	1.92818e+07	4.42983e+07	2.62985e+07	4.47938e+06	4.95078e+06	4.07604e+06	3.48299e+06	4.78299e+06	6.60294e+07	4.85204e+06	1.48838e+07	1.42005e+07	8.10233e+06	6.82268e+06	6.89596e+06	6.05644e+06	6.55665e+06	6.48366e+06	7.43351e+06	1.30896e+07	6.2066e+06	6.75793e+07	5.02124e+07	2.76425e+07	1.12813e+07	3.49948e+07	6.39158e+07
Com_2057_pos	D-3-Phenyllactic acid	C9 H10 O3	166.063	7.342	167.071	No results	No results	Full match	1.54486e+07	1.39913e+07	1.45321e+07	1.51306e+07	1.83328e+07	1.79731e+07	2.04669e+07	1.28301e+07	1.6543e+07	1.59454e+07	1.57261e+07	1.5453e+07	1.73062e+07	1.22623e+07	1.6367e+07	1.49502e+07	1.49201e+07	1.39655e+07	1.41319e+07	1.20539e+07	1.14761e+07	1.27502e+07	6.50384e+07	1.47062e+07	1.57321e+07	1.47088e+07	2.30804e+07	2.26776e+07	2.12295e+07	1.6353e+07	1.84161e+07	1.87851e+07	1.92648e+07	2.14542e+07	1.59171e+07	2.25625e+07	1.9981e+07	2.15123e+07	1.71091e+07	1.80701e+07	2.38154e+07
Com_207_pos	2-hydroxy-6-[(8Z,11Z)-pentadeca-8,11,14-trien-1-yl]benzoic acid	C22 H30 O3	324.205	14.951	325.212	Invalid mass	No results	No results	2994920698	1292470269	9.62232e+08	7.97815e+08	8.30034e+08	7.3905e+08	9.68705e+08	1437344597	6.86014e+08	1510966875	1250407441	7.53611e+08	2211788666	1682508003	1246485844	4.37664e+08	664810066	1174852544	1007482401	1287903491	984612637	8.25729e+08	7.4227e+08	1019570720	1177560179	1060007134	1164006932	1681331948	9.30583e+08	1832900656	1559195114	1242442070	1671750403	1130678817	1195583278	6.9735e+08	1417183824	2400506181	2159495558	8.29313e+08	1584742753
Com_208_pos	2-Hydroxycinnamic acid	C9 H8 O3	164.048	2.094	165.055	Full match	Full match	Full match	1916765400	1462134543	1292625102	1251580830	1092143580	8.10352e+08	1049429987	1616937426	1660684850	1534726829	1451340094	1676693703	1648772008	1620964178	1264738128	1068528090	1337559995	2023815662	1628421359	1703692489	1568475054	1590611360	1841094811	1923931998	8.59215e+08	1187689340	2269666684	2045805164	2184405004	1706501100	2095532020	2249247832	1567932276	1818843262	2066359206	1437884621	1449517927	1920699559	2347261461	1537581705	1612671657
Com_211_pos	PC (16:1/17:2)	C41 H76 N O8 P	703.572	16.232	704.579	No results	Invalid mass	No results	1346686429	2457548035	1826857089	1471793514	1157194959	1352839698	1113879997	1521010480	1084389742	2043576236	1847521023	8.04574e+08	1866910999	1888144943	1677981380	8.74762e+08	1151466749	1711837589	1903123185	8.01134e+08	1080866669	1200267046	1147045816	1929353732	1769487355	1831766718	2136054729	1462583112	2372551506	2251416383	2000717850	1784186884	1965968232	1512014237	1756205441	9.0118e+08	1349185245	1997965841	2089784900	1160497788	1346839123
Com_2127_pos	Testosterone glucuronide	C25 H36 O8	464.24	12.47	465.247	Full match	No results	No results	2.14053e+06	2.15417e+06	2.10971e+06	2.10731e+06	4.89133e+07	3.72205e+07	3.55837e+07	1.94739e+06	4.62543e+07	2.14554e+06	2.14252e+06	2.23413e+06	2.36315e+06	2.08477e+06	4.82341e+06	3.21347e+07	2.20892e+07	2.18848e+06	2.17006e+06	1.84217e+06	1.896e+06	1.95804e+06	1.26132e+06	2.16184e+06	8.37329e+06	5.31858e+06	3.60771e+06	4.01162e+06	4.01918e+06	2.98481e+06	3.51095e+06	3.30646e+06	3.39783e+06	2.87726e+06	2.8613e+06	3.61875e+07	3.88115e+07	2.96908e+06	1.09406e+07	7.22115e+06	4.96787e+06
Com_2147_pos	DLK	C16 H30 N4 O6	374.221	15.038	375.228	Invalid mass	No results	No results	5.7915e+07	2.83569e+07	2.71721e+07	1.48918e+07	2.05105e+07	9.42015e+06	1.60824e+07	4.31069e+07	1.50384e+07	3.1335e+07	4.71908e+07	2.41997e+07	3.5327e+07	1.28295e+07	7.50531e+06	9.65594e+06	1.73352e+07	3.08464e+07	1.81926e+07	2.07043e+07	1.35795e+07	1.66918e+07	6.07843e+07	1.89923e+07	2.80934e+07	2.52437e+07	2.29851e+07	3.15536e+07	1.6567e+07	2.46251e+07	1.25826e+07	2.09867e+07	2.16129e+07	1.49166e+07	1.88276e+07	1.20158e+07	2.72197e+07	5.08937e+07	6.80914e+07	1.22126e+07	2.7345e+07
Com_2153_pos	2-methyl-2,3,4,5-tetrahydro-1,5-benzoxazepin-4-one	C10 H11 N O2	159.069	6.516	160.076	Invalid mass	No results	No results	6.71407e+07	5.66748e+07	7.55343e+07	7.838e+07	4.40589e+07	4.30392e+07	3.84484e+07	6.881e+07	5.96643e+07	9.72658e+07	6.8678e+07	7.83303e+07	3.46929e+07	7.96796e+07	5.88018e+07	4.58795e+07	6.42386e+07	7.62177e+07	5.13715e+07	5.24796e+07	2.35843e+07	6.76841e+07	6.05691e+07	69184740	5.27e+07	6.98369e+07	5.24413e+07	7.42331e+07	8.9057e+07	5.1098e+07	6.91611e+07	3.19176e+07	5.84944e+07	7.79092e+07	6.21799e+07	3.9478e+07	3.85672e+07	6.57501e+07	5.76944e+07	5.55348e+07	5.76174e+07
Com_2203_pos	Gly-Val	C7 H14 N2 O3	174.101	2.359	175.108	No results	Full match	Full match	1.78664e+07	6.46138e+07	1.62401e+07	3.3228e+07	3.73044e+07	6.51428e+07	1.7445e+07	6.68357e+07	1.66644e+07	4.80654e+07	1.74046e+07	6.24175e+07	6.26896e+07	1.63353e+07	4.97741e+06	5.66022e+07	3.2801e+07	1.76779e+07	1.47399e+07	3.13969e+07	1.24738e+07	1.91861e+07	1.22595e+06	8.81291e+07	3.95338e+06	6.7328e+06	4.96243e+06	2.53782e+07	7.1572e+07	1.37917e+07	4.7396e+07	4.01959e+07	9.27568e+07	7.8685e+07	3.65643e+07	1.25458e+07	3.01918e+07	5.52915e+07	8.34527e+07	4.39116e+07	6.71556e+07
Com_2216_pos	Dihomo-γ-linolenic acid ethyl ester	C22 H38 O2	340.298	15.29	341.306	Invalid mass	No results	No results	3.18112e+07	3.18017e+07	1.43779e+07	1.05534e+07	9.82424e+06	1.0453e+07	9.3378e+06	1.24806e+07	1.11539e+07	1.04722e+07	1.39373e+07	4.64611e+07	3.88732e+07	1.20392e+07	8.76114e+07	8.21101e+06	1.24031e+07	1.47525e+07	9.45652e+06	3.46067e+07	9.65226e+06	1.20529e+07	2.03356e+07	2.68071e+07	3.06808e+07	2.7915e+07	1.77778e+07	1.76287e+07	5.09803e+07	1.95513e+07	1.87167e+07	1.93816e+07	5.07959e+07	3.5166e+07	1.57873e+07	1.01539e+07	1.06589e+07	4.72513e+07	7.58826e+07	11474494	1.15946e+07
Com_2227_pos	α-Aspartylphenylalanine	C13 H16 N2 O5	280.107	6.802	281.114	Full match	Full match	Full match	4.33321e+06	8.61252e+07	5.04596e+06	1.13493e+07	9.46117e+06	8.40906e+06	3.7212e+06	1.50619e+07	3.09838e+07	9.77975e+06	2.02089e+07	1.09861e+07	1.04255e+07	6.08802e+06	2.68167e+06	62409453	3.71826e+06	4.17982e+06	3.5459e+06	7.07865e+06	9.05361e+06	5.53066e+06	1.03654e+06	2.1996e+07	1.84424e+07	1.21875e+06	1.30441e+07	8.3374e+06	2.72354e+07	5.67638e+06	5.77761e+07	8.51057e+06	2.63191e+07	1.66917e+07	8.56174e+06	1.7319e+06	1.0322e+07	3.87231e+06	2.14912e+07	7.20962e+06	2.63022e+07
Com_2272_pos	Stearoyl Ethanolamide	C20 H41 N O2	349.296	14.285	350.304	Invalid mass	No results	No results	7.32491e+07	7.58621e+07	7.19703e+07	8.8572e+07	4.8606e+07	4.89513e+07	5.21968e+07	6.54276e+07	5.62277e+07	7.85112e+07	7.23058e+07	7.57011e+07	8.71876e+07	7.97215e+07	6.51129e+07	5.02274e+07	6.81508e+07	7.7368e+07	8.43619e+07	6.76037e+07	6.78403e+07	7.83104e+07	4.47545e+07	8.1938e+07	7.77348e+07	7.27507e+07	3.03357e+07	3.60971e+07	3.65915e+07	3.26405e+07	4.22306e+07	4.43761e+07	4.47442e+07	5.00824e+07	5.04431e+07	2.94173e+07	4.0364e+07	5.33634e+07	6.17563e+07	4.49548e+07	4.84235e+07
Com_227_pos	2-phenyl-2,4,6,7-tetrahydrothiino[4,3-c]pyrazol-3-ol	C12 H12 N2 O S	232.069	10.131	233.077	Invalid mass	No results	No results	1.5026e+06	1.52808e+06	1.56159e+06	1.5195e+06	2.43836e+08	3.85468e+08	4.2904e+08	1.40902e+06	2.36208e+08	1.61474e+06	1.55332e+06	5.32771e+06	1.77176e+06	1.46174e+06	1.41927e+08	3.54618e+08	1.46782e+08	5.66988e+06	1.64178e+06	1.35151e+06	1.41732e+06	1.49166e+06	1629737424	5.66674e+06	2.46116e+07	9.75988e+07	1.82385e+06	2.11543e+06	2.11199e+06	1.64633e+06	1.68891e+06	3.87415e+06	1.90508e+06	6.90216e+07	2.23688e+06	5.88957e+08	3.96192e+08	1.27588e+08	3.99692e+07	309430705	3.99461e+08
Com_230_pos	Acetyl-L-carnitine	C9 H17 N O4	203.116	1.57	204.124	Full match	Full match	Full match	2642057968	2161753632	1133747596	1098015818	9.89624e+08	734272810	6.90575e+08	2032664595	979944209	1969615101	1461601008	2009108496	2318509611	1668111773	1051846477	800915922	1142994058	1950319778	1299655930	1454488377	1270410793	1148034843	9.10872e+08	1677561807	2074912135	1500358979	6.20165e+08	1245501865	906034730	1189953776	1490613349	1326297981	1143880242	1070680366	1193805507	1053551348	1404548577	2474814270	2180759298	1123543839	1260953197
Com_232_pos	Stearamide	C18 H37 N O	283.288	15.433	284.295	Full match	No results	No results	3.31592e+08	2.73288e+08	2.84115e+08	2.83108e+08	212382106	1.825e+08	1.76828e+08	2.49755e+08	2.10283e+08	3.08798e+08	264241486	3.1224e+08	3.66971e+08	3.01713e+08	3.06115e+08	1.66871e+08	2.93749e+08	3.03258e+08	2.96277e+08	3.13406e+08	307287524	3.09357e+08	1.91746e+08	3.44981e+08	3.38626e+08	2.5724e+08	2.68142e+08	2.6469e+08	2.76686e+08	1.69741e+08	1.80846e+08	2.02882e+08	309945258	2.48201e+08	2.26025e+08	1.45032e+08	1.57598e+08	2.53797e+08	2.84671e+08	2.04085e+08	218602573
Com_2346_pos	ILK	C18 H36 N4 O4	354.257	13.231	355.264	Invalid mass	No results	No results	8.34801e+06	7.43717e+06	1.84131e+07	8.44328e+06	7.34511e+06	2.86405e+06	5.16552e+06	4.81172e+06	5.1097e+06	4.5418e+06	8.89348e+06	9.14802e+06	5.95337e+06	7.74596e+06	1.94285e+07	9.29287e+06	9.61666e+06	1.7709e+07	5.00899e+06	2.17137e+07	8.44998e+06	8.15126e+06	3.55989e+07	9.5241e+06	9.01405e+06	9.88878e+06	6.66168e+06	7.77146e+06	1.23363e+07	7.56828e+06	1.33084e+07	5.3437e+06	9.2149e+06	2.77045e+07	8.16953e+06	1.38199e+07	7.29202e+06	5.77614e+06	7.84354e+06	1.04089e+07	4.79248e+06
Com_2349_pos	PC (18:5e/4:0)	C30 H52 N O7 P	569.349	14.624	570.358	No results	Full match	No results	2.34916e+07	4.32182e+07	2.39404e+07	3.0298e+07	8.7351e+06	1.05009e+07	9.25295e+06	3.53963e+07	2.66718e+07	2.38406e+07	4.00328e+07	3.37178e+07	1.83991e+07	1.59429e+07	1.38402e+07	2.8885e+07	2.08118e+07	2.46026e+07	2.30789e+07	4.54549e+07	2.54231e+07	3.63415e+07	1.7005e+07	2.245e+07	1.34948e+07	8.10225e+07	4.21033e+06	2.07623e+07	1.83573e+07	2.97275e+07	2.08005e+07	4.74715e+07	1.47434e+07	1.27943e+07	2.785e+07	1.53163e+07	2.26624e+07	2.81031e+07	1.95036e+07	3.7394e+07	1.76819e+07
Com_2357_pos	Propionylcarnitine	C10 H19 N O4	217.132	2.646	218.139	Full match	Full match	Full match	25074467	7.00268e+07	6.33431e+07	6.31167e+07	3.10036e+07	1.96176e+07	1.88995e+07	3.51369e+07	4.48851e+07	3.04607e+07	5.5276e+07	5.5158e+07	5.97556e+07	3.00436e+07	3.41655e+07	2.52615e+07	3.87629e+07	8.82355e+07	5.382e+07	4.66243e+07	4.65665e+07	3.44388e+07	5.07085e+07	7.91333e+07	3.92057e+07	4.1116e+07	5.89192e+07	3.05776e+07	3.88241e+07	3.89571e+07	3.17783e+07	3.38725e+07	2.424e+07	2.7539e+07	3.30944e+07	2.18946e+07	3.00786e+07	2.59073e+07	3.498e+07	3.58267e+07	3.2051e+07
Com_2358_pos	Traumatic acid	C12 H20 O4	228.136	11.501	229.143	No results	No results	Full match	2.87988e+06	4.53161e+06	4.37844e+06	4.09052e+06	3.70071e+07	4.3729e+07	2.66578e+07	4.52168e+06	2.86892e+07	4.16893e+06	4.38051e+06	4.11641e+06	4.99487e+06	3.41412e+06	7.02849e+06	5.76498e+07	2.73138e+07	5.12653e+06	4.0355e+06	3.88859e+06	3.99406e+06	4.63672e+06	1.17604e+07	4.76503e+06	2.25827e+07	6.28992e+06	4.60277e+06	5.41741e+06	4.95035e+06	4.46394e+06	4.08006e+06	3.77448e+06	4.26536e+06	6.3729e+06	4.23132e+06	2.7214e+07	4.61639e+07	1.53333e+07	9.41347e+06	3.79269e+07	3.2073e+07
Com_237_pos	1-Palmitoylglycerol	C19 H38 O4	330.278	14.84	331.285	Full match	No results	Full match	9.93838e+08	7.91682e+08	5.30105e+08	4.54752e+08	1176737764	6.13944e+08	4.27124e+08	8.87673e+08	5.00677e+08	5.49362e+08	9.54359e+08	1343677590	1116170750	621147959	1469952066	327721869	6.07276e+08	8.18989e+08	5.16922e+08	2388251823	4.57525e+08	490514274	3.9718e+08	8.10809e+08	7.84913e+08	6.17676e+08	476917786	4.68732e+08	1248170194	3.75589e+08	5.33589e+08	1119555650	9.96477e+08	1187015539	4.71364e+08	2.7959e+08	3.19124e+08	1418794666	1755460071	322931562	6.93056e+08
Com_238_pos	Lysopc 18:2	C26 H50 N O7 P	519.335	14.775	520.343	No results	No results	Full match	3.33183e+08	9.27296e+08	4.60959e+08	1455956002	4.97432e+08	4.82832e+08	2.67766e+08	6.7286e+08	1062599490	5.52716e+08	6.48161e+08	2470514379	1661809262	5.1369e+08	3.7703e+08	1730509707	658322780	7.6243e+08	5.57392e+08	1690264333	2124094309	8.2647e+08	1.3864e+08	1154918494	1224492479	6.14069e+08	6.5019e+08	5.93072e+08	7.01627e+08	1505043153	6.87371e+08	8.37847e+08	8.96865e+08	6.05707e+08	576629781	9.60792e+08	8.0112e+08	4.15179e+08	1217538271	7.07749e+08	3.73265e+08
Com_241_pos	DL-Carnitine	C7 H15 N O3	161.106	1.212	162.113	Full match	Full match	Full match	7.93564e+08	1995098152	1065855354	1566823450	8.55287e+08	6.43071e+08	7.89787e+08	1439528124	1204339313	1338819748	1565088484	2195535365	2083955011	1173205002	8.01093e+08	1080739524	1453787933	1923814327	1398592051	1616652250	1919357441	1092076742	9.68619e+08	2050838128	1872542736	9.4357e+08	2213792582	1620956760	2567478998	1754296882	2083026188	1917614371	2077761337	1377504157	1653499255	1391213601	1492222629	1588340789	2690819095	2270998080	1481930080
Com_2431_pos	SM (d19:2/13:0)	C37 H73 N2 O6 P	672.522	16.745	673.529	No results	Full match	No results	4.90084e+07	6.9581e+07	4.36634e+07	6.09977e+07	4.50632e+07	4.02367e+07	2.60302e+07	3.78307e+07	4.06541e+07	3.85391e+07	3.67772e+07	4.74804e+07	2.731e+07	3.47578e+07	2.78508e+07	2.56524e+07	3.02226e+07	4.02016e+07	3.33685e+07	3.63625e+07	4.98189e+07	7.15797e+07	2.44699e+07	6.45819e+07	35780272	3.55939e+07	1.75738e+07	4.37226e+07	9.24002e+07	3.67207e+07	8.18167e+07	6.42137e+07	4.07707e+07	5.08954e+07	2.47092e+07	3.00245e+07	2.99296e+07	5.37361e+07	4.86806e+07	3.97742e+07	3.5154e+07
Com_2438_pos	2-[1-(4-isobutylphenyl)ethyl]-5-(3-nitrophenyl)-1,3,4-oxadiazole	C20 H21 N3 O3	351.159	8.773	352.167	Full match	No results	No results	4.76001e+07	4.67505e+07	1.63496e+07	3.70709e+07	3.22687e+07	2.33963e+07	1.1759e+07	6.83941e+07	1.74366e+07	3.42544e+07	1.34932e+07	3.07264e+07	5.99759e+07	2.82208e+07	2.89043e+06	2.89752e+07	1.47161e+07	2.13028e+07	1.90031e+07	52947945	1.59125e+07	1.72879e+07	461351	2.44972e+07	2.50849e+07	5.5786e+06	2.59248e+07	3.9791e+07	5.31164e+07	1.50119e+07	5.35109e+07	3.01802e+07	9.18907e+07	4.18052e+07	2.14672e+07	7.57894e+06	2.96826e+07	83017606	1.88022e+07	3.35872e+07	1.50328e+07
Com_2454_pos	PC (19:2/18:3)	C45 H80 N O8 P	1587.12	16.789	794.566	No results	Invalid mass	No results	4.88648e+07	5.56825e+07	5.58882e+07	5.23222e+07	4.05074e+07	4.55765e+07	4.60855e+07	6.59148e+07	5.09589e+07	6.48399e+07	6.2531e+07	6.11493e+07	6.19483e+07	7.34869e+07	6.96471e+07	4.11976e+07	6.80394e+07	6.02968e+07	5.59507e+07	5.23324e+07	6.36985e+07	6.78157e+07	4.87865e+07	6.692e+07	5.34434e+07	5.10747e+07	5.16604e+07	6.47713e+07	5.68272e+07	5.07253e+07	5.84458e+07	6.57901e+07	7.14961e+07	7.43375e+07	7.34658e+07	4.14153e+07	3.23474e+07	6.09371e+07	5.80089e+07	5.27034e+07	6.44181e+07
Com_2459_pos	D-δ-Tocopherol	C27 H46 O2	402.351	15.228	403.358	Full match	No results	Full match	3.47042e+07	4.34172e+07	5.29555e+07	5.72124e+07	1.8825e+07	1.80862e+07	1.86941e+07	4.49841e+07	3.89919e+07	5.68297e+07	5.75386e+07	3.16939e+07	6.4403e+07	5.5625e+07	4.35805e+07	5.30501e+07	4.2519e+07	3.99447e+07	4.24326e+07	4.59366e+07	4.87299e+07	6.10159e+07	3.31087e+07	6.42321e+07	5.13926e+07	4.89601e+07	6.28605e+07	4.38665e+07	4.35564e+07	3.87426e+07	5.47083e+07	3.09376e+07	6.7989e+07	4.68527e+07	4.85073e+07	3.59728e+07	5.53316e+07	4.07298e+07	5.88127e+07	2.82161e+07	2.65057e+07
Com_2462_pos	N-(6-methoxypyridin-3-yl)thiophene-2-carboxamide	C11 H10 N2 O2 S	234.05	1.146	235.057	Invalid mass	No results	No results	4.18684e+07	3.14888e+07	2.92584e+07	3.65539e+07	3.48007e+07	3.27007e+07	3.59608e+07	3.92536e+07	2.77382e+07	4.89069e+07	5.02352e+07	3.88699e+07	4.46161e+07	4.10672e+07	4.89805e+07	2.48045e+07	4.04758e+07	2.96891e+07	4.77632e+07	3.68337e+07	3.50091e+07	4.04297e+07	4.84391e+07	5.19075e+07	2.96378e+07	3.66123e+07	3.67865e+07	3.67936e+07	4.52899e+07	2.82017e+07	3.90508e+07	4.13981e+07	3.93392e+07	3.88162e+07	3.12373e+07	2.36142e+07	2.65678e+07	3.37528e+07	4.4812e+07	2.90303e+07	4.39613e+07
Com_246_pos	PC (14:1e/21:2)	C43 H82 N O7 P	755.584	16.54	756.591	No results	Full match	No results	1949907755	1972404683	1809459087	1477871685	1095850382	1455145140	1890731437	2171311875	1150824523	936549	1832967254	1558709448	1291815879	1563187894	1742753922	1027558678	1138350136	1341247069	2077192468	1584266155	1917659348	1865709916	8.69379e+08	1612941398	1435568972	1950127891	9.78043e+08	1010303047	9.50849e+08	7.08289e+08	2028128762	1049681956	1224432357	1286357913	1913158505	1133774397	7.891e+08	1224364367	7.49212e+08	1355108751	619014549
Com_2470_pos	morphine-d3	C17 H16 [2]H3 N O3	288.156	8.449	289.163	Full match	No results	No results	6.00805e+07	5.34991e+07	4.4627e+07	6.85355e+07	3.18383e+07	3.48352e+07	3.54428e+07	3.78458e+07	3.35612e+07	4.25133e+07	4.03957e+07	3.28949e+07	3.99227e+07	4.9515e+07	4.51273e+07	2.83711e+07	3.17638e+07	4.71115e+07	4.12848e+07	3.00917e+07	4.63e+07	4.06136e+07	4.81281e+07	4.22332e+07	2.70562e+07	4.14019e+07	4.30499e+07	4.36076e+07	3.17085e+07	3.92141e+07	3.33902e+07	3.36243e+07	3.31366e+07	3.0297e+07	3.46945e+07	2.96147e+07	3.32766e+07	4.00453e+07	3.07849e+07	2.87004e+07	3.95293e+07
Com_2497_pos	PC (18:0e/16:3)	C42 H80 N O7 P	741.568	14.653	742.575	No results	Full match	No results	1.85715e+07	2.05054e+07	2.52129e+07	3.40925e+07	1.43336e+07	1.53376e+07	2.32362e+07	2.00958e+07	2.45082e+07	2.38611e+07	2.28158e+07	2.92566e+07	2.97368e+07	2.94502e+07	2.40372e+07	1.77613e+07	2.37339e+07	2.89911e+07	3.07377e+07	1.79062e+07	1.97337e+07	2.33162e+07	1.2784e+07	2.67502e+07	4.03542e+07	2.69527e+07	3.40811e+07	3.13501e+07	4.07103e+07	4.87007e+07	3.4263e+07	3.64483e+07	4.13465e+07	3.04192e+07	2.86745e+07	2.44463e+07	1.67085e+07	1.54473e+07	3.14596e+07	2.29141e+07	2.68269e+07
Com_2519_pos	2-[3-methyl-2-(methylimino)-4-oxo-1,3-thiazolan-5-yl]acetic acid	C7 H10 N2 O3 S	224.02	5.369	225.027	Invalid mass	No results	No results	1.55362e+06	1.33539e+06	1.3743e+06	1.33013e+06	1.4225e+07	1.36853e+07	2.42543e+07	1.25554e+06	1.33487e+07	1.55761e+06	1.4152e+06	1.61577e+06	1.43768e+06	1.34404e+06	7.59991e+06	1.44631e+07	8.38047e+06	1.41836e+06	1.46562e+06	1.23265e+06	1.40577e+06	1.29881e+06	4.65326e+07	1.37604e+06	5.59354e+06	6.01529e+06	1.40472e+06	1.70201e+06	1.73696e+06	1.49675e+06	1.60692e+06	1.67043e+06	1.53743e+06	3.49384e+06	1.49941e+06	1.72426e+07	1.44723e+07	7.6085e+06	3.26465e+06	8.70555e+06	1.3425e+07
Com_2523_pos	Androsterone	C19 H30 O2	290.223	15.172	603.435	No results	No results	Full match	7.25641e+07	3.07992e+07	2.34643e+07	2.1086e+07	23609921	1.6887e+07	1.79741e+07	4.00644e+07	2.16578e+07	3.87008e+07	2.79459e+07	2.83722e+07	5.74698e+07	4.00596e+07	3.97028e+07	1.24452e+07	1.68431e+07	3.0528e+07	1.72656e+07	5.46728e+07	2.83821e+07	2.5923e+07	4.64663e+07	3.05781e+07	3.2797e+07	3.34598e+07	1.3186e+07	1.77062e+07	1.22593e+07	2.55298e+07	18443411	2.25005e+07	2.33005e+07	1.739e+07	1.56449e+07	1.13862e+07	2.34696e+07	4.42212e+07	4.40838e+07	1.19436e+07	3.26214e+07
Com_252_pos	Proline	C5 H9 N O2	115.064	1.333	116.071	Full match	Full match	Full match	8.8668e+08	6.69303e+08	8.78706e+08	1054236748	7.63612e+08	5.0308e+08	6.03908e+08	7.28932e+08	8.83294e+08	7.15392e+08	9.73851e+08	8.42899e+08	1207327495	8.79237e+08	9.97774e+08	7.09085e+08	7.48723e+08	9.37451e+08	918019819	1041428889	8.88274e+08	8.05139e+08	1506082656	1097651690	7.19942e+08	1225696548	1126502549	1040473699	1085810268	9.71068e+08	645211286	8.1184e+08	8.74574e+08	9.34802e+08	8.03716e+08	6.67723e+08	6.87247e+08	7.39993e+08	7.8862e+08	7.05528e+08	8.05461e+08
Com_2538_pos	(2β,3β,9ξ,17ξ,22R)-2,3,14,20,22-Pentahydroxyergost-7-en-6-one	C28 H46 O6	478.328	15.114	479.335	Full match	No results	No results	4.8564e+06	4.20619e+06	5.05522e+06	6.19386e+06	1.60423e+07	1.31331e+07	1.23837e+07	4.6601e+06	1.10905e+07	4.93748e+06	3.85609e+06	4.22905e+06	3.75346e+06	5.69729e+06	4.78434e+06	1.69838e+07	6.84526e+06	5.23755e+06	5.19656e+06	5.03675e+06	6.33618e+06	6.43834e+06	1.40152e+07	3.33612e+06	4.79072e+06	4.57941e+06	6.135e+06	5.37432e+06	4.65759e+06	5.59585e+06	4.35717e+06	5.48197e+06	4.4437e+06	6.26152e+06	5.3686e+06	1.65862e+07	1.9229e+07	4.97029e+06	5.9161e+06	1.29263e+07	1.00787e+07
Com_2546_pos	HPK	C17 H28 N6 O4	380.218	13.884	381.225	Full match	No results	No results	1.60309e+07	1.43665e+07	3.10612e+07	7.31584e+07	9.18331e+06	7.37863e+06	4.65365e+06	2.37178e+07	5.57586e+06	3.16697e+07	1.91424e+07	1.07329e+07	1.54084e+07	3.72209e+07	4.16892e+06	7.86023e+06	5.66409e+06	1.27773e+07	2.24943e+07	2.1917e+07	2.74758e+07	2.69353e+07	6.47026e+06	7.56842e+06	8.54066e+06	9.52036e+06	2.44727e+07	2.45049e+07	8.14015e+06	4.89761e+07	7.04122e+06	1.45052e+07	9.91363e+06	5.06809e+06	1.20207e+07	5.87334e+06	8.11929e+06	7.10021e+06	6.17521e+06	8.29546e+06	7.27705e+06
Com_254_pos	PC (18:4e/2:0)	C28 H50 N O7 P	543.333	14.461	544.338	No results	Full match	Full match	2212803417	2275506494	960061993	1330158766	5.77063e+08	6.48201e+08	5.2272e+08	1702680046	1176017747	9.44672e+08	1336018195	1444957677	1131277268	9.53096e+08	5.25746e+08	1121462966	8.7377e+08	1353430629	1219122017	1552232920	1248796130	1067616093	4.22773e+08	1030776727	8.96682e+08	1591239903	1122099204	1180444426	8.69413e+08	9.47961e+08	6.2801e+08	1305129823	563623768	6.78829e+08	1053327826	6.78687e+08	8.66702e+08	8.93584e+08	6.75387e+08	5.98775e+08	522029371
Com_2555_pos	7Z, 10Z, 13Z, 16Z, 19Z-docosapentaenoic acid	C22 H34 O2	330.254	15.408	331.262	No results	No results	Full match	7.37556e+07	4.6532e+07	6.92552e+06	2.11941e+07	2.05856e+07	1.71185e+07	1.60512e+07	4.65767e+07	1.78661e+07	3.22633e+07	1.87663e+07	2.88087e+07	3.88284e+07	2.48379e+07	2.44125e+07	1.18316e+07	2.20338e+07	2.63857e+07	1.85541e+07	3.07961e+07	2.57517e+07	1.9888e+07	4.20958e+07	8.37817e+06	3.52864e+07	2.64066e+07	2.24911e+07	3.16686e+07	1.72182e+07	2.75263e+07	2.72636e+07	2.03118e+07	2.57601e+07	2.20239e+07	7.53879e+06	1.38261e+07	3.02316e+07	5.72973e+07	4.76342e+07	1.56565e+07	2.58593e+07
Com_255_pos	Betaine	C5 H11 N O2	117.079	1.382	118.087	Full match	Full match	Full match	1137518700	1312576389	1084646855	1220367046	6.32156e+08	6.27672e+08	654992074	1164489290	1547670460	9.0133e+08	1020620310	2032471438	1.67695e+08	2361393486	9.29907e+08	1227609691	8.55315e+08	6.95285e+08	1546651089	1136782101	1610185610	1956163835	1000130825	1462350712	1049589527	1237496197	2188065104	1427341795	1045159651	1037633975	1133596640	1177842808	9.32494e+08	6.37041e+08	1095846757	9.28371e+08	1182040963	8.838e+08	1830990063	1796246394	1022418795
Com_256_pos	D-(+)-Proline	C5 H9 N O2	115.064	1.44	116.071	Full match	Full match	Full match	7.75883e+08	5.67404e+08	7.56736e+08	9.73981e+08	6.19165e+08	4.30562e+08	5.45676e+08	7.72348e+08	6.64234e+08	6.16645e+08	8.46879e+08	7.51566e+08	1047192799	681320074	7.30076e+08	6.17833e+08	5.83895e+08	1024974682	7.85055e+08	9.0438e+08	6.23156e+08	6.97709e+08	1468113060	9.49397e+08	4.77569e+08	9.00221e+08	1358113245	1049214725	1087119430	9.8367e+08	6.36872e+08	798720525	8.54257e+08	9.46514e+08	7.09271e+08	5.89555e+08	6.20306e+08	6.94121e+08	7.33719e+08	6.75026e+08	7.84591e+08
Com_2590_pos	Indole-3-lactic acid	C11 H11 N O3	205.074	8.934	206.082	Full match	Full match	Full match	2.95499e+07	4.90394e+07	4.50223e+07	6.13823e+07	3.25732e+07	2.80145e+07	3.15503e+07	3.65437e+07	2.86277e+07	4.5908e+07	6.18692e+07	4.1295e+07	6.27136e+07	4.3945e+07	5.98158e+07	2.55356e+07	4.26315e+07	3.60211e+07	5.06695e+07	3.16451e+07	3.53869e+07	5.06314e+07	4.41767e+07	4.74512e+07	3.5165e+07	3.91481e+07	5.22117e+07	4.62245e+07	4.11735e+07	6.57522e+07	4.42509e+07	6.50818e+07	3.88581e+07	4.53111e+07	3.43125e+07	2.3315e+07	2.44751e+07	5.64547e+07	3.95956e+07	2.78327e+07	4.25252e+07
Com_2621_pos	pentane-1,2,3,4,5-pentol	C5 H12 O5	174.051	1.258	175.058	Invalid mass	No results	No results	1.16519e+07	1.61879e+07	1.66397e+07	1.12757e+07	1.33405e+07	1.5688e+07	7880273	1.56656e+07	1.3188e+07	8.97073e+06	1.60005e+07	1.17135e+07	3.05023e+07	1.55323e+07	1.96202e+07	7.75205e+06	1.36656e+07	1.42015e+07	1.11595e+07	1.95041e+07	1.1951e+07	1.58107e+07	1.71662e+07	1.57495e+07	1.76421e+07	8.20202e+06	5.66188e+07	2.03085e+07	1.05837e+07	8.45722e+06	2.07802e+07	2.15644e+07	1.78375e+07	2.01042e+07	7.99162e+06	1.14252e+07	8.01527e+06	1.26147e+07	1.9345e+07	1.4934e+07	9.24002e+06
Com_263_pos	SM (d22:2/12:0)	C39 H77 N2 O6 P	700.553	15.297	701.56	No results	Full match	No results	1942706722	1902052317	1437239483	1144256308	9.13462e+08	1081476642	9.35207e+08	1249568957	8.45688e+08	1436821532	1171861967	8.9894e+08	1411054819	1736209569	1265850928	7.49482e+08	8.61632e+08	1193294608	1148181612	8.11718e+08	1214474730	1294703786	1319070238	1455230903	9.99285e+08	8.75243e+08	1921946648	1541707259	1822666617	2398623215	1869494152	1943059227	1725681567	1480024050	2413611944	5.80692e+08	1280619378	1783750578	1689892521	1116763159	1035263915
Com_2664_pos	6beta-Naltrexol-d3	C20 H22 [2]H3 N O4	346.198	9.452	347.205	Full match	No results	No results	4.02971e+07	3.59614e+07	3.1007e+07	6.70345e+07	1.58837e+07	2.29278e+07	2.4056e+07	2.8803e+07	1.93886e+07	3.01648e+07	2.96401e+07	2.51242e+07	2.68451e+07	3.03873e+07	2.28031e+07	1.89621e+07	2.25217e+07	3.17822e+07	28265158	2.79054e+07	3.08114e+07	3.58914e+07	2.26034e+07	2.98862e+07	2.30566e+07	2.20079e+07	3.04562e+07	2.95155e+07	2.2797e+07	4.19324e+07	2.33795e+07	2.32358e+07	2.27128e+07	2.51278e+07	2.43406e+07	1.95781e+07	1.95845e+07	2.31112e+07	2.26949e+07	1.84476e+07	2.29409e+07
Com_2667_pos	Terephthalic Acid	C8 H6 O4	166.027	7.122	167.035	No results	No results	Full match	1.60171e+07	2.63436e+07	3.97259e+07	2.49873e+07	1.21148e+07	9.05883e+06	8.41124e+06	1.39732e+07	1.55696e+07	4.95421e+07	1.13971e+07	3.38913e+07	1.55093e+07	6.97304e+06	1.96073e+07	3.19477e+07	4.10845e+07	1.27055e+07	7.45157e+07	2.88388e+07	3.2914e+07	1.20571e+07	2.85767e+07	2.64672e+07	2.3902e+07	9.59796e+06	1.52876e+07	3.5534e+07	2.19664e+07	4.98044e+06	5.56184e+07	1.73599e+07	2.56911e+07	2.28588e+07	1.6988e+07	2.27422e+07	6.36136e+06	10910473	2.63938e+07	3.79072e+07	1.73349e+07
Com_26_pos	octadec-9-ynoic acid	C18 H32 O2	262.23	14.566	263.237	Invalid mass	No results	No results	1631752559	1599795927	1485267586	1451364780	1199096723	1250948930	1079797965	1379951853	1061689952	1490070782	1588068442	1653168015	1723912832	1644381717	1426321509	9.35848e+08	1517635592	1371183285	1487876397	1749167384	1698363022	1574739809	9.57767e+08	1616784425	1515496271	1262414647	2314599985	2083602251	1573435482	1360463835	1471717185	1633615991	2465572199	1937404624	1939914551	8.92576e+08	1004511093	1949532564	1899729945	1668364353	1428276573
Com_2738_pos	PC (14:1e/24:4)	C46 H84 N O7 P	793.596	14.91	794.604	No results	Full match	No results	4.22043e+07	2.61632e+07	2.50086e+07	2.42725e+07	1.78819e+07	2.66523e+07	2.86185e+07	2.6645e+07	2.51347e+07	3.03179e+07	3.15842e+07	3.47717e+07	6.51813e+07	5.39801e+07	1.87967e+06	1.76673e+07	2.74809e+07	2.28202e+07	2.75995e+07	2.56196e+07	2.21905e+07	2.88152e+06	2.00667e+07	2.97758e+07	3.75902e+07	6.85173e+06	4.85422e+07	4.59409e+07	5.16558e+07	3.8611e+07	3.21365e+07	5.42721e+07	4.49543e+07	3.52887e+07	3.85969e+07	1.93491e+07	2.51486e+07	1.89985e+07	4.48026e+07	2.45454e+07	5.65991e+07
Com_274_pos	17α-Methyl-androstan-3-hydroxyimine-17β-ol	C20 H33 N O2	319.249	13.692	320.256	Invalid mass	No results	No results	1.40179e+08	1.28945e+08	1.50501e+08	1.20414e+08	8.04396e+07	9.37334e+07	8.63483e+07	1.20931e+08	7.90114e+07	1.3592e+08	1.22308e+08	1.23304e+08	1.4971e+08	1.2514e+08	1.28398e+08	8.86287e+07	1.29558e+08	136510458	1.48127e+08	9.98439e+07	1.1118e+08	132830893	7.72854e+07	150558139	1.28354e+08	1.25561e+08	1.30575e+08	1.30499e+08	1.53852e+08	1.14656e+08	124680524	1.17385e+08	1.52031e+08	1.2393e+08	163284598	7.69096e+07	9.53088e+07	1.12526e+08	1.30935e+08	9.14836e+07	9.94196e+07
Com_2759_pos	PC (18:2e/22:4)	C48 H86 N O7 P	819.615	14.927	820.623	No results	Full match	No results	2.0647e+07	1.28513e+07	8.54039e+06	1.28541e+07	8.52049e+06	1.09597e+07	1.61988e+07	1.17923e+07	1.5172e+07	1.36465e+07	1.51815e+07	2.24953e+07	1.29039e+07	1.6605e+07	1.66287e+07	8.35368e+06	9.45725e+06	1.09234e+07	1.98869e+07	9.4682e+06	1.10379e+07	1.10674e+07	9.10522e+06	9.28553e+06	1.39194e+07	1.52387e+07	1.078e+07	1.70214e+07	2.66672e+07	2.66511e+07	1.70971e+07	3.5976e+07	2.44046e+07	1.98372e+07	1.87123e+07	9.08243e+06	1.69974e+07	1.23185e+07	2.57177e+07	1.07519e+07	5.5745e+07
Com_275_pos	DL-Stachydrine	C7 H13 N O2	143.095	1.486	144.102	Full match	No results	No results	295266428	6.8031e+08	468620237	1166509946	3.28855e+08	1487993376	1414522842	1.63995e+08	4.53785e+08	5.44376e+08	6.00993e+08	1618211614	1526885325	4.40544e+08	1.68762e+08	432068873	2.85518e+08	8.65748e+08	1958146542	1292038106	5.05053e+08	2.73327e+08	1.97418e+08	1.4282e+08	5.24037e+08	2.38482e+08	563416108	1259745695	8.26101e+08	6.39166e+08	1253484459	2174989500	550424852	1128688720	4.7637e+08	6.44368e+08	2.32667e+08	1143270574	4.35625e+08	4.05922e+08	7.31612e+08
Com_2762_pos	Cytidine	C9 H13 N3 O5	243.086	1.35	244.094	No results	No results	Full match	1.08052e+07	1.19124e+07	2.29694e+07	1.62075e+07	2.7649e+07	5.96378e+06	7.79978e+06	7.85679e+06	9.20976e+06	4.61929e+07	3.09555e+07	9.92775e+06	8.47792e+06	1.88487e+07	2.99481e+07	9.30679e+06	7.06012e+06	1.26624e+07	4.49618e+06	1.13813e+07	1.54307e+07	9.23848e+06	2.52347e+07	6.39152e+06	1.31435e+07	5.9925e+07	1.64498e+07	1.88599e+07	2.93967e+07	1.59396e+07	1.09868e+07	1.97689e+07	1.54651e+07	1.32302e+07	1.36247e+07	1.64335e+07	1.53278e+07	2.28956e+07	1.57728e+07	4.00422e+07	1.573e+07
Com_2769_pos	3-hydroxy-3-methylpentanedioic acid	C6 H10 O5	184.038	7.109	185.045	Invalid mass	No results	No match	1.17342e+07	1.88885e+07	3.50896e+07	2.15466e+07	8.17736e+06	6.37366e+06	5.7951e+06	1.09094e+07	1.20532e+07	4.47657e+07	7.99716e+06	2.95021e+07	1.17794e+07	5.10624e+06	1.33921e+07	2.82863e+07	3.59997e+07	9.02888e+06	6.9826e+07	2.57018e+07	2.93723e+07	9.32953e+06	2.57944e+07	1.91189e+07	1.68131e+07	7.47624e+06	1.05715e+07	3.21033e+07	2.09185e+07	4.10595e+06	5.13651e+07	1.7763e+07	1.82578e+07	1.55591e+07	1.23765e+07	2.05023e+07	4.8223e+06	8.31859e+06	1.90255e+07	3.31753e+07	1.23767e+07
Com_2775_pos	Sinapinic acid	C11 H12 O5	206.056	9.139	207.063	Invalid mass	No results	No results	1.95106e+07	1.391e+07	4.6747e+07	1.82119e+07	1.01743e+07	1.63615e+07	2.12015e+07	3.42517e+07	1.64804e+07	2.29277e+07	2.87193e+07	3.42206e+07	3.36353e+07	3.62919e+07	3.27317e+07	2.06168e+07	2.86589e+07	3.89672e+07	4.09586e+07	2.80659e+07	2.22868e+06	35549575	19713427	2.63838e+07	3.12563e+07	50183241	2.95592e+07	1.58099e+07	9.42002e+06	9.94803e+06	3.32195e+07	3.73754e+07	1.97648e+07	2.57505e+07	1.53321e+07	1.16358e+07	8.46504e+06	1.71539e+07	1.6509e+07	1.42303e+07	1.48112e+07
Com_277_pos	SM (d18:2/22:2)	C45 H85 N2 O6 P	780.611	16.298	781.618	No results	Full match	No results	1051632349	1283069021	1267205041	1397101912	7.96514e+08	1007464092	1175796250	1634719670	1046055441	1760282067	1264097085	1465668232	9.52892e+08	1473088296	1731161291	1139442321	1753044683	1174076723	1208478262	1250829388	1935042173	1455288395	1132313316	1868230551	1205901285	1180327181	1767349353	1957333202	1528125037	1474514593	2384060931	1745016581	1931103969	1770247705	1790099635	1190882361	7.99172e+08	1527045336	1030814016	1088341073	1166554160
Com_278_pos	DL-Arginine	C6 H14 N4 O2	174.112	1.158	175.119	Full match	Full match	Full match	1596660393	1088101511	9.02371e+08	1172589370	1289083734	1010935541	1402589631	1190969479	9.19617e+08	1545935280	1352963933	1521115480	1520107960	1421776687	1886785820	8.1524e+08	1170944539	1139208980	1428397921	1476610799	1146404424	1454012237	8.14976e+08	1742574665	1020829382	1226791760	1323937745	1257693674	1684427876	9.41534e+08	1281783324	1363940457	1270219437	1561652018	1029471371	7.90284e+08	9.16221e+08	1446794200	1552772655	8.33132e+08	1354454847
Com_2816_pos	PC (18:5e/2:0)	C28 H48 N O7 P	541.319	14.158	542.326	No results	Full match	No results	8.62739e+06	1.39581e+07	1.22997e+07	1.12285e+07	1.45732e+07	4.41484e+06	8.56788e+06	1.38577e+07	2.43677e+07	8.15342e+06	6.54341e+07	1.42475e+07	9.64321e+06	7.64292e+06	3.18019e+06	9.32977e+06	7.00563e+06	1.19546e+07	1.00515e+07	2.89949e+07	6.30955e+06	1.21769e+07	2.62906e+06	5.66833e+06	8.30936e+06	1.48639e+07	1.59315e+07	1.45313e+07	1.91915e+07	1.70907e+07	1.27606e+07	1.76898e+07	9.14785e+06	7.34745e+06	1.23254e+07	1.18968e+07	8.89536e+06	9.83664e+06	1.05496e+07	4.16872e+06	4.73715e+06
Com_2845_pos	13-HPODE	C18 H32 O4	312.229	13.799	313.236	No results	No results	Full match	2.13766e+07	1.33818e+07	1.28155e+07	1.19441e+07	8.02665e+06	7.58647e+06	1.03242e+07	1.16308e+07	9.99094e+06	1.22436e+07	1.12219e+07	16342840	1.40485e+07	1.38333e+07	1.31766e+07	8.36652e+06	3.29614e+07	1.15528e+07	1.44867e+07	1.34386e+07	1.29293e+07	1.39462e+07	3.73759e+07	1.25718e+07	1.25589e+07	1.33135e+07	1.10391e+07	1.33482e+07	1.12518e+07	6.30972e+06	1.25403e+07	1.23158e+07	1.2376e+07	1.08184e+07	1.11784e+07	8.92858e+06	9.33923e+06	1.61156e+07	1.28197e+07	8.61261e+06	1.13683e+07
Com_287_pos	Isophorone	C9 H14 O	138.105	10.881	139.112	Full match	No results	Full match	6.58046e+07	5.97035e+07	6.11604e+07	6.43721e+07	1.83379e+08	1.99065e+08	3.28125e+08	5.82353e+07	1.31199e+08	6.37796e+07	6.87311e+07	6.32372e+07	7.64609e+07	6.04254e+07	1.10459e+08	1.61069e+08	1.31546e+08	6.4156e+07	6.60322e+07	5.77848e+07	5.88459e+07	5.84447e+07	1245453480	6.95253e+07	115082495	1.05662e+08	7.59745e+07	7.55994e+07	8.01382e+07	6.3929e+07	6.64934e+07	6.57204e+07	6.8203e+07	9.83034e+07	6.68999e+07	2.84428e+08	250503058	1.53312e+08	8.66885e+07	1.5864e+08	1.97891e+08
Com_2888_pos	LPC 18:3	C26 H48 N O7 P	517.318	14.215	518.325	No results	Full match	Full match	1.54005e+07	5.24955e+07	2.58637e+07	4.27662e+07	2.7129e+07	2.21942e+07	1.31587e+07	3.78502e+07	3.50007e+07	3.45077e+07	4.05724e+07	4.46546e+07	3.35688e+07	2.34867e+07	2.52152e+07	4.01409e+07	3.34209e+07	2.31228e+07	2.75238e+07	4.47383e+07	5.28991e+07	3.84163e+07	9.31804e+06	2.83596e+07	3.18649e+07	1.70159e+07	5.04381e+07	3.12342e+07	2.97124e+07	5.88503e+07	2.80643e+07	4.58037e+07	3.80234e+07	2.02271e+07	2.41461e+07	3.76393e+07	3.2617e+07	1.95886e+07	2.58319e+07	1.62648e+07	1.16886e+07
Com_2904_pos	FPK	C20 H30 N4 O4	390.224	9.681	391.231	Invalid mass	No results	No results	5.62565e+07	4.77945e+07	3.29456e+07	5.83584e+07	2.14663e+07	2.6503e+07	3.03432e+07	3.10985e+07	2.59131e+07	3.57158e+07	3.2719e+07	3.01713e+07	33070699	4.02657e+07	2.84696e+07	2.56631e+07	2.63673e+07	3.68267e+07	2.99154e+07	2.99379e+07	3.03696e+07	4.02573e+07	3.30998e+07	3.49209e+07	2.61964e+07	2.43871e+07	3.33831e+07	3.62582e+07	2.78547e+07	4.22703e+07	2.5113e+07	2.75236e+07	2.29758e+07	3.07048e+07	2.55632e+07	2.5566e+07	2.3068e+07	2.91488e+07	2.76985e+07	1.83326e+07	2.77516e+07
Com_290_pos	Caffeine	C8 H10 N4 O2	194.081	7.658	195.088	Full match	Full match	No results	8.11717e+06	3.31567e+07	1.87592e+08	7.15692e+06	1.55612e+07	4.92017e+06	2.03067e+07	6.64887e+06	6.10961e+06	8.29406e+06	2.25733e+07	7.82401e+06	4.92248e+07	8.12006e+06	6.96167e+06	7.31556e+07	6.76254e+06	6.5562e+06	8.32702e+06	1.4377e+07	7.23371e+06	2.1454e+07	1.1245e+07	1.70749e+08	1.77955e+08	1891118616	8.88202e+06	1.05334e+07	1720258255	3.42345e+07	9.42296e+06	9.10238e+06	8.4257e+07	1.71112e+07	7.67951e+06	1.20659e+08	8.89477e+06	8.12465e+06	8.30107e+06	6.64212e+06	1.03354e+07
Com_2916_pos	S-Sulfo-L-cysteine	C3 H7 N O5 S2	200.977	1.332	201.984	No results	No results	Full match	3.47051e+06	2.5473e+06	3.22351e+07	2.22836e+07	1.19531e+07	1.29761e+07	1.44056e+07	2.49548e+07	1.93266e+07	2.81651e+07	3.28393e+07	4.10739e+06	5.96579e+06	4.6607e+07	3.88014e+06	1.64614e+07	1.28512e+07	1.68251e+07	2.74819e+07	1.34453e+07	5.22109e+07	1.11156e+07	3.32637e+06	3.46715e+06	2.69659e+06	4.18604e+06	2.97952e+07	2.92733e+07	4.56573e+06	5.39687e+07	3.91468e+06	4.71179e+07	1.9288e+06	3.92793e+06	5.11295e+07	5.10758e+06	2.14762e+07	3.18133e+06	3.47532e+06	1.22504e+07	2.40166e+07
Com_2919_pos	Isobutyryl carnitine	C11 H21 N O4	231.148	7.768	232.155	No results	No results	Full match	2.78941e+06	2.21133e+06	2.47249e+06	2.01252e+06	2.77513e+07	3.00064e+07	1.93311e+07	1.90674e+06	1.70787e+07	2.2465e+06	2.06673e+06	2.19575e+06	3.10645e+06	1.96949e+06	5.19456e+06	3.75841e+07	1.56837e+07	2.34655e+06	2.07674e+06	1.77292e+06	2.03815e+06	1.67319e+06	2.0317e+07	2.32029e+06	1.11718e+07	2.99919e+06	3.59749e+06	3.13382e+06	3.02872e+06	2.18581e+06	2.68444e+06	2.24092e+06	2.25383e+06	9.39685e+06	2.18289e+06	2.13405e+07	3.83349e+07	12510132	9.93972e+06	2.7346e+07	5.11627e+07
Com_292_pos	5-OxoETE	C20 H30 O3	318.218	13.829	319.225	Invalid mass	No results	No results	216488309	1.39996e+08	1.41039e+08	1.43134e+08	9.69998e+07	8.66959e+07	1.23594e+08	1.54221e+08	1.02532e+08	1.40137e+08	1.62164e+08	1.65195e+08	169095084	1.43581e+08	1.41994e+08	9.98739e+07	1.08337e+08	1.49633e+08	1.4005e+08	2.25682e+08	1.75001e+08	1.52138e+08	1233532783	143631871	1.42562e+08	1.41229e+08	1.45612e+08	1.4846e+08	1.37295e+08	2.51718e+08	1.42341e+08	1.31356e+08	1.61379e+08	1.36339e+08	1.31301e+08	1.17012e+08	1.19758e+08	1.56762e+08	152813701	1.12189e+08	1.25135e+08
Com_2933_pos	PE (18:2e/18:1)	C41 H78 N O7 P	727.552	16.01	728.559	No results	Full match	No results	1.67203e+07	2.80849e+07	1.45225e+07	9.88245e+06	1.82994e+07	1.9998e+07	1.77677e+07	2.16e+07	2.70276e+07	1.8321e+07	2.44051e+07	2.58565e+07	2.06564e+07	2.45036e+07	2.70224e+07	1.62546e+07	2.83587e+07	1.59594e+07	1.11345e+07	1.80418e+07	4.84832e+07	2.52036e+07	3.5898e+07	4.42874e+07	3.81137e+07	2.68993e+07	3.89975e+07	3.33664e+07	2.84103e+07	3.10177e+07	5.20418e+07	3.73227e+07	3.3359e+07	2.20174e+07	4.54773e+07	1.86651e+07	2.81992e+07	2.85277e+07	1.07749e+07	2.59287e+07	1.52383e+07
Com_2946_pos	PC (16:0e/3:0)	C27 H56 N O7 P	537.381	15.551	538.388	No results	Full match	No results	2.45649e+07	2.09954e+07	2.00706e+07	4.55877e+07	1.26954e+07	1.15481e+07	2.11776e+07	2.73006e+07	2.09584e+07	1.9856e+07	3.09072e+07	2.48281e+07	2.09707e+07	2.94881e+07	3.05669e+07	2.0664e+07	2.2174e+07	3.31401e+07	2.24152e+07	3.11564e+07	2.88845e+07	5.78581e+07	1.79699e+07	1.81088e+07	1.71686e+07	4.35087e+07	2.18976e+07	3.13041e+07	2.31954e+07	2.65515e+07	1.49618e+07	2.53363e+07	2.53665e+07	1.6762e+07	1.98574e+07	1.32854e+07	9.32516e+06	1.6756e+07	1.37627e+07	1.58669e+07	1.36805e+07
Com_295_pos	gamma-Nonanolactone	C9 H16 O2	156.116	11.067	157.123	No results	No results	Full match	4.10502e+07	4.39316e+07	4.19949e+07	4.51524e+07	1.29342e+08	1.3089e+08	3.31564e+08	3.90979e+07	1.40768e+08	4.68596e+07	5.0037e+07	4.80784e+07	5.06819e+07	4.36726e+07	8.39279e+07	1.31748e+08	9.85895e+07	4.41382e+07	4.6053e+07	3.69019e+07	4.06585e+07	3.8198e+07	1217259481	4.58483e+07	7.72686e+07	6.99372e+07	4.94867e+07	5.20981e+07	5.44956e+07	4.27935e+07	4.7801e+07	4.86442e+07	4.951e+07	6.51866e+07	4.294e+07	2.80547e+08	1.28905e+08	1.00753e+08	6.0672e+07	1.736e+08	1.06884e+08
Com_2975_pos	α-Linolenic acid	C18 H30 O2	278.225	15.158	279.232	Full match	No results	Full match	2.29746e+07	3.17777e+07	3.79656e+07	4.6303e+07	1.67085e+07	1.5332e+07	1.91371e+07	3.30525e+07	2.37797e+07	3.13805e+07	3.6898e+07	3.10375e+07	5.21372e+07	4.55835e+07	2.05308e+07	2.95031e+07	2.86961e+07	3.93425e+07	2.98475e+07	3.43553e+07	3.53785e+07	3.92016e+07	2.89898e+07	4.52259e+07	3.68318e+07	4.0761e+07	4.49918e+07	3.75731e+07	3.60764e+07	3.19643e+07	4.27597e+07	3.82614e+07	2.83146e+07	3.65989e+07	3.67128e+07	2.49613e+07	4.2953e+07	3.51069e+07	5.13483e+07	2.42643e+07	2.31945e+07
Com_2990_pos	N6,N6,N6-Trimethyl-L-lysine	C9 H20 N2 O2	188.153	1.152	189.16	Full match	Full match	Full match	1.35026e+07	2.33927e+07	1.78593e+07	1.86412e+07	1.55718e+07	1.50892e+07	15780827	1.2384e+07	2.50428e+07	1.60718e+07	2.84762e+07	3.31631e+07	2.57273e+07	1.42429e+07	1.87498e+07	1.13004e+07	1.29018e+07	1.38692e+07	2.19398e+07	1.46358e+07	1.55155e+07	1.37706e+07	3.47436e+07	3.28636e+07	2.05707e+07	1.33713e+07	2.53202e+07	2.26575e+07	3.0983e+07	1.93505e+07	2.35187e+07	2.23759e+07	1.89338e+07	2.01759e+07	1.71604e+07	2.20173e+07	1.17401e+07	1.76951e+07	2.37343e+07	1.45667e+07	1.11044e+07
Com_299_pos	PC (14:1e/22:3)	C44 H82 N O7 P	767.584	15.396	768.591	No results	Full match	No results	1311815677	8.86333e+08	1486916897	905244385	804463845	1075664197	9.86007e+08	9.85555e+08	1097991528	9.60663e+08	1332230723	1394043994	1458599930	4.4474e+08	1233404024	9.37453e+08	1036007504	1129540444	1155210763	1477535107	1244885880	1323954849	9.69359e+08	1919846044	9.59372e+08	1794644837	2003959556	1160333933	1662533921	1225658068	8.57241e+08	1520356685	1658841900	5.49039e+08	1485815058	9.8291e+08	7.83459e+08	1170274966	1104267345	1337280512	6.26876e+08
Com_3002_pos	Homogentisic Acid	C8 H8 O4	168.043	12.859	169.05	No results	No results	Full match	1.21112e+07	7.31951e+06	2.60395e+07	3.03423e+07	3.88248e+06	4.26342e+06	3.72197e+06	2.07762e+07	4.35084e+06	2.65157e+07	2.13501e+07	7.1545e+06	1.03293e+07	4.47758e+07	4.41136e+06	6.7502e+06	5.83319e+06	5.5466e+07	3.39336e+07	3.49319e+07	5.36073e+07	3.24673e+07	2.98848e+06	8.73892e+06	6.39225e+06	4.02486e+06	2.4411e+07	2.99314e+07	9.46834e+06	3.70411e+07	7.50749e+06	2.57447e+07	7.69387e+06	7.03509e+06	2.49988e+07	4.26626e+06	4.52475e+06	6.22137e+06	5.53859e+06	4.91771e+06	4.59024e+06
Com_301_pos	4-Hydroxyisoleucine	C6 H13 N O3	147.09	1.591	148.097	No results	No results	Full match	1145882685	1122491737	6.7102e+08	8.28358e+08	5.36047e+08	6.26958e+08	1399144699	7.75186e+08	2.70009e+08	5.60438e+08	8.44549e+08	1363562435	1180785961	6.00187e+08	1159416034	9.47258e+08	7.27786e+08	6.79618e+08	7.50434e+08	6.66874e+08	5.90548e+08	5.0148e+08	2.13612e+08	5.65802e+08	7.01495e+08	1778683005	6.39494e+08	6.75533e+08	684105864	1178950416	6.44912e+08	6.4418e+08	8.72272e+08	7.13619e+08	4.35314e+08	3.52663e+08	2.67162e+08	864107714	5.64579e+08	6.84104e+08	7.00756e+08
Com_3020_pos	PE (18:2/18:2)	C41 H74 N O8 P	739.512	16.341	740.519	No results	Full match	No results	3.11215e+07	1.71687e+07	1.53784e+07	2.61776e+07	1.93584e+07	20757482	2.66353e+07	3.02573e+07	1.95704e+07	2.5268e+07	2.74013e+07	2.63537e+07	3.16759e+07	2.67803e+07	2.43437e+07	1.30405e+07	1.41564e+07	2.2995e+07	3.05512e+07	1.6911e+07	2.62909e+07	5.54587e+07	1.63572e+07	3.95471e+07	4.51959e+07	2.73237e+07	2.45288e+07	2.19178e+07	3.10797e+07	4.20965e+07	2.74899e+07	3.22992e+07	2.52188e+07	2.20409e+07	3.67619e+07	1.30381e+07	2.36202e+07	1.33598e+07	2.87949e+07	7.77007e+06	1.98273e+07
Com_3039_pos	Prostaglandin E2-1-glyceryl ester	C23 H38 O7	408.25	14.348	409.257	Invalid mass	No results	No results	3.24326e+06	6.94031e+06	7.15395e+06	8.81675e+06	3.18675e+07	3.06312e+07	1.92103e+07	4.86649e+06	3.50244e+07	9.17615e+06	4.11996e+06	2.71061e+06	4.97587e+06	6.68668e+06	2.96977e+06	3.67379e+07	1.37139e+07	1.12114e+07	3.54226e+06	6.90274e+06	1.31207e+07	6.14284e+06	3.31057e+06	6.97787e+06	2.27572e+07	2.97639e+07	3.50885e+06	6.69308e+06	3.58423e+06	8.84056e+06	3.13186e+06	7.43257e+06	4.43303e+06	4.65444e+06	3.79574e+06	2.2565e+07	2.76844e+07	1.46872e+07	1.13966e+07	2.73281e+07	1.91923e+07
Com_3055_pos	4-Acetamidobutyric Acid	C6 H11 N O3	145.074	1.27	146.081	No results	No results	Full match	7.46463e+06	1.74073e+07	1.06042e+07	1.35977e+07	7.13189e+06	4.43692e+06	8.82485e+06	7.90761e+06	3.85883e+06	1.13479e+07	1.64919e+07	1.77973e+07	1.83427e+07	5.64935e+06	1.09258e+07	7.34111e+06	5.08109e+06	7.43922e+06	7.2026e+06	1.24255e+07	4.79252e+06	4.12961e+07	3.32995e+07	1.01426e+07	7.20917e+06	1.3654e+07	1.06119e+07	2.2197e+07	1.28057e+07	1.11159e+07	6.95005e+06	6.81407e+06	7.21839e+06	7.12474e+06	6.58338e+06	1.84402e+07	4.59601e+06	7.60935e+06	5.15493e+06	8.81087e+06	8.92636e+06
Com_305_pos	LSD-d3	C20 H22 [2]H3 N3 O	326.22	15.278	327.228	Full match	No results	No results	1874602626	7.21583e+08	7.23616e+08	4.56994e+08	7.0626e+08	506183351	3.53431e+08	1141505137	5.70924e+08	1160844569	8.42318e+08	8.58223e+08	1590355973	7.68242e+08	602870559	3.94575e+08	4.79155e+08	700280516	6.11615e+08	1228987043	6.73006e+08	4.98201e+08	8.27717e+08	9.70825e+08	1042594797	5.34502e+08	4.27267e+08	8.34025e+08	6.20448e+08	8.9166e+08	9.3956e+08	6.61527e+08	1197530720	7.6872e+08	6.47059e+08	4.16361e+08	8.47501e+08	1438928692	1028804284	5.84229e+08	8.17219e+08
Com_3071_pos	PC (18:5e/16:4)	C42 H68 N O7 P	712.441	14.501	713.45	No results	Invalid mass	No results	4.36376e+06	5.04976e+06	5.00004e+06	4.69073e+06	2.62124e+07	2.28209e+07	1.53522e+07	4.90273e+06	1.80737e+07	6.81791e+06	8.89166e+06	5.1715e+06	5.92411e+06	4.18939e+06	3.71999e+06	2.58687e+07	1.70413e+07	1.14798e+07	5.04104e+06	5.09983e+06	5.80025e+06	5.88312e+06	1.26797e+07	4.36562e+06	5.27693e+06	5.28055e+06	7.56972e+06	5.74286e+06	5.96214e+06	6.05866e+06	5.65809e+06	6.12521e+06	7.79288e+06	6.96632e+06	7.03471e+06	1.10057e+07	2.62162e+07	6.40618e+06	5.40298e+06	1.27824e+07	8.08453e+06
Com_307_pos	DL-Lysine	C6 H14 N2 O2	146.106	1.085	147.113	Full match	Full match	Full match	5.11908e+08	5.8271e+08	5.94163e+08	4.75476e+08	3.87736e+08	2.65785e+08	5.70954e+08	8.03554e+08	7.2078e+08	6.28597e+08	9.33232e+08	7.29763e+08	6.14801e+08	3.30476e+08	5.89084e+08	3.63491e+08	4.00049e+08	1122719791	7.17506e+08	8.33168e+08	7.01933e+08	6.32457e+08	1149960959	7.97786e+08	7.25736e+08	5.38127e+08	7.90937e+08	6.97381e+08	7.55494e+08	7.40721e+08	5.50857e+08	4.97195e+08	5.70417e+08	7.91134e+08	814402008	3.69097e+08	4.19872e+08	4.02965e+08	6.16006e+08	472674648	4.80829e+08
Com_30_pos	PC (18:2/18:2)	C44 H80 N O8 P	781.563	16.518	782.57	No results	Full match	No results	11274111394	25997786130	17151889634	10552168959	8103696694	13320010113	12356906086	18360424927	19326673756	10401643570	15021680424	10580674173	3532743380	11637774687	12066884392	6025029137	7926723721	11610743887	17525038126	8613292999	11698841397	10247764760	5745195911	12206269759	15007177858	14828974375	16225654811	12252560848	10877614911	16393481581	11919817563	14063261034	13564569505	7510105949	13499964962	6019157049	10656216510	9522934137	25889363382	9795159589	8271192976
Com_3138_pos	ANH	C13 H20 N6 O5	340.151	12.412	341.158	Full match	No results	No results	9.58317e+06	8.69369e+06	1.5349e+07	5.1132e+07	3.70588e+06	2.91282e+06	2.543e+06	9.59723e+06	2.78859e+06	1.50308e+07	1.07247e+07	6.89617e+06	8.84634e+06	1.46311e+07	2.79941e+06	2.41431e+06	4.53795e+06	1.39197e+07	1.42093e+07	1.14959e+07	1.6525e+07	1.07834e+07	1.90333e+06	7.34957e+06	3.13184e+06	3.85715e+06	1.25165e+07	8.40889e+06	5.79328e+06	1.60617e+07	4.6316e+06	6.92351e+06	5.12733e+06	4.2808e+06	5.93491e+06	2.75716e+06	3.10069e+06	4.02151e+06	4.12228e+06	3.40666e+06	3.46584e+06
Com_313_pos	PC (18:4/20:4)	C46 H76 N O8 P	1603.08	16.619	802.545	No results	Invalid mass	No results	1088168129	1650208468	1677952628	961255365	9.3077e+08	9.03883e+08	1166785484	1017200688	9.78602e+08	1274609329	1259573653	9.67724e+08	1521988586	1285017199	1097377296	6.23123e+08	8.96379e+08	1208410356	1656802729	9.20105e+08	9.89255e+08	1034948484	5.24278e+08	1308923172	1354794637	1219620605	1392060155	1176474414	1200293307	1106172135	975628552	1318597613	1302070459	7.51806e+08	1466670842	6.51924e+08	1037689590	1086277433	1986520179	881951915	9.60037e+08
Com_3191_pos	SM (d20:0/14:0)	C39 H81 N2 O6 P	704.584	15.219	705.591	No results	Full match	No results	3.45939e+07	2.27019e+07	4.47376e+07	4.40448e+07	1.38562e+07	1.95293e+07	3.60731e+07	2.35684e+07	1.55736e+07	1.96882e+07	4.10803e+07	4.18176e+07	3.31308e+07	2.77576e+07	3.96302e+07	1.39478e+07	2.55296e+07	2.54966e+07	3.04167e+07	3.63777e+07	2.00119e+07	2.36528e+07	2.27138e+07	3.39838e+07	3.77746e+07	1.72553e+06	2.42847e+07	3.24027e+07	2.72334e+07	2.65968e+07	4.84186e+07	3.67681e+07	2.32078e+07	3.32125e+07	2.46946e+07	2.6849e+07	1.67267e+07	4.11226e+07	3.44445e+07	3.22542e+07	3.05721e+07
Com_3196_pos	Glycerol-3-phosphate	C3 H9 O6 P	172.014	1.387	173.021	No results	No results	Full match	2.45715e+07	4.68834e+06	1.59831e+07	1.41917e+07	3.11822e+06	5.04554e+06	1.07773e+07	7.85348e+06	3.87692e+06	1.23021e+07	9.25034e+06	4.47293e+06	3.82863e+06	1.79695e+07	1.65389e+07	3.99684e+06	7.04454e+06	1.4967e+07	1.75195e+07	8.06761e+06	7.24123e+06	2.75939e+07	7.27586e+06	4.37286e+06	3.27323e+06	1.76842e+07	7.80591e+06	1.40551e+07	6.14703e+06	5.81896e+06	6.15434e+06	1.17621e+07	5.32014e+06	6.77434e+06	9.81021e+06	3.58837e+06	6.35787e+06	9.20292e+06	4.12662e+06	4.63115e+06	1.20289e+07
Com_3206_pos	Tiglic acid	C5 H8 O2	100.053	9.934	101.06	No results	No results	Full match	6.28557e+06	6.4517e+06	6.84715e+06	6.44305e+06	1.81021e+07	1.76529e+07	1.82612e+07	6.19823e+06	1.47684e+07	6.95132e+06	6.8707e+06	6.93262e+06	8.5944e+06	6.6485e+06	7.66232e+06	1.53649e+07	1.32476e+07	6.75295e+06	6.53904e+06	6.04322e+06	5.47445e+06	6.10438e+06	1.85515e+07	7.10237e+06	9.1448e+06	7.12317e+06	1.00266e+07	1.04974e+07	1.09438e+07	7.90068e+06	8.89886e+06	8.85556e+06	9.86165e+06	1.17923e+07	9.21652e+06	2.97026e+07	3.08284e+07	16738960	9.91816e+06	1.88695e+07	2.52042e+07
Com_3236_pos	3-hydroxy-1,5-diphenylpentan-1-one	C17 H18 O2	276.112	8.799	277.119	Invalid mass	No results	No results	1.55756e+07	4.24798e+06	1.35448e+07	6.73867e+06	1.4787e+07	7.86212e+06	2.03596e+07	12484026	1.2236e+07	7.80804e+06	4.34934e+06	3.96385e+06	2.51876e+06	3.08875e+07	1.48045e+07	1.68215e+06	8.54536e+06	2.39785e+07	3.97436e+07	1.77195e+07	1.03382e+07	1.6546e+07	3.03724e+07	1.09812e+07	2.5433e+06	9.21694e+06	8.57551e+06	1.04155e+07	6.27642e+06	7.4633e+06	1.36695e+07	1.33084e+07	5.29228e+06	6.43586e+06	1.2263e+07	1.54913e+07	5.41764e+06	2.94642e+06	4.50772e+06	5.52834e+06	6.67984e+06
Com_323_pos	Methionine sulfoxide	C5 H11 N O3 S	165.046	1.729	166.054	Full match	Full match	No results	1218513752	1094792628	9.97531e+08	1171635240	7.67374e+08	6.13674e+08	827945593	1436359072	6.92605e+08	1409804396	7.55825e+08	1084694624	1385702118	973290087	8.40995e+08	4.82697e+08	9.26382e+08	1073430384	1007794449	1113443796	1060884899	9.85416e+08	6.24132e+08	1248685931	9.85779e+08	9.17729e+08	1636215959	1489733756	1871168765	1303743813	1901161713	1744128497	1601571715	1768254296	1495244772	9.85697e+08	1237603496	1710461501	9.17264e+08	1037124566	1537991726
Com_324_pos	Creatinine	C4 H7 N3 O	113.059	1.229	114.067	Full match	Full match	Full match	1259365064	1024246270	9.24715e+08	1070783652	8.75283e+08	8.18984e+08	8.07883e+08	8.8677e+08	7.49239e+08	1288162786	890920873	1342902756	1403889775	1034821641	9.37711e+08	7.71911e+08	1051435228	8.55786e+08	9.49719e+08	6.86557e+08	950452846	6.99404e+08	4.36946e+08	1954683699	1373236034	8.27489e+08	1274689194	1111685042	1277898411	1007265515	9.65682e+08	1266339473	1249658445	1152657596	1023843836	7.48875e+08	7.80174e+08	1302672992	1443590175	7.5953e+08	1032253135
Com_3255_pos	SM (d21:2/15:1)	C41 H79 N2 O6 P	352.293	15.608	727.575	No results	Invalid mass	No results	1.6956e+06	7.21479e+06	1.80265e+06	1.61784e+06	1.31421e+06	2.04237e+06	2.32877e+06	1.18971e+06	1.50443e+06	2.13412e+06	2.16001e+06	1.04102e+06	2.43263e+06	2.239e+06	2.44159e+06	1.18497e+06	908475	1.56985e+06	2.48554e+06	1.27335e+06	1.75603e+06	1.84747e+06	988030	2.21878e+06	2.42615e+07	1.47974e+06	2.17544e+06	2.29642e+06	2.88315e+06	2.3299e+06	2.15502e+06	3.28743e+06	1.72998e+06	3.28847e+07	2.33063e+06	1.17535e+06	1.65078e+06	1.79698e+06	2.85675e+06	1.89978e+06	1.59332e+06
Com_3257_pos	Kinetin	C10 H9 N5 O	215.081	0.548	216.089	No results	No results	Full match	4.07929e+06	4.22504e+06	4.49367e+06	4.04254e+06	2.87341e+06	2.91486e+06	3.83819e+06	3.974e+06	684790	4.7611e+06	1.24094e+06	4.70314e+06	4.67243e+06	5.47069e+06	4.26494e+06	2.61168e+06	3.67167e+06	3.27044e+06	4.21153e+06	3.71701e+06	4.66034e+06	3.85907e+06	2.43121e+06	4.63944e+06	4.49769e+06	2.97958e+06	5.35939e+07	1.20198e+07	9.0143e+06	7.87266e+06	7.60173e+06	6.74197e+06	7.10378e+06	5.70958e+06	5.31921e+06	4.50807e+06	3.48935e+06	5.78806e+06	5.61759e+06	5.31699e+06	4.87678e+06
Com_3282_pos	N-Desmethyltramadol	C15 H23 N O2	249.171	15.066	250.178	Invalid mass	No results	No results	1.98738e+07	2.2277e+07	1.29612e+07	2.19073e+07	1.20353e+07	1.50167e+07	6.36289e+06	1.24775e+07	8.28313e+06	1.06871e+07	1.53179e+07	1.44377e+07	2.08471e+07	1.56843e+07	1.3038e+07	1.22978e+07	1.16294e+07	1.27761e+07	1.13347e+07	1.37787e+07	1.10565e+07	1.12525e+07	5.19067e+06	1.58172e+07	1.44694e+07	1.08727e+07	1.62152e+07	1.37103e+07	2.68488e+07	1.60783e+07	1.67034e+07	1.98827e+07	1.7119e+07	2.77146e+07	2.08328e+07	1.54757e+07	1.13445e+07	2.15175e+07	1.91966e+07	4.28104e+07	1.62107e+07
Com_330_pos	3-hydroxy-2-octylpentanedioic acid	C13 H24 O5	242.152	11.316	243.16	Invalid mass	No results	No results	1.38683e+07	1.58095e+07	1.60017e+07	1.69264e+07	6.53497e+08	4.99346e+08	1.07178e+08	1.45346e+07	3.25134e+08	1.57949e+07	1.49605e+07	1.75862e+07	1.65646e+07	1.51812e+07	2.01709e+07	1118188955	5.49097e+08	1.59455e+07	1.58147e+07	1.31792e+07	1.56787e+07	1.45266e+07	7.97662e+07	1.6829e+07	2.13282e+08	1.5498e+07	1.98896e+07	2.19395e+07	2.2178e+07	18237170	1.79845e+07	1.83003e+07	1.59412e+07	3.09488e+07	1.62462e+07	1.41829e+08	1.39534e+08	2.39999e+08	1.0302e+08	4.76914e+08	404540474
Com_3331_pos	PC (19:2/18:4)	C45 H78 N O8 P	1583.08	15.018	792.55	No results	Invalid mass	No results	2.24971e+07	1.98469e+07	2.62239e+07	2.6192e+07	1.23418e+07	1.32736e+07	3.05283e+07	3.70332e+07	1.66914e+07	2.39666e+07	2.2264e+07	2.87152e+07	2.2163e+07	1.94348e+07	2.41585e+07	1.21645e+07	2.34777e+07	1.71351e+07	3.36094e+07	24438273	3.08345e+07	1.935e+07	6.89154e+06	1.80373e+07	1.38258e+07	2.60563e+07	2.11851e+07	2.35998e+07	2.05292e+07	1.96466e+07	4.5118e+07	8.2272e+06	2.94814e+07	2.18117e+07	1.57941e+07	1.91118e+07	7.54642e+06	2.54372e+07	8.39608e+06	2.91737e+07	1.0332e+07
Com_3335_pos	4-Methoxycinnamic Acid	C10 H10 O3	178.063	14.669	179.071	No results	No results	Full match	4.71113e+07	2.89538e+06	2.3808e+06	3.04936e+06	1.26722e+06	1.54719e+06	1.25377e+06	1.9779e+06	1.48054e+06	2.43393e+06	2.05996e+06	2.05195e+06	2.08575e+06	2.60135e+06	2.03879e+06	1.80279e+06	1.6548e+06	2.87684e+06	2.76038e+06	2.59017e+06	2.69935e+06	2.00347e+06	1.27485e+06	2.10077e+06	2.73792e+06	2.16715e+06	2.24429e+06	3.80818e+06	2.89003e+06	2.2955e+06	3.00011e+06	3.03051e+06	2.4161e+06	2.09933e+06	2.36126e+06	1.61542e+06	1.35846e+06	3.04821e+06	1.86732e+06	1.98674e+06	1.63009e+06
Com_3364_pos	N-[2-chloro-6-(trifluoromethoxy)phenyl]-2,2-dimethylpropanamide	C12 H13 Cl F3 N O2	295.059	1.234	296.067	Full match	No results	No results	2.97993e+07	394968	1.75589e+07	2.61076e+07	506728	8.13074e+06	6.46657e+06	1.35381e+07	8.66502e+06	2.21161e+07	2.35109e+07	1.50673e+07	9.05e+06	1.66578e+07	1.72116e+07	1.2585e+07	1.98256e+07	2.30623e+07	2.14361e+07	1.40745e+07	1.70649e+07	4.30725e+07	4.28533e+06	2.28888e+07	1.54802e+07	2.3833e+07	9.06945e+06	1.6037e+07	1.22781e+07	7.36307e+06	8.03294e+06	1.69139e+07	9.47163e+06	1.00554e+07	1.70012e+07	4.30931e+06	441853	9.1236e+06	4.65857e+06	327618	1.61593e+07
Com_3400_pos	Citraconic acid	C5 H6 O4	130.027	7.978	131.034	No results	No results	Full match	6.19429e+06	5.71133e+06	6.60113e+06	5.85564e+06	2.09252e+07	2.00213e+07	2.49054e+07	5.33522e+06	1.84818e+07	7.10319e+06	6.42015e+06	6.54851e+06	7.51098e+06	5.77157e+06	9.52568e+06	2.11838e+07	1.82895e+07	5.95857e+06	6.84776e+06	5.23184e+06	5.13868e+06	5.54849e+06	2.82208e+07	6.99764e+06	1.59356e+07	9.10239e+06	6.5647e+06	7.69628e+06	8.28547e+06	6.01336e+06	9.2324e+06	7.2522e+06	7.09249e+06	1.19307e+07	6.87504e+06	2.65666e+07	3.11321e+07	2.27412e+07	1.03454e+07	2.31854e+07	3.05147e+07
Com_3487_pos	1-[2-(2,5-dimethyl-1H-pyrrol-1-yl)-4-nitrophenyl]-1H-imidazole	C15 H14 N4 O2	282.109	8.501	283.116	Invalid mass	No results	No results	1.23951e+06	941278	1.00219e+06	992625	1.82157e+07	2.03825e+07	1.6585e+07	730293	1.3826e+07	905104	1.01041e+06	1.07047e+06	1.44998e+06	1.00705e+06	3.15275e+06	2.06849e+07	9.03068e+06	1.10478e+06	1.26586e+06	1.14513e+06	1.11777e+06	959018	7.58436e+06	1.13019e+06	1.0647e+07	3.17859e+06	980814	1.28385e+06	1.19639e+06	876280	1.04231e+06	937123	1.02426e+06	3.12549e+06	1.17422e+06	1.61553e+07	3.31509e+07	1.03155e+07	4.15783e+06	1.48509e+07	2.58866e+07
Com_352_pos	Hippuric acid	C9 H9 N O3	179.059	7.377	180.066	Full match	No results	Full match	1.20372e+08	4.41051e+08	1.50779e+08	2.01508e+08	8.81238e+08	2.46681e+08	2.82353e+08	6.56348e+07	2.12864e+08	7.8564e+07	2.04564e+08	115400699	1.62428e+08	1.0432e+08	2.54187e+08	1.10457e+08	1.00558e+08	2.47129e+08	1.82726e+08	9.86458e+07	1.10235e+08	1.66709e+08	3.90413e+07	2.08065e+08	8.31264e+07	1.60359e+08	2.17416e+08	1.12212e+08	1143335488	1.60579e+08	1.21974e+08	1.65401e+08	1.48603e+08	124414854	1.12675e+08	4.0412e+07	1.62518e+08	1.18407e+08	1.28848e+08	2.51178e+08	1.6343e+08
Com_353_pos	5,6-dimethyl-4-oxo-4H-pyran-2-carboxylic acid	C8 H8 O4	146.058	6.588	147.066	Invalid mass	No results	No match	5.73377e+07	5.16417e+07	5.71863e+07	5.1039e+07	5.46394e+07	6.0771e+07	1.07363e+08	5.01492e+07	6.97539e+07	5.86895e+07	5.33097e+07	6.20016e+07	6.06995e+07	4.99647e+07	1.05019e+08	5.55497e+07	5.66036e+07	6.59567e+07	6.29668e+07	4.46809e+07	4.8994e+07	4.64502e+07	9.61674e+08	6.82245e+07	5.61109e+07	7.19503e+07	6.34087e+07	6.03818e+07	6.30232e+07	5.24251e+07	6.12767e+07	5.77546e+07	6.07311e+07	5.6604e+07	6.06123e+07	9.03022e+07	5.63824e+07	6.69079e+07	5.65365e+07	5.7742e+07	6.3761e+07
Com_3592_pos	PC (18:4e/20:3)	C46 H80 N O7 P	789.568	16.765	790.575	No results	Full match	No results	2.55769e+07	2.53748e+07	2.1994e+07	2.41032e+07	1.78776e+07	2.1819e+07	2.85032e+07	3.2127e+07	2.19421e+07	3.03817e+07	2.67639e+07	3.87109e+07	3.4304e+07	3.31285e+07	3.51727e+07	1.75842e+07	2.1928e+07	2.85588e+07	36035225	2.30152e+07	2.76264e+07	3.14061e+07	1.13993e+07	3.33977e+07	2.48363e+07	2.36288e+07	3.4578e+07	3.38395e+07	3.98626e+07	4.29176e+07	2.67919e+07	3.14946e+07	3.53899e+07	4.37218e+07	3.42145e+07	2.23802e+07	1.75897e+07	3.13825e+07	2.88923e+07	8.36061e+06	2.47173e+07
Com_3613_pos	N-(4-butyl-2-methylphenyl)-N'-[4-(4-methylpiperazino)phenyl]urea	C23 H32 N4 O	380.255	13.822	381.262	Invalid mass	No results	No results	5.35436e+06	5.66156e+06	4.69719e+06	5.93701e+06	1.35369e+07	1.17025e+07	1.77699e+07	5.6145e+06	1.41918e+07	5.29531e+06	4.71589e+06	5.43528e+06	6.65096e+06	5.6611e+06	5.76041e+06	13298132	8.61869e+06	5.41274e+06	4.93444e+06	3.73509e+06	4.93858e+06	5.32421e+06	2.55167e+07	6.02933e+06	7.31041e+06	5.33519e+06	4.9412e+06	4.7888e+06	4.61033e+06	5.20141e+06	4.77304e+06	5.05437e+06	5.34215e+06	5.73441e+06	5.09007e+06	1.77149e+07	1.43814e+07	6.3993e+06	5.95648e+06	9.6324e+06	1.10287e+07
Com_361_pos	PC (16:0e/22:5)	C46 H84 N O7 P	793.599	15.636	794.607	No results	Full match	No results	948088557	1175805604	1114730169	6.43435e+08	4.9259e+08	5.13668e+08	4.99091e+08	1435809761	689618666	5.78839e+08	8.90371e+08	7.34038e+08	395662926	9.07988e+08	1162154274	6.05454e+08	6.78172e+08	6.62642e+08	8.68906e+08	1006688827	678419210	6.31093e+08	6.05823e+08	1228637647	8.43192e+08	8.42618e+08	1392383152	1489024812	6.21548e+08	6.97517e+08	8.80486e+08	1135551300	9.83225e+08	6.32408e+08	6.06246e+08	7.77944e+08	3.64778e+08	7.26681e+08	8.50793e+08	1254758043	4.48055e+08
Com_3623_pos	(2R,3S,4S,5R,6R)-2-(hydroxymethyl)-6-(propan-2-yloxy)oxane-3,4,5-triol	C9 H18 O6	244.093	1.136	245.1	Invalid mass	No results	No results	4.02368e+07	3.89844e+07	3.4332e+07	3.85822e+07	2.80862e+07	2.75106e+07	2.63439e+07	3.46556e+07	2.70851e+07	3.62577e+07	3.2868e+07	4.14494e+07	4.41809e+07	3.3353e+07	3.21798e+07	2.72996e+07	2.83025e+07	3.96145e+07	3.65135e+07	3.39347e+07	1.43596e+07	3.64267e+07	1.47539e+07	3.80171e+07	3.59161e+07	3.50089e+07	3.65564e+07	4.02562e+07	4.69315e+07	3.44442e+07	4.18378e+07	4.54504e+07	3.98816e+07	4.18153e+07	3.42161e+07	2.01685e+07	2.65586e+07	4.0647e+07	3.23261e+07	3.34182e+07	2.89326e+07
Com_3626_pos	Ecdysterone	C27 H44 O7	458.325	14.261	459.333	Invalid mass	No results	No results	4.62165e+06	6.13363e+06	6.45971e+06	5.88222e+06	1.14275e+07	1.00962e+07	6.81808e+06	6.393e+06	1.1729e+07	4.82071e+06	5.93753e+06	5.36948e+06	6.16868e+06	6.0957e+06	3.77194e+06	1.22084e+07	1.20098e+07	4.52209e+06	5.52587e+06	4.44778e+06	5.04358e+06	6.29158e+06	4.72349e+06	6.55954e+06	1.47628e+07	7.37287e+06	7.46735e+06	9.61187e+06	6.62281e+06	7.91617e+06	8.16677e+06	5.91903e+06	7.85213e+06	7.96397e+06	7.41377e+06	1.08314e+07	1.4217e+07	7.13966e+06	7.57487e+06	1.25318e+07	1.07003e+07
Com_3638_pos	PC (18:2e/22:2)	C48 H90 N O7 P	823.645	14.966	824.653	No results	Full match	No results	3.21297e+07	2.91174e+07	2.38484e+07	1.60948e+07	1.62543e+07	2.06957e+07	1.46982e+07	2.35904e+07	1.05313e+07	2.01414e+07	2.69762e+07	1.80992e+07	3.5738e+07	3.63333e+07	1.04431e+07	1.33887e+07	1.60195e+07	2.66458e+07	2.96858e+07	1.64076e+07	1.34935e+07	1.58847e+07	9.55818e+06	1.83102e+07	2.38343e+07	2.71775e+07	1.41733e+07	2.75575e+07	3.65771e+07	3.30216e+07	1.54427e+07	1.98727e+07	2.84599e+07	3.81318e+07	2.59569e+07	1.50215e+07	1.78845e+07	2.63586e+07	2.17419e+07	1.99627e+07	1.89156e+07
Com_3684_pos	1,2-dihydroxyheptadec-16-yn-4-yl acetate	C19 H34 O4	326.246	13.566	327.253	Full match	No results	No results	4.75516e+06	5.15147e+06	4.78196e+06	4.74526e+06	1.4001e+07	1.10607e+07	1.60863e+07	5.49815e+06	1.16371e+07	5.76201e+06	5.31644e+06	4.97574e+06	5.61788e+06	4.83092e+06	7.33641e+06	1.35613e+07	8.56371e+06	4.96482e+06	5.16924e+06	4.45272e+06	4.83027e+06	5.4409e+06	1.77781e+07	5.54113e+06	6.74252e+06	5.90335e+06	6.16012e+06	6.80345e+06	7.66488e+06	6.20874e+06	5.31154e+06	6.11839e+06	5.14665e+06	6.45495e+06	4.55675e+06	1.48601e+07	1.20405e+07	6.73787e+06	5.91473e+06	1.16192e+07	1.08505e+07
Com_3692_pos	Fasciculic acid B	C36 H60 O9	636.435	15.225	637.442	Invalid mass	No results	No results	4.71884e+06	5.84609e+06	1.07057e+07	1.86131e+07	2.85544e+06	5.58922e+06	3.68009e+06	1.07997e+07	7.65044e+06	9.37182e+06	1.86587e+07	8.90158e+06	2.13632e+07	1.03527e+07	3.98945e+06	2.68016e+07	7.48371e+06	1.95017e+07	7.0634e+06	1.27882e+07	1.42595e+07	1.34601e+07	1.34044e+07	1.54857e+07	1.02622e+07	1.1137e+07	4.71134e+06	7.98333e+06	7.66416e+06	9.95259e+06	5.08473e+06	7.61416e+06	6.34789e+06	1.09621e+07	1.21414e+07	5.14034e+06	1.99407e+07	9.12215e+06	1.87009e+07	4.55643e+06	3.56187e+06
Com_3698_pos	SM (d23:3/17:0)	C45 H87 N2 O6 P	782.632	16.284	783.64	No results	Full match	No results	6.06208e+06	9.40431e+06	5.48095e+06	2.84605e+06	3.72974e+06	5.01161e+06	1.00072e+07	1.09955e+07	4.6672e+06	6.09035e+06	2.41061e+07	3.73211e+06	6.39619e+06	6.55604e+06	6.385e+06	2.67399e+07	7.18573e+06	8.41521e+06	7.81484e+06	6.90351e+06	5.43934e+06	7.76998e+06	4.21235e+06	7.24679e+06	8.52136e+06	6.04813e+06	3.71057e+06	8.84689e+06	6.11773e+06	6.51462e+06	8.17898e+06	5.81812e+06	9.99771e+06	5.2533e+06	7.7402e+06	8.97194e+06	2.75834e+06	7.1721e+06	3.8995e+06	6.69893e+06	2.03307e+07
Com_3699_pos	gamma-Glutamylglutamine	C10 H17 N3 O6	275.112	1.326	276.12	No results	Full match	No results	2.14581e+07	3.66307e+07	1.12498e+07	1.82407e+07	1.66389e+07	1.46805e+07	1.11599e+07	1.9903e+07	8.33919e+06	2.22532e+07	1.37404e+07	2.33713e+07	3.42864e+07	1.44872e+07	6.28905e+06	2.67271e+07	1.21438e+07	1.19811e+07	1.1469e+07	1.19932e+07	1.46853e+07	8.89614e+06	1.09539e+06	1.31771e+07	3.25395e+07	8.64215e+06	1.09578e+07	1.91616e+07	2.3736e+07	1.18623e+07	2.11857e+07	1.23605e+07	2.41894e+07	1.16037e+07	1.20475e+07	8.45716e+06	1.15196e+07	1.96441e+07	2.04702e+07	1.54622e+07	1.87727e+07
Com_369_pos	L-Histidine	C6 H9 N3 O2	155.07	1.156	156.077	Full match	Full match	Full match	6.2354e+08	4.40988e+08	4.49152e+08	5.85704e+08	3.42299e+08	347348116	4.16547e+08	4.73318e+08	3.80799e+08	6.06998e+08	5.2459e+08	4.46056e+08	5.4858e+08	5.99228e+08	5.25106e+08	3.54879e+08	4.11905e+08	5.0423e+08	5.35132e+08	4.5309e+08	4.44405e+08	4.6681e+08	9.09476e+08	4.69071e+08	491381455	4.03733e+08	5.01518e+08	5.71168e+08	5.56664e+08	4.74545e+08	579417758	494591390	3.75931e+08	4.19098e+08	566274423	2.72211e+08	3.38647e+08	496012638	4.57951e+08	4.52119e+08	5.29818e+08
Com_3704_pos	PC (20:2/20:3)	C48 H86 N O8 P	835.612	16.799	836.619	No results	Full match	No results	2.39121e+07	1.87119e+07	2.68098e+07	3.12475e+07	1.48949e+07	1.47548e+07	1.56351e+07	2.84677e+07	1.2336e+07	4.0747e+07	1.80071e+07	2.64674e+07	1.54603e+07	1.75641e+07	2.10214e+07	1.27778e+07	1.59963e+07	1.78296e+07	2.37398e+07	2.73724e+07	2.57098e+07	2.63425e+07	1.27685e+07	3.07914e+07	2.31002e+07	2.36495e+07	2.32288e+07	2.50844e+07	1.68711e+07	1.09924e+07	1.83279e+07	1.78131e+07	2.45637e+07	3.76562e+07	1.25149e+07	1.47568e+07	4.26053e+06	2.25483e+07	1.63989e+07	3.28249e+07	1.27463e+07
Com_3710_pos	Oleic acid	C18 H34 O2	282.258	15.173	283.265	Invalid mass	No results	No results	1.8521e+07	6.39948e+06	9.6222e+06	9.30511e+06	9.97955e+06	7.88344e+06	8.61069e+06	1.05117e+07	6.60296e+06	9.64414e+06	1.15486e+07	9.59616e+06	9.63035e+06	8.37394e+06	1.10604e+07	7.10801e+06	6.99251e+06	1.23705e+07	9.73813e+06	9.2709e+06	6.92188e+06	1.07205e+07	2.43206e+07	9.65781e+06	8.73629e+06	8.92211e+06	6.53357e+06	8.79845e+06	7.27221e+06	1.53921e+07	9.1502e+06	9.43632e+06	5.75787e+06	6.02643e+06	2.05591e+07	7.35377e+06	1.14145e+07	1.3027e+07	6.2738e+06	6.73928e+06	1.05621e+07
Com_372_pos	SM (d16:3/24:0)	C45 H87 N2 O6 P	782.629	16.078	805.617	No results	Full match	No results	8.42104e+08	9.2126e+08	1241077353	1437461111	5.00686e+08	6.71432e+08	6.42705e+08	1051185163	6.15139e+08	1286227532	8.00765e+08	9.29988e+08	7.05241e+08	8.96079e+08	27594892	6.84439e+08	639197783	7.01296e+08	8.32239e+08	1069449875	7.56993e+08	2.69303e+07	4.53074e+08	8.8522e+08	1088114539	7.57781e+08	1213795109	1233280880	1064696505	8.63569e+08	1130046205	8.80741e+08	1147041297	1119302960	5.69567e+08	5.9926e+08	3.75209e+08	8.99655e+08	8.61729e+08	1020267120	7.51473e+08
Com_3734_pos	ACar 16:1	C23 H44 N O4	397.32	13.119	398.327	No results	Invalid mass	No results	3.52689e+07	2.21177e+07	1.39943e+07	1.23543e+07	6.58126e+06	8.45121e+06	7.03582e+06	1.94355e+07	9.20895e+06	1.86159e+07	1.33043e+07	2.45659e+07	2.61302e+07	1.93928e+07	7.43735e+06	9.09982e+06	7.82025e+06	4.02972e+07	1.24108e+07	1.33318e+07	1.20104e+07	1.24095e+07	4.41784e+06	2.39475e+07	1.3629e+07	1.42635e+07	9.7692e+06	8.98135e+06	1.0117e+07	1.05916e+07	1.11953e+07	9.85025e+06	1.24276e+07	8.687e+06	1.15738e+07	1.0419e+07	1.26971e+07	2.10331e+07	1.88604e+07	8.57489e+06	9.55636e+06
Com_3832_pos	Kojic acid	C6 H6 O4	142.024	1.238	143.031	Invalid mass	No results	No results	2.3446e+07	3.46341e+07	2.99247e+07	2.66203e+07	2.07618e+07	2.07863e+07	1.78285e+07	2.80378e+07	2.1911e+07	2.28992e+07	2.48872e+07	3.58163e+07	3.68732e+07	2.74974e+07	2.5345e+07	1.78716e+07	2.32211e+07	2.95645e+07	2.7149e+07	2.0256e+07	2.72667e+07	2.61373e+07	6.18611e+06	3.15322e+07	3.09291e+07	2.78009e+07	3.92161e+07	3.35728e+07	4.818e+07	2.95712e+07	4.03017e+07	3.47684e+07	3.43454e+07	3.52156e+07	2.66939e+07	2.45365e+07	2.59578e+07	2.9472e+07	3.62203e+07	2.72978e+07	3.18206e+07
Com_3866_pos	Propionyl-L-carnitine	C10 H19 N O4	217.132	10.753	218.139	No results	No results	Full match	4.97185e+06	4.26867e+06	3.49843e+06	3.5336e+06	1.89332e+07	1.46554e+07	3.25001e+06	2.99949e+06	6.3052e+06	3.36489e+06	3.61956e+06	4.32483e+06	4.46925e+06	3.36216e+06	3.42553e+06	2.38816e+07	1.09992e+07	3.15586e+06	4.05215e+06	3.3857e+06	2.96801e+06	3.91626e+06	6.127e+06	4.31472e+06	3.18603e+07	3.37285e+06	4.01213e+06	4.69658e+06	4.90494e+06	3.65024e+06	4.23638e+06	3.64132e+06	3.99312e+06	4.46886e+06	4.25431e+06	3.52619e+06	2.17911e+07	7.46152e+06	5.31216e+06	1.5428e+07	2.59688e+07
Com_387_pos	SM (d17:0/19:1)	C41 H83 N2 O6 P	730.6	15.621	731.607	No results	Full match	No results	9.53122e+08	7.20605e+08	1018207621	8.04692e+08	4.17351e+08	3.54765e+08	7.99962e+08	8.03136e+08	3.57836e+08	6.53432e+08	1476704654	9.57919e+08	6.91365e+08	830508032	6.77287e+08	5.38861e+08	7.08704e+08	6.74207e+08	1000158526	7.86465e+08	6.03598e+08	7.6494e+08	4.98988e+08	8.23336e+08	1374640744	9.11316e+08	5.56245e+08	1154426931	8.5376e+08	6.00332e+08	9.62884e+08	6.09181e+08	7.18812e+08	6.03708e+08	7.64376e+08	6.34346e+08	3.40187e+08	1015711667	7.3867e+08	5.54136e+08	7.36933e+08
Com_3888_pos	3-Acetyl-11-keto-β-boswellic acid	C32 H48 O5	512.348	15.146	513.356	Full match	No results	No results	2.9448e+07	2.29045e+07	2.94008e+07	2.39972e+07	6.93019e+06	6.68907e+06	8.37765e+06	1.88646e+07	1.82643e+07	1.63467e+07	2.54565e+07	2.1157e+07	3.84707e+07	3.4502e+07	8.05116e+06	1.74961e+07	2.29051e+07	2.1953e+07	2.14186e+07	3.35024e+07	2.02603e+07	3.68667e+07	1.55232e+07	2.92649e+07	2.50067e+07	3.16461e+07	3.22712e+07	1.97827e+07	1.71809e+07	1.99004e+07	2.28519e+07	2.17285e+07	3.79606e+07	2.27692e+07	2.30733e+07	8.73822e+06	2.04143e+07	1.88633e+07	3.30997e+07	1.04393e+07	1.4849e+07
Com_3903_pos	Glycochenodeoxycholic acid sodium salt	C26 H43 N O5 Na	472.305	13.054	473.312	No results	No results	Full match	3.26533e+06	3.29169e+06	3.26977e+06	3.1863e+06	1.73877e+07	1.31598e+07	1.53558e+07	2914199	1.3865e+07	3.28776e+06	3.3723e+06	3.28679e+06	3.43514e+06	3.14886e+06	3.06495e+06	9.26335e+06	3.03149e+06	3.14458e+06	3.29045e+06	2.65839e+06	3.11612e+06	3.03844e+06	2.01397e+06	3.28819e+06	3.0269e+06	2.88077e+06	5.75715e+06	6.07378e+06	6.56048e+06	4.87056e+06	5.0241e+06	4.9281e+06	5.0574e+06	4.61403e+06	4.45075e+06	1.81879e+07	1.39929e+07	3.83438e+06	3.89323e+06	1.50633e+07	1.14597e+07
Com_3929_pos	N-lactoyl-phenylalanine	C12 H15 N O4	237.101	9.435	238.108	No results	No results	Full match	4.91158e+06	6.92287e+06	5.48809e+06	7.19698e+06	4.1306e+06	3.59315e+06	4.34659e+06	4.81586e+06	5.35896e+06	5.11818e+06	8.5996e+06	5.25706e+06	5.80679e+06	5.12579e+06	4.7197e+06	3.99608e+06	5.31452e+06	5.41906e+06	5.60831e+06	5.13152e+06	5.07142e+06	6.48448e+06	2.22808e+07	5.32193e+06	4.74241e+06	5.27603e+06	8.3469e+06	7.27968e+06	6.61276e+06	6.48587e+06	5.93484e+06	7.28382e+06	5.68415e+06	5.52794e+06	5.78081e+06	5.27601e+06	4.40461e+06	4.87675e+06	4.74654e+06	4.43226e+06	5.65589e+06
Com_394_pos	1-(4-hydroxyphenyl)propane-1,2-diol	C9 H12 O3	150.069	7.757	151.076	Invalid mass	No results	No match	2.88741e+07	3.01701e+07	3.238e+07	2.70664e+07	4.01178e+08	448514009	5.35984e+08	2.50995e+07	2.70332e+08	2.98598e+07	2.91341e+07	2.85285e+07	3.29643e+07	2.61824e+07	227633757	4.65471e+08	2.23091e+08	2.70865e+07	2.87424e+07	2.34966e+07	2.37622e+07	2.52673e+07	5.37397e+08	3.0754e+07	1.14814e+08	8.45827e+07	3.59196e+07	3.69818e+07	3.84887e+07	3.23704e+07	3.47653e+07	3.13148e+07	3.31393e+07	1.49421e+08	3.1281e+07	5.02153e+08	7.46841e+08	3.74857e+08	1.46502e+08	2.44776e+08	1167856734
Com_3958_pos	PC (14:1e/22:4)	C44 H80 N O7 P	765.568	13.808	766.576	No results	Full match	No results	6.42231e+06	1.26206e+07	9.87683e+06	4.62745e+06	3.01351e+06	5.18578e+06	1.10726e+07	9.52546e+06	1.00164e+07	3.79433e+07	6.56399e+06	9.98267e+06	1.59104e+07	7.76189e+06	6.20343e+06	9.25072e+06	1.07155e+07	7.19156e+06	4.65203e+06	7.64853e+06	1.30148e+07	1.05629e+07	6.62544e+06	1.45666e+07	1.0462e+07	7.33147e+06	9.68188e+06	8.58041e+06	1.0963e+07	9.12148e+06	1.4174e+07	1.2568e+07	1.30638e+07	8.86936e+06	9.5585e+06	9.8464e+06	3.09941e+06	9.41235e+06	4.67311e+06	6.25978e+06	1.14432e+07
Com_4045_pos	N1-isopropyl-2-(1H-2-pyrrolylcarbonyl)-1-hydrazinecarboxamide	C9 H14 N4 O2	210.11	1.166	211.117	Invalid mass	No results	No results	9.61891e+06	5.85175e+06	1.2898e+07	9.4249e+06	1.71697e+07	1.32082e+07	1.12734e+07	1.52698e+07	1.38909e+07	1.21116e+07	2.19747e+07	1.26309e+07	1.23212e+07	8.862e+06	1.03549e+07	8.47833e+06	1.86616e+07	1.12145e+07	1.28367e+07	1.1869e+07	8.32677e+06	1.09144e+07	2.70484e+06	2.453e+07	1.9485e+07	9.66501e+06	1.31633e+07	9.51019e+06	2.91526e+07	1.13746e+07	2.13116e+07	1.09365e+07	1.33768e+07	2.82679e+07	1.15122e+07	3.28467e+06	7.78072e+06	1.62479e+07	7.16638e+06	6.87849e+06	9.69904e+06
Com_4048_pos	L-Cystathionine	C7 H14 N2 O4 S	222.068	1.269	223.075	No results	No results	Full match	2.40153e+06	2.27258e+06	2.50184e+06	2.35988e+06	1.68715e+06	1.67896e+06	1.74904e+06	2.18734e+06	1.80509e+06	2.44559e+06	2.33635e+06	2.64386e+06	3.04866e+06	2.58211e+06	2.40639e+06	1.62745e+06	2.18573e+06	2.42274e+06	2.82487e+06	2.17643e+06	2.42329e+06	2.72421e+06	2.13654e+07	2.91956e+06	2.28908e+06	2.785e+06	2.26302e+06	2.33927e+06	2.56898e+06	1.8593e+06	2.18325e+06	2.41831e+06	2.2766e+06	2.42802e+06	2.0811e+06	1.58679e+06	1.70904e+06	2.15514e+06	2.41311e+06	2.05023e+06	1.95025e+06
Com_405_pos	Xanthine	C5 H4 N4 O2	152.034	1.96	153.041	Full match	Full match	Full match	1.37984e+08	9.98332e+07	6.80613e+07	8.12373e+07	58962016	6.4959e+07	50514853	1.02934e+08	1.30341e+08	1.07497e+08	1.54296e+08	1.00808e+08	1.37179e+08	1.01704e+08	8.79099e+06	7.04541e+07	8.47484e+07	101880278	1.00103e+08	6.53757e+07	1.0441e+08	7.45235e+07	8.0279e+08	1.11071e+08	6.72802e+07	6.29951e+07	1.07733e+08	1.0903e+08	9.61741e+07	1.1375e+08	142803905	1.10787e+08	1.1162e+08	8.43616e+07	136595639	9.30096e+07	1.08075e+08	9.6904e+07	8.05223e+07	8.13076e+07	1.05727e+08
Com_406_pos	PC (16:1e/18:2)	C42 H80 N O7 P	741.568	15.443	742.576	No results	Full match	No results	5.79979e+08	4.35622e+08	1011046259	5.55209e+08	3.74275e+08	3.76799e+08	4.18647e+08	6.70042e+08	4.65664e+08	6.77418e+08	9.12814e+08	7.11437e+08	5.40872e+08	9.45989e+08	7.21042e+08	402642678	8.422e+08	4.67355e+08	5.49378e+08	6.3074e+08	4.43207e+08	6.60105e+08	7.97886e+08	5.93517e+08	8.55651e+08	3.96738e+08	8.48421e+08	7.53616e+08	7.41214e+08	661363895	7.42488e+08	8.4987e+08	619441257	5.72206e+08	1174829300	3.87271e+08	4.95402e+08	7.9468e+08	5.05843e+08	6.48575e+08	2.81319e+08
Com_4086_pos	PC (20:3e/18:0)	C46 H88 N O7 P	797.631	15.628	798.64	No results	Full match	No results	2.59226e+07	1.99554e+07	2.87699e+07	2.0353e+07	1.05504e+07	8.19916e+06	1.30484e+07	2.28481e+07	2.56114e+07	2.6884e+07	2.7294e+07	1.65861e+07	1.55194e+07	1.17653e+07	1.8179e+07	2.23689e+07	2.60146e+07	2.14971e+07	1.60164e+07	1.25307e+07	1.1434e+07	2.21992e+07	2.10324e+07	2.85146e+07	2.96408e+07	2.22161e+07	1.17777e+07	1.30906e+07	1.95079e+07	1.31763e+07	2.65272e+07	3.41145e+07	24275346	1.03281e+07	1.11257e+07	9.58831e+06	1.09577e+07	1.95136e+07	1.86678e+07	9.20026e+06	1.12491e+07
Com_410_pos	Homoserine	C4 H9 N O3	119.059	1.255	120.066	No results	Full match	Full match	2.99367e+08	2.49649e+08	2.7681e+08	3.17085e+08	3.17213e+08	2.92043e+08	2.67735e+08	2.61803e+08	2.69701e+08	350248428	3.92538e+08	2.96984e+08	504599505	3.41849e+08	3.25236e+08	3.28685e+08	2.41583e+08	6.19673e+08	4.49043e+08	3.98766e+08	2.51961e+08	3.11097e+08	790923436	5.71369e+08	3.38449e+08	2.30977e+08	2.89212e+08	3.94214e+08	414126462	2.82402e+08	2.90339e+08	2.46485e+08	2.68543e+08	4.16991e+08	2.97927e+08	170796337	2.04228e+08	3.55694e+08	2.35692e+08	2.63198e+08	4.20687e+08
Com_4124_pos	PC (16:1e/22:6)	C46 H80 N O7 P	789.567	16.811	790.574	No results	Full match	No results	1.67723e+07	1.28551e+07	3.43142e+07	1.61355e+07	1.17548e+07	1.64596e+07	1.50221e+07	6.3033e+06	1.32799e+07	1.6255e+07	2.20184e+07	2.14813e+07	2.08322e+07	1.70936e+07	2.00895e+07	1.16259e+07	1.70132e+07	2.04957e+07	2.07243e+07	1.34838e+07	2.11843e+07	1.95661e+07	1.14013e+07	2.1537e+07	1.47016e+07	1.3654e+07	1.79296e+07	2.02515e+07	2.1557e+07	1.50895e+07	1.81538e+07	1.97129e+07	1.91382e+07	1.9189e+07	2.70753e+07	1.34361e+07	1.29141e+07	2.04422e+07	2.00708e+07	8.36061e+06	1.67994e+07
Com_412_pos	PC (17:0/17:0)	C42 H84 N O8 P	761.584	15.381	762.591	No results	Invalid mass	No results	1066445711	8.25037e+08	3.18045e+08	4.72393e+08	4.34809e+08	4.73656e+08	4.5102e+08	9.78667e+08	5.31646e+08	7.88188e+08	6.46933e+08	7.01116e+08	8.01247e+08	9.31425e+08	5.69924e+08	5.05631e+08	5.20689e+08	5.99471e+08	5.73144e+08	7.56308e+08	6.43683e+08	6.76876e+08	7.86894e+08	9.29247e+08	9.47152e+08	8.08389e+08	9.21645e+08	9.08323e+08	8.03807e+08	5.81541e+08	1135922583	7.04237e+08	7.27706e+08	6.35763e+08	6.12939e+08	5.66086e+08	3.82446e+08	9.05116e+08	5.88932e+08	7.24409e+08	3.39543e+08
Com_413_pos	L-Pyroglutamic acid	C5 H7 N O3	129.043	2.299	130.05	Full match	Full match	Full match	2.772e+08	1.96416e+08	2.73331e+08	2.69185e+08	1.40935e+08	1.33917e+08	1.89604e+08	2.08186e+08	1.73888e+08	2.16471e+08	2.80074e+08	1.70646e+08	1.76511e+08	2.89381e+08	2.35165e+08	1.35759e+08	1.50141e+08	2.72234e+08	2.39723e+08	2.13281e+08	2.20491e+08	2.67254e+08	7.84171e+08	1.77872e+08	1.4716e+08	2.90791e+08	1.59576e+08	2.38898e+08	1.662e+08	267232422	1.64502e+08	1.85517e+08	1.74668e+08	1.87694e+08	2.61816e+08	1.84334e+08	138550512	1.59873e+08	1.49254e+08	1.50643e+08	1.44518e+08
Com_4165_pos	N3,N4-Dimethyl-L-arginine	C8 H18 N4 O2	202.143	1.338	203.151	Full match	Full match	Full match	2.7281e+07	2.42316e+07	1.99357e+07	2.5522e+07	2.27661e+07	2.06426e+07	2.05319e+07	2.38666e+07	1.99947e+07	2.23648e+07	2.54622e+07	2.15244e+07	3.01537e+07	2.47941e+07	2.47134e+07	1.62921e+07	1.85893e+07	2.26403e+07	2.41819e+07	2.35459e+07	2.37438e+07	2.45926e+07	1.52704e+07	2.94698e+07	2.20294e+07	2.11689e+07	1.68728e+07	1.26721e+07	1.9765e+07	1.04944e+07	1.23564e+07	1.41726e+07	1.93516e+07	1.85642e+07	1.62892e+07	1.28208e+07	1.71416e+07	2.10905e+07	2.00229e+07	1.54583e+07	1.90569e+07
Com_4177_pos	2-(14,15-Epoxyeicosatrienoyl) glycerol	C23 H38 O5	394.271	14.088	395.279	Full match	No results	Full match	5.83589e+06	5.27024e+06	5.15223e+06	6.14874e+06	1.38529e+07	1.2464e+07	3.91851e+06	6.00965e+06	1.17758e+07	6.32674e+06	7.16745e+06	6.42327e+06	7.5101e+06	7.47622e+06	9.53704e+06	1.98744e+07	1.42464e+07	6.63639e+06	1.07405e+07	7.78874e+06	7.72689e+06	6.40282e+06	1.48306e+07	6.07412e+06	8.75387e+06	6.81729e+06	6.38349e+06	5.91292e+06	8.11488e+06	6.07862e+06	7.61721e+06	6.47148e+06	6.83665e+06	6.48386e+06	7.39302e+06	1.31561e+07	1.52142e+07	1.08367e+07	7.88591e+06	1.32146e+07	1.23975e+07
Com_4181_pos	PC (16:1e/16:0)	C40 H80 N O7 P	717.567	15.51	718.575	No results	Full match	No results	1.57385e+07	1.83883e+07	2.06465e+07	1.44942e+07	1.23111e+07	9.85247e+06	1.15946e+07	2.38503e+07	1.008e+07	1.37071e+07	2.1728e+07	2.22251e+07	1.82336e+07	1.64623e+07	1.97728e+07	1.13906e+07	1.58869e+07	3.37475e+07	2.22171e+07	1.5926e+07	1.32402e+07	1.57485e+07	1.41622e+07	2.13353e+07	1.38904e+07	2.16056e+07	2.0789e+07	1.76928e+07	2.01404e+07	1.67751e+07	1.72749e+07	2.10316e+07	1.42112e+07	1.44496e+07	1.72807e+07	1.35479e+07	1.07634e+07	1.64469e+07	1.71148e+07	1.31229e+07	1.22648e+07
Com_418_pos	Pipecolic acid	C6 H11 N O2	129.079	1.626	130.087	Full match	Full match	Full match	1120199915	7.01812e+08	6.40999e+08	7.96218e+08	5.14099e+08	4.34475e+08	8.7464e+08	749806038	2.39572e+08	5.28844e+08	5.56445e+08	7.69229e+08	1149862081	5.76284e+08	7.20953e+08	5.97616e+08	4.6112e+08	6.55008e+08	4.6158e+08	6.24334e+08	3.46931e+08	2.99617e+08	1.97976e+08	3.45816e+08	4.53469e+08	1185477508	5.88916e+08	6.35775e+08	6.47556e+08	1151526341	6.12362e+08	4.07869e+08	8.39024e+08	6.78521e+08	4.02418e+08	3.27462e+08	2.51854e+08	8.37693e+08	5.32356e+08	6.53835e+08	6.73418e+08
Com_419_pos	tetranor-PGFM	C16 H26 O7	312.155	10.08	313.163	Invalid mass	No results	No results	1.75711e+06	1.17122e+06	1.35971e+06	1.42675e+06	7.16446e+08	8.69889e+08	3.42282e+08	1.29454e+06	4.04164e+08	1.11085e+06	1.38316e+06	1.15396e+06	1.55059e+06	1.16369e+06	1.4371e+08	8.04158e+08	3.08559e+08	1.40548e+06	1.5458e+06	1.08476e+06	1.27429e+06	1.24462e+06	6.64628e+08	1.43596e+06	5.25504e+08	5.69378e+07	1.23438e+06	1.1764e+06	1.34352e+06	1.24789e+06	1.41322e+06	1.0301e+06	991759	5.97731e+07	1.10291e+06	3.00193e+08	8.31267e+08	2.54767e+08	100603640	6.29562e+08	7.21134e+08
Com_4218_pos	N-{[2-(2-thienyl)-1,3-thiazol-4-yl]methyl}benzamide	C15 H12 N2 O S2	300.033	1.746	301.04	Invalid mass	No results	No results	1.50072e+06	1.91511e+06	1.75005e+06	1.78708e+06	4.6439e+06	2.83263e+06	2.84563e+06	1.47413e+06	7.17643e+06	1.83035e+06	2.31872e+06	1.6728e+06	1.41729e+06	1.16659e+06	1.71533e+06	3.57949e+06	4.50075e+06	1.61894e+06	1.42779e+06	1.86811e+06	2.24205e+06	1.64461e+06	1.99023e+07	1.71584e+06	980941	1.28143e+06	2.24003e+06	1.76086e+06	948753	1.52907e+06	1.34905e+06	2.90452e+06	1.33474e+06	1.42016e+06	2.05914e+06	5.18318e+06	3.87266e+06	2.4184e+06	1.63075e+06	2.05241e+06	6.50881e+06
Com_4237_pos	3-[4-methyl-1-(2-methylpropanoyl)-3-oxocyclohexyl]butanoic acid	C15 H24 O4	268.166	12.253	269.173	Invalid mass	No results	No results	6.31011e+06	7.42212e+06	6.87873e+06	5.60652e+06	5.04159e+06	5.72754e+06	6.01584e+06	3.02068e+07	4.9912e+06	7.1908e+06	8.07801e+06	9.1632e+06	8.80667e+06	7.39055e+06	7.72473e+06	5.40041e+06	8.14948e+06	8.50265e+06	8.22426e+06	5.63046e+06	6.77239e+06	7.57651e+06	5.844e+06	10300700	7.84928e+06	7.0034e+06	7.16336e+06	6.37361e+06	7.63494e+06	2.31403e+07	6.65723e+06	6.48099e+06	1.79793e+06	7.21217e+06	6.01535e+06	5.67324e+06	6.07083e+06	6.41914e+06	7.43267e+06	5.1846e+06	5.74995e+06
Com_424_pos	L-Glutamic acid monosodium salt	C5 H8 N Na O4	169.035	1.258	170.043	No results	No results	Full match	2.24052e+08	1.92199e+08	1.97709e+08	1.83429e+08	1.18306e+08	1.08735e+08	123616191	1.44811e+08	247051860	1.97082e+08	2.84155e+08	1.08485e+08	108698677	2.14757e+08	3.63224e+08	8.70183e+07	1.18481e+08	2.83121e+08	2.20487e+08	207925164	207647509	2.36568e+08	7.64723e+08	1.85326e+08	7.52209e+07	2.25266e+08	2.24241e+08	1.78036e+08	1.19258e+08	1.89801e+08	1.24729e+08	1.68699e+08	1.40054e+08	1.65459e+08	2.05518e+08	1.62111e+08	1.58873e+08	1.31553e+08	1.33263e+08	1.36829e+08	1.59552e+08
Com_42_pos	PC (18:1/18:2)	C44 H82 N O8 P	783.578	15.153	784.586	No results	Full match	No results	14462815614	11388048567	12995844021	13756783837	8683535748	9579901213	13718163865	10882414231	6728009180	14032436455	10893020859	12749717872	11930913274	12513394700	11420358227	5144617885	10962386530	10507135863	16071513708	12464264214	13814582990	9474582655	5865481428	12024248836	11630921949	14134079703	14502539402	14995021677	11244655336	12562675046	14390413641	11057825638	20114867493	16074875550	11432749914	8534404982	6851253990	13312163666	9526249246	11575585175	8069869105
Com_4320_pos	DL-Panthenol	C9 H19 N O4	205.132	6.384	206.139	No results	No results	Full match	3.12438e+06	1.91251e+06	2.60073e+06	1.95424e+06	4.3252e+06	1.58095e+06	3.24994e+06	2.1128e+06	1.56799e+06	2.62218e+06	2.04464e+06	2.59047e+06	2.09405e+06	1.7948e+06	1.90457e+06	1.15722e+06	1.47303e+06	1.69237e+06	2.81586e+06	1.73008e+06	1.81852e+06	1.60125e+06	1.22612e+06	2.47857e+06	2.27917e+06	1.69045e+06	2.2812e+06	2.28919e+06	1.4803e+07	2.34796e+06	2.37784e+06	1.86798e+06	2.37036e+06	2.46512e+06	2.24435e+06	1.72885e+06	1.33086e+06	3.89901e+06	3.40654e+06	1.76937e+06	1.83686e+06
Com_4373_pos	PC (16:1e/22:2)	C46 H88 N O7 P	797.623	15.348	798.63	No results	Invalid mass	No results	2.26317e+07	1.09352e+07	9.40312e+06	1.01469e+07	5.3241e+06	4.34208e+06	7.4585e+06	1.03202e+07	2.34121e+07	11557374	1.23008e+07	8.34946e+06	3.43787e+06	3.6573e+06	1.10087e+07	6.5043e+06	1.11675e+07	7.79388e+06	1.18596e+07	9.84561e+06	9.54533e+06	1.03962e+07	8.05857e+06	1.30875e+07	1.77927e+07	1.42782e+07	7.64822e+06	8.7872e+06	1.11013e+07	8.88132e+06	5.75208e+06	8.33569e+06	9.91284e+06	8.54746e+06	8.27853e+06	4.56361e+06	7.61553e+06	4.88685e+06	1.11114e+07	5.24925e+06	1.00462e+07
Com_4380_pos	1-(2-furyl)pentane-1,4-dione	C9 H10 O3	188.045	8.941	189.053	Invalid mass	No results	No results	7.18385e+06	9.86276e+06	5.99851e+06	8.77548e+06	3.6283e+06	3.91607e+06	4.70618e+06	5.48217e+06	5.08912e+06	6.7432e+06	7.04771e+06	6.99705e+06	9.57294e+06	7.13026e+06	6.36807e+06	4.1239e+06	5.8209e+06	6.67428e+06	6.45341e+06	5.08172e+06	6.83046e+06	6.34806e+06	1.88251e+07	6.66687e+06	5.04865e+06	6.67401e+06	5.07228e+06	5.95061e+06	5.18602e+06	7.43971e+06	5.93098e+06	6.01233e+06	5.67285e+06	5.73669e+06	6.62424e+06	4.13767e+06	4.5576e+06	6.88229e+06	6.5662e+06	5.11286e+06	6.25982e+06
Com_4382_pos	DL-α-Aminocaprylic acid	C8 H17 N O2	159.126	8.624	160.134	Full match	No results	Full match	9.0459e+06	7.92373e+06	8.4998e+06	8.2971e+06	9.45516e+06	6.61631e+06	1.13394e+07	1.27289e+07	7.54742e+06	1.04339e+07	8.07162e+06	1.41736e+07	1.48439e+07	1.92731e+07	1.78777e+07	6.26975e+06	5.53647e+06	9.76744e+06	1.35779e+07	1.28985e+07	7.759e+06	1.12228e+07	3.93306e+06	8.27165e+06	1.14962e+07	1.76757e+07	1.59636e+07	1.42468e+07	1.98481e+07	1.49032e+07	1.11574e+07	7.82486e+06	9.02705e+06	1.21492e+07	1.03038e+07	2.18807e+07	9.31025e+06	9.56782e+06	1.28366e+07	1.17093e+07	5.49064e+06
Com_439_pos	1-Stearoylglycerol	C21 H42 O4	358.309	15.297	359.316	Full match	Full match	No results	4.12491e+08	5.18238e+08	1.39343e+08	1.01621e+08	1.22582e+08	9.3662e+07	7.34164e+07	118812285	1.11594e+08	1.18248e+08	1.58377e+08	6.57198e+08	6.07427e+08	1.06016e+08	1104684987	7.88111e+07	1.10002e+08	1.32476e+08	109732827	3.90059e+08	102861931	1.04984e+08	2.43125e+08	4.8111e+08	473534905	3.6471e+08	1.66469e+08	1.61884e+08	7.39468e+08	137581886	2.39645e+08	2.18917e+08	6.26542e+08	5.40255e+08	1.45799e+08	8.5112e+07	3.17211e+07	6.36481e+08	1173171597	9.67501e+07	1.5087e+08
Com_4406_pos	PC (18:2e/20:2)	C46 H86 N O7 P	795.615	14.207	796.623	No results	Full match	No results	1.29543e+07	1.10649e+07	9.72941e+06	1.14555e+07	6.04628e+06	7.4995e+06	9.48625e+06	1.01183e+07	9.8418e+06	8.68563e+06	1.15605e+07	1.25704e+07	1.14828e+07	8.3523e+06	8.19948e+06	2.03444e+07	1.04856e+07	1.0636e+07	1.51734e+07	9.43561e+06	1.08405e+07	1.00496e+07	7.18321e+06	1.13736e+07	1.37588e+07	9.42849e+06	1.50408e+07	1.60719e+07	2.059e+07	8.98858e+06	9.87633e+06	1.26913e+07	1.62685e+07	1.40373e+07	1.27188e+07	6.39392e+06	4.70941e+06	5.64312e+06	1.27919e+07	7.8067e+06	2.65734e+06
Com_4447_pos	2-((Dimethylamino)methyl)phenol	C9 H13 N O	151.1	10.576	152.108	Full match	No results	No results	3.538e+06	2.99213e+06	3.21205e+06	3.05172e+06	1.01035e+07	8.56391e+06	1.02893e+07	2.84924e+06	1.55792e+07	3.72192e+06	3.19188e+06	3.08999e+06	3.46289e+06	2.73667e+06	6.77608e+06	1.32505e+07	7.7892e+06	2.86381e+06	3.71682e+06	2.68096e+06	3.06441e+06	2.65189e+06	1.82927e+07	3.12946e+06	7.26244e+06	7.13356e+06	5.75263e+06	5.67627e+06	5.73659e+06	4.78179e+06	4.46969e+06	4.63033e+06	4.21848e+06	6.98878e+06	4.5485e+06	1.13811e+07	1.90577e+07	1.08445e+07	5.71438e+06	1.00757e+07	1.17523e+07
Com_4458_pos	5-Hydroxytryptophan	C11 H12 N2 O3	220.085	6.511	221.093	No results	No results	Full match	2.04882e+07	2.23693e+07	2.11798e+07	2.45238e+07	1.50809e+07	1.40461e+07	1.31015e+07	1.51682e+07	1.77692e+07	2.34276e+07	2.11995e+07	2.36866e+07	2.38697e+07	2.17356e+07	1.85777e+07	1.47025e+07	2.07099e+07	2.14592e+07	1.87579e+07	1.98726e+07	1.86413e+07	2.01853e+07	1.82293e+07	2.36248e+07	2.04613e+07	2.045e+07	1.8411e+07	2.3566e+07	3.30281e+07	2.05234e+07	2.19459e+07	2.42839e+07	2.0744e+07	2.39008e+07	2.06799e+07	1.29073e+07	1.27264e+07	2.01561e+07	1.9061e+07	1.90054e+07	1.52266e+07
Com_4493_pos	5-Hydroxymethyluracil	C5 H6 N2 O3	142.038	1.044	143.046	No results	No results	Full match	3.90315e+06	4.55833e+06	4.05573e+06	1.84505e+06	2.70908e+06	2.79577e+06	3.3472e+06	3.05573e+06	3.21212e+06	5.1741e+06	5.20902e+06	3.01737e+06	4.11105e+06	3.64449e+06	3.71615e+06	2.74036e+06	3.40947e+06	4.63735e+06	4.36293e+06	3.00529e+06	3.08018e+06	3.81463e+06	2.21544e+06	4.25201e+06	3.58939e+06	3.10721e+06	5.04566e+06	6.08494e+06	6.59513e+06	4.97356e+06	3.24716e+07	5.64171e+06	3.99698e+06	4.49191e+06	4.24229e+06	3.06488e+06	2.46151e+06	3.32665e+06	4.7557e+06	3.03796e+06	3.31482e+06
Com_44_pos	Inositol	C6 H12 O6	180.064	1.344	203.053	No results	No results	Full match	12985909845	13306410311	14515903913	13261866792	2652715017	10172751863	9653547329	12952668054	9778742138	13872739011	12413870816	17121537410	18010386645	13978443149	14028314765	9265966456	12440574142	13284017955	15520616337	15221856166	13704693339	17222274606	2.62025e+07	16816325831	13983971579	18723325023	5181663484	16628044373	6106067562	12582609089	16541747486	4444259557	16311370878	18329368101	13162578639	10927859380	2545657668	3848395537	16331980102	13008022529	12510781719
Com_4511_pos	ACar 7:0	C14 H28 N O4	273.195	9.211	274.202	No results	Invalid mass	No results	2.32855e+06	1.72024e+06	2.04024e+06	2.27552e+06	1.87856e+06	1.52091e+06	1.71142e+06	6.61006e+06	3.32022e+06	3.01125e+06	3.14301e+06	3.96103e+06	2.68427e+06	1.22643e+06	1.57611e+06	1.56876e+06	1.80677e+06	4.60245e+06	1.99717e+06	1.9052e+06	2.25171e+06	2.05977e+06	5.26283e+06	4.93124e+06	3.67721e+06	2.52389e+06	4.07038e+06	2.68714e+06	3.02044e+06	2.40962e+06	2.79518e+06	2.18834e+06	1.76061e+07	2.07136e+06	2.66723e+06	2.02092e+06	2.09199e+06	3.45259e+06	2.24602e+06	2.34866e+06	1.67219e+06
Com_4552_pos	1,4-dihydroxy-1,4-dimethyl-7-(propan-2-ylidene)-decahydroazulen-6-one	C15 H24 O3	274.157	14.291	275.164	Invalid mass	No results	No results	7.70433e+06	9.3935e+06	7.55449e+06	1.09097e+07	838688	1.07378e+06	1.11552e+06	1.40874e+07	882513	1.69693e+07	1.15277e+07	4.77821e+06	4.70309e+06	1.47794e+07	1.07304e+06	1.25425e+06	1.93367e+06	1.81892e+07	1.08178e+07	1.68877e+07	2.61772e+07	1.02416e+07	697734	4.16074e+06	1.12437e+06	1.06022e+06	3.60502e+06	7.02371e+06	4.32288e+06	1.43542e+07	4.6477e+06	1.47874e+07	5.46936e+06	1.3798e+06	1.53896e+07	1.26978e+06	1.03696e+06	1.7475e+06	1.92487e+06	1.45474e+06	1.22252e+06
Com_4580_pos	SM (d14:3/28:2)	C47 H87 N2 O6 P	806.633	16.78	807.64	No results	Full match	No results	1.39201e+07	2.13615e+07	2.26718e+07	2.29845e+07	1.60917e+07	1.46299e+07	2.15277e+07	2.44561e+07	1.65863e+07	2.38776e+07	1.80667e+07	2.06888e+07	1.49642e+07	1.76124e+07	1.92602e+07	1.27244e+07	1.64852e+07	2.64282e+07	1.89027e+07	2.02921e+07	1.48481e+07	1.94233e+07	7.32375e+06	1.85015e+07	2.19302e+07	1.6975e+07	1.44808e+07	1.71443e+07	2.62164e+07	1.85192e+07	2.82205e+07	1.44256e+07	1.54071e+07	1.97891e+07	2.46182e+07	9.37447e+06	1.11206e+07	2.04717e+07	9.1789e+06	7.8769e+06	9.17881e+06
Com_4612_pos	4-Hydroxytamoxifen	C26 H29 N O2	387.224	1.408	388.231	Invalid mass	No results	No results	816558	1.76337e+06	723891	746420	796835	1.37696e+06	585950	658572	616429	729136	691898	2.55181e+06	1.6084e+06	1.87881e+06	639147	458062	625581	729266	854164	1.73077e+06	641055	1.79776e+06	676353	751504	9.18731e+06	655971	1.22609e+06	1.10923e+06	5.73347e+06	889484	1.39462e+07	1.07272e+06	1.91043e+06	929937	841899	641076	643952	899093	1.60977e+06	708843	696493
Com_4656_pos	ACar 18:0	C25 H50 N O4	427.368	13.726	428.375	No results	Invalid mass	No results	2.72852e+07	2.04038e+07	1.60163e+07	1.67262e+07	8.32558e+06	1.13104e+07	9.83039e+06	2.30282e+07	1.4689e+07	1.48171e+07	1.45523e+07	29572687	2.26924e+07	1.59863e+07	1.00924e+07	1.22056e+07	8.83377e+06	26502320	1.32324e+07	1.53895e+07	1.92475e+07	1.84574e+07	4.89413e+06	1.54479e+07	2.19828e+07	2.21234e+07	1.42611e+07	1.17972e+07	1.7879e+07	2.15955e+07	1.21257e+07	1.4773e+07	2.00127e+07	1.50716e+07	1.58643e+07	1.01682e+07	9.94478e+06	1.91353e+07	1.37468e+07	1.3073e+07	8.1014e+06
Com_4665_pos	PC (18:4e/4:0)	C30 H54 N O7 P	571.365	14.889	572.373	No results	Full match	No results	2.20408e+07	2.70462e+07	1.86298e+07	2.19993e+07	6.83405e+06	6.45547e+06	5.85975e+06	2.29787e+07	9.36201e+06	1.44535e+07	4.95666e+06	1.27694e+07	1.12853e+07	2.04803e+06	1.33977e+07	1.45091e+07	1.57399e+07	1.73195e+07	1.83621e+07	1.98257e+07	1.74867e+07	2.6307e+07	1.13037e+07	2.11687e+07	1.08741e+07	2.49631e+07	1.74535e+07	8.30637e+06	9.09094e+06	1.32915e+07	1.26014e+07	2.71789e+07	1.05689e+07	8.78851e+06	1.12351e+07	7.61164e+06	1.25322e+07	2.15756e+07	7.39322e+06	1.07704e+07	1.51387e+07
Com_4731_pos	3-Methoxy prostaglandin F1α	C21 H38 O6	816.501	14.273	409.258	Invalid mass	No results	No results	1.95608e+06	1.67607e+06	2.14544e+06	4.6669e+06	1.50299e+07	1.66772e+07	3.58926e+06	3.55978e+06	1.62535e+07	4.33119e+06	2.66223e+06	1.20998e+06	1.19996e+06	4.01491e+06	2.04127e+06	1.79274e+07	7.40966e+06	5.15332e+06	2.98738e+06	3.3684e+06	7.59232e+06	3.59639e+06	684260	1.13401e+06	1.08537e+07	3.93515e+06	1.70624e+06	1.74189e+06	1.52844e+06	3.2866e+06	1.44487e+06	2.59639e+06	1.56023e+06	2.27127e+06	2.23283e+06	9.86477e+06	1.05137e+07	7.16709e+06	2.19212e+06	1.33356e+07	8.53817e+06
Com_4742_pos	Homo-Gamma-Linolenic Acid (C20:3)	C20 H34 O2	306.256	15.121	307.263	No results	No results	Full match	5.46616e+06	3.08854e+06	4.8428e+06	1.56352e+06	3.072e+06	1.48237e+06	1.80709e+06	4.67007e+06	2.28758e+06	3.19119e+06	3.08442e+06	2.48555e+06	3.82742e+06	3.16073e+06	4.31031e+06	1.18089e+06	2.81564e+06	2.65901e+06	3.05167e+06	2.98467e+06	2.78343e+06	3.41118e+06	1.63326e+07	3.23561e+06	3.75195e+06	3.62707e+06	2.60011e+06	2.88773e+06	2.46991e+06	3.32945e+06	1.57287e+06	3.78855e+06	3.05071e+06	2.51322e+06	2.79795e+06	2.68276e+06	2.19469e+06	4.65012e+06	2.9446e+06	1.72574e+06	2.05307e+06
Com_4770_pos	GRH	C14 H24 N8 O4	368.197	14.197	369.204	Invalid mass	No results	No results	7.58824e+06	8.77892e+06	8.04429e+06	9.80448e+06	1.32918e+06	1.27018e+06	1.59109e+06	1.11981e+07	1.34157e+06	1.63393e+07	8.88525e+06	3.28706e+06	3.92546e+06	1.52931e+07	1.60738e+06	1.21021e+06	1.52354e+06	2.06426e+07	1.09164e+07	1.87154e+07	2.50925e+07	9.88231e+06	1.16718e+06	3.8478e+06	1.78485e+06	1.55862e+06	3.20838e+06	6.41423e+06	2.73577e+06	1.20847e+07	2.58148e+06	1.64963e+07	5.08248e+06	2.27494e+06	1.38693e+07	1.8041e+06	1.42162e+06	1.97185e+06	2.1526e+06	1.76809e+06	1.61332e+06
Com_477_pos	SM (d19:2/23:1)	C47 H91 N2 O6 P	810.662	16.362	811.67	No results	Full match	No results	4.99371e+08	6.48181e+08	6.84657e+08	1045863143	5.47315e+08	416919478	4.51388e+08	6.33367e+08	7.23983e+08	5.84513e+08	4.92701e+08	9.69002e+08	8.40616e+08	3.91412e+08	5.11634e+08	4.19259e+08	7.62168e+08	7.61696e+08	6.47885e+08	7.95827e+08	3.78488e+08	4.34837e+08	4.00222e+08	707211207	741003705	6.7104e+08	8.84015e+08	1104745004	1133848674	5.38608e+08	7.03868e+08	7.90614e+08	7.532e+08	7.97267e+08	5.75444e+08	4.98897e+08	3.94453e+08	5.62768e+08	8.52864e+08	5.55542e+08	6.53689e+08
Com_4802_pos	PC (22:4e/18:2)	C48 H86 N O7 P	819.615	16.688	820.621	No results	Full match	No results	8.87798e+06	7.90069e+06	9.47279e+06	6.65122e+06	4.90897e+06	7.48599e+06	1.97352e+07	5.84994e+06	7.61301e+06	9.13985e+06	8.63057e+06	1.39107e+07	7.14589e+06	8.06672e+06	8.85211e+06	8.40621e+06	8.22123e+06	9.38276e+06	1.1199e+07	7.90572e+06	7.25631e+06	9.19733e+06	4.05979e+06	9.53762e+06	7.62045e+06	9.85059e+06	7.80908e+06	1.34295e+07	8.86134e+06	6.16187e+06	1.35017e+07	1.05434e+07	8.68744e+06	8.68513e+06	6.70003e+06	8.50376e+06	4.83293e+06	9.61444e+06	7.27542e+06	8.62781e+06	6.51401e+06
Com_4867_pos	Ecgonine	C9 H15 N O3	185.106	1.386	186.113	Full match	No results	No results	3.13496e+06	2.86681e+06	3.35791e+06	2.49822e+07	1.93182e+06	1.9228e+06	2.12896e+06	2.50686e+06	2.11749e+06	2.78397e+06	3.08909e+06	4.12396e+06	3.03234e+06	1.15985e+07	3.04252e+06	2.3187e+06	2.61832e+06	2.44857e+06	2.43727e+06	2.67174e+06	3.24423e+06	3.15801e+06	4.21138e+06	3.58165e+06	3.12136e+06	2.03431e+06	5.83138e+06	3.33128e+06	5.39781e+06	2.3288e+06	3.41138e+06	2.86223e+06	3.54542e+06	3.23988e+06	3.19491e+06	2.06486e+06	2.25787e+06	3.11018e+06	2.39585e+06	3.24793e+06	2.83999e+06
Com_487_pos	2-[(butylamino)(imino)methyl]-1-oxohydrazinium-1-olate	C5 H12 N4 O2	182.079	1.292	183.087	Invalid mass	No results	No match	4.76607e+07	1.6722e+07	7.02879e+06	1.07686e+07	3.87856e+06	1.63566e+07	6.66502e+06	1.01575e+07	6.69303e+06	1.02857e+07	1.97893e+07	8.4402e+06	1.07483e+07	1.19332e+07	6.96699e+06	3.96646e+06	1.25227e+07	5.21467e+06	6.31029e+06	1.15104e+07	5.43955e+06	9.82648e+06	6.24936e+08	4.21695e+06	2.732e+07	5.97064e+06	3.66623e+07	3.27514e+07	6.98553e+06	6.34145e+07	1.57356e+07	6.37582e+06	5.94067e+06	4.89812e+06	5.35135e+06	2.09824e+06	6.61436e+06	4.5447e+06	1.97331e+07	1.32336e+07	8.49429e+06
Com_4886_pos	PC (22:3e/17:0)	C47 H90 N O7 P	811.662	16.783	812.67	No results	Invalid mass	No results	1.0646e+07	14420550	1.46872e+07	1.85701e+07	1.2424e+07	9.78287e+06	8.41281e+06	1.33939e+07	1.57157e+07	1.46089e+07	1.21506e+07	2.52216e+07	1.75125e+07	1.10687e+07	1.42541e+07	11241792	1.82297e+07	1.69575e+07	1.82981e+07	2.31167e+07	8.51813e+06	1.24432e+07	1.18079e+07	2.31081e+07	1.72624e+07	1.77943e+07	2.17914e+07	2.33974e+07	2.2099e+07	8.75995e+06	1.12524e+07	1.39739e+07	1.44636e+07	1.87388e+07	1.53978e+07	9.85336e+06	6.0301e+06	1.12519e+07	2.3525e+07	1.48384e+07	1.59924e+07
Com_4895_pos	SM (d15:1/20:1)	C40 H79 N2 O6 P	714.568	15.915	715.575	No results	Full match	No results	1.47105e+07	1.49908e+07	1.19957e+07	9.45103e+06	1.22351e+07	1.58343e+07	1.17973e+07	11047676	1.90789e+07	1.66663e+07	9.2663e+06	6.91891e+06	1.83071e+07	1.38443e+07	1.05434e+07	7.30093e+06	9.40231e+06	1.48698e+07	1.97351e+07	6.04979e+06	1.28909e+07	1.50794e+07	5.65535e+06	1.87426e+07	1.39403e+07	1.009e+07	1.76309e+07	1.54154e+07	1.97819e+07	2.33554e+07	1.36331e+07	1.97898e+07	9.75838e+06	1.71107e+07	1.50825e+07	5.34964e+06	1.35617e+07	1.25739e+07	7.90003e+06	8.14698e+06	1.11467e+07
Com_4921_pos	SM (d14:0/21:1)	C40 H81 N2 O6 P	716.584	14.615	717.591	No results	Full match	No results	8.62347e+06	1.21593e+07	1.34914e+07	1.16715e+07	1.30057e+07	1.25391e+07	1.41146e+07	1.14122e+07	5.53879e+06	11008236	2.62131e+07	1.93988e+07	1.52663e+07	2.15674e+07	1.2036e+07	7.62238e+06	1.01332e+07	1.47285e+07	1.86421e+07	2.07636e+07	1.28324e+07	1.13888e+07	8.21075e+06	1.3843e+07	2.07835e+07	2.08416e+07	1.33195e+07	1.43684e+07	1.55083e+07	1.26467e+07	1.46585e+07	1.37435e+07	5.28335e+06	1.20571e+07	1.55104e+07	1.23065e+07	5.95728e+06	1.49858e+07	1.70458e+07	1.893e+07	1.32965e+07
Com_4948_pos	Palmitoleic Acid	C16 H30 O2	276.209	13.597	277.216	Invalid mass	No results	No results	2.51242e+06	2.55687e+06	2.77093e+06	2.8022e+06	1.60285e+06	1.63093e+06	2.36232e+06	2.91583e+06	1.83437e+06	2.5227e+06	2.49478e+06	3.00451e+06	3.31603e+06	3.27693e+06	2.29409e+06	1.67906e+06	2.10857e+06	2.88749e+06	3.50341e+06	2.43677e+06	3.20259e+06	2.83983e+06	1.50765e+07	3.10966e+06	2.76408e+06	2.48171e+06	3.18113e+06	3.99944e+06	2.90556e+06	2.91452e+06	2.88543e+06	3.56212e+06	3.12362e+06	2.76382e+06	2.18523e+06	1.95786e+06	2.5571e+06	3.1511e+06	2.82348e+06	2.9772e+06	2.23171e+06
Com_4955_pos	4-acetyl-4-(ethoxycarbonyl)heptanedioic acid	C12 H18 O7	274.104	6.844	275.111	Invalid mass	No results	No results	2.11765e+07	1.99414e+07	5.98167e+06	4.24845e+06	2.61299e+06	2.94856e+06	4.51693e+06	3.01019e+06	3.43792e+06	3.61841e+06	3.67683e+06	3.7941e+06	3.75749e+06	4.00308e+06	4.27605e+06	2.31961e+06	2.80256e+06	4.1358e+06	3.16854e+06	2.96704e+06	3.77518e+06	4.52597e+06	2.00779e+06	3.23266e+06	3.58829e+06	3.23471e+06	3.41112e+06	3.77733e+06	4.85189e+06	3.8903e+06	3.60658e+06	2.60685e+06	4.4146e+06	3.27938e+06	3.36512e+06	5.18467e+06	1.96976e+06	3.22359e+06	3.08595e+06	2.21924e+06	3.1265e+06
Com_4_pos	PC (14:0e/2:0)	C24 H50 N O7 P	495.333	14.743	496.34	No results	Full match	Full match	22242320659	28535072016	21130521632	38467628090	24356668128	17023467014	13717668006	22612479031	25235463273	20759851452	34579608441	25535433790	20795818633	25263697036	23423437021	23819505698	26641565917	36115438104	23630042491	64213947109	34635139223	35469987726	1316405576	22909518857	17203519418	29194366667	31116807461	30004130482	22249938040	29924688449	20200593632	30298073691	20453529797	27012307720	24772715785	18858910539	23783088318	16489366969	17133767044	17757321421	15160323552
Com_5077_pos	methyl 3,4,5-trihydroxycyclohex-1-ene-1-carboxylate	C8 H12 O5	210.051	6.973	211.058	Invalid mass	No results	No results	1.06252e+07	1.15647e+07	8.52663e+06	8.46562e+06	7.49572e+06	4.69095e+06	8.12441e+06	9.1009e+06	8.9494e+06	7.42957e+06	7.46886e+06	1.1456e+07	1.35245e+07	8.83879e+06	8.79353e+06	4.66125e+06	4.35001e+06	8.45254e+06	1.15146e+07	9.07745e+06	9.56784e+06	9.85608e+06	1.44172e+07	1.3615e+07	9.74286e+06	1.3202e+07	5.92044e+06	7.59808e+06	7.39304e+06	6.33452e+06	7.6608e+06	4.33056e+06	7.40257e+06	7.46026e+06	7.49977e+06	1.01703e+07	5.82065e+06	1.53931e+07	7.19092e+06	5.55551e+06	3.99628e+06
Com_514_pos	Decanoylcarnitine	C17 H33 N O4	315.242	11.538	316.249	Full match	Invalid mass	No results	9.111e+07	5.24116e+07	9.85446e+07	4.86041e+07	6.57068e+07	4.29759e+07	2.58124e+07	1.2612e+08	5.82389e+07	1.59994e+08	4.35132e+07	3.0307e+08	2.50581e+08	1.5828e+08	2.16934e+07	3.53253e+07	3.49831e+07	9.70307e+08	5.24297e+07	5.68593e+07	6.89308e+07	5.07449e+07	1.86226e+06	1.66766e+08	8.89213e+07	8.16927e+07	7.24191e+07	5.08014e+07	1.18697e+08	1.13472e+08	6.52449e+07	4.61368e+07	1.7731e+08	8.16453e+07	5.51463e+07	4.65611e+07	7.06297e+07	1.18787e+08	219556084	6.1435e+07	6.48821e+07
Com_5165_pos	Irganox 259	C40 H62 O6	660.433	15.381	661.441	Invalid mass	No results	No results	6.34185e+06	1.33216e+07	1.97225e+07	1.83863e+07	4.97259e+06	7.63707e+06	5.75999e+06	1.27723e+07	1.08516e+07	1.08867e+07	2.23693e+07	1.51858e+07	2.03859e+07	1.15726e+07	1.45536e+07	1.52745e+07	1.08674e+07	1.74271e+07	4.91147e+06	14949749	1.74647e+07	1.95258e+07	8.69399e+06	2.49206e+07	1.48553e+07	1.44063e+07	1.61496e+07	1.12405e+07	1.07553e+07	8.94234e+06	1.62786e+07	1.09597e+07	1.43809e+07	1.11729e+07	1.0623e+07	8.98162e+06	1.44689e+07	9.66573e+06	1.5287e+07	4.72558e+06	5.48703e+06
Com_5184_pos	PC (19:0/20:4)	C47 H86 N O8 P	823.61	14.924	824.617	No results	Full match	No results	5.48524e+06	4.48534e+06	5.78956e+06	3.92973e+06	7.20555e+06	4.1435e+06	6.72038e+06	4.86726e+06	4.53813e+06	3.98633e+06	1.02826e+07	9.52601e+06	1.50283e+07	5.55134e+06	5.80385e+06	2.68369e+06	3.64121e+06	4.12461e+06	6.34923e+06	6.33386e+06	1.24137e+07	3.85679e+06	3.241e+06	4.0596e+06	9.73586e+06	4.77304e+06	9.47126e+06	7.26913e+06	9.58481e+06	2.31513e+07	7.11881e+06	1.36654e+07	5.55241e+06	7.48696e+06	6.99471e+06	3.32682e+06	8.57876e+06	5.10293e+06	6.23079e+06	4.73466e+06	1.00461e+07
Com_51_pos	PC (19:2/19:2)	C46 H84 N O8 P	809.594	15.927	810.601	No results	Full match	No results	5990095143	5441098790	10426529168	9790154325	3157010891	2575872896	2994002080	6793646052	5513804396	17610419512	5332487822	6621793307	4595211221	6191339530	7596400283	4815973466	3627566181	4440383504	5261946812	6934403325	5185549065	6127209151	3606639602	5806604430	7444856546	6778947985	7668310060	4344599254	5406753607	4170414270	8427930095	5602407199	4209256212	4105048911	4032140464	2884683389	3225592903	6688035977	5957492441	6784386302	5161302537
Com_5205_pos	PE (16:2e/22:3)	C43 H78 N O7 P	769.56	15.355	770.566	No results	Invalid mass	No results	4.25978e+06	3.45631e+06	3.89726e+06	3.56761e+06	1.91703e+06	3.14563e+06	3.58377e+06	7.89528e+06	5.1127e+06	5.50453e+06	4.72778e+06	5.5522e+06	7.11424e+06	4.05877e+06	4.325e+06	2.58248e+06	5.02024e+06	3.55596e+06	4.69729e+06	4.44003e+06	6.91059e+06	4.57441e+06	4.62844e+06	4.7698e+06	4.2769e+06	5.95167e+06	6.97668e+06	6.46237e+06	5.18737e+06	4.40472e+06	4.87518e+06	6.23938e+06	6.84073e+06	5.49153e+06	4.8343e+06	4.41146e+06	2.70939e+06	4.79338e+06	3.54931e+06	1.99705e+07	2.8845e+06
Com_5206_pos	PC (18:0/18:0)	C44 H88 N O8 P	789.613	16.785	790.621	No results	Invalid mass	No results	1.18755e+07	1.12006e+07	1.40057e+07	9.22946e+06	7.99187e+06	1.54977e+07	1.00827e+07	1.50082e+07	1.01665e+07	1.41454e+07	1.43752e+07	1.66061e+07	1.0185e+07	9.40467e+06	1.41299e+07	8.33932e+06	1.46079e+07	1.76877e+07	1.5486e+07	1.19964e+07	1.3809e+07	1.44538e+07	8.38246e+06	1.82059e+07	1.32135e+07	1.50378e+07	1.70705e+07	1.79427e+07	1.56052e+07	1.18512e+07	1.89687e+07	1.76552e+07	1.17766e+07	1.4699e+07	8.04237e+06	8.41029e+06	8.19995e+06	1.40677e+07	1.08935e+07	1.03116e+07	1.17469e+07
Com_523_pos	D-(+)-Camphor	C10 H16 O	152.121	11.547	153.128	Full match	No results	No results	2.09818e+07	1.93733e+07	2.16668e+07	1.9417e+07	6.08208e+07	6.85176e+07	1.60325e+08	1.88368e+07	6.76543e+07	2.23747e+07	2.17127e+07	2.20918e+07	2.46212e+07	2.02212e+07	3.95854e+07	6.11616e+07	4.25609e+07	2.4458e+07	2.3253e+07	1.78686e+07	1.91082e+07	2.06795e+07	5.69633e+08	2.28941e+07	2.43358e+07	3.23799e+07	2.76091e+07	2.59432e+07	2.58924e+07	2.06578e+07	2.20101e+07	2.16533e+07	2.15186e+07	3.17247e+07	2.04021e+07	1.06411e+08	7.23054e+07	3.75629e+07	2.49835e+07	5.61498e+07	5.79219e+07
Com_5246_pos	PC (22:5e/16:3)	C46 H78 N O7 P	787.555	15.925	788.561	No results	Full match	No results	5.69178e+06	8.56822e+06	1.23136e+07	1.29485e+07	1.29901e+07	1.53016e+07	8.01687e+06	7.93546e+06	6.93488e+06	1.05765e+07	1.73603e+07	2.00129e+07	2.13998e+07	9.90327e+06	3.44642e+06	5.20288e+06	6.43874e+06	1.31863e+07	2.28531e+07	1.40862e+07	7.92203e+06	6.00569e+06	6.97688e+06	8.73478e+06	1.60083e+07	1.29911e+07	1.87722e+07	2.212e+07	1.61689e+07	1.90981e+07	1.69987e+07	1.78153e+07	1.67165e+07	1.49432e+07	2.15562e+07	1.2469e+07	9.75889e+06	1.1043e+07	1.83232e+07	9.88963e+06	1.3176e+07
Com_5279_pos	PC (14:1e/22:0)	C44 H88 N O7 P	773.626	15.816	774.634	No results	Full match	No results	1.15653e+07	1.2507e+07	1.04937e+07	1.14543e+07	9.56491e+06	9.58987e+06	6.66017e+06	8.48159e+06	9.12182e+06	1.13631e+07	1.35577e+07	1.17518e+07	2.55381e+07	1.33625e+07	1.09802e+07	8.52294e+06	1.11281e+07	1.52672e+07	9.62429e+06	8.92395e+06	1.10118e+07	1.37776e+07	7.07478e+06	1.3402e+07	1.44609e+07	9.00649e+06	1.55463e+07	1.54139e+07	1.65166e+07	1.07524e+07	8.32876e+06	1.06895e+07	1.6319e+07	1.54116e+07	1.50409e+07	6.03377e+06	9.98511e+06	1.0814e+07	2.0187e+07	1.25812e+07	1.34818e+07
Com_5280_pos	4-(2,3-dihydro-1,4-benzodioxin-6-yl)-1,2-diphenylbut-2-ene-1,4-dione	C24 H18 O4	370.125	9.652	371.132	Invalid mass	No results	No results	595134	744907	632812	558034	6.72878e+06	5.59741e+06	8.91705e+06	519752	5.23625e+06	627750	1.06854e+06	655951	647318	512033	3.32402e+06	6.35281e+06	3.07266e+06	564075	594467	540184	654303	511849	1.35287e+07	845767	1.96162e+06	2.54433e+06	749266	882827	852447	637285	717187	677643	714052	1.24974e+06	716265	9.34766e+06	6.99032e+06	2.68985e+06	1.18119e+06	4.64276e+06	6.87161e+06
Com_528_pos	Lysopc 20:4	C28 H50 N O7 P	543.331	15.092	544.339	No results	No results	Full match	303128168	537606897	3.21823e+08	5.18318e+08	2.48468e+08	2.13473e+08	1.83877e+08	3.37731e+08	3.32652e+08	3.65737e+08	3.92936e+08	5.6294e+08	4.13554e+08	3.77018e+08	3.43271e+08	491047626	3.43397e+08	4.12202e+08	3.66979e+08	4.98113e+08	5.66503e+08	8.4791e+08	4.93171e+07	3.70582e+08	9.64833e+08	5.28583e+08	2.55054e+08	2.50102e+08	240162363	4.06191e+08	2.0686e+08	3.0241e+08	224365308	2.21694e+08	2.50515e+08	2.16918e+08	3.27463e+08	1.99495e+08	2.03217e+08	2.79132e+08	2.20858e+08
Com_5292_pos	PC (14:1e/3:0)	C25 H50 N O7 P	507.33	14.564	508.337	No results	Full match	No results	5.11885e+06	1.05123e+07	5.40848e+06	1.28169e+07	9.66596e+06	6.11178e+06	6.68341e+06	9.21981e+06	1.06104e+07	6.03158e+06	1.08148e+07	9.86037e+06	7.26805e+06	5.58624e+06	3.5169e+06	1.33508e+07	9.30184e+06	7.98622e+06	6.09198e+06	1.60867e+07	1.62258e+07	1.08851e+07	1.5088e+06	6.98585e+06	6.69895e+06	7.35856e+06	1.47062e+07	9.77089e+06	1.16321e+07	1.41895e+07	9.2002e+06	9.38011e+06	1.22925e+07	6.20487e+06	7.3975e+06	1.03185e+07	1.13982e+07	5.70386e+06	5.56728e+06	4.58065e+06	9.39856e+06
Com_534_pos	P-Coumaroyl Agmatine	C14 H20 N4 O2	276.158	9.527	277.165	No results	No results	Full match	3.89485e+06	4.46349e+06	3.42676e+06	4.53831e+06	591815199	6.16948e+08	2.64653e+08	2.04526e+06	2.67961e+08	3.47061e+06	3.95621e+06	2.65484e+06	2.76613e+06	2.18327e+06	1.23202e+07	5.59997e+08	235621878	3.93473e+06	2.7353e+06	2.20448e+06	2.25717e+06	2.05818e+06	6.54079e+07	2.59685e+06	2.39149e+08	1.33246e+07	4.81768e+06	5.17934e+06	5.30829e+06	4.23583e+06	5.44318e+06	4.81774e+06	5.17236e+06	4.80713e+07	2.81131e+06	2.72928e+08	6.24096e+08	2.0601e+08	6.37847e+07	4.56637e+08	6.96719e+08
Com_5354_pos	4-Oxoretinol	C20 H28 O2	300.209	14.132	301.216	No results	No results	Full match	8.42138e+06	6.15542e+06	6.68175e+06	6.76252e+06	5.00896e+06	4.52812e+06	5.7425e+06	6.04331e+06	5.47268e+06	6.53196e+06	7.49143e+06	6.82732e+06	7.62872e+06	7.08492e+06	7.53982e+06	4.89597e+06	6.08562e+06	7.23862e+06	6.46715e+06	6.82968e+06	5.67317e+06	6.75011e+06	1.31586e+07	7.85743e+06	6.36911e+06	6.97505e+06	7.05959e+06	7.67081e+06	9.83711e+06	6.10308e+06	7.91894e+06	7.90858e+06	7.51579e+06	7.4837e+06	8.05174e+06	5.45078e+06	5.37788e+06	8.21744e+06	7.58096e+06	6.30019e+06	6.89628e+06
Com_539_pos	PC (17:0/18:2)	C43 H82 N O8 P	771.579	15.447	772.586	No results	Full match	No results	3.04006e+08	347598935	3.86858e+08	2.50385e+08	1.8951e+08	4.26977e+08	3.58832e+08	599867982	3.4266e+08	6.87893e+08	4.33675e+08	4.32866e+08	4.43456e+08	5.70619e+08	4.11701e+08	1.39977e+08	331966035	3.53513e+08	4.09393e+08	4.32611e+08	3.69563e+08	3.93075e+08	2.92143e+08	5.72957e+08	4.19222e+08	3.63066e+08	5.46819e+08	5.58424e+08	5.00775e+08	4.59937e+08	9.78603e+08	6.14242e+08	6.42434e+08	3.0453e+08	7.50499e+08	361001908	1.94639e+08	4.99143e+08	2.95359e+08	3.11338e+08	2.06234e+08
Com_5427_pos	Guanidinoacetic acid	C3 H7 N3 O2	117.054	1.225	118.061	No results	Full match	Full match	1.82369e+07	1.00006e+07	1.51836e+07	1.27189e+07	8.18687e+06	7.13584e+06	5.46897e+06	1.29886e+07	9.85845e+06	1.8157e+07	1.49323e+07	1.31238e+07	1.76772e+07	2.05541e+07	1.11472e+07	1.32225e+07	1.52798e+07	1.0458e+07	1.8262e+07	1.17968e+07	1.42024e+07	1.77965e+07	1.04813e+07	2.06552e+07	1.55259e+07	1.92367e+07	1.3189e+07	1.554e+07	1.97972e+07	1.99079e+07	1.27122e+07	1.44172e+07	1.2419e+07	1.18876e+07	1.28053e+07	9.11366e+06	1.21524e+07	1.35883e+07	1.54949e+07	1.20918e+07	1.66257e+07
Com_5445_pos	C-8 Ceramide-1-phosphate	C26 H52 N O6 P	505.355	16.888	506.362	Full match	No results	No results	1.09759e+07	1.21023e+07	1.29891e+07	1.97751e+07	9.22421e+06	8.84323e+06	8.87637e+06	1.57491e+07	1.05544e+07	1.79343e+07	1.33713e+07	2.12446e+07	1.31747e+07	1.37062e+07	1.59758e+07	9.40954e+06	1.79189e+07	1.54732e+07	1.48034e+07	1.91994e+07	1.91791e+07	1.45875e+07	1.19167e+07	2.24179e+07	1.41555e+07	1.25054e+07	1.97638e+07	1.77704e+07	1.51403e+07	1.05688e+07	1.68513e+07	1.42847e+07	1.73947e+07	1.85774e+07	1.26629e+07	1.02009e+07	5.96325e+06	1.56862e+07	1.27986e+07	1.38355e+07	1.53958e+07
Com_5463_pos	1-Methylhistidine	C7 H11 N3 O2	169.086	9.851	170.093	No results	No results	Full match	3.45292e+06	4.7519e+06	4.8795e+06	4.16122e+06	2.93149e+06	3.40715e+06	3.20432e+06	4.5998e+06	3.47191e+06	4.63754e+06	5.06949e+06	4.96983e+06	5.44884e+06	4.25302e+06	4.30295e+06	3.27429e+06	3.92672e+06	4.46245e+06	5.72141e+06	4.65866e+06	4.60419e+06	4.70644e+06	2.68612e+06	5.68039e+06	3.99483e+06	4.47826e+06	4.00009e+06	4.15205e+06	4.29036e+06	1.06504e+07	4.17026e+06	4.05053e+06	4.10886e+06	4.23014e+06	4.70096e+06	3.20327e+06	3.22794e+06	4.58733e+06	4.26777e+06	3.4306e+06	3.28363e+06
Com_54_pos	(2R)-2-[(2R,5S)-5-[(2S)-2-hydroxybutyl]oxolan-2-yl]propanoic acid	C11 H20 O4	216.137	10.492	217.144	Full match	No results	Full match	2.14846e+07	2.22105e+07	2.69886e+07	2.13696e+07	1591163140	1565849170	2873010447	1.81314e+07	1312899994	2.57526e+07	2.21744e+07	2.76521e+07	2.47708e+07	1.83432e+07	785013654	1152966092	7.62748e+08	3.12261e+07	2.43684e+07	1.72477e+07	2.45421e+07	2.07803e+07	9829856810	3.69255e+07	1.22795e+08	6.23152e+08	2.02667e+07	2.24987e+07	2.48258e+07	2.10374e+07	1.77338e+07	2.5976e+07	2.10988e+07	3.21485e+08	2.54583e+07	2768786651	1772797705	842574091	210607013	1293780842	1671451076
Com_5511_pos	O-Arachidonoyl ethanolamine	C22 H37 N O2	330.254	14.014	331.263	Invalid mass	No results	No match	1.10006e+06	829347	876335	851528	350950	424500	541851	967946	385133	1.06318e+06	899988	818516	1.02225e+06	604816	881577	505910	700161	757372	687044	586019	819952	644676	398412	1.09002e+06	1.05803e+06	666074	949344	829171	905427	724196	755559	850432	1.18613e+06	1.05716e+06	1.12248e+06	483565	481290	786861	942133	818126	848854
Com_5518_pos	Capryloylglycine	C10 H19 N O3	201.137	1.555	202.144	Full match	No results	No results	1.88569e+06	1.61571e+06	3.91527e+06	2.76269e+06	1.23828e+06	3.40504e+06	1.1789e+06	2.89157e+06	2.529e+06	2.27991e+06	2.11883e+06	8.20481e+06	1.94358e+07	2.80276e+06	1.35268e+06	2.75926e+06	5.52984e+06	3.21983e+06	1.85365e+06	1.86959e+07	4.1787e+06	2.24763e+06	2.77355e+06	3.58715e+06	7.35783e+06	1.71135e+06	3.31441e+06	1.18029e+07	2.62473e+06	2.40872e+06	2.61587e+06	6.83891e+06	2.60458e+06	2.14244e+06	2.53013e+06	1.3225e+06	1.79249e+06	3.10727e+06	1.56975e+06	1.59373e+06	3.57213e+06
Com_552_pos	L-(-)-Methionine	C5 H11 N O2 S	149.051	1.905	150.059	Full match	Full match	Full match	1.96375e+08	1.15894e+08	8.18566e+07	1.5108e+08	1.1263e+08	7.80096e+07	1.1808e+08	184448394	172940962	145769059	178931169	1.2933e+08	2.42268e+08	2.02925e+08	1.36785e+08	1.37292e+08	1.43958e+08	1.82102e+08	1.98979e+08	1.66565e+08	1.53263e+08	1.4472e+08	5.30281e+08	2.37959e+08	1.18371e+08	124318724	6.04849e+07	1.09705e+08	9.79418e+07	1.2311e+08	1.05969e+08	1.28047e+08	7.0067e+07	8.30626e+07	1.15266e+08	6.68911e+07	8.49104e+07	1.21886e+08	1.3492e+08	1.11355e+08	1.73889e+08
Com_555_pos	PC (18:0/20:5)	C46 H82 N O8 P	807.578	16.671	808.586	No results	Full match	No results	8.11787e+07	7.2931e+07	1.20605e+08	9.0051e+07	6.96749e+07	5.66356e+07	5.85841e+07	6.6864e+07	7.33318e+07	7.99346e+07	8.86861e+07	1.16634e+08	1.35091e+08	7.94247e+07	7.19722e+07	3.78752e+07	8.31047e+07	9.58528e+07	1.01422e+08	8.27672e+07	6.84298e+07	6.05253e+07	4.44607e+07	9.16946e+07	8.61495e+07	8.49378e+07	1.15734e+08	120132496	7.74254e+07	6.91378e+07	9.35712e+07	1.13629e+08	1.48875e+08	1.11631e+08	1.06204e+08	7.05737e+07	5.09335e+07	9.93039e+07	9.24029e+08	6.90667e+07	1.02647e+08
Com_556_pos	2-Amino-1,3,4-octadecanetriol	C18 H39 N O3	317.294	12.036	318.301	Full match	Full match	No results	1.34002e+08	8.44456e+07	4.49711e+07	4.48112e+07	3.15799e+07	3.14524e+07	3.45569e+07	3.92291e+07	3.71801e+07	4.72291e+07	4.81018e+07	9.31787e+07	1.15023e+08	4.19612e+07	1.41766e+08	3.23164e+07	3.64719e+07	4.39937e+07	5.23993e+07	4.47727e+07	4.1564e+07	4.64789e+07	2.61636e+07	1.49401e+08	1.22444e+08	1.66502e+08	1.60926e+08	1.50779e+08	216832355	1.36981e+08	1.78361e+08	1.02041e+08	1.75112e+08	1.76101e+08	8.40268e+07	5.52142e+07	5.4546e+07	1.90087e+08	1.35498e+08	5.20016e+07	5.04496e+07
Com_5619_pos	N-Acetylneuraminic acid	C11 H19 N O9	309.107	1.346	310.114	Full match	Full match	Full match	4.47601e+06	4.24647e+06	4.03707e+06	6.42879e+06	3.61794e+06	2.73278e+06	3.19224e+06	2.96201e+06	5.23018e+06	4.07831e+06	4.50829e+06	2.92471e+06	3.01076e+06	3.97894e+06	2.86708e+06	2.70835e+06	2.4283e+06	5.23885e+06	4.89466e+06	4.17873e+06	3.70064e+06	3.67285e+06	8.2592e+06	3.4354e+06	3.5244e+06	2.6115e+06	4.92018e+06	3.82159e+06	3.84499e+06	5.63833e+06	3.03388e+06	6.25581e+06	2.59002e+06	3.24148e+06	5.61481e+06	3.24455e+06	2.52391e+06	2.93564e+06	2.31841e+06	7.03766e+06	3.28885e+06
Com_5638_pos	Hesperetin	C16 H14 O6	302.079	9.867	303.087	Full match	No results	No results	1.96513e+06	1.49868e+06	1.55296e+06	3.71543e+06	1.43465e+06	1.76662e+06	1.75233e+06	1.74536e+06	1.42519e+06	1.50259e+06	1.62185e+06	7.27609e+06	1.63973e+06	2.17148e+06	1.34975e+06	1.2946e+06	1.68547e+06	2.16729e+06	7.17439e+06	2.76028e+06	2.28211e+06	1.6632e+06	1.42544e+06	1.78613e+06	1.67528e+06	1.41763e+06	2.52164e+06	2.55933e+06	4.68351e+06	2.43676e+06	2.79513e+06	2.31327e+06	2.24396e+06	3.57283e+06	1.69998e+06	1.48318e+06	1.5179e+06	1.77394e+06	2.21355e+06	1.49508e+06	2.1505e+06
Com_566_pos	4-oxododecanedioic acid	C12 H20 O5	266.114	10.485	267.121	Invalid mass	No results	No results	1.78926e+07	1.2756e+07	1.49648e+07	1.46261e+07	1.68601e+08	1.72016e+08	1.77081e+08	1.47318e+07	1.04013e+08	1.64667e+07	1.49693e+07	1.3612e+07	1.50328e+07	1.45423e+07	3.71239e+07	1.23653e+08	1.06279e+08	1.80451e+07	1.59889e+07	1.35485e+07	2.08324e+07	1.39126e+07	4.99497e+08	1.25606e+07	6.88021e+07	3.28338e+07	1.15143e+07	1.57473e+07	1.20759e+07	1.25875e+07	1.07034e+07	1.16133e+07	1.17874e+07	2.58734e+07	1.1929e+07	8.64401e+07	1.75399e+08	6.74081e+07	3.2332e+07	1.20503e+08	1.48658e+08
Com_571_pos	SM (d16:1/16:0)	C37 H75 N2 O6 P	674.538	15.159	675.545	No results	Full match	No results	4.71492e+08	3.91778e+08	3.82489e+08	3.46341e+08	3.59872e+08	4.10073e+08	4.18715e+08	2.75498e+08	2.89551e+08	5.67489e+08	3.83007e+08	3.23751e+08	7.1538e+08	3.62845e+08	2.66098e+08	2.08026e+08	261116650	3.82993e+08	3.10875e+08	1.93505e+08	3.35154e+08	3.98794e+08	4.04341e+08	4.62459e+08	5.07213e+08	2.91009e+08	7.29059e+08	3.13109e+08	3.95405e+08	818996453	3.00815e+08	6.14834e+08	3.87954e+08	2.9001e+08	5.34934e+08	1.21398e+08	3.18504e+08	3.279e+08	5.35861e+08	2.1086e+08	2.73886e+08
Com_5731_pos	Proline-hydroxyproline	C10 H16 N2 O4	228.112	1.511	229.119	No results	Full match	No results	1.45714e+07	1.05917e+07	1.01229e+07	1.24699e+07	9.42315e+06	9.62647e+06	9.79031e+06	1.31313e+07	7.89504e+06	1.29085e+07	9.15649e+06	1.32228e+07	2.18874e+07	1.0362e+07	9.2016e+06	8.67845e+06	1.10919e+07	8.66954e+06	1.20578e+07	1.29771e+07	9.21532e+06	8.35267e+06	2.34327e+06	1.34779e+07	1.16741e+07	7.9507e+06	1.19641e+07	1.34178e+07	1.69155e+07	8.80014e+06	1.25883e+07	8.40889e+06	1.04353e+07	1.25534e+07	1.01572e+07	7.02295e+06	7.6634e+06	1.18089e+07	1.15439e+07	8.84595e+06	1.2669e+07
Com_5737_pos	6-(3-hydroxybutan-2-yl)-5-(hydroxymethyl)-4-methoxy-2H-pyran-2-one	C11 H16 O5	266.052	1.514	267.059	Invalid mass	No results	No results	1.86203e+07	1.72691e+07	1.10673e+07	1.3099e+07	9.50205e+06	1.05351e+07	7.80816e+06	1.25612e+07	1.11772e+07	1.34662e+07	1.17419e+07	1.34503e+07	1.88649e+07	1.45458e+07	1.76285e+07	8.4659e+06	1.22542e+07	1.18377e+07	1.48956e+07	1.22132e+07	1.12607e+07	1.44831e+07	9.96369e+06	1.34047e+07	1.76827e+07	1.47333e+07	1.46523e+07	1.21967e+07	1.63075e+07	1.20145e+07	1.23204e+07	1.31318e+07	1.01961e+07	1.64443e+07	9.06263e+06	9.01183e+06	8.70433e+06	1.33074e+07	1.2291e+07	8.08165e+06	1.22985e+07
Com_575_pos	N-Tetradecanamide	C14 H29 N O	227.225	14.25	228.233	No results	No results	Full match	1.0658e+08	1.04311e+08	1.10968e+08	1.18148e+08	6.22768e+07	6.39374e+07	6.84886e+07	8.5726e+07	6.82927e+07	1.28391e+08	1.015e+08	1.00553e+08	1.28322e+08	1.09962e+08	8.8409e+07	6.05e+07	8.6873e+07	1.16455e+08	1.04425e+08	9.45172e+07	1.14055e+08	1.04599e+08	5.75226e+07	1.15027e+08	1.00578e+08	9.15635e+07	112240491	1.1719e+08	1.05599e+08	113142525	8.76772e+07	1.0955e+08	1.27165e+08	1.13852e+08	1.11703e+08	5.62918e+07	5.85094e+07	8.82563e+07	1.04214e+08	7.99338e+07	7.45712e+07
Com_5787_pos	PC (18:5e/16:3)	C42 H70 N O7 P	731.483	14.164	732.491	No results	Invalid mass	No results	1.26231e+06	1.2745e+06	1.39271e+06	1.37685e+06	9.31398e+06	7.66246e+06	1.00533e+07	1.3733e+06	6.14739e+06	1.4188e+06	1.39843e+06	1.37288e+06	1.37083e+06	1.26741e+06	1.19062e+06	8.03893e+06	1.3805e+06	1.34376e+06	1.35861e+06	1.23282e+06	1.25154e+06	1.28916e+06	1.10515e+07	1.61039e+06	1.33853e+06	1.14952e+06	1.90768e+06	3.7862e+06	2.05166e+06	4.30714e+06	1.74152e+06	1.7863e+06	1.77727e+06	1.70606e+06	1.65625e+06	1.32607e+07	927404	1.43392e+06	1.52506e+06	9.83454e+06	7.08498e+06
Com_5798_pos	ACar 14:0	C21 H42 N O4	371.305	12.922	372.312	No results	Invalid mass	No results	1.37295e+07	5.46457e+06	4.84982e+06	3.3849e+06	2.87968e+06	1.89907e+06	2.4297e+06	7.2338e+06	4.33044e+06	5.27288e+06	5.14069e+06	1.14982e+07	8.73331e+06	5.87068e+06	1.45594e+06	3.39631e+06	3.05459e+06	1.90011e+07	4.15923e+06	5.47183e+06	3.90628e+06	4.11304e+06	629813	1.1402e+07	4.72218e+06	7.07152e+06	2.75368e+06	2.12612e+06	2.29901e+06	3.82433e+06	4.56422e+06	2.86195e+06	4.91399e+06	3.08766e+06	2.40393e+06	2.55939e+06	4.32496e+06	7.29596e+06	4.6587e+06	2.97362e+06	2.42809e+06
Com_57_pos	PC (18:1/20:5)	C46 H80 N O8 P	805.563	16.288	806.57	No results	Full match	No results	10044305374	14249180121	6886833298	6770432539	3425849951	7142012788	7364469545	7755059724	5804159155	8585655061	8013582233	9037868467	4898929142	6546633930	6246893571	3440492633	4850459046	7895573328	10197932032	5019886710	8413630336	5693336723	3635532479	7248975297	6633211927	5982450973	6593626899	8782373098	8395879281	9827472858	5715580175	8963232699	6301292055	8129793099	12162423507	5410265632	2992272567	5563878352	13085695051	5354017454	3617042563
Com_5858_pos	PC (19:0/19:1)	C46 H90 N O8 P	815.626	15.02	816.633	No results	Invalid mass	No results	9.74863e+06	2.091e+06	8.39471e+06	7.13086e+06	4.82083e+06	6.95203e+06	5.04288e+06	7.40428e+06	6.73351e+06	7.57366e+06	1.27756e+07	1.1898e+07	1.26749e+07	9.03294e+06	8.46747e+06	3.00482e+06	8.44444e+06	5.32382e+06	1.23559e+07	1.04673e+07	5.88935e+06	5.75467e+06	4.19127e+06	4.7678e+06	1.07301e+07	7.32343e+06	1.33619e+07	1.52501e+07	1.34433e+07	1.25389e+07	8.34945e+06	1.58404e+07	1.37987e+07	1.30578e+07	1.29184e+07	4.8e+06	6.9281e+06	6.51157e+06	1.65685e+07	6.22231e+06	1.53968e+07
Com_58_pos	PC (22:6e/15:1)	C45 H78 N O7 P	775.551	14.385	776.558	No results	Full match	No results	7534970609	7440308958	9979473208	9695309020	6450044092	7272852868	10574512541	10720742386	5311403548	7393747740	10863044808	12480761814	8471187900	10682216183	9228692480	4695357463	8600888391	8929568697	11511908052	9156789904	10596386998	7816166085	4741539987	7626550280	7060605527	11332878363	10141506333	10885283691	9097529641	6901865456	10696741403	9787460947	13197119918	11669307364	10743733153	9261936606	4712121172	8329067494	6834230786	9244828951	7984474552
Com_5920_pos	3-(4-hydroxy-3-methoxyphenyl)propanoic acid	C10 H12 O4	218.056	8.989	219.063	Invalid mass	No results	No results	1.32784e+06	1.63448e+06	1.86131e+06	1.70516e+07	1.03633e+06	3.03111e+06	1.35538e+07	1.31922e+06	980502	1.51394e+06	1.52471e+06	1.37152e+06	2.00498e+06	1.37482e+06	1.46651e+06	845520	1.67509e+06	5.95953e+06	1.78254e+07	6.22059e+06	5.13021e+06	1.08468e+06	1.08779e+06	1.59124e+06	1.32567e+06	1.25439e+06	1.28738e+06	1.23667e+06	2.12845e+06	1.25657e+06	2.8481e+06	1.40291e+06	1.70635e+06	1.39358e+06	1.19873e+06	1.23458e+06	1.17264e+06	1.42487e+06	1.54587e+06	2.12575e+06	1.92574e+06
Com_5973_pos	PC (18:1/18:1)	C44 H84 N O8 P	1571.19	13.004	786.604	No results	Invalid mass	No results	7.60521e+06	6.99924e+06	8.17829e+06	8.40034e+06	8.30508e+06	5.48491e+06	7.761e+06	8.9487e+06	1.064e+07	9.82137e+06	1.17886e+07	8.16655e+06	1.21294e+07	6.0938e+06	1.16709e+07	9.16041e+06	1.01586e+07	1.42729e+07	1.12548e+07	9.19615e+06	6.22248e+06	1.44863e+07	7.56546e+06	1.75934e+07	1.53822e+07	8.86876e+06	1.43898e+07	1.43825e+07	1.42222e+07	8.0272e+06	8.37336e+06	1.15366e+07	1.27671e+07	1.47786e+07	1.55099e+07	9.4807e+06	3.90667e+06	5.81527e+06	9.00478e+06	5.54141e+06	7.95593e+06
Com_598_pos	methyl 4-methyl-2-oxo-2H-pyran-6-carboxylate	C8 H8 O4	168.043	9.834	169.05	Full match	No results	Full match	1.35989e+08	1.16299e+08	2.65885e+08	3.38641e+08	9.9856e+07	1.04261e+08	8.43319e+07	1.81414e+08	4.2526e+07	1.69955e+08	2.28826e+07	1.1784e+08	5.05092e+07	3.85488e+07	3.29872e+07	3.24214e+08	3.99967e+08	2.95342e+07	8.07674e+08	7.76969e+07	2.65058e+08	3.55826e+07	1.35666e+08	3.42754e+07	1.7383e+08	1.82705e+08	6.49266e+07	1.91773e+08	3.7771e+08	8.3848e+07	6.77197e+07	3.43316e+07	1.18007e+08	4.87642e+07	3.31801e+07	6.41716e+07	9.50766e+06	1.1212e+08	4.37757e+07	6.92299e+07	2.23516e+08
Com_5999_pos	N6-Acetyl-L-Lysine	C8 H16 N2 O3	188.116	1.595	189.124	No results	No results	Full match	9.51027e+06	7.93037e+06	6.9085e+06	8.68716e+06	6.09982e+06	6.96517e+06	6.6639e+06	5.87771e+06	7.77707e+06	8.37592e+06	7.70368e+06	8.73576e+06	8.90973e+06	8.57439e+06	7.76183e+06	5.45775e+06	6.41574e+06	7.31739e+06	7.84713e+06	6.0293e+06	6.52843e+06	7.3968e+06	1.07051e+07	8.20912e+06	8.94195e+06	7.4327e+06	1.37549e+07	8.36841e+06	1.19208e+07	5.67375e+06	7.33729e+06	8.74733e+06	7.96079e+06	1.04181e+07	7.57354e+06	5.0498e+06	4.6968e+06	7.02852e+06	6.95402e+06	5.6199e+06	6.1679e+06
Com_6003_pos	3-Methoxybenzaldehyde	C8 H8 O2	136.05	1.148	137.058	Invalid mass	No results	No results	1.06259e+07	1.38301e+07	1.32282e+07	8.63161e+06	7.87004e+06	1.06085e+07	9.26662e+06	1.32747e+07	6.66399e+06	1.33126e+07	1.29465e+07	1.30566e+07	13117450	1.09355e+07	1.42352e+07	9.222e+06	9.81257e+06	1.22919e+07	1.26515e+07	1.40443e+07	1.12025e+07	9.28475e+06	3.23171e+06	9.5698e+06	1.33784e+07	1.14676e+07	1.86569e+07	1.36873e+07	1.8287e+07	1.63462e+07	1.47094e+07	1.31673e+07	1.89578e+07	1.69888e+07	1.86266e+07	1.04693e+07	1.18784e+07	1.8441e+07	1.84597e+07	1.0182e+07	1.25285e+07
Com_6030_pos	Maltotriose	C18 H32 O16	504.167	15.394	505.175	No results	No results	Full match	1.40957e+07	1.1888e+07	1.30351e+07	8.18977e+06	8.41399e+06	6.81388e+06	7.54861e+06	1.20482e+07	9.16421e+06	1.33376e+07	8.26837e+06	1.04337e+07	1.23304e+07	1.21247e+07	1.30725e+07	4.69145e+06	9.8246e+06	1.20118e+07	1.21426e+07	1.1011e+07	9.31996e+06	1.35553e+07	1.05715e+07	1.16979e+07	1.17863e+07	8.98041e+06	8.3771e+06	1.06309e+07	7.98379e+06	9.59675e+06	8.34456e+06	1.40631e+07	1.00661e+07	1.0357e+07	1.11801e+07	7.39401e+06	8.86446e+06	1.81565e+07	1.59778e+07	7.28373e+06	1.32353e+07
Com_605_pos	Theophylline	C7 H8 N4 O2	180.065	6.784	181.072	Full match	Full match	No results	5.196e+06	1.64204e+07	4.42908e+07	4.3727e+06	4.11763e+06	3.19492e+06	5.47005e+06	3.80182e+06	3.75603e+06	4.12797e+06	9.34834e+06	4.62976e+06	2.93327e+07	4.56175e+06	3.44471e+06	4.47797e+07	3.32222e+06	3.58672e+06	5.74975e+06	8.30624e+06	3.8093e+06	1.64236e+07	6.46554e+06	7.79534e+07	4.20484e+07	6.82208e+08	3.41417e+06	5.63786e+06	1.75388e+08	5.62583e+06	5.27502e+06	4.3983e+06	1.75918e+07	6.29027e+06	4.41053e+06	3.91027e+07	3.57702e+06	4.959e+06	4.28524e+06	3.54366e+06	5.63077e+06
Com_613_pos	PC (16:0e/20:5)	C44 H80 N O7 P	765.568	14.926	766.576	No results	Full match	No results	4.58123e+08	4.99904e+08	5.17055e+08	280121151	2.71377e+08	319642473	3.20664e+08	4.38784e+08	3.35993e+08	5.07472e+08	4.99623e+08	4.15988e+08	5.37406e+08	5.76647e+08	4.15367e+08	3.41349e+08	2.64457e+08	2.74048e+08	3.24221e+08	4.44314e+08	3.14114e+08	3.83139e+08	3.56017e+08	4.17252e+08	7.41921e+08	4.01725e+08	453531451	524964571	489463416	2.17018e+08	5.57476e+08	4.8379e+08	4.11661e+08	3.83601e+08	3.23652e+08	2.8756e+08	3.07876e+08	4.85995e+08	4.8259e+08	4.21616e+08	2.4778e+08
Com_6212_pos	gamma-Glutamylleucine	C11 H20 N2 O5	260.138	7.703	261.145	No results	Full match	Full match	1.39016e+07	1.06652e+07	6.41082e+06	8.56246e+06	6.25435e+06	4.56946e+06	5.81774e+06	8.07952e+06	1.2451e+07	8.90381e+06	1.24656e+07	8.89059e+06	1.00169e+07	8.06559e+06	1.13534e+07	5.37464e+06	5.5341e+06	8.1606e+06	786965	1.012e+07	9.7931e+06	8.10141e+06	7.09384e+06	1.14204e+07	5.1632e+06	7.37095e+06	4.30025e+06	6.03513e+06	4.26518e+06	5.31535e+06	5.55419e+06	5.67915e+06	3.83577e+06	4.94903e+06	7.31517e+06	4.33409e+06	4.30473e+06	8.75229e+06	7.28999e+06	3.8233e+06	5.765e+06
Com_622_pos	4-(trifluoromethyl)nicotinic acid	C7 H4 F3 N O2	191.017	1.253	192.025	Invalid mass	No results	No results	1.67604e+08	1.28976e+08	1.54144e+08	1.43303e+08	9.23934e+07	7.36757e+07	100105668	1.24172e+08	1.63309e+08	1.28815e+08	2.04609e+08	7.55029e+07	8.16733e+07	1.4009e+08	2.67851e+08	7.2608e+07	7.77859e+07	1.9767e+08	1.59929e+08	1.45943e+08	1.53687e+08	1.74674e+08	4.24912e+08	1.26024e+08	4.1179e+07	1.64214e+08	2.14701e+08	1.28202e+08	9.57698e+07	1.77394e+08	1.00847e+08	1.55279e+08	1.13181e+08	1.36183e+08	1.61475e+08	1.10068e+08	1.44898e+08	9.9719e+07	1.04213e+08	1.02639e+08	1.27729e+08
Com_627_pos	Ornithine	C5 H12 N2 O2	132.09	1.074	133.097	Full match	Full match	Full match	1.58944e+08	1.08038e+08	1.59557e+08	1.5696e+08	8.67272e+07	5.08948e+07	8.77048e+07	1.22331e+08	1.23177e+08	116959317	1.41661e+08	1.11587e+08	1.23586e+08	1.45366e+08	9.87412e+07	5.24351e+07	5.18686e+07	1.71368e+08	1.3673e+08	1.42265e+08	1.57326e+08	1.25258e+08	421054222	1.57791e+08	4.94505e+07	1.11697e+08	1.48256e+08	1.16739e+08	9.70473e+07	1.99426e+08	7.32785e+07	1.17354e+08	1.327e+08	1.02826e+08	1.69683e+08	1.66753e+08	8.70636e+07	6.88792e+07	8.98945e+07	8.66589e+07	6.60361e+07
Com_628_pos	Diethyleneglycol diacetate	C8 H14 O5	190.085	7.53	191.092	Full match	No results	No results	2.59982e+07	2.43064e+07	2.37671e+07	2.59445e+07	3.47825e+08	3.45077e+08	3.70695e+08	2.30139e+07	2.93279e+08	2.60527e+07	3.04322e+07	2.55485e+07	2.73525e+07	2.52072e+07	9.14699e+07	3.52369e+08	1.96026e+08	2.46497e+07	2.46707e+07	2.1185e+07	2.44897e+07	2.23749e+07	2.93629e+08	2.49825e+07	1.49326e+08	8.6827e+07	2.93265e+07	2.91978e+07	3.24728e+07	2.54863e+07	2.79094e+07	2.67257e+07	2.88543e+07	7.63098e+07	2.60472e+07	3.09859e+08	3.49489e+08	1.69318e+08	7.20277e+07	2.68059e+08	3.58813e+08
Com_6404_pos	Dehydrocholic acid	C24 H34 O5	402.239	14.339	403.246	No results	No results	Full match	9.76157e+06	1.40363e+07	9.66725e+06	7.14206e+06	3.83799e+06	3.41969e+06	734060	4.51155e+06	9.62305e+06	6.89913e+06	4.49318e+06	6.20163e+06	8.7398e+06	1.21217e+07	4.5894e+06	5.90858e+06	7.61735e+06	5.09839e+06	6.46205e+06	5.71719e+06	8.4368e+06	1.24853e+07	5.52108e+06	4.59079e+06	4.475e+06	6.97247e+06	4.96328e+06	8.57132e+06	7.24598e+06	7.82905e+06	7.49869e+06	1.14653e+07	1.2789e+07	7.15416e+06	8.75112e+06	3.9517e+06	1.16424e+07	7.52909e+06	1.09269e+07	3.8667e+06	6.1218e+06
Com_6406_pos	PC (16:1e/20:2)	C44 H84 N O7 P	769.6	16.688	770.607	No results	Full match	No results	6.21114e+06	9.23533e+06	7.46796e+06	5.84992e+06	5.47089e+06	6.19499e+06	7.12915e+06	9.57606e+06	7.19467e+06	1.34887e+07	1.00638e+07	1.06092e+07	1.01831e+07	1.10107e+07	8.73262e+06	6.28191e+06	8.2031e+06	8.34932e+06	9.26728e+06	9.16887e+06	1.06546e+07	9.28879e+06	7.48979e+06	1.5034e+07	1.16049e+07	1.14876e+07	8.50115e+06	1.12103e+07	9.46598e+06	8.90717e+06	1.71268e+07	1.09503e+07	1.06397e+07	7.65256e+06	1.38059e+07	8.56645e+06	3.84374e+06	1.06257e+07	5.31162e+06	7.69783e+06	2.4731e+06
Com_6563_pos	PC (14:1/15:1)	C37 H70 N O8 P	687.492	14.993	688.499	No results	Invalid mass	No results	1.97829e+06	1.81864e+06	1.79982e+06	1.95038e+06	5.80456e+06	2.73876e+06	4.38479e+06	1.65854e+06	3.89461e+06	1.856e+06	1.98566e+06	1.86062e+06	1.80966e+06	1.72554e+06	1.53554e+06	2.19257e+06	3.62194e+06	1.97738e+06	1.71037e+06	2.21201e+06	1.87693e+06	1.80529e+06	1.15044e+06	1.76593e+06	1.68336e+06	1.54876e+06	1.87406e+06	1.89681e+06	1.81234e+06	1.73524e+06	1.63665e+06	1.82239e+06	1.85929e+06	2.41764e+06	1.67603e+06	3.03713e+06	3.85815e+06	1.60789e+06	1.72876e+06	3.38163e+06	1.326e+06
Com_6661_pos	allantoate	C4 H8 N4 O4	176.054	1.872	177.061	No results	No results	Full match	988864	1.25713e+06	1.15361e+06	1.28304e+06	4.2441e+06	4.44262e+06	5.73754e+06	1.38076e+06	3.28584e+06	1.17498e+06	868319	1.04879e+06	1.33667e+06	930242	2.12038e+06	5.18956e+06	3.26234e+06	1.70239e+06	944112	1.13339e+06	1.0785e+06	892004	8.84176e+06	1.19992e+06	3.27945e+06	1.78098e+06	1.93862e+06	1.50988e+06	1.96074e+06	2.9178e+06	1.55931e+06	1.10249e+06	1.54087e+06	2.05484e+06	1.57164e+06	5.12157e+06	4.374e+06	4.06501e+06	1.49921e+06	3.07886e+06	6.02824e+06
Com_6686_pos	PC (16:0e/20:3)	C44 H84 N O7 P	769.6	14.189	770.607	No results	Full match	No results	8.00945e+06	7.48731e+06	7.82424e+06	6.1194e+06	6.2202e+06	5.00766e+06	8.75108e+06	7.97395e+06	8.81743e+06	1.16767e+07	8.34765e+06	9.02983e+06	1.12817e+07	7.35126e+06	7.96154e+06	6.00198e+06	5.43413e+06	9.46889e+06	8.33545e+06	7.02381e+06	6.56817e+06	9.55341e+06	6.89265e+06	1.04582e+07	1.11825e+07	8.77234e+06	1.39391e+07	1.08668e+07	1.17623e+07	5.86099e+06	6.70152e+06	1.51539e+07	1.10927e+07	1.00045e+07	7.69682e+06	1.02047e+07	5.53884e+06	6.0756e+06	1.12616e+07	3.02914e+06	8.03043e+06
Com_6713_pos	Citrinin	C13 H14 O5	106.064	9.874	251.092	Invalid mass	No results	No results	2.13759e+06	2.34315e+06	2.24946e+06	1.8881e+06	1.83548e+06	1.53275e+06	2.13069e+06	2.2615e+06	1.85111e+06	2.38756e+06	2.06817e+06	2.13383e+06	2.75833e+06	2.21428e+06	1.9348e+06	5.26826e+06	2.13745e+06	2.05257e+06	2.25794e+06	2.26735e+06	1.76372e+06	2.12114e+06	1.59416e+06	2.49858e+06	2.71638e+06	2.47614e+06	1.55308e+07	2.557e+06	3.26007e+06	2.46173e+06	2.59212e+06	2.84986e+06	3.02164e+06	2.92268e+06	2.60488e+06	1.85597e+06	1.79687e+06	2.78278e+06	2.81017e+06	2.14338e+06	2.19047e+06
Com_6778_pos	2-{2-[4-(tert-butyl)phenyl]-4-hydroxy-1,3-thiazol-5-yl}acetic acid	C15 H17 N O3 S	291.096	1.372	292.103	Invalid mass	No results	No results	4.31969e+06	4.16759e+06	3.03282e+06	4.91289e+06	3.123e+06	2.94623e+06	3.00651e+06	2.69543e+06	4.67082e+06	4.58839e+06	4.34008e+06	4.81981e+06	3.97516e+06	4.12866e+06	3.68684e+06	2.55632e+06	2.96991e+06	5.15434e+06	4.1663e+06	4.83713e+06	3.74424e+06	3.54002e+06	8.14189e+06	3.83461e+06	3.58848e+06	3.75967e+06	4.47713e+06	3.19359e+06	4.24902e+06	4.63086e+06	3.10893e+06	5.82804e+06	3.1023e+06	3.61334e+06	4.71449e+06	2.9982e+06	2.01675e+06	3.79901e+06	3.50422e+06	3.9184e+06	3.36681e+06
Com_677_pos	N-Methyloctan-1-amine	C9 H21 N	143.168	6.354	144.175	Full match	No results	No results	2.95095e+08	151375881	1.36711e+08	4.91952e+07	4.25034e+07	4.55482e+07	4.14799e+07	5.04653e+07	2.96675e+07	5.50406e+07	1.18868e+08	1.87084e+06	1.86511e+06	9.27811e+07	1.83212e+06	1.69868e+07	3.16426e+07	4.98914e+07	3.84936e+07	3.96675e+07	6.78413e+07	7.45796e+07	1.05606e+08	2.19668e+06	2.32617e+06	4.16138e+06	4.82926e+07	7.30624e+07	2.26845e+06	1.05685e+08	2.20358e+06	3.1775e+07	1.51946e+06	1.73755e+06	4.09978e+07	4.64565e+07	2.98447e+07	1.16487e+06	2.24422e+06	3.57988e+07	4.0604e+07
Com_6788_pos	5-{[(2-aminophenyl)thio]methyl}-4-(hydroxymethyl)-2-methylpyridin-3-ol	C14 H16 N2 O2 S	276.089	9.201	277.096	Invalid mass	No results	No results	390971	366393	367891	358696	1.50066e+06	1.6858e+06	2.68223e+06	426288	1.23191e+06	394836	549892	522798	399374	360931	1.35594e+06	1.36081e+06	1.5254e+06	549171	394220	317306	450692	339873	8.51089e+06	507168	468530	834595	572020	496551	566392	418294	489133	491603	448412	564311	438548	3.08503e+06	1.85303e+06	1.16837e+06	416967	1.45793e+06	1.7891e+06
Com_678_pos	3-(3,4,5-trimethoxyphenyl)propanoic acid	C12 H16 O5	262.082	11.93	263.09	Invalid mass	No results	No results	8.07217e+07	7.31499e+07	9.94772e+07	9.39917e+07	1.62388e+08	6.38335e+07	2.28891e+08	1.28613e+08	2.74757e+08	2.7454e+08	4.64435e+08	6.63256e+08	1.27259e+08	169203167	6.26279e+07	7.2869e+07	4.68249e+07	8.64226e+07	4.68056e+07	1.49491e+08	7.31464e+07	8.28861e+07	7.59257e+07	3.63764e+07	1.86905e+08	5.46116e+07	4.00456e+08	4.20426e+08	4.45041e+08	1.80866e+08	1.60731e+08	1.3064e+08	1.86523e+08	6.59301e+08	2.48546e+08	3.04936e+08	2.86433e+07	1.90094e+08	3.81872e+08	1.75475e+08	3.65497e+07
Com_6803_pos	5-[(10Z)-14-(3,5-dihydroxyphenyl)tetradec-10-en-1-yl]benzene-1,3-diol	C26 H36 O4	434.25	9.848	435.258	Invalid mass	No results	No results	1.33583e+07	1.15509e+07	7.00066e+06	1.30766e+07	5.48891e+06	7.46768e+06	7.09805e+06	7.49734e+06	6.13144e+06	8.15473e+06	6.7719e+06	6.96381e+06	6.89187e+06	8.29965e+06	8.29861e+06	5.64018e+06	6.19414e+06	7.92154e+06	1.75479e+06	6.07076e+06	7.6189e+06	7.71092e+06	6.9032e+06	8.95798e+06	5.96863e+06	6.15347e+06	7.12433e+06	6.42182e+06	5.51322e+06	7.59159e+06	5.77953e+06	5.41583e+06	4.85613e+06	7.46839e+06	5.3901e+06	6.1726e+06	6.01526e+06	7.749e+06	6.3011e+06	4.75029e+06	8.15941e+06
Com_685_pos	Oleoyl ethanolamide	C20 H39 N O2	325.299	15.043	326.306	Full match	No results	No results	6.88488e+06	5.35277e+06	1.96832e+08	2.06218e+08	6.85112e+06	1.22692e+07	1.39892e+07	2.35425e+08	2.08875e+08	2.58747e+08	1.60091e+08	4.585e+06	1.35922e+07	4.12881e+07	7.82114e+06	5.40173e+06	1.54909e+07	8.99215e+06	1.61926e+07	5.7268e+06	3.97837e+07	1.308e+07	4.00938e+07	8.25698e+06	4.58964e+06	1.25959e+07	1.80944e+08	3.10957e+08	8.47641e+06	612363323	6.43571e+06	3.95713e+08	7.30851e+06	7.49694e+06	2.05435e+07	3.68779e+06	1.96242e+07	7.68217e+06	7.98208e+06	1.4224e+07	2.27196e+07
Com_68_pos	L-Phenylalanine	C9 H11 N O2	165.079	4.986	166.087	Full match	Full match	Full match	5127276596	3874413408	4858950824	5615979823	3701689864	2392515049	3900352116	4661288621	4394685497	4585651050	4796896987	3583709234	3803991732	5070102656	5479848482	2445292919	3624547728	4299461802	4720225919	3812042395	4378723206	8002696644	7115719160	5583968418	2348274812	4846993073	3364303264	5129554500	5359027351	5500092836	5524365650	6028947439	3978553285	6961506477	5258471387	5155698885	3779976708	5397149528	5839348307	3585843197	6380751430
Com_6917_pos	Monoolein	C21 H40 O4	334.308	15.164	335.315	Invalid mass	No results	No results	6.98988e+06	1.04008e+07	1.14243e+07	5.41099e+06	4.86719e+06	3.93261e+06	3.75538e+06	5.46268e+06	4.24592e+06	6.46506e+06	6.83004e+06	9.25388e+06	1.50668e+07	8.25747e+06	6.998e+06	6.73754e+06	4.96873e+06	5.3208e+06	8.07145e+06	5.9533e+06	6.24816e+06	9.00739e+06	6.84294e+06	6.62139e+06	8.49306e+06	7.7525e+06	1.16352e+07	1.14383e+07	1.35023e+07	4.80209e+06	8.78287e+06	4.5947e+06	1.1291e+07	6.32836e+06	6.0827e+06	4.44499e+06	4.15591e+06	5.23276e+06	1.44401e+07	9.23074e+06	4.7775e+06
Com_6928_pos	Arachidonoyl amide	C20 H33 N O	303.256	10.788	304.264	Full match	No results	No results	190952	353589	4.51956e+06	7.06174e+06	264986	277181	189106	5.08165e+06	7.27028e+06	1.1103e+07	1.36382e+07	327905	224209	560249	175019	396565	432408	470597	699149	749302	907207	1.95804e+06	2.88954e+06	236727	256973	178888	1.00284e+06	9.79352e+06	323441	1.35922e+07	373547	9.95101e+06	476761	256980	477567	210858	320209	302106	260328	298805	368562
Com_692_pos	LPC 22:6	C30 H50 N O7 P	567.334	14.423	568.342	No results	Full match	No results	5.25167e+08	4.8749e+08	275152912	3.06746e+08	2.33295e+08	1.82655e+08	1.5483e+08	3.58035e+08	3.71406e+08	3.8234e+08	5.8055e+08	3.76247e+08	1.8676e+08	2.76387e+08	1.76673e+08	2.13172e+08	2.67542e+08	5.31738e+08	2.22423e+08	5.42812e+08	2.88343e+08	2.95444e+08	232509751	2.62112e+08	2.16534e+08	1.90782e+08	3.33575e+08	561598309	3.17605e+08	3.75741e+08	3.08788e+08	3.18571e+08	2.56519e+08	2.90093e+08	317053670	1.74143e+08	2.81904e+08	3.80878e+08	267068447	1.9986e+08	1.83994e+08
Com_693_pos	PC (19:1/19:2)	C46 H86 N O8 P	811.609	16.768	812.617	No results	Full match	No results	3.40788e+08	5.19014e+08	2.61919e+08	3.80933e+08	1.49867e+08	1.82595e+08	2.61584e+08	5.03708e+08	2.27468e+08	4.5955e+08	1.3748e+08	2.03621e+08	1.64136e+08	1.98388e+08	4.36767e+07	1.69586e+08	4.22744e+08	2.07443e+08	2.0108e+08	2.25976e+08	5.24143e+08	5.88489e+08	1.50627e+08	4.22535e+08	2.85839e+08	2.42885e+08	1.29621e+08	2.76454e+08	2.39919e+08	2.84271e+08	3.88708e+08	8.02004e+07	2.86572e+08	1.31818e+08	1.46986e+08	1.3138e+08	1.20886e+08	3.63333e+08	1.28468e+08	133212902	9.83912e+07
Com_701_pos	SM (d23:2/19:1)	C47 H91 N2 O6 P	810.662	16.102	811.67	No results	Full match	No results	5.68596e+08	3.08492e+08	3.19656e+08	4.51016e+08	2.40218e+08	1.46676e+08	1.82483e+08	2.5899e+08	3.28538e+08	2.39705e+08	1.99565e+08	1.85706e+08	3.70779e+08	1.13376e+08	1.66139e+08	2.14693e+08	3.57766e+08	3.22889e+08	2.70006e+08	3.20047e+08	1.29584e+08	1.96645e+08	1.79352e+08	3.20385e+08	3.17094e+08	3.05965e+08	3.11298e+08	4.01214e+08	4.15841e+08	2.3344e+08	335995271	3.40634e+08	3.1453e+08	1.356e+08	2.01674e+08	1.73986e+08	2.18517e+08	2.51629e+08	3.87095e+08	127521582	2.38392e+08
Com_7068_pos	Glucose 1-phosphate	C6 H13 O9 P	260.03	1.384	261.038	Full match	Full match	Full match	7.16802e+06	6.02757e+06	6.35841e+06	7.00933e+06	4.45101e+06	3.72516e+06	3.88425e+06	4.66565e+06	5.57383e+06	4.80997e+06	1.35039e+07	8.83769e+06	6.45557e+06	4.6133e+06	6.09257e+06	2.40582e+06	4.05726e+06	3.84523e+06	8.43436e+06	5.90777e+06	5.59611e+06	5.03239e+06	470202	5.75413e+06	3.61944e+06	8.64725e+06	4.20359e+06	4.68475e+06	5.51444e+06	4.28212e+06	9.30779e+06	7.59781e+06	6.35681e+06	7.0446e+06	4.7199e+06	5.49207e+06	6.90463e+06	4.77127e+06	7.602e+06	4.39262e+06	3.5047e+06
Com_709_pos	PC (18:3e/22:4)	C48 H84 N O7 P	817.599	15.366	818.607	No results	Full match	No results	5.39279e+08	3.30052e+08	3.30152e+08	2.51511e+08	1.92122e+08	2.05951e+08	2.98303e+08	3.61979e+08	3.47365e+08	3.34217e+08	3.49661e+08	3.39117e+08	4.36293e+08	3.11386e+08	3.19425e+08	2.26711e+08	2.79182e+08	3.15395e+08	3.42678e+08	3.33848e+08	2.93039e+08	2.87307e+08	2.83438e+08	3.77766e+08	351550108	3.09414e+08	3.88912e+08	4.34593e+08	3.39786e+08	329958207	4.47419e+08	3.88364e+08	3.36638e+08	243367748	2.77001e+08	2.26226e+08	1.84274e+08	3.64042e+08	3.71562e+08	2.62968e+08	3.10774e+08
Com_719_pos	PC (14:0e/19:2)	C41 H80 N O7 P	729.569	15.607	730.577	No results	Full match	No results	3.00302e+08	3.89996e+08	3.60897e+08	3.81206e+08	1.91441e+08	1.84174e+08	2.65347e+08	475388079	2.20918e+08	3.51619e+08	3.06214e+08	3.41283e+08	2.4284e+08	2.86961e+08	5.00893e+08	1.86759e+08	199348066	2.58167e+08	3.89746e+08	286578051	3.5076e+08	2.86827e+08	2.61644e+08	3.35168e+08	4.66368e+08	2.98901e+08	4.27127e+08	5.00033e+08	324286139	4.68736e+08	5.66462e+08	345075116	3.31922e+08	4.07653e+08	3.10983e+08	3.10582e+08	173392618	4.15848e+08	2.37611e+08	3.47061e+08	1.33308e+08
Com_7260_pos	PC (16:2e/20:0)	C44 H86 N O7 P	754.59	15.51	755.598	No results	Invalid mass	No results	6.02405e+06	8.0932e+06	8.92527e+06	6.63841e+06	4.97074e+06	3.7084e+06	4.87532e+06	8.9352e+06	6.0517e+06	1.27793e+07	5.84979e+06	8.63186e+06	8.66422e+06	4.87092e+06	4.12182e+06	6.88035e+06	4.57448e+06	6.83637e+06	6.90129e+06	6.61391e+06	5.15607e+06	8.89937e+06	3.56676e+06	9.4198e+06	7.22933e+06	6.74816e+06	8.34775e+06	1.06286e+07	1.07769e+07	6.38246e+06	9.43759e+06	1.08524e+07	1.03444e+07	6.69141e+06	7.90829e+06	3.5503e+06	2.36289e+06	7.08172e+06	9.9728e+06	3.83039e+06	7.06518e+06
Com_72_pos	Choline	C5 H13 N O	103.1	1.192	104.107	Full match	Full match	No results	4473274095	1141332281	3872784992	2727168126	1001874368	9.22987e+08	2507438904	1599364618	1040930787	2328811780	2094474978	9.14358e+08	1063275396	3586401791	5470571713	6.3738e+08	1328078458	3333795886	3367256837	1941930443	2307900356	4432652791	6869132524	1452019567	5.94454e+08	5273261979	3493596539	5653671048	2044324979	3618937288	1907157933	3563190664	1316860160	2534387323	3536887446	1741962281	1751299949	2078291712	1183920142	1484647696	2270349277
Com_7331_pos	8-(1,2-dihydroxy-3-methylbut-3-en-1-yl)-7-methoxy-2H-chromen-2-one	C15 H16 O5	276.096	9.895	277.103	Invalid mass	No results	No match	126965	127476	137463	220767	6.02462e+06	5.04892e+06	4.61567e+06	117492	3.81396e+06	133610	130434	135076	152831	119621	840551	5.74773e+06	2.65453e+06	127729	140248	112824	121449	117671	5.99674e+06	143211	1.28174e+06	543339	154444	161677	177965	135917	148907	149740	154244	664911	142295	4.46633e+06	5.54421e+06	2.47409e+06	634531	3.77535e+06	6.52595e+06
Com_7352_pos	5-chloro-6-(trifluoromethyl)-1,3-dihydro-2H-benzimidazole-2-thione	C8 H4 Cl F3 N2 S	251.973	1.553	252.981	Full match	No results	No results	4.3604e+06	3.72113e+06	4.71162e+06	5.1597e+06	3.51394e+06	3.45939e+06	2.73803e+06	4.15837e+06	4.34132e+06	4.73607e+06	6.23092e+06	4.40615e+06	5.88463e+06	3.94765e+06	5.37882e+06	2.93146e+06	3.03084e+06	4.65662e+06	5.04095e+06	4.96139e+06	5.06527e+06	4.83332e+06	7.24378e+06	5.70642e+06	4.81366e+06	4.63438e+06	2.62286e+06	2.7363e+06	3.76201e+06	3.05941e+06	2.97307e+06	4.03052e+06	2.95684e+06	4.1976e+06	3.00609e+06	2.81628e+06	2.82705e+06	3.90597e+06	3.88849e+06	2.81553e+06	2.84246e+06
Com_7385_pos	PC (16:0/16:1)	C40 H78 N O8 P	731.543	13.614	732.548	No results	Invalid mass	No results	5.44957e+06	5.68382e+06	6.10866e+06	6.16465e+06	4.47312e+06	5.54961e+06	5.41387e+06	1.07958e+07	1.76805e+06	1.02865e+07	5.31583e+06	5.96816e+06	5.91717e+06	4.53457e+06	4.80364e+06	3.32616e+06	5.00883e+06	7.24287e+06	1.19889e+07	5.84381e+06	1.11716e+07	4.27052e+06	4.50947e+06	6.38537e+06	4.93015e+06	6.80285e+06	6.43228e+06	6.03417e+06	4.41983e+06	6.85074e+06	6.74345e+06	3.58234e+06	6.60052e+06	9.43167e+06	6.87295e+06	3.74796e+06	2.95421e+06	6.42862e+06	4.84613e+06	4.31406e+06	3.9404e+06
Com_73_pos	PC (16:2e/2:0)	C26 H50 N O7 P	519.334	14.527	520.341	No results	Full match	Full match	2115577741	7451856065	2370826986	7673066800	3426214119	2594561840	1189567818	4667301754	5124639766	2436453512	3414557165	11074977143	7955783806	2573006833	1755166112	7274887260	3574380670	2260681444	2699479887	8807710069	9164136726	3422971623	7.01965e+08	5032808691	5879362588	3544035412	4830544766	4222367050	4588639009	9585801222	4465869460	4516064297	6083242432	3616108659	3230693438	5168193728	3875209555	2119014077	4016664341	3283788886	1728697507
Com_7405_pos	Υ-L-Glutamyl-L-glutamic acid	C10 H16 N2 O7	276.096	1.366	277.104	Full match	No results	Full match	2.05752e+06	4.60309e+06	4.35116e+06	7.24728e+06	3.2829e+06	2.03107e+06	5.71331e+06	3.70547e+06	6.88108e+06	2.99175e+06	5.28739e+06	2.09992e+06	1.86654e+06	5.56406e+06	3.10617e+06	6.66481e+06	2.43088e+06	3.97545e+06	5.36049e+06	4.58481e+06	3.53709e+06	4.82849e+06	2.76303e+06	3.51329e+06	1.33901e+06	4.48179e+06	5.8631e+06	5.20988e+06	3.49509e+06	3.41741e+06	2.32532e+06	5.85813e+06	2.30233e+06	4.04299e+06	5.00502e+06	6.32471e+06	4.48768e+06	2.53876e+06	2.81173e+06	2.87772e+06	4.41532e+06
Com_7450_pos	PC (20:2/20:2)	C48 H88 N O8 P	837.624	14.927	838.631	No results	Full match	No results	4.08661e+06	5.55434e+06	4.19428e+06	6.43844e+06	4.65888e+06	5.57265e+06	6.44286e+06	4.87016e+06	6.43302e+06	7.33375e+06	5.02211e+06	3.17341e+06	9.91663e+06	8.17003e+06	3.90132e+06	4.54643e+06	2.33001e+06	4.21568e+06	6.30564e+06	2.95522e+06	3.80544e+06	5.53295e+06	4.10357e+06	5.3945e+06	8.66234e+06	5.09346e+06	9.1004e+06	8.43027e+06	1.04373e+07	6.47385e+06	1.10627e+07	9.65841e+06	6.90764e+06	7.44256e+06	1.23769e+07	5.70498e+06	6.08761e+06	3.43729e+06	9.45759e+06	5.09447e+06	9.42838e+06
Com_7485_pos	All trans-Retinal	C20 H28 O	284.215	14.389	285.221	No results	No results	Full match	2.37495e+06	1.91857e+06	2.07974e+06	2.16038e+06	1.73175e+06	1.44444e+06	2.63398e+06	1.98464e+06	1.63791e+06	2.49019e+06	3.07746e+06	2.45508e+06	2.66239e+06	2.89186e+06	2.30683e+06	1.8085e+06	1.85777e+06	2.34864e+06	3.11196e+06	2.60395e+06	1.89949e+06	2.49081e+06	7.00586e+06	3.10772e+06	2.32375e+06	2.91085e+06	2.87235e+06	1.75531e+06	3.28221e+06	2.31248e+06	2.78997e+06	2.53466e+06	3.05227e+06	2.33662e+06	2.1804e+06	1.91475e+06	1.82638e+06	2.73533e+06	1.76808e+06	2.09124e+06	1.92302e+06
Com_748_pos	LPE 18:0	C23 H48 N O7 P	481.318	15.02	482.325	No results	Full match	Full match	1.69715e+08	1.51885e+08	1.21225e+08	1.92249e+08	1.17563e+08	1.17588e+08	1.0474e+08	1.16982e+08	1.40062e+08	122023301	149574941	1.06383e+08	1.14809e+08	1.75873e+08	4.64192e+08	109313314	1.41234e+08	1.55195e+08	1.07525e+08	2.94379e+08	1.66479e+08	2.29926e+08	4.27986e+07	1.289e+08	9.64583e+07	1.93253e+08	1.63041e+08	1.21912e+08	1.74612e+08	1.19729e+08	8.49335e+07	1.5827e+08	9.84783e+07	1.23545e+08	1.29414e+08	7.20492e+07	9.88845e+07	1.17763e+08	6.33909e+07	7.81549e+07	1.06401e+08
Com_749_pos	Indole-3-acetic acid	C10 H9 N O2	175.064	9.415	176.071	Full match	Full match	Full match	105834567	3.35444e+08	9.91098e+07	1.3606e+08	8.08125e+07	3.59095e+07	8.3231e+07	1.02745e+08	1.32508e+08	1.72092e+08	1.15847e+08	2.07439e+08	1.34256e+08	1.17308e+08	9.97064e+07	9.23104e+07	1.27292e+08	1.05437e+08	1.26408e+08	139654234	1.83004e+08	1.40666e+08	7.30123e+07	1.79672e+08	1.05169e+08	1.43714e+08	1.03384e+08	2.84768e+08	3.3751e+08	8.95013e+07	1.076e+08	7.11861e+07	4.31148e+07	1.97474e+08	1.0887e+08	5.62834e+07	9.46443e+07	1.26793e+08	1.30208e+08	1.12172e+08	9.01877e+07
Com_7548_pos	1-Methyladenosine	C11 H15 N5 O4	281.113	1.559	282.12	Full match	Full match	Full match	7.5009e+06	7.25563e+06	7.68467e+06	8.74465e+06	5.53037e+06	5.36611e+06	6.44652e+06	6.78834e+06	5.91996e+06	7.93147e+06	7.29039e+06	7.15488e+06	8.26945e+06	7.67466e+06	7.6462e+06	5.79254e+06	4.50549e+06	5.21409e+06	7.14631e+06	5.80682e+06	7.11689e+06	7.27453e+06	350348	9.00503e+06	7.30936e+06	5.78056e+06	2.54269e+06	1.08511e+07	1.35984e+07	5.05482e+06	1.03288e+07	1.09782e+07	9.38264e+06	1.15736e+07	7.57416e+06	5.57053e+06	7.96741e+06	8.68276e+06	7.91685e+06	5.8429e+06	7.10162e+06
Com_7566_pos	4-methoxy-6-(prop-2-en-1-yl)-2H-1,3-benzodioxole	C11 H12 O3	192.08	9.649	193.087	Invalid mass	No results	No results	3.39289e+06	1.49047e+06	2.9847e+06	2.29269e+06	206228	189159	4.75948e+06	2.71079e+06	202748	1.06328e+07	9.42086e+06	1.20367e+07	3.43706e+06	4.25315e+06	206019	176110	211512	3.42562e+06	1.30458e+06	3.56292e+06	2.68354e+06	2.29951e+06	184314	1.78763e+06	5.04021e+06	190346	5.50744e+06	1.08991e+07	1.02567e+07	4.63914e+06	6.95744e+06	5.48925e+06	7.57768e+06	6.91905e+06	5.64735e+06	3.08195e+06	207967	4.34096e+06	4.85814e+06	3.21402e+06	237412
Com_7574_pos	2-(3,4-dihydroxyphenyl)acetamide	C8 H9 N O3	207.051	5.413	208.059	Invalid mass	No results	No results	1.91881e+06	1.22033e+06	1.23881e+06	1.74908e+06	2.01358e+06	2.94583e+06	4.3434e+06	1.97033e+06	3.18569e+06	1.25713e+06	1.70186e+06	1.79933e+06	2.12882e+06	1.82619e+06	1.92806e+06	3.2123e+06	2.05864e+06	1.52063e+06	1.65156e+06	1.78574e+06	1.49932e+06	1.96566e+06	6.84563e+06	1.47101e+06	1.85651e+06	2.30373e+06	1.11681e+06	1.80231e+06	1.98314e+06	1.49644e+06	1.61673e+06	1.404e+06	1.40512e+06	1.49859e+06	1.7199e+06	2.91856e+06	3.05174e+06	2.25758e+06	2.01478e+06	2.39739e+06	2.69046e+06
Com_757_pos	α-Pinene-2-oxide	C10 H16 O	152.12	11.921	153.128	Full match	No results	No results	2.65057e+07	2.81521e+07	2.79524e+07	2.64601e+07	7.11717e+07	6.62001e+07	6.71281e+07	2.58673e+07	6.63532e+07	2.77736e+07	2.92553e+07	3.00647e+07	3.03316e+07	2.74274e+07	4.53948e+07	5.07323e+07	5.46613e+07	2.71948e+07	3.06267e+07	2.60688e+07	2.64432e+07	2.6882e+07	3.07958e+08	2.88423e+07	3.50372e+07	4.06031e+07	3.24971e+07	3.33543e+07	3.29967e+07	2.80942e+07	2.95148e+07	3.008e+07	2.93172e+07	3.55187e+07	2.98099e+07	8.11591e+07	6.82843e+07	4.17183e+07	3.34369e+07	5.78137e+07	5.37999e+07
Com_762_pos	ACar 10:1	C17 H32 N O4	313.226	11.088	314.233	No results	Invalid mass	No results	1.13825e+08	8.68857e+07	9.14275e+07	7.39726e+07	8.19075e+07	5.51781e+07	3.39212e+07	1.22683e+08	7.31782e+07	1.94707e+08	6.16905e+07	308658841	3.31782e+08	2.26999e+08	4.96727e+07	4.42128e+07	3.83318e+07	5.11086e+08	6.91989e+07	5.70925e+07	8.25927e+07	5.21963e+07	1.5147e+08	1.43025e+08	1.01486e+08	8.5929e+07	7.49181e+07	8.45692e+07	9.36197e+07	1.23659e+08	1.0509e+08	5.54969e+07	1.00164e+08	8.47916e+07	8.23003e+07	5.71044e+07	8.10849e+07	1.11537e+08	2.6015e+08	5.21538e+07	7.91373e+07
Com_7631_pos	1-O-(3,4,5-Trimethoxybenzoyl)-beta-L-galactopyranose	C16 H22 O10	356.112	8.853	357.119	Invalid mass	No results	No results	2.31079e+06	3.03355e+06	1.00726e+06	1.63928e+06	2.33778e+06	1.54117e+06	553131	2.30997e+06	1.12541e+06	3.31486e+06	876652	1.45771e+06	1.5182e+06	1.53778e+06	227938	1.08899e+06	1.16706e+06	1.57794e+06	1.04694e+06	2.40576e+06	1.71894e+06	1.28955e+06	168346	3.01561e+06	968645	631700	1.31304e+06	1.45118e+06	3.86902e+06	661016	1.21821e+07	2.68296e+06	1.59642e+06	3.97321e+06	1.06846e+06	384935	1.78903e+06	1.53384e+06	4.05806e+06	1.23628e+06	2.70787e+06
Com_7663_pos	(6E)-7-(2H-1,3-benzodioxol-5-yl)-1-(piperidin-1-yl)hept-6-en-1-one	C19 H25 N O3	337.164	16.884	338.172	Invalid mass	No results	No results	6.5584e+06	8.19235e+06	7.41097e+06	5.63512e+06	4.76556e+06	6.42674e+06	7.48869e+06	8148901	6.57957e+06	7.87243e+06	8.26623e+06	5.85079e+06	1.00653e+07	9.44339e+06	9.32519e+06	6.89229e+06	6.00913e+06	7.47e+06	5.17322e+06	4.79973e+06	7.71422e+06	1.08867e+07	5.13972e+06	6.76122e+06	8.90519e+06	6.91604e+06	9.61778e+06	7.67537e+06	8.9486e+06	9.92771e+06	9.57964e+06	8.85906e+06	9.23344e+06	9.17813e+06	9.66911e+06	3.9212e+06	5.39812e+06	5.79723e+06	7.75599e+06	4.53588e+06	5.40147e+06
Com_766_pos	5,8-dihydroxy-10-methyl-5,8,9,10-tetrahydro-2H-oxecin-2-one	C10 H14 O4	180.079	11.931	181.086	Invalid mass	No results	No match	5.98352e+07	5.00829e+07	7.34739e+07	6.34722e+07	1.24322e+08	4.38521e+07	1.56831e+08	9.40185e+07	2.02194e+08	2.93164e+07	3.2492e+08	437625609	8.56764e+07	1.16911e+08	8.07712e+07	5.81774e+07	3.37344e+07	6.3419e+07	3.21933e+07	1.04239e+08	4.92236e+07	5.1793e+07	5.32096e+07	3.17639e+07	127894822	3.90508e+07	5.43779e+08	3.62472e+08	2.36172e+08	2.17917e+08	1.35634e+08	1.17148e+08	1.49765e+08	2.84697e+08	1.96066e+08	2.33542e+08	3.20696e+07	1.60301e+08	285352194	1.28244e+08	3.23685e+07
Com_76_pos	Palmitic Acid	C16 H32 O2	273.267	12.014	274.274	Invalid mass	No results	No results	5.02491e+08	5.71808e+08	3.38702e+08	4.16259e+08	2.62018e+08	3.32195e+08	3.39646e+08	3.45154e+08	3.51311e+08	3.95792e+08	4.1426e+08	5.27135e+08	7.06419e+08	4.37302e+08	5.90558e+08	3.22195e+08	3.77274e+08	3.83719e+08	5.1432e+08	4.12795e+08	3.95691e+08	4.15378e+08	2.71524e+08	1016466566	1201270768	6.75859e+08	1088497611	8.21306e+08	8.38353e+08	5.45428e+08	5.92708e+08	3.89035e+08	6.78743e+08	327399044	7.9883e+08	3.10134e+08	3.92888e+08	5.02334e+08	4.42371e+08	391300469	3.19638e+08
Com_773_pos	PC (14:0e/3:0)	C25 H52 N O7 P	492.323	15.013	493.328	No results	Invalid mass	No results	1.88159e+08	128751526	1.278e+08	449619045	9.52429e+07	7.74743e+07	1.13591e+08	3.26912e+08	1.49167e+08	1.68704e+08	2.48448e+08	2.55652e+08	1.106e+08	1.505e+08	1.83055e+08	1.44914e+08	152882119	2.95286e+08	1.16276e+08	3.02357e+08	1.81678e+08	4.89209e+08	4.34954e+07	1.32199e+08	9.06134e+07	2.08423e+08	2.37847e+08	2.26583e+08	209126565	2.28284e+08	1.2627e+08	2.02731e+08	2.29051e+08	131055940	1.2745e+08	9.10411e+07	1.46644e+08	105795635	8.50663e+07	9.7368e+07	1.00899e+08
Com_776_pos	L-Threonine	C4 H9 N O3	119.059	1.347	120.066	Full match	Full match	Full match	1.56609e+08	1.06964e+08	117718399	1.37655e+08	1.33114e+08	1.30044e+08	1.11155e+08	1.19326e+08	1.15816e+08	1.35021e+08	1.61535e+08	1.38637e+08	216085070	1.49711e+08	1.32182e+08	9.86138e+07	1.00674e+08	1.76362e+08	1.70942e+08	117012293	1.06308e+08	1.28301e+08	299977250	1.66673e+08	132842341	1.10587e+08	1.13101e+08	1.6713e+08	1.73619e+08	1.07863e+08	1.12058e+08	1.10526e+08	1.19228e+08	184458203	1.08902e+08	8.00073e+07	9.35656e+07	1.45056e+08	1.15732e+08	1.12864e+08	1.52787e+08
Com_7772_pos	Allantoin	C4 H6 N4 O3	158.045	1.307	159.052	No results	No results	Full match	1.77067e+06	1.09496e+06	1.39686e+06	1.02288e+06	665170	789628	716820	817969	1.01056e+06	1.65632e+06	1.46725e+06	1.19307e+06	1.02175e+06	1.36508e+06	1.29619e+06	548391	726454	868646	1.55564e+06	1.15402e+06	695336	1.12366e+06	6.50458e+06	1.45506e+06	1.44937e+06	1.55779e+06	1.33441e+06	1.02167e+06	1.10749e+06	1.06069e+06	1.00021e+06	929531	1.02501e+06	1.15161e+06	926768	817711	880981	893905	1.10239e+06	949857	849417
Com_7777_pos	PC (15:0/15:0)	C38 H76 N O8 P	705.531	14.793	706.538	No results	Full match	No results	654027	692570	1.24977e+06	732048	727518	791297	619173	691930	1.01091e+06	645502	734311	673236	654350	596005	577158	1.51574e+06	985107	740596	705223	836052	901923	667223	739512	655167	560995	567555	728412	951675	819802	741698	668222	723028	661116	864648	955268	1.93446e+06	7.96768e+06	582616	600596	545288	436317
Com_7789_pos	Homotaurine	C3 H9 N O3 S	139.031	1.266	140.038	No results	No results	Full match	3.12693e+06	3.01304e+06	3.25754e+06	6.54971e+06	3.67085e+06	3.26982e+06	2.81629e+06	4.88822e+06	4.92701e+06	6.61418e+06	7.27331e+06	8.58316e+06	1.22446e+07	3.36206e+06	3.1061e+06	2.13857e+06	4.77459e+06	3.74809e+06	3.79206e+06	4.23075e+06	4.84917e+06	3.7549e+06	1.65684e+06	5.14613e+06	5.98548e+06	3.51984e+06	4.99461e+06	6.23833e+06	4.33955e+06	3.21419e+06	4.81045e+06	5.83973e+06	3.30046e+06	3.22768e+06	4.26902e+06	2.06006e+06	3.87938e+06	4.80359e+06	5.09969e+06	6.05633e+06	5.55385e+06
Com_785_pos	SM (d15:1/18:0)	C38 H77 N2 O6 P	688.553	15.716	689.561	No results	Full match	No results	3.1487e+08	3.65929e+08	2.05262e+08	1.84522e+08	2.29756e+08	289234342	2.41435e+08	162874763	205341521	2.97865e+08	2.68188e+08	1.94528e+08	4.66134e+08	2.90127e+08	2.27776e+08	1.15639e+08	2.12871e+08	2.75293e+08	2.84073e+08	1.10344e+08	243273522	2.67195e+08	1.97422e+08	3.10219e+08	300337759	2.15344e+08	2.79621e+08	2.42199e+08	2.28758e+08	4.90993e+08	3.38218e+08	3.80793e+08	2.122e+08	2.05819e+08	4.0958e+08	1.00261e+08	2.35091e+08	2.48387e+08	3.11803e+08	1.68824e+08	2.54064e+08
Com_787_pos	PE (18:1/18:1)	C41 H78 N O8 P	743.547	15.114	744.555	No results	Full match	No results	2.51892e+08	132748452	8.13499e+07	9.99185e+07	7.89898e+07	8.98265e+07	2.26906e+08	3.05958e+08	1.13548e+08	1.41307e+08	1.16539e+08	1.85635e+08	1.24901e+08	1.0918e+08	1.69266e+08	8.68693e+07	424391738	1.15886e+08	2.33938e+08	1.39215e+08	1.67917e+08	1.32886e+08	8.06324e+07	1.31988e+08	6.70297e+07	1.40738e+08	2.01231e+08	2.09981e+08	1.24842e+08	9.63981e+07	3.03834e+08	9.42128e+07	1.988e+08	2.03656e+08	1.58806e+08	1.55051e+08	5.12288e+07	2.72687e+08	6.7981e+07	1.06273e+08	9.16655e+07
Com_79_pos	5α-Dihydrotestosterone glucuronide	C25 H38 O8	466.255	13.069	467.263	Full match	No results	No results	7.39475e+06	5.70859e+06	5.13186e+06	5.00086e+06	5825113679	2777347856	5377560634	1.05385e+07	5688375992	1.13068e+07	6.19202e+06	5.15857e+06	5.60717e+06	4.9421e+06	7.69502e+08	5124657112	7.9171e+08	4.96067e+06	5.16432e+06	4.1723e+06	5.01852e+06	4.76879e+06	6.45082e+08	5.38751e+06	4.15439e+08	4.62427e+08	9.03578e+06	9.94904e+06	1.02966e+07	7.64428e+06	8.18886e+06	7.98036e+06	7.93752e+06	449097199	7.00942e+06	4748864860	4520172170	4.48043e+08	2.57576e+08	3743268114	3167171719
Com_8007_pos	(5-L-Glutamyl)-L-Amino Acid	C8 H14 N2 O5	218.09	1.577	219.097	No results	No results	Full match	5.44916e+06	7.59425e+06	1.70706e+06	4.02172e+06	4.09657e+06	2.55742e+06	1.8476e+06	5.20599e+06	3.71427e+06	4.24493e+06	3.65584e+06	4.3475e+06	6.97028e+06	3.4709e+06	2.84357e+06	5.52706e+06	2.77869e+06	3.19658e+06	2.24267e+06	4.17298e+06	3.0714e+06	2.42339e+06	1.68039e+06	3.73224e+06	4.33619e+06	3.26937e+06	3.74947e+06	3.90986e+06	4.33762e+06	3.42825e+06	4.71965e+06	4.20516e+06	3.69558e+06	3.0834e+06	3.16826e+06	1.86448e+06	2.83198e+06	5.01202e+06	4.6563e+06	3.14767e+06	5.7888e+06
Com_805_pos	SM (d22:2/14:0)	C41 H81 N2 O6 P	728.585	16.415	729.591	No results	Full match	No results	3.62176e+08	3.98837e+08	3.75066e+08	2.74049e+08	2.39567e+08	2.50113e+08	2.81563e+08	1.94515e+08	2.98787e+08	3.49319e+08	3.38712e+08	1.92763e+08	4.16069e+08	3.09776e+08	2.98429e+08	2.10973e+08	2.33276e+08	3.5887e+08	3.07614e+08	150517006	3.01697e+08	359397966	159173267	4.76497e+08	4.11209e+08	2.63464e+08	4.33512e+08	3.95566e+08	4.5935e+08	2.87173e+08	315099477	4.45855e+08	3.17938e+08	3.83536e+08	4.6838e+08	1.89286e+08	2.36024e+08	3.87767e+08	4.33373e+08	380372900	2.38596e+08
Com_814_pos	N-Phenylacetylglutamine	C13 H16 N2 O4	264.112	7.605	265.119	Full match	Full match	Full match	6.18198e+07	2.27753e+08	6.747e+07	5.84566e+07	3.52267e+07	3.44547e+07	9.2804e+07	2.56447e+07	1.26553e+08	9.60867e+07	201139736	5.97665e+07	8.22908e+07	3.0478e+07	9.62685e+06	1.84221e+07	1.54021e+08	2.90482e+07	7.41189e+07	6.87496e+07	8.03776e+07	1.46919e+08	4.78892e+06	1.86611e+08	125494471	7.46896e+07	1.2311e+08	1.60932e+08	5.83667e+08	4.13292e+07	8.39236e+07	5.11586e+07	5.49531e+07	4.73931e+08	1.62667e+08	3.08482e+07	4.68275e+07	339333885	1.18993e+08	5.72836e+07	5.38584e+07
Com_8158_pos	Gly-Tyr	C11 H14 N2 O4	238.096	6.469	221.093	No results	No results	Full match	906772	797430	902276	824274	676721	611930	135694	3.43093e+06	817475	967013	824053	906133	1.01893e+06	834315	732340	528326	130918	949991	879641	811590	254700	749559	668975	1.04913e+06	881718	825600	269531	656303	926123	669896	321562	1.02987e+06	828861	755877	659630	497478	412421	688719	295899	587768	8.29894e+06
Com_816_pos	3-(5,7-dimethoxy-4-oxo-4H-chromen-2-yl)propanoic acid	C14 H14 O6	278.077	9.659	279.084	Invalid mass	No results	No results	9.0601e+07	3.3713e+07	1.63413e+08	1.09429e+08	5.72375e+07	6.21556e+07	2.40406e+08	1.122e+08	6.8002e+07	3.94942e+08	4.81391e+08	2.67436e+08	1.56603e+08	1.48354e+08	3.25403e+07	81234149	8.80186e+07	1.41257e+08	2.85827e+07	1.24584e+08	124422573	8.54904e+07	8.21528e+07	4.58793e+07	2.04305e+08	4.19313e+07	136196391	2.70108e+08	2.31485e+08	1.10372e+08	201170807	1.47293e+08	1.99332e+08	2.27724e+08	1.9175e+08	123388011	2.8168e+07	1.41236e+08	1.80768e+08	1.33682e+08	8.06775e+07
Com_823_pos	D-Serine	C3 H7 N O3	105.043	1.284	106.05	Full match	Full match	Full match	122672681	9.47299e+07	1.00839e+08	102371942	8.06375e+07	6.9388e+07	9.00492e+07	8.82908e+07	8.69655e+07	1.16858e+08	1.32054e+08	9.98118e+07	1.08735e+08	1.30352e+08	108658907	7.16571e+07	9.38335e+07	1.33059e+08	1.91813e+08	1.25186e+08	1.4234e+08	122492039	276628121	1.38672e+08	9.98742e+07	1.27781e+08	6.72758e+07	5.87379e+07	6.85153e+07	7.16041e+07	7.27195e+07	5.51636e+07	5.17541e+07	6.83695e+07	8.95066e+07	5.31193e+07	5.05107e+07	5.38819e+07	6.61252e+07	6.6582e+07	9.75021e+07
Com_824_pos	2,4-dihydroxyheptadec-16-en-1-yl acetate	C19 H36 O4	350.244	14.503	351.251	Invalid mass	No results	No results	3.7867e+07	2.27831e+07	1.31962e+07	4.11652e+07	1.80151e+08	7.84868e+07	2.03638e+07	1.128e+08	3.42162e+07	2.47654e+07	112634376	4.90683e+07	4.11128e+07	2.28504e+07	2.88612e+07	3.2841e+07	6.69593e+07	6.54198e+07	2.43291e+07	4.13321e+08	3.40825e+07	1.60334e+07	1.77164e+07	3.31664e+07	2.18217e+07	1.3917e+07	2.0806e+07	2.02718e+07	3.37108e+07	1.8832e+07	2.52384e+07	9.51026e+07	1.63544e+07	4.91383e+07	2.44236e+07	1.42567e+07	2.26791e+07	7.41158e+07	3.61065e+07	2.07423e+07	6.2836e+07
Com_8340_pos	ethyl 4-methyl-2-(1H-pyrrol-1-yl)-1,3-thiazole-5-carboxylate	C11 H12 N2 O2 S	236.063	1.072	237.07	Full match	No results	No results	1.08189e+06	1.1916e+06	745636	1.19392e+06	1.17954e+06	733537	705857	1.28243e+06	943856	784036	1.33947e+06	969229	1.04136e+06	1.20422e+06	810495	610852	450075	1.20641e+06	917687	952509	840766	577427	5.57376e+06	792919	760481	689646	1.12936e+06	953235	779841	855650	1.23298e+06	1.04974e+06	580770	758364	1.01579e+06	525279	818840	598901	1.59022e+06	684431	530958
Com_834_pos	EPK	C16 H28 N4 O6	372.205	14.836	373.212	Invalid mass	No results	No results	1.79675e+08	6.09382e+07	9.46833e+07	3.88643e+07	7.73181e+07	3.51076e+07	9.68334e+07	100638395	4.27011e+07	1.05988e+08	1.48332e+08	4.86796e+07	9.00456e+07	8.28737e+07	6.43388e+07	2.87099e+07	6.25432e+07	1.04266e+08	4.27724e+07	4.19417e+07	3.96492e+07	4.48904e+07	2.71342e+08	5.76813e+07	6.51988e+07	6.68787e+07	7.11439e+07	1.2229e+08	6.47727e+07	5.93419e+07	8.34649e+07	4.67055e+07	9.50748e+07	7.41942e+07	8.00361e+07	3.69218e+07	4.9081e+07	1.25463e+08	1.51658e+08	3.46185e+07	8.36853e+07
Com_835_pos	Sedanolide	C12 H18 O2	176.12	14.573	177.128	Invalid mass	No results	No results	2.13715e+08	2.53351e+08	1.60307e+08	1.23029e+08	8.13266e+07	1.53533e+08	1.71891e+07	1.04601e+08	2.06338e+08	1.85863e+08	1.78067e+08	6.6111e+07	8.06866e+07	1.19512e+08	4.42389e+07	1.71264e+08	1.30085e+08	3.53648e+08	1.41661e+08	2.19325e+08	1.47535e+08	2.88938e+08	230592448	1.11429e+08	1.12639e+08	2.7144e+07	1.64249e+08	1.37429e+08	116043110	4.51374e+08	8.70064e+07	1.74823e+08	1.46189e+08	7.32312e+07	1.39097e+08	9.28103e+07	1.24207e+08	5.68228e+07	8.3115e+07	8.5068e+07	111918902
Com_8393_pos	N-acetyl-L-ornithine	C7 H14 N2 O3	174.101	1.382	175.108	No results	No results	Full match	4.69775e+06	5.28987e+06	2.81043e+06	8.54035e+06	3.67296e+06	2.90627e+06	6.81932e+06	1.92943e+06	2.79076e+06	6.28397e+06	3.50517e+06	5.8255e+06	4.54666e+06	2.68537e+06	5.83317e+06	2.35389e+06	2.78815e+06	2.6787e+06	2.82904e+06	2.15144e+06	2.3875e+06	2.30297e+06	2.69695e+06	2.42828e+06	3.3411e+06	3.04644e+06	4.22841e+06	3.63456e+06	4.25333e+06	4.17673e+06	4.166e+06	9.41198e+06	2.61076e+06	3.7694e+06	4.12946e+06	4.56577e+06	970508	2.99483e+06	2.91108e+06	3.60583e+06	6.54561e+06
Com_8403_pos	PC (18:4e/22:4)	C48 H82 N O7 P	815.582	14.994	816.589	No results	Full match	No results	7.67815e+06	4.14097e+06	5.09318e+06	3.52679e+06	4.04831e+06	3.43916e+06	5.13803e+06	4.78439e+06	3.18556e+06	4.01187e+06	9.46206e+06	6.31094e+06	8.90798e+06	8.51316e+06	5.19074e+06	2.90091e+06	4.67562e+06	4.94555e+06	6.44159e+06	5.89322e+06	3.97121e+06	3.23209e+06	3.77509e+06	4.82827e+06	6.10201e+06	6.50607e+06	9.21255e+06	8.18865e+06	5.96793e+06	7.52735e+06	6.5084e+06	8.69815e+06	7.33012e+06	5.52109e+06	5.62102e+06	3.42177e+06	3.50434e+06	6.24262e+06	6.3594e+06	5.08675e+06	7.72949e+06
Com_841_pos	Camptothecin	C20 H16 N2 O4	370.095	14.745	371.102	Invalid mass	No results	No results	4.25988e+07	7.58331e+07	5.24648e+07	7.1402e+07	5.49547e+07	4.67751e+07	3.39661e+07	9.9965e+07	5.24759e+07	7.95062e+07	7.93827e+07	6.69666e+07	4.37774e+07	6.97845e+07	6.65519e+07	3.73242e+07	3.97776e+07	6.98076e+07	7.24199e+07	5.99697e+07	5.34283e+07	6.45602e+07	4.2121e+07	1.09458e+08	7.44651e+07	6.19229e+07	1.13243e+08	1.11193e+08	1.40129e+08	9.3993e+07	484769486	3.63887e+07	1.09951e+08	7.20324e+07	9.90801e+07	6.33553e+07	7.14555e+07	104419797	1.0492e+08	8.81863e+07	6.12097e+07
Com_8453_pos	SM (d23:3/19:1)	C47 H89 N2 O6 P	808.643	14.129	809.65	No results	Full match	No results	4.83235e+06	3.25348e+06	1.63565e+06	5.95525e+06	5.35814e+06	4.17252e+06	5.13968e+06	3.67503e+06	4.03451e+06	5.58049e+06	3.85069e+06	6.18634e+06	1.01029e+07	5.78054e+06	5.77387e+06	2.37821e+06	5.15327e+06	7.41056e+06	8.72056e+06	8.1606e+06	4.96086e+06	2.076e+06	3.25161e+06	9.24166e+06	6.39024e+06	8.27023e+06	1.56074e+06	7.93108e+06	7.8275e+06	4.86555e+06	3.3175e+06	1.42022e+06	7.0065e+06	8.94511e+06	5.95298e+06	1.22158e+06	3.61787e+06	3.29957e+06	5.58559e+06	4.47547e+06	7.19544e+06
Com_848_pos	PC (18:3e/2:0)	C28 H52 N O7 P	545.35	14.715	546.357	No results	Full match	No results	1.11828e+08	253759760	132907841	1.81708e+08	114312721	9.55745e+07	4.87175e+07	2.1825e+08	6.17318e+07	8.62044e+07	1.88838e+08	1.23203e+08	7.41315e+06	6.58619e+07	1.18223e+08	1.66733e+08	1.63777e+08	1.46394e+08	1.08432e+08	3.99636e+08	1.53154e+08	2.55619e+07	8.16122e+07	2.68798e+08	1.092e+08	1.40665e+08	1.56868e+08	1.28579e+08	9.69107e+07	3.33319e+07	1.93881e+08	2.83698e+08	1.09182e+08	9.15869e+07	8.20116e+07	1.06486e+08	9.43477e+07	1.10008e+08	1.52826e+08	2.47498e+07	7.97275e+07
Com_8697_pos	(±)13-HpODE	C18 H32 O4	294.22	12.497	295.227	Invalid mass	No results	No match	650565	1.22637e+06	585553	821244	487196	508023	662791	1.02462e+06	453895	804360	794645	1.19356e+06	756921	1.269e+06	944026	842837	653155	1.48565e+06	831066	1.23728e+06	1.14746e+06	901542	5.16969e+06	1.30316e+06	935603	531908	812219	833757	1.28838e+06	644053	775413	947497	835087	647769	1.03499e+06	495382	977063	695602	608891	518610	561043
Com_869_pos	Sulfoacetic acid	C2 H4 O5 S	139.978	0.544	122.975	No results	No results	Full match	9.55002e+07	1.08989e+08	1.03099e+08	1.14561e+08	7.38192e+07	1.62046e+08	1.18394e+08	8.19626e+07	8.27479e+07	2.08895e+08	8.63541e+07	2.16663e+08	2.69123e+08	9.98006e+07	8.09716e+07	6.51426e+07	9.18447e+07	1.08776e+08	1.06792e+08	1.04156e+08	1.06191e+08	2.15283e+08	5.04192e+07	1.1131e+08	1.1252e+08	1.22695e+08	8.28883e+07	1.07611e+08	1.43685e+08	4.24162e+08	1.83031e+08	2.17865e+08	1.64796e+08	2.18112e+08	1.19299e+08	147147971	1.71224e+08	202294621	1.20147e+08	1.57801e+08	1.88276e+08
Com_8771_pos	PC (18:1e/22:4)	C48 H88 N O7 P	821.629	14.929	822.635	No results	Full match	No results	6.94418e+06	3.93509e+06	4.60698e+06	4.72485e+06	2.1202e+06	2.33692e+06	3.97002e+06	2.78841e+06	2.92424e+06	3.28651e+06	3.8904e+06	1.82071e+06	5.31635e+06	5.79033e+06	4.28467e+06	2.5045e+06	4.17966e+06	5.23946e+06	6.68764e+06	4.04078e+06	2.69052e+06	3.14228e+06	3.18206e+06	4.47379e+06	2.60628e+06	4.33535e+06	5.61603e+06	7.12435e+06	8.08381e+06	7.29798e+06	3.53363e+06	6.78958e+06	5.09243e+06	4.88014e+06	4.92898e+06	1.33197e+06	2.2691e+06	2.12985e+06	8.76546e+06	2.81018e+06	7.17171e+06
Com_8803_pos	3-(3-pyridinyl)propanoic acid	C8 H9 N O2	151.066	5.381	152.073	Invalid mass	No results	No results	1.36245e+06	1.25462e+06	1.25962e+06	1.22405e+06	1.3283e+06	913563	2.4923e+06	1.11962e+06	960494	1.32169e+06	1.22199e+06	1.18706e+06	1.2663e+06	1.20241e+06	1.02208e+06	1.24619e+06	909074	1.10674e+06	1.20445e+06	1.11877e+06	1.03901e+06	1.0216e+06	5.01897e+06	1.23926e+06	1.04631e+06	1.42878e+06	1.37483e+06	1.67104e+06	1.70535e+06	1.46951e+06	1.57767e+06	1.64003e+06	1.50945e+06	1.61113e+06	1.47212e+06	1.79529e+06	1.59436e+06	1.48245e+06	1.50949e+06	1.15691e+06	2.08083e+06
Com_8809_pos	L-Palmitoylcarnitine	C23 H45 N O4	399.335	14.648	400.342	No results	No results	Full match	1.48518e+06	1.69737e+06	2.18354e+06	1.99812e+06	4.01726e+06	1.18e+06	1.17759e+06	5.20707e+06	1.52085e+06	1.56393e+06	4.53967e+06	1.82572e+06	3.98174e+06	3.95089e+06	2.60575e+06	1.39935e+06	1.46711e+06	2.17726e+06	1.46911e+06	7.50125e+06	2.83592e+06	1.99535e+06	1.03018e+06	2.17495e+06	2.2618e+06	2.43062e+06	1.86786e+06	1.9531e+06	1.93785e+06	1.80422e+06	2.37534e+06	1.70317e+06	2.37568e+06	3.21543e+06	1.56969e+06	1.21021e+06	1.75945e+06	4.48495e+06	1.67423e+06	1.39422e+06	3.78491e+06
Com_8895_pos	PC (18:1/19:2)	C45 H84 N O8 P	390.28	15.476	798.593	No results	Invalid mass	No results	1.93176e+06	2.28128e+06	2.25368e+06	920250	577285	1.33087e+06	970640	3.95199e+06	2.1472e+06	8.43566e+06	1.02385e+06	1.46113e+06	2.21336e+06	1.56699e+06	1.81389e+06	834649	835168	965267	1.81933e+06	1.89972e+06	939057	2.78352e+06	1.03859e+06	1.55484e+06	2.59244e+06	2.45368e+06	2.15502e+06	1.18761e+06	1.93061e+06	1.57843e+06	2.50947e+06	1.76439e+06	1.73164e+06	1.00142e+06	1.88823e+06	1.15181e+06	676303	1.67713e+06	1.64214e+06	1.58854e+06	1.23494e+06
Com_8910_pos	PC (17:2/22:6)	C47 H78 N O8 P	815.539	14.537	816.547	No results	Invalid mass	No results	166282	190125	334248	255359	132200	118816	179801	162287	138989	708089	193332	281847	192228	159498	148222	126297	153617	187390	340094	229583	196580	159484	100954	174373	171686	358611	251489	222907	422050	259631	190180	190984	201867	257304	184774	401247	123226	293057	167505	534471	136351
Com_892_pos	PC (17:2/17:2)	C42 H76 N O8 P	753.532	15.427	754.539	No results	Full match	No results	2.2889e+08	2.27712e+08	2.29776e+08	2.03197e+08	1.97877e+08	227795797	3.02136e+08	2.66795e+08	2.16205e+08	2.89798e+08	1.95236e+08	1.9304e+08	1.9256e+08	1.95195e+08	153734307	1.26691e+08	8.46825e+07	2.2612e+08	6.94206e+07	1.66583e+08	1.93479e+08	1.70673e+08	1.06948e+08	2.86829e+08	1.60997e+08	2.00724e+08	1.94036e+08	1.9335e+08	1.1502e+08	240507302	2.20845e+08	2.36532e+08	1.83358e+08	171464436	1.77034e+08	7.33719e+07	1.65471e+08	1.57152e+08	2.31396e+08	7.61186e+07	1.44819e+08
Com_8957_pos	1-(2,6-Dichlorophenyl)-2-indolinone	C14 H9 Cl2 N O	277.002	1.355	278.009	Invalid mass	No results	No results	2.57549e+06	6.70116e+06	6.96027e+06	2.62514e+06	1.08112e+06	2.44564e+06	2.31192e+06	3.23672e+06	3.49129e+06	2.47187e+06	2.74413e+06	5.20595e+06	2.37939e+06	5.2158e+06	4.82275e+06	2.36681e+06	6.78017e+06	5.92196e+06	4.05659e+06	3.45974e+06	6.38225e+06	2.81294e+06	968491	1.0165e+06	5.79622e+06	3.36475e+06	2.34859e+06	1.94889e+06	2.14992e+06	1.95486e+06	3.39114e+06	2.78293e+06	4.05496e+06	1.09153e+06	1.93535e+06	1.28274e+06	2.29321e+06	3.29522e+06	8.51802e+06	4.9709e+06	2.10296e+06
Com_895_pos	L-Lysine	C6 H14 N2 O2	146.106	1.199	147.113	Full match	No results	Full match	1.8039e+08	1.29327e+08	1.46361e+08	1.97396e+08	1.15205e+08	1.06949e+08	1.41143e+08	1.75536e+08	1.67133e+08	1.64097e+08	2.13989e+08	1.77572e+08	2.92987e+08	2.19339e+08	1.60043e+08	1.06991e+08	111777789	1.93417e+08	1.64052e+08	1.78515e+08	1.53074e+08	1.3889e+08	243510202	1.65502e+08	1.32846e+08	1.31474e+08	1.87282e+08	1.64576e+08	1.90233e+08	1.96099e+08	179058834	190801711	1.51022e+08	1.36148e+08	208452169	1.04469e+08	1.04733e+08	1.42263e+08	1.48469e+08	1.36597e+08	1.2488e+08
Com_8969_pos	5-hydroxy-4-methoxy-5,6-dihydro-2H-pyran-2-one	C6 H8 O4	144.04	1.243	145.047	Invalid mass	No results	No results	7.21564e+06	6.40364e+06	5.41332e+06	5.45175e+06	3.7418e+06	4.09781e+06	4.69442e+06	4.58279e+06	4.32563e+06	5.81076e+06	5.59605e+06	7.54964e+06	6.88846e+06	5.34554e+06	5.28167e+06	4.32926e+06	3.74362e+06	4.29695e+06	4.27056e+06	4.88276e+06	5.87553e+06	5.09693e+06	3.47089e+06	3.89559e+06	3.87372e+06	4.25729e+06	7.97191e+06	6.40963e+06	8.39906e+06	6.32039e+06	7.16181e+06	6.94502e+06	6.91441e+06	6.45915e+06	6.49529e+06	5.05861e+06	5.5276e+06	7.40772e+06	5.66637e+06	5.21426e+06	4.78075e+06
Com_8970_pos	N-(9-oxodecyl)acetamide	C12 H23 N O2	235.156	10.888	236.163	Invalid mass	No results	No results	1.24841e+06	940987	1.06396e+06	644473	826353	803449	724018	578403	821032	1.13143e+06	884116	1.20364e+06	1.03184e+06	751449	1.04391e+06	821974	820619	1.08155e+06	1.17074e+06	838941	821855	1.09549e+06	663804	702340	893224	1.12194e+06	891660	979926	982397	877482	902061	842331	892889	1.25608e+06	1.05999e+06	779779	962664	899788	956321	881127	885317
Com_898_pos	(3β,5ξ,9ξ)-3,6,19-Trihydroxyurs-12-en-28-oic acid	C30 H48 O5	488.349	14.945	489.356	Full match	No results	No results	2.03392e+08	2.35605e+08	322416142	2.55101e+08	8.58493e+07	7.34817e+07	9.74431e+07	223324830	2.35178e+08	1.6437e+08	2.98061e+08	2.12818e+08	3.1012e+08	3.85934e+08	1.27581e+08	1.92345e+08	251318844	2.01649e+08	2.36389e+08	1.59544e+08	2.31596e+08	3.30897e+08	168941310	3.24001e+08	252545542	3.3907e+08	3.06903e+08	2.28199e+08	1.68829e+08	2.1864e+08	2.35892e+08	2.09842e+08	387692538	277207118	279761764	1.32093e+08	2.7178e+08	1.64655e+08	317753086	1.42944e+08	1.24122e+08
Com_901_pos	INH	C16 H26 N6 O5	382.198	12.022	383.205	Full match	No results	No results	9.06076e+06	8.62187e+06	8.89907e+06	8.82945e+06	1.93111e+08	2.02257e+08	2.47114e+08	8.02754e+06	1.52845e+08	8.77728e+06	9.27451e+06	8.73057e+06	1.0296e+07	7.81437e+06	5.24627e+07	1.96151e+08	1.22188e+08	8.88146e+06	9.76017e+06	7.70471e+06	7.29638e+06	8.00698e+06	1.5757e+08	8.61201e+06	8.15183e+07	4.26024e+07	1.38491e+07	1.3527e+07	1.36581e+07	1.05953e+07	1.24572e+07	1.10823e+07	1.18825e+07	2.48335e+07	1.07312e+07	2.19042e+08	2.41816e+08	6.3784e+07	2.48473e+07	1.72821e+08	1.47292e+08
Com_916_pos	Corey Lactone Diol	C8 H12 O4	172.074	7.305	173.081	No results	No results	Full match	2.06809e+07	1.94785e+07	1.7792e+07	1.80993e+07	1.69642e+08	1.5725e+08	2.32135e+08	1.62899e+07	1.12497e+08	1.75092e+07	1.8212e+07	2.02007e+07	2.12281e+07	1.64241e+07	4.50318e+07	1.89915e+08	9.72648e+07	1.77718e+07	1.93869e+07	1.6572e+07	1.61963e+07	1.6367e+07	1.33331e+08	1.91849e+07	5.98715e+07	3.86238e+07	2.47702e+07	2.35594e+07	2.46411e+07	2.02574e+07	2.0876e+07	2.21514e+07	2.33024e+07	5.09884e+07	2.11581e+07	1.95042e+08	1.86867e+08	1.00666e+08	4.31267e+07	1.42256e+08	207600806
Com_9182_pos	PC (19:1/19:1)	C46 H88 N O8 P	813.619	14.295	814.628	No results	Invalid mass	No results	2.44339e+06	3.74792e+06	3.8917e+06	3.9419e+06	3.62398e+06	1.45655e+06	2.54972e+06	3.96242e+06	3.39093e+06	2.20374e+06	5.17472e+06	3.38759e+06	3.66974e+06	3.03514e+06	2.41267e+06	1.93645e+06	2.01372e+06	5.20122e+06	5.07704e+06	3.8148e+06	1.82251e+06	4.53721e+06	2.1862e+06	2.80446e+06	3.02577e+06	3.89044e+06	5.7739e+06	5.65319e+06	6.29011e+06	3.63621e+06	3.46747e+06	5.24925e+06	1.39531e+06	8.19523e+06	7.035e+06	2.14737e+06	2.10585e+06	2.58715e+06	3.8294e+06	1.95523e+06	3.61311e+06
Com_9191_pos	Lysopa 16:0	C19 H39 O7 P	410.243	14.357	411.25	No results	No results	Full match	5.97845e+06	5.50526e+06	4.33553e+06	6.33742e+06	2.15904e+06	1.17143e+06	1.63911e+06	4.89296e+06	4.29531e+06	4.62629e+06	3.49336e+06	4.11786e+06	6.24394e+06	7.26897e+06	2.10926e+06	3.3519e+06	6.09331e+06	4.99497e+06	5.0367e+06	3.16542e+06	4.99611e+06	5.65656e+06	3.40634e+06	6.98776e+06	7.22618e+06	6.77989e+06	5.74828e+06	5.97763e+06	2.31147e+06	4.91953e+06	3.74951e+06	3.73754e+06	4.04892e+06	3.14901e+06	4.45009e+06	1.8736e+06	5.13877e+06	3.58033e+06	7.86814e+06	2.23334e+06	2.21711e+06
Com_9233_pos	PC (19:1/20:5)	C47 H82 N O8 P	819.59	13.52	820.598	No results	Invalid mass	No results	304208	279254	293843	312322	220842	232354	228731	296084	275235	325007	294116	297378	1.5103e+06	292001	278513	240969	275465	278864	314417	6.73859e+06	267230	257071	214655	271411	313956	241441	483209	518966	492037	428746	406238	411495	425796	409592	401855	247274	266918	375028	337404	278433	270402
Com_92_pos	PC (17:0/17:1)	C42 H82 N O8 P	759.578	15.865	760.586	No results	Full match	No results	2006370228	2234343805	2641682122	2276589327	1472442737	1324767930	1916717214	3217773827	1197563862	3237471006	2548694669	2366786721	1488412227	1721807306	2006975558	1066678322	1819538543	2052948797	2928846861	2104226401	2544703838	2086264935	1199027484	2379582547	2158254416	2770666212	9876507780	4527733174	1880160513	1775915905	3583097006	1833174846	2798018986	3120525823	2502375199	297966188	9.15585e+08	2592928421	1385650532	6.36442e+07	1187533522
Com_9359_pos	17alpha-Hydroxyprogesterone	C21 H30 O3	330.216	9.234	331.224	Invalid mass	No results	No results	179031	164767	232167	164252	4.10996e+06	2.54128e+06	3.97679e+06	152463	1.89392e+06	172993	160571	162887	176261	165275	296314	2.59405e+06	1.68568e+06	250543	316837	144483	150048	146689	545646	185741	636790	147663	213323	227377	257160	179909	194624	190862	203301	302523	193338	2.9037e+06	2.5627e+06	989481	577020	2.14802e+06	1.99196e+06
Com_93_pos	2-[5-(2-hydroxypropyl)oxolan-2-yl]propanoic acid	C10 H18 O4	224.103	10.902	225.11	Invalid mass	No results	No results	5.26476e+07	3.56588e+07	3.40115e+07	3.34484e+07	6.6462e+08	6.81987e+08	1890829520	3.29537e+07	9.41444e+08	3.75682e+07	3.95086e+07	3.59428e+07	3.8538e+07	3.33804e+07	3.9105e+08	5.1775e+08	3.90886e+08	3.99771e+07	4.14738e+07	31322643	3.74479e+07	3.36711e+07	5408231589	4.23249e+07	9.98579e+07	2.82684e+08	3.67635e+07	3.79567e+07	3.71038e+07	3.13599e+07	3.44908e+07	3.60094e+07	3.5501e+07	1.52665e+08	3.33587e+07	1328907168	5.42574e+08	3.23933e+08	9.28497e+07	5.26418e+08	6.49109e+08
Com_9420_pos	Levothyroxine	C15 H11 I4 N O4	776.688	11.742	777.696	Full match	Full match	Full match	4.52444e+06	6.13098e+06	5.13523e+06	3.51828e+06	2.65033e+06	4.84154e+06	3.81557e+06	4.73849e+06	4.03586e+06	3.75883e+06	4.96992e+06	2.39567e+06	3.91924e+06	5.61519e+06	4.27286e+06	3.21941e+06	5.08161e+06	7.12945e+06	4.04521e+06	4.19298e+06	2.92648e+06	6.18376e+06	2.30613e+06	6.51477e+06	5.93041e+06	3.89595e+06	3.8062e+06	6.40175e+06	8.1962e+06	2.69062e+06	4.63419e+06	5.55913e+06	3.56969e+06	4.93943e+06	3.19177e+06	3.01366e+06	4.03089e+06	5.65693e+06	3.81651e+06	3.32126e+06	3.01876e+06
Com_9492_pos	PC (14:0e/22:3)	C44 H84 N O7 P	769.6	16.444	770.607	No results	Full match	No results	2.9956e+06	2.94604e+06	3.21586e+06	2.62375e+06	3.37295e+06	3.11624e+06	2.99031e+06	4.13788e+06	2.96435e+06	4.60486e+06	4.30819e+06	5.40791e+06	4.35978e+06	4.91498e+06	3.21504e+06	2.09714e+06	3.88694e+06	4.65686e+06	4.35667e+06	3.29542e+06	3.96731e+06	3.94016e+06	3.34187e+06	6.00216e+06	4.89816e+06	5.00605e+06	6.07998e+06	6.16462e+06	5.18953e+06	3.70183e+06	6.39169e+06	7.56812e+06	5.08406e+06	4.4797e+06	6.41033e+06	3.99816e+06	1.98826e+06	4.80784e+06	2.28925e+06	4.1129e+06	2.60136e+06
Com_9594_pos	DL-o-Tyrosine	C9 H11 N O3	181.074	16.979	182.082	No results	No results	Full match	1.10246e+06	1.3162e+06	926218	965049	1.06203e+06	760753	946801	1.50245e+06	919724	1.48525e+06	1.25315e+06	1.51325e+06	1.21879e+06	1.18386e+06	1.09404e+06	792652	1.15774e+06	1.35398e+06	1.28519e+06	1.18954e+06	1.15331e+06	1.09528e+06	749197	1.2992e+06	1.37743e+06	1.05625e+06	1.59714e+06	1.33344e+06	1.93174e+06	1.36324e+06	1.55311e+06	1.34414e+06	1.06805e+06	1.37497e+06	1.43282e+06	1.13798e+06	843500	1.17317e+06	1.11874e+06	1.09011e+06	1.06508e+06
Com_9681_pos	PC (18:1e/21:0)	C47 H94 N O7 P	815.693	16.376	816.701	No results	Invalid mass	No results	4.01428e+06	3.35325e+06	3.87476e+06	3.68916e+06	3.51535e+06	2.94714e+06	2.52955e+06	3.16117e+06	2.95297e+06	4.62393e+06	4.64722e+06	4.64007e+06	5.45097e+06	4.12488e+06	3.35142e+06	2.48903e+06	3.30844e+06	4.24678e+06	4.97457e+06	4.11763e+06	3.48067e+06	4.13746e+06	2.46283e+06	3.65974e+06	5.10571e+06	4.17096e+06	1.77152e+06	3.1642e+06	7.08885e+06	5.29475e+06	5.14968e+06	6.12385e+06	5.46646e+06	6.07588e+06	5.6688e+06	3.61749e+06	4.99835e+06	4.57988e+06	5.14213e+06	4.38025e+06	3.56361e+06
Com_975_pos	PC (20:3e/16:0)	C44 H84 N O7 P	769.599	16.225	770.606	No results	Full match	No results	1.98669e+08	2.04416e+08	2.34886e+08	1.74385e+08	1.39644e+08	1.88215e+08	1.82535e+08	2.34954e+08	1.83484e+08	2.39026e+08	2.4081e+08	2.48462e+08	1.86196e+08	2.45413e+08	2.65128e+08	2.10149e+08	2.89149e+08	2.23448e+08	2.1525e+08	1.79905e+08	2.07447e+08	2.40384e+08	2.13232e+08	3.68819e+08	2.44508e+08	2.57624e+08	2.53339e+08	2.88112e+08	2.44969e+08	1.99991e+08	3.19308e+08	347482949	2.77751e+08	2.32742e+08	3.07005e+08	1.50055e+08	1.30064e+08	2.54307e+08	1.71822e+08	1.60186e+08	1.22935e+08
Com_98_pos	Lysopc 18:3	C26 H48 N O7 P	517.315	14.999	518.323	No results	No results	Full match	3193174621	4796382482	2238643079	4403522752	1966911020	2097402555	1884279604	2710896903	3895933777	3192060239	4212598271	3928041524	2753582008	3210096287	3335003839	2958406413	2366453169	5007873455	2255152683	7649492036	5107914288	6079787049	2.03004e+08	3653155786	2473938796	2664107907	3103859704	3298700910	3238226995	3447059658	2645173387	6755287000	2419456337	3111032006	2779272453	2018461441	3679386287	2357371719	2173457121	1600389280	1476237049
Com_9945_pos	PC (17:0/18:3)	C43 H80 N O8 P	769.558	14.212	770.566	No results	Invalid mass	No results	2.14745e+06	3.46454e+06	3.33223e+06	2.93294e+06	1.38931e+06	1.9543e+06	3.46997e+06	4.37519e+06	2.40685e+06	3.90533e+06	3.8575e+06	3.93221e+06	1.98002e+06	3.40975e+06	2.89779e+06	1.57244e+06	3.26089e+06	2.17455e+06	3.15336e+06	2.65698e+06	3.51807e+06	2.99238e+06	1.23809e+06	3.3576e+06	1.60811e+06	3.28446e+06	2.58391e+06	2.21892e+06	2.50141e+06	1.53263e+06	4.84741e+06	3.52563e+06	3.57582e+06	3.18262e+06	3.51711e+06	4.48035e+06	1.47055e+06	3.14369e+06	1.85985e+06	1.8039e+06	1.90338e+06
Com_9951_pos	PC (17:0/18:1)	C43 H84 N O8 P	773.595	14.57	774.603	No results	Full match	No results	1.57114e+06	1.73418e+06	3.02155e+06	2.60004e+06	1.52139e+06	1.22157e+06	2.48811e+06	2.45159e+06	2.85215e+06	2.12024e+06	2.52376e+06	2.71931e+06	3.32845e+06	1.84538e+06	2.6879e+06	1.87552e+06	1.67422e+06	1.75498e+06	1.80936e+06	3.31587e+06	1.61065e+06	2.27626e+06	951494	1.58925e+06	4.37936e+06	3.05383e+06	2.92837e+06	3.65091e+06	3.20448e+06	2.47405e+06	3.44265e+06	5.61166e+06	2.00966e+06	2.98869e+06	1.75841e+06	2.79801e+06	1.02228e+06	1.7929e+06	2.3761e+06	5.54994e+06	2.247e+06
Com_995_pos	9-Oxo-ODE	C18 H30 O3	294.22	13.004	295.227	Full match	No results	Full match	1.48303e+07	1.61804e+07	1.30416e+07	1.30806e+07	1.36602e+07	1.36489e+07	1.54503e+07	1.29363e+07	1.0007e+07	1.3555e+07	13400677	1.37186e+07	1.32676e+07	3.02537e+07	1.77705e+07	3.05092e+07	1.5761e+07	4.45205e+07	2.71155e+07	2.64794e+07	4.74788e+07	3.39548e+07	2.07069e+08	1.55227e+07	13967101	1.06319e+07	1.46876e+07	1.58581e+07	1.64792e+07	1.34789e+07	1.36147e+07	1.45114e+07	1.41288e+07	1.27665e+07	2.43292e+07	1.45203e+07	1.54421e+07	1.5082e+07	1.33879e+07	1.75299e+07	1.81755e+07
Com_99_pos	Gly-Phe	C11 H14 N2 O3	222.101	6.501	223.108	No results	No results	Full match	3870795576	2878554615	3292303991	3204408067	2140453018	1744816653	1552210783	3280398471	4402648245	2920924723	2791577250	3116388051	1807750942	3472516046	2748323741	2313277332	2795472403	4853283759	3626233360	1601231890	2389458247	2415592908	5047575939	4147562936	2394402132	2639826677	2081165268	2573712444	1619926831	1387172627	2448703796	2683044105	2157475846	2960084308	2664305602	1501985430	1346434121	2489099532	2497269918	2557825665	2289374811
Com_9_pos	Oleoyl ethylamide	C20 H39 N O	309.304	15.317	310.311	Full match	No results	No results	6.83593e+08	5.32545e+08	5.1681e+08	4.93547e+08	5.59365e+08	3.36392e+08	3.14074e+08	4.20652e+08	360985381	5.84727e+08	4.74049e+08	485496535	7.27606e+08	4.57067e+08	479219056	2.87153e+08	4.41032e+08	4.49834e+08	4.51839e+08	441749564	5.23809e+08	4.75073e+08	3.03742e+08	5.91133e+08	6.27865e+08	3.95289e+08	7.50911e+08	6.54146e+08	8.34339e+08	306836187	4.32594e+08	5.20918e+08	8.14354e+08	6.826e+08	808542302	300522000	3.73032e+08	5.43327e+08	7.55803e+08	4.93032e+08	4.94486e+08
[truncated: 20 more columns]

## Sheet: TAI vs. HC_neg
Compound_ID	Name	Formula	Molecular Weight	RT [min]	m/z	mzCloud_Results	mzVault_Results	MassList_Results	neg_TAI_1	neg_TAI_2	neg_TAI_3	neg_TAI_4	neg_TAI_5	neg_TAI_6	neg_TAI_7	neg_TAI_8	neg_TAI_9	neg_TAI_10	neg_TAI_11	neg_TAI_12	neg_TAI_13	neg_TAI_14	neg_TAI_15	neg_TAI_16	neg_TAI_17	neg_TAI_18	neg_TAI_19	neg_TAI_20	neg_TAI_21	neg_TAI_22	neg_TAI_23	neg_TAI_24	neg_TAI_25	neg_TAI_26	neg_HC_1	neg_HC_2	neg_HC_3	neg_HC_4	neg_HC_5	neg_HC_6	neg_HC_7	neg_HC_8	neg_HC_9	neg_HC_10	neg_HC_11	neg_HC_12	neg_HC_13	neg_HC_14	neg_HC_15
Com_1000_neg	FAHFA (18:0/20:2)	C38 H70 O4	590.526	14.673	589.519	No results	Full match	No results	7.49173e+06	2.67303e+06	6.43679e+06	5.54891e+06	6.88115e+06	2.64521e+06	5.15384e+06	1.06544e+08	3.77125e+06	7.41879e+06	3.42961e+06	4.72688e+06	7.79004e+06	4.56675e+06	7.68563e+06	3.7193e+06	4.11491e+06	7.36156e+06	3.93327e+06	7.09854e+06	5.94362e+06	7.27991e+06	2.29806e+07	7.51952e+06	8.18478e+06	6.72509e+06	7.91631e+06	8.73663e+06	2.349e+06	5.10483e+06	5.72482e+06	6.94007e+06	9.99986e+06	5.83543e+06	3.94132e+06	6.99886e+06	3.67731e+06	9.27639e+06	6.31668e+06	4.69822e+06	5.88849e+06
Com_10016_neg	2-Methoxyestradiol	C19 H26 O3	302.188	10.932	301.18	Full match	No results	Full match	623545	913961	649249	957329	1.48449e+06	746667	1.49151e+06	813380	1.08407e+06	1.18045e+06	436274	542555	666146	664533	767503	705493	1.27427e+06	923501	929687	707790	598238	608406	212394	1.07774e+06	1.25457e+06	906171	315201	662506	2.06817e+06	539487	571294	643772	873240	2.02253e+06	1.08402e+06	602867	477906	566011	585435	1.25052e+06	1.02907e+06
Com_10053_neg	13,14-dihydro-15-keto-tetranor Prostaglandin E2	C16 H26 O5	298.178	8.095	297.171	Full match	No results	No results	72183.5	118952	123029	146235	688728	577673	1.17714e+06	82202.7	166726	103271	105026	135411	112949	91106.6	407895	743800	257683	113034	109564	77834.4	78157.7	79604.1	92922.3	134592	94621.2	97758.9	149510	130738	147326	108519	120986	111602	123680	230932	199490	1.15293e+06	672964	245793	147156	618165	827177
Com_10100_neg	N epsilon,N epsilon,N epsilon-trimethyllysine	C9 H20 N2 O2	188.153	5.703	187.146	No results	No results	Full match	14946	21316.5	22901.9	27259.6	177130	217107	389795	17493.2	125776	25913.7	25423.9	27300.7	23402.7	19989.5	70182.6	26008.7	110603	24386.7	27497.3	17226.7	19821.7	24066.1	1.09049e+06	24822.5	30877.1	68224.6	29251.5	33663.7	36477.2	21988.7	26546.7	27174.2	25840.1	54411.8	41728.8	314653	176628	59024.1	25577.4	67512.8	105682
Com_10105_neg	N1-(4-cyclohexylphenyl)-2-[(4-methylphenyl)thio]acetamide	C21 H25 N O S	385.177	8.692	384.17	Invalid mass	No results	No results	46144.7	69837.5	72408.6	83591.1	719576	546718	847812	57190	550226	78278.7	82331.2	86033.9	75774.4	66135.4	103141	1.00246e+06	333255	79158.7	85720.4	56293.4	60541.9	76157	1.08892e+06	80746.2	248301	110828	99417.9	95684	118359	72377.4	88425.6	88352.4	83554.4	132057	99958.1	697727	638182	290466	90718.1	641044	589491
Com_1012_neg	1-[6-(benzyloxy)-3-(tert-butyl)-2-hydroxyphenyl]ethan-1-one	C19 H22 O3	298.16	13.165	297.153	Invalid mass	No results	No results	1.25606e+07	3.21806e+07	3.50918e+07	2.74174e+07	1.96578e+07	2.68489e+07	3.78504e+07	3.13907e+07	2.12686e+07	3.70292e+07	2.31731e+07	2.93421e+07	3.20657e+07	2.80744e+07	2.2021e+07	6.69791e+07	3.7743e+07	6.18935e+07	4.90946e+07	3.59056e+07	3.51902e+07	5.68412e+07	2.62565e+07	3.7264e+07	2.76476e+07	1.50771e+07	3.66293e+07	3.01562e+07	3.99278e+07	1.20817e+08	3.23526e+07	5.57017e+07	3.47289e+07	3.09521e+07	3.36457e+07	3.6668e+07	2.03559e+07	2.52977e+07	2.57112e+07	5.86422e+07	3.49833e+07
Com_10150_neg	4-(octyloxy)benzoic acid	C15 H22 O3	250.157	11.88	249.15	Full match	No results	No results	277281	679251	763822	2.20867e+06	305552	371205	483341	630934	363930	715621	646429	447842	400415	534155	463446	515871	350213	815820	788038	598617	947242	770946	303695	380736	316289	266531	1.01737e+06	847817	514627	738714	411423	550191	475438	420107	521284	426593	334826	328847	321629	316391	303981
Com_10187_neg	PG (18:2/18:2)	C42 H75 O10 P	724.5	16.482	723.493	No results	Invalid mass	No results	851777	1.53001e+06	1.58783e+06	1.34419e+06	1.21065e+06	1.15348e+06	1.67159e+06	850598	1.12262e+06	1.48338e+06	868690	1.3773e+06	1.45135e+06	1.41178e+06	1.22954e+06	698557	1.11575e+06	1.41787e+06	2.36603e+06	848928	1.19592e+06	275097	628151	1.31643e+06	1.82381e+06	1.10349e+06	371746	924981	714406	361682	724878	1.35872e+06	800348	1.43947e+06	1.68927e+06	1.08728e+06	1.102e+06	1.07282e+06	1.302e+06	1.771e+06	1.2635e+06
Com_102_neg	Lysopc 17:0	C25 H52 N O7 P	509.348	15.245	508.341	No results	No results	Full match	4.74116e+08	8.13755e+08	6.61205e+08	1.2624e+09	5.13933e+08	4.89866e+08	6.21531e+08	5.43733e+08	3.0464e+08	5.10816e+08	8.10542e+08	7.76127e+08	4.66021e+08	8.07452e+08	8.95249e+08	1.01813e+09	6.42263e+08	9.88026e+08	7.19313e+08	1.0706e+09	9.80268e+08	1.52883e+09	3.02451e+08	4.27675e+08	4.02895e+08	1.05337e+09	8.85631e+08	1.03059e+09	7.1286e+08	9.10666e+08	4.91913e+08	1.17522e+09	4.66051e+08	5.29281e+08	7.52906e+08	6.81506e+08	7.45692e+08	3.39512e+08	4.29493e+08	5.99488e+08	6.4227e+08
Com_1030_neg	Mevalonic acid	C6 H12 O4	148.074	2.043	147.067	No results	No results	Full match	497421	617370	609909	906172	1.13065e+06	980320	2.2573e+06	430392	1.92294e+06	743903	861710	699303	702920	694327	1.24417e+06	1.35155e+06	808308	1.4151e+06	834140	530159	668212	688442	7.15908e+07	885167	772137	1.62718e+06	1.03597e+06	838313	1.12233e+06	871529	721496	947752	846948	1.22372e+06	1.13006e+06	1.13988e+06	1.05828e+06	1.02928e+06	749389	1.22163e+06	1.26709e+06
Com_1040_neg	Calcitriol	C27 H44 O3	416.329	14.001	415.322	Full match	No results	No results	4.14522e+07	9.81643e+07	5.62918e+07	6.28391e+07	3.82051e+07	1.34722e+07	4.98799e+07	4.93629e+07	2.78108e+07	8.37218e+07	4.02547e+07	9.41349e+07	1.35983e+08	7.08209e+07	4.56105e+07	6.51721e+07	5.52622e+07	5.24781e+07	3.41762e+07	3.39178e+07	3.80265e+07	6.16583e+07	1.65682e+07	4.34765e+07	8.91891e+07	6.6854e+07	6.46075e+07	3.49789e+07	2.95408e+07	5.94527e+07	5.60209e+07	5.27852e+07	4.96072e+07	4.39509e+07	6.35509e+07	6.09082e+07	5.87569e+07	5.70295e+07	6.22573e+07	6.18078e+07	4.51675e+07
Com_10577_neg	Oxaloacetate	C4 H4 O5	132.006	1.131	130.999	No results	No results	Full match	678185	999666	1.59228e+06	709556	487504	614159	848042	557427	602541	677548	584258	509566	273540	895438	521430	999661	667249	1.42741e+06	707352	736874	871115	912120	220562	498151	385889	577410	1.12972e+06	1.09663e+06	1.08641e+06	605106	550777	966054	521785	1.06471e+06	941263	1.80453e+06	451691	483780	510326	793915	610944
Com_105_neg	Pentadecanoic acid	C15 H30 O2	242.225	14.054	241.218	Full match	No results	Full match	4.9872e+08	2.86876e+08	5.84793e+08	6.8922e+08	6.61297e+08	5.73388e+08	6.68776e+08	5.6608e+08	6.15614e+08	5.51142e+08	6.80419e+08	6.39729e+08	3.59934e+08	4.20012e+08	5.42841e+08	4.68952e+08	2.05989e+08	7.43382e+08	5.75327e+08	6.41662e+08	3.85046e+08	6.1833e+08	9.74926e+08	5.23039e+08	3.42954e+08	5.64756e+08	5.78186e+08	5.96574e+08	5.87801e+08	4.20909e+08	4.51949e+08	6.77812e+08	7.50069e+08	5.03429e+08	5.03056e+08	5.08855e+08	5.22728e+08	5.64228e+08	2.80698e+08	5.95718e+08	6.52778e+08
Com_10649_neg	5-Hydroxytryptophol	C10 H11 N O2	177.079	7.423	176.072	No results	No results	Full match	173372	1.62029e+06	175997	472228	207511	238464	231852	336400	428080	473242	563163	496276	214382	168819	329850	211627	453374	172706	183838	313891	630134	443441	115525	364910	310957	312308	585646	450325	516053	240301	342761	328205	305556	714226	386103	321326	439348	359634	331910	355915	303372
Com_106_neg	Testosterone sulfate	C19 H28 O5 S	368.166	11.195	367.158	Full match	Full match	No results	2.28164e+08	3.60636e+08	4.57799e+08	8.07678e+08	4.33632e+08	1.30046e+08	3.57574e+08	5.00833e+08	4.6686e+08	8.13361e+08	7.97698e+08	7.70218e+08	1.85273e+09	5.45087e+08	7.14743e+08	5.96753e+08	6.28399e+08	7.71821e+08	6.96833e+08	5.956e+08	5.74635e+08	1.5946e+08	2.78168e+08	6.73109e+08	7.05395e+08	5.94069e+08	8.59766e+08	1.0024e+09	5.81272e+08	7.86928e+08	2.50522e+08	4.58402e+08	9.12278e+08	9.37884e+08	4.59621e+08	7.00188e+08	1.5323e+08	6.63214e+08	5.54706e+08	1.27569e+09	1.807e+08
Com_1076_neg	FAHFA (17:0/18:0)	C35 H68 O4	552.512	14.424	551.505	No results	Full match	No results	7.62801e+07	3.85376e+07	9.2009e+06	1.3966e+07	1.36333e+07	9.73229e+06	9.65039e+06	1.74355e+07	4.53688e+06	7.35778e+06	3.31285e+07	2.30792e+07	2.43413e+07	1.65389e+07	1.4156e+07	5.82772e+06	2.48736e+06	5.65218e+06	1.86566e+06	1.21823e+07	2.64926e+07	8.05093e+06	1.68343e+07	1.1121e+07	8.50955e+06	7.47282e+06	1.65049e+07	2.57022e+07	1.46322e+07	5.13476e+07	4.66214e+07	3.00183e+07	4.47235e+07	3.12115e+07	2.47154e+07	2.97489e+07	6.05612e+07	5.42536e+07	6.81777e+07	1.21757e+07	2.76153e+07
Com_10836_neg	(3beta,9xi)-3-(beta-D-Glucopyranosyloxy)-14-hydroxycard-20(22)-enolide	C29 H44 O9	582.305	11.992	581.298	Invalid mass	No results	No results	102205	197116	221147	353956	165199	153383	201841	293144	173694	159754	166245	173850	158525	142181	143352	178925	161748	230490	180583	116565	130095	404429	89818.2	168634	172061	135222	219265	215198	258796	159556	264041	193488	186861	202401	203117	199675	153577	154542	167000	239791	163345
Com_10857_neg	Sodium cholate	C24 H39 Na O5	430.27	12.364	429.263	No results	No results	Full match	113968	189141	440664	205195	190311	202688	229801	144721	215837	198242	199681	217355	183371	160266	349034	248173	224222	362991	204435	307259	206824	226694	603182	206262	219094	175598	276942	273755	366536	218716	256184	280024	242258	477272	261393	382142	204838	184330	197425	294482	208392
Com_10953_neg	N-(2-morpholinophenyl)-2,1,3-benzoxadiazole-4-sulfonamide	C16 H16 N4 O4 S	360.088	8.715	359.081	Full match	No results	No results	346455	779492	726939	1.26876e+06	874441	438253	928560	365951	873966	738324	495673	309260	491800	1.01681e+06	1.29224e+06	1.12107e+06	1.64706e+06	178294	395982	421202	1.0601e+06	293636	359452	548676	1.19764e+06	973218	883962	935954	653329	733851	853970	1.43619e+06	558195	670873	1.54995e+06	1.13552e+06	621315	677620	966979	181915	583857
Com_11009_neg	23-Norcholic acid	C23 H38 O5	394.273	11.603	393.266	No results	No results	Full match	196598	333817	478080	386926	382856	222560	534517	201246	523648	235313	467885	543459	259426	775653	324683	322058	260875	152208	191286	304160	247124	345530	180847	1.72629e+06	612450	333452	263056	281343	607400	313746	170639	355354	205856	456242	205996	333742	798391	316844	214521	475635	200815
Com_11029_neg	MGMG (18:2)	C27 H48 O9	516.33	11.967	515.323	No results	No results	Full match	76069.1	113372	107812	124690	960515	491122	866728	89249.5	547272	115866	124611	127390	113491	103737	103356	855660	168541	118817	134404	83100.2	94704.6	118967	66849.7	125511	127774	100642	146681	155011	192034	118754	141779	141767	139077	150667	148373	967963	354036	177512	128222	1.34236e+06	785929
Com_11062_neg	(+/-)-CP 47,497-C7-Hydroxy metabolite	C21 H34 O3	334.251	12.587	333.244	Full match	No results	No results	125966	521007	204834	252068	209633	210909	240063	167942	340708	214102	251407	347502	210538	318002	182354	475377	208125	198462	228949	154219	163131	207500	106557	230226	228060	175352	318536	297609	404862	241003	296739	285428	271122	518171	650169	261930	222946	297301	1.42455e+06	313022	244452
Com_11110_neg	PC (18:0e/18:2)	C44 H86 N O7 P	831.64	15.832	830.632	No results	Invalid mass	No results	820424	545256	856423	369942	409809	677371	1.1435e+06	557390	996537	854693	990466	1.32212e+06	811039	223297	750572	995563	1.05774e+06	873246	1.10388e+06	394137	530380	795116	384714	1.41685e+06	1.76556e+06	677725	1.17328e+06	834480	1.21939e+06	580276	561366	1.19753e+06	1.38694e+06	710670	665724	1.3892e+06	510513	417431	1.24014e+06	564359	599350
Com_1113_neg	Nervonic acid	C24 H46 O2	366.35	15.405	365.343	Full match	No results	Full match	6.38545e+07	6.30705e+07	4.31398e+07	8.53108e+07	6.55299e+07	9.39228e+07	6.63078e+07	9.24445e+07	3.98102e+07	6.93314e+07	5.4669e+07	8.90158e+07	7.08725e+07	5.90558e+07	6.70691e+07	7.45111e+07	1.03423e+08	6.85118e+07	5.18437e+07	4.90129e+07	5.43649e+07	8.0221e+07	6.2651e+07	7.79319e+07	9.40243e+07	6.22427e+07	5.52464e+07	5.39583e+07	1.15515e+08	5.5792e+07	6.35194e+07	5.79156e+07	6.8248e+07	8.96999e+07	6.11345e+07	4.41011e+07	4.85207e+07	6.04904e+07	4.38568e+07	4.81514e+07	6.3774e+07
Com_11163_neg	13,14-dihydro Prostaglandin E1	C20 H36 O5	356.257	11.173	355.249	Full match	No results	No results	114398	179161	183936	219002	192220	176446	230322	156437	209553	206069	542622	226400	251514	171954	190302	231243	201414	200674	230332	149433	164433	877392	164238	232987	228215	181281	234513	243490	306509	196097	237411	220541	227150	262625	239090	231044	172306	188891	189396	279369	198121
Com_1120_neg	PE (18:1/22:6)	C45 H76 N O8 P	789.526	15.596	788.522	No results	Invalid mass	No results	3.0672e+07	3.44222e+07	2.91044e+07	3.88367e+07	4.36779e+07	8.09157e+07	3.65226e+07	3.19918e+07	3.44999e+07	2.63305e+07	2.88648e+07	2.43793e+07	2.77322e+07	3.16745e+07	4.79057e+07	2.92424e+07	7.00231e+07	6.8043e+07	2.4983e+07	3.86275e+07	2.78132e+07	4.68767e+07	1.24176e+07	5.02798e+07	1.44355e+08	1.99625e+07	2.59203e+07	2.00318e+07	8.74397e+07	2.14161e+07	5.99706e+07	4.52837e+07	3.061e+07	5.58943e+07	2.80666e+07	1.20525e+07	2.12638e+07	3.27396e+07	2.43009e+07	2.32864e+07	3.82791e+07
Com_11217_neg	2,3-Dinor-TXB2	C18 H30 O6	342.204	10.259	341.197	No results	No results	Full match	155226	219887	543301	528582	413105	414115	518124	159853	169870	246937	384286	118904	143296	1.26382e+06	155229	519522	309799	650661	526959	261667	647543	566997	144887	173741	139868	121832	738452	422373	213887	818904	116749	242658	139360	173789	363768	517621	556477	372329	176843	452082	509231
Com_1132_neg	Lignoceric Acid	C24 H48 O2	368.366	15.684	367.359	Full match	No results	No results	1.98747e+07	4.36586e+07	4.46012e+07	4.27298e+07	5.50052e+07	4.38999e+07	6.10965e+07	7.05798e+07	4.43802e+07	3.8784e+07	3.54341e+07	4.1133e+07	5.32468e+07	4.17577e+07	4.59826e+07	4.40199e+07	3.10477e+07	4.20488e+07	4.29972e+07	7.32438e+07	3.8275e+07	5.38409e+07	4.88215e+07	5.39807e+07	5.84609e+07	2.15047e+07	4.44496e+07	4.7641e+07	1.16055e+08	3.74555e+07	4.02234e+07	5.77407e+07	4.45043e+07	5.65136e+07	3.72146e+07	6.4092e+07	2.67216e+07	3.36955e+07	3.38103e+07	5.20747e+07	4.91554e+07
Com_1134_neg	Heptanoic acid	C7 H14 O2	130.1	9.667	129.092	Full match	No results	No results	1.09309e+07	1.7157e+07	1.76586e+07	1.99406e+07	5.11567e+07	4.50464e+07	5.83402e+07	1.39475e+07	3.8735e+07	1.85336e+07	2.05547e+07	2.09358e+07	1.84672e+07	1.63901e+07	2.64951e+07	5.7888e+07	3.37319e+07	2.05467e+07	2.14392e+07	1.44952e+07	1.57354e+07	2.01697e+07	6.31704e+07	1.97844e+07	2.57451e+07	2.05528e+07	1.95356e+07	1.70052e+07	2.25183e+07	1.46844e+07	1.75916e+07	1.74861e+07	1.75139e+07	2.07991e+07	1.9926e+07	5.44044e+07	3.32731e+07	2.06978e+07	1.8462e+07	3.7366e+07	3.07134e+07
Com_113_neg	(+/-)12(13)-DiHOME	C18 H34 O4	296.235	12.963	295.228	Invalid mass	No results	No match	3.12288e+07	1.62429e+07	1.56229e+07	1.85116e+07	1.32711e+07	1.39381e+07	5.6857e+06	1.61048e+07	1.41277e+07	1.44889e+07	2.34707e+07	2.08739e+07	1.59515e+07	1.66867e+07	1.5264e+07	1.6596e+07	1.19359e+07	1.45829e+07	1.49354e+07	3.88771e+07	2.71163e+07	2.21215e+07	9.09281e+08	1.83491e+07	6.81375e+06	2.01478e+07	1.57487e+07	9.91588e+06	1.40649e+07	2.46749e+07	1.5852e+07	1.44226e+07	1.52718e+07	1.51034e+07	1.20402e+07	2.25484e+07	2.1869e+07	1.72755e+07	1.57036e+07	2.25459e+07	1.85128e+07
Com_11524_neg	PA (18:1/18:2)	C39 H71 O8 P	698.487	15.059	697.48	No results	Full match	No results	545688	602622	807628	760295	862144	794847	1.21571e+06	850565	1.03072e+06	646792	1.00327e+06	1.33779e+06	678204	646912	1.2156e+06	1.01667e+06	1.01973e+06	1.18156e+06	1.13496e+06	621261	957792	1.02233e+06	458479	1.09538e+06	878717	887140	661872	472150	389165	420850	954310	575788	906993	845500	703399	713263	476152	705695	377796	984660	871684
Com_11631_neg	Naringenin	C15 H12 O5	272.069	8.838	271.062	Full match	No results	No results	45062.3	1.16235e+06	65993.4	79860.6	72114.5	71149.4	89969	54364.6	84125.2	76889.8	77216.7	80619.4	163871	63858.4	97562.1	81035.7	73661.4	76143	83871.4	53448.1	58548.7	75760	46206.8	83000.3	84405.5	65357.4	88235.2	623042	409380	73373.4	86737.1	85349.4	83454.3	95923.9	99311.1	89258.7	72436.9	71830.3	73307.1	93722.5	79006.5
Com_11632_neg	3-(1-cyano-1,2-dihydroisoquinolin-2-yl)-3-oxopropyl propionate	C16 H16 N2 O3	284.118	12.25	283.111	Invalid mass	No results	No results	689783	1.16156e+06	773657	675266	927131	776009	812660	437562	637353	670751	774230	540734	766462	492980	532688	738963	858758	560648	601769	460240	470542	515406	250333	621873	709375	580652	916178	1.08957e+06	1.25158e+06	585859	1.29055e+06	757081	657644	1.23585e+06	873889	939915	643698	885200	711250	1.15457e+06	650065
Com_11638_neg	2-[6-(1H-benzo[d]imidazol-2-yl)-2-pyridyl]-1H-benzo[d]imidazole	C19 H13 N5	357.125	9.904	356.118	Invalid mass	No results	No results	71380.6	173964	1.16325e+06	115407	117936	121203	146485	184484	115652	115039	123224	124908	101415	103638	104887	116769	121210	110413	363668	74276.1	94343.3	853788	58106.1	164178	122697	99446.4	482125	136083	193754	123070	131714	150090	124929	161452	129848	120506	109339	119466	248327	137877	115168
Com_1171_neg	L-Ornithine	C5 H12 N2 O2	132.09	1.478	131.083	No results	No results	Full match	1.18323e+07	2.92941e+07	3.04927e+07	4.29161e+07	3.51889e+07	2.96508e+07	4.14583e+07	2.83916e+07	3.75455e+07	3.43307e+07	3.93108e+07	3.2505e+07	3.12099e+07	3.8569e+07	4.09397e+07	3.20166e+07	2.44972e+07	3.14031e+07	3.89739e+07	2.02463e+07	3.43323e+07	4.0105e+07	5.98422e+07	4.12054e+07	2.50155e+07	2.91834e+07	3.07339e+07	2.8377e+07	3.78132e+07	2.40936e+07	2.64313e+07	3.52142e+07	3.03818e+07	3.27757e+07	3.52695e+07	2.16794e+07	2.41431e+07	2.5458e+07	2.48425e+07	2.83664e+07	3.32182e+07
Com_11745_neg	1-Methyluric acid	C6 H6 N4 O3	182.044	8.868	181.036	No results	No results	Full match	212685	190820	178667	305142	230004	382367	167281	137982	242639	269184	256084	243011	308352	165896	998703	235212	228647	204150	149512	198454	159163	211691	168391	235860	295500	473212	607781	238217	289985	178891	308386	235602	316542	261451	266328	194740	106779	250676	215289	221630	235743
Com_1193_neg	Hydrocinnamic acid	C9 H10 O2	150.068	7.648	149.061	Full match	No results	Full match	4.29363e+06	2.19869e+06	1.13124e+07	1.51632e+07	2.26901e+07	7.55994e+06	3.29872e+07	3.52342e+06	5.96797e+06	4.04628e+06	3.2885e+06	8.34344e+06	1.02493e+07	5.69771e+06	3.90047e+06	5.80718e+06	1.53609e+07	1.0196e+07	9.11093e+06	3.49226e+06	3.68283e+06	1.4201e+07	7.43572e+06	5.54997e+06	6.6611e+06	6.2794e+06	1.71321e+07	2.98123e+06	2.4344e+07	1.6723e+07	2.56445e+06	6.0869e+06	2.75858e+06	3.67874e+06	1.31529e+08	5.59245e+06	1.62323e+07	5.15493e+06	5.13139e+06	5.3766e+06	3.49548e+06
Com_11940_neg	Glycolithocholic acid	C26 H43 N O4	433.32	13.177	432.312	No results	No results	Full match	83125.6	129044	127740	195812	175815	128309	768794	105816	445879	137800	444895	168953	130991	201371	112285	142134	1.15698e+06	134699	145062	97877.5	109376	518244	79171.4	137836	148355	128001	189851	189642	320756	500909	182020	278599	169270	903833	1.27383e+06	165543	141713	137866	516217	184012	491203
Com_1206_neg	LPC 14:0	C22 H46 N O7 P	527.323	14.151	526.315	No results	Invalid mass	No results	4.76756e+06	5.82536e+07	5.35945e+06	2.99694e+07	7.49363e+07	4.53474e+07	6.60146e+06	1.22355e+07	1.09562e+08	4.16076e+06	2.0976e+07	5.17349e+07	4.05721e+06	3.85477e+06	6.56037e+06	7.2387e+07	3.45665e+07	1.03766e+07	1.00937e+07	4.98665e+07	3.47405e+07	754482	4.11355e+06	2.04208e+07	2.19188e+07	1.11402e+07	4.19887e+07	4.79785e+06	3.18788e+07	2.14615e+07	2.13189e+07	2.55004e+07	2.51342e+07	1.91722e+07	1.01689e+07	3.04868e+07	2.93539e+07	4.90003e+06	1.20346e+07	5.92794e+07	5.77173e+06
Com_120_neg	6-Keto-prostaglandin f1alpha	C20 H34 O6	370.235	10.93	369.228	No results	No results	Full match	1.40463e+06	2.65575e+06	804163	916147	1.01903e+09	7.37492e+08	9.73289e+08	557090	7.64668e+08	977236	2.21655e+06	894238	589098	476837	8.16501e+07	9.01214e+08	1.29839e+08	1.05429e+06	1.34806e+06	624073	1.27043e+06	1.62276e+06	2.90006e+08	1.031e+06	4.52712e+07	3.98261e+07	1.19637e+06	652899	792446	857419	573014	2.32866e+06	1.08736e+06	4.22246e+07	1.24731e+06	1.11923e+09	6.23738e+08	8.0488e+07	2.10674e+07	7.44742e+08	5.55255e+08
Com_12109_neg	N1-[4-(cyanomethyl)phenyl]-4-chlorobenzamide	C15 H11 Cl N2 O	270.053	9.063	269.045	Invalid mass	No results	No results	46495.7	75334.1	73706.2	88157.9	261472	243446	168059	59818.2	176791	78567.6	86543	89173.5	80112.1	67610.1	73656.8	317192	157447	82165.9	92301.7	142892	508213	79637.2	63349.5	88486.8	123067	70756.5	105940	105666	1.4502e+06	78183.2	94250.2	90460.4	90088.2	108105	121912	158685	230693	106063	90256	215972	204904
Com_1222_neg	Catechol	C6 H6 O2	110.037	4.164	109.03	Full match	No results	Full match	2.78843e+06	1.10697e+07	4.80384e+06	9.5076e+06	7.4814e+06	8.02751e+06	1.32789e+07	3.376e+06	7.40973e+06	4.58907e+06	7.4012e+06	6.28642e+06	5.12675e+06	5.66849e+06	7.79296e+06	7.00597e+06	5.04754e+06	1.11744e+08	6.76013e+06	3.47704e+06	4.89625e+06	6.47841e+06	2.23775e+06	5.7294e+06	5.5584e+06	5.04478e+06	1.52639e+07	9.36197e+06	1.66509e+07	6.86224e+06	7.13939e+06	7.15833e+06	7.5348e+06	7.18276e+06	5.73404e+06	6.16792e+06	6.28761e+06	4.66407e+06	4.41753e+06	7.50719e+06	2.23343e+07
Com_122_neg	(±)11-HETE	C20 H32 O3	320.235	13.382	319.228	Full match	No results	Full match	4.84849e+06	6.00312e+06	2.60738e+07	2.80601e+07	3.75642e+06	4.63384e+06	4.06971e+06	2.32304e+07	2.70922e+07	3.12037e+07	3.91459e+07	1.56665e+06	1.49733e+06	3.28303e+06	2.45266e+06	5.7809e+06	2.20844e+06	1.49701e+07	1.04672e+07	6.07867e+06	7.60504e+06	1.88817e+07	8.63125e+08	2.76782e+06	1.38625e+06	2.73106e+07	2.94291e+07	2.58951e+07	1.70066e+06	4.62075e+07	1.0498e+06	2.9654e+07	1.44456e+06	1.14397e+06	9.94089e+06	4.44937e+06	1.15953e+07	1.38669e+06	1.05897e+06	4.13581e+06	2.90688e+06
Com_1231_neg	Glycocholic acid	C26 H43 N O6	465.309	12.054	464.302	Full match	No results	No results	4.85119e+06	1.7666e+06	2.58865e+07	2.86267e+06	4.88362e+06	9.01721e+06	1.83527e+07	4.44843e+06	2.09557e+07	4.98367e+06	7.59281e+06	1.15017e+07	7.46453e+06	2.5292e+07	1.14252e+07	9.41725e+07	1.43463e+07	8.48673e+06	5.15076e+06	1.8404e+07	2.25126e+07	1.7054e+07	3.55282e+07	7.55558e+07	8.04728e+06	1.7548e+07	1.50455e+07	1.28424e+07	3.52092e+07	7.89875e+06	5.34426e+07	4.4034e+07	6.0161e+06	2.69329e+07	1.03357e+06	1.73749e+07	2.54067e+07	2.07809e+07	1.59375e+06	2.25104e+07	1.02153e+08
Com_1242_neg	L-Cysteine-S-sulfate	C3 H7 N O5 S2	200.977	1.151	199.97	Full match	Full match	Full match	910518	1.24104e+06	3.81718e+07	4.19643e+07	2.67036e+07	2.14432e+07	3.55912e+07	3.57278e+07	4.69605e+07	3.51146e+07	6.28848e+07	1.83432e+06	1.28416e+06	4.92859e+07	1.64025e+06	4.17338e+07	1.9164e+07	2.77775e+07	4.8963e+07	1.36321e+07	7.93925e+07	1.95999e+07	2.87942e+06	2.3206e+06	1.79775e+06	1.34377e+06	4.54936e+07	5.05923e+07	2.64185e+06	8.06331e+07	1.77416e+06	6.18617e+07	2.35271e+06	3.22683e+06	8.555e+07	1.10674e+07	3.30963e+07	917895	2.10056e+06	3.14443e+07	4.46155e+07
Com_12478_neg	N-[4-(diethylamino)phenyl]-N'-phenylurea	C17 H21 N3 O	319.146	7.597	318.138	Invalid mass	No results	No results	46285.6	98885.4	72498.4	91660.5	75451.2	73253.9	93206.8	57362.3	99442.1	89469.2	105940	88735.9	73700.1	79416	69986.7	91893.6	143551	78198.2	82034.2	58829.8	73817.3	90330.7	456129	99233.4	103298	71545.4	94491.4	89795.4	154835	73382.8	94410.5	90047.8	84645	151397	102391	86453	74507.9	73189	80952	107336	112636
Com_1252_neg	D-Gluconic acid	C6 H12 O7	196.058	1.16	195.051	No results	No results	Full match	1.15645e+07	2.16324e+07	1.77233e+07	2.36027e+07	2.42905e+07	2.41982e+07	2.81676e+07	1.11637e+07	3.45671e+07	2.19548e+07	3.28187e+07	2.00887e+07	1.81965e+07	1.80174e+07	2.53656e+07	3.08707e+07	1.93985e+07	1.95252e+07	3.02025e+07	1.75924e+07	1.77428e+07	2.83976e+07	5.46164e+07	2.49272e+07	1.74123e+06	1.94489e+07	3.1165e+07	1.58521e+07	2.57705e+07	2.2078e+07	2.05085e+07	1.86739e+07	1.05414e+07	1.81137e+07	3.05164e+07	3.07645e+07	1.36966e+07	1.83433e+07	2.13112e+06	2.47234e+07	1.66171e+07
Com_1253_neg	Xylitol	C5 H12 O5	152.069	1.307	151.062	No results	No results	Full match	1.60786e+07	8.29668e+06	1.34617e+07	1.213e+07	1.83498e+07	1.27947e+07	1.36729e+07	1.18084e+07	1.11512e+07	1.34248e+07	1.16592e+07	1.53032e+07	1.32808e+07	1.45727e+07	1.8435e+07	1.0871e+07	1.03113e+07	1.44272e+07	1.13967e+07	1.61245e+07	1.30279e+07	1.31028e+07	5.45105e+07	1.45026e+07	1.67258e+07	1.88344e+07	1.21054e+07	1.23966e+07	1.07174e+07	8.86244e+06	1.22682e+07	1.03162e+07	1.07567e+07	1.03724e+07	1.12505e+07	9.17126e+06	1.67044e+07	1.51909e+07	1.83164e+07	1.86096e+07	2.00576e+07
Com_12661_neg	Glycohyocholic acid Sodium salt	C26 H42 N Na O6	487.292	12.033	486.284	No results	No results	Full match	62986.9	94416.3	180237	114646	104133	171198	220430	78707.7	192455	120270	109460	113936	99926	93528	91246.2	842308	98121.8	112174	112458	100258	152362	105376	222688	649729	111552	106996	131121	135650	221427	115520	210979	190217	114440	128216	130125	126816	98737	104492	105268	136165	523163
Com_12678_neg	Xanthurenic Acid	C10 H7 N O4	205.037	14.902	204.03	No results	No results	Full match	133425	202170	178205	337343	189179	217980	177179	124257	274872	237757	315205	224138	225810	144680	224797	207765	363015	239530	461723	189498	264178	278170	88482.8	311351	333450	209201	75095.2	853960	271101	205874	212757	214546	336681	216370	181531	231900	161312	204990	164417	190639	248261
Com_1281_neg	LPI 20:4	C29 H49 O12 P	620.297	13.72	619.29	No results	Full match	No results	2.11826e+07	6.86919e+07	3.41915e+07	2.89302e+07	3.72511e+07	3.16143e+07	1.89916e+07	4.28715e+07	1.00603e+08	3.82815e+07	4.88216e+07	6.15811e+07	6.73769e+07	2.61935e+07	1.34408e+07	3.89452e+07	2.35282e+07	2.37918e+07	2.62746e+07	4.17162e+07	3.78147e+07	3.64711e+07	1.32996e+07	7.62449e+07	3.14752e+07	3.73718e+07	4.42727e+07	4.21806e+07	6.45218e+07	4.77602e+07	4.42216e+07	5.1619e+07	2.8398e+07	3.8238e+07	2.1875e+07	4.62576e+07	3.82157e+07	2.03715e+07	3.68789e+07	5.30673e+07	2.88623e+07
Com_1294_neg	PE (18:1/20:4)	C43 H76 N O8 P	765.532	15.837	764.524	No results	Full match	No results	2.19348e+07	3.03809e+07	3.37602e+07	3.20554e+07	3.39185e+07	7.10184e+07	1.11917e+08	3.22894e+07	6.67325e+07	1.03273e+06	3.88434e+07	3.56767e+07	2.31137e+07	3.23984e+07	6.28112e+07	4.21871e+07	2.91228e+07	4.54151e+07	3.15954e+07	1.46398e+07	2.93755e+07	1.7688e+07	1.88566e+07	1.34169e+07	3.82328e+07	5.36852e+07	4.5425e+07	3.16431e+07	3.77445e+07	7.74387e+07	3.13584e+07	3.61818e+07	3.32957e+07	2.68044e+07	5.51984e+07	2.72761e+07	1.34162e+06	1.66474e+07	4.99685e+07	1.90838e+07	3.77051e+07
Com_1296_neg	PC (18:2/22:6)	C48 H80 N O8 P	889.577	16.054	888.57	No results	Invalid mass	No results	4.22401e+07	5.13772e+07	3.49033e+07	5.17803e+07	4.98257e+07	5.87131e+07	5.58412e+07	5.95607e+07	4.62065e+07	3.943e+07	4.33178e+07	4.47307e+07	4.78256e+07	3.94057e+07	5.52287e+07	4.73946e+07	5.73094e+07	4.28528e+07	3.00797e+07	3.89869e+07	3.23917e+07	5.30359e+07	1.62892e+07	5.09548e+07	8.10127e+07	2.48514e+07	3.26668e+07	4.03693e+07	1.09418e+08	3.58476e+07	1.03083e+08	6.12202e+07	4.06829e+07	8.3681e+07	3.90613e+07	1.83905e+07	2.29979e+07	4.25356e+07	3.54947e+07	4.63408e+07	5.7705e+07
Com_12_neg	Azelaic acid	C9 H16 O4	188.105	3.374	187.098	Full match	Full match	Full match	2.76539e+07	4.19698e+07	3.68955e+07	4.07061e+07	4873892300	4.4193e+09	7.90216e+09	3.07098e+07	3.85751e+09	4.04323e+07	4.3919e+07	4.31937e+07	3.64585e+07	3.18508e+07	1.04871e+09	2.04638e+09	1.99594e+09	3.86663e+07	4.31545e+07	2.60664e+07	3.06634e+07	3.65962e+07	1.0937e+10	5.27772e+07	3.17908e+08	6.0442e+08	5.25957e+07	5.06217e+07	6.51862e+07	4.60019e+07	4.75994e+07	5.19807e+07	4.64614e+07	7.01513e+08	5.0146e+07	6.65023e+09	3.57953e+09	8.25497e+08	3.17654e+08	1.94195e+09	2.91935e+09
Com_13118_neg	Bialaphos	C11 H22 N3 O6 P	646.249	9.2	322.117	Invalid mass	No results	No results	99583.4	51130.8	51269.1	59350.2	124771	103771	86223.9	39759.7	89708.7	56220	61889.5	60526.8	53930.1	48725.1	79461.1	146614	73085.9	59029.9	63458.3	112703	45793.1	59532.6	31532.2	640749	70851.4	47689.4	67607.5	71152.6	113921	58211.6	62090.1	67699.4	68565.3	72988.8	74637.6	73595.1	120694	64274.9	58258.8	121713	95995.9
Com_1311_neg	Glycodeoxycholic acid	C26 H43 N O5	449.315	12.734	448.307	Full match	No results	Full match	1.9045e+06	3.62069e+06	4.77177e+07	1.58071e+07	3.34979e+07	9.12915e+06	2.65792e+07	1.00044e+07	2.6923e+07	1.39747e+07	4.17198e+07	2.77086e+07	2.5343e+07	3.17013e+07	1.12402e+07	2.02305e+07	7.28544e+07	1.46131e+07	8.85322e+06	3.4695e+07	9.42923e+06	2.00666e+07	3.28524e+07	5.10737e+07	1.20597e+07	6.31557e+07	3.67066e+07	1.6399e+07	4.14813e+07	1.64937e+07	4.74241e+07	1.03026e+08	1.90581e+07	7.43901e+07	1.32762e+07	1.79445e+07	7.21035e+07	1.67364e+07	1.02678e+07	3.9694e+07	6.59126e+07
Com_1313_neg	FAHFA (2:0/22:0)	C24 H46 O4	398.34	14.668	397.332	No results	Full match	No results	8.92367e+06	1.65219e+07	5.65991e+07	7.76588e+07	3.18186e+07	1.12159e+07	1.48763e+07	2.46003e+07	1.29752e+07	1.79556e+07	2.51944e+07	4.55971e+07	5.56246e+07	8.41007e+07	2.14238e+07	3.46638e+07	5.57666e+07	1.19628e+07	4.82652e+07	9.45506e+06	4.89112e+07	5.37042e+07	1.14744e+07	4.08401e+07	2.61937e+07	3.77115e+07	3.01934e+07	3.53478e+07	2.83665e+07	3.41192e+07	3.70522e+07	4.10322e+07	4.50442e+07	2.68445e+07	3.91989e+07	4.9605e+07	2.29819e+07	1.36857e+07	3.28983e+07	2.38509e+07	2.12932e+07
Com_1325_neg	Taurolithocholic acid 3-sulfate	C26 H45 N O8 S2	563.259	11.686	562.253	Full match	No results	No results	4.06146e+07	1.67048e+06	1.40764e+07	3.51887e+06	2.15357e+07	2.49637e+07	2.25826e+07	1.80814e+07	2.93656e+07	2.3677e+07	2.07783e+07	9.92644e+06	9.30767e+06	4.35117e+07	1.17023e+07	1.70476e+06	9.73455e+06	8.67243e+06	7.35575e+06	3.43819e+06	1.2971e+06	2.18258e+07	3.07538e+06	1.06531e+08	2.60545e+07	1.57058e+07	1.03503e+07	3.83759e+06	7.41684e+07	1.70427e+07	1.18476e+07	1.76354e+07	5.64435e+06	3.56199e+07	1.25005e+07	6.04171e+06	1.50929e+07	1.73735e+06	1.27326e+07	2.4074e+06	5.45749e+06
Com_132_neg	DL-β-Leucine	C6 H13 N O2	131.095	2.534	130.088	Full match	No results	Full match	2.1567e+08	2.33323e+08	2.77785e+08	3.80041e+08	2.8648e+08	2.76415e+08	3.34755e+08	2.60362e+08	4.86023e+08	3.32227e+08	3.7399e+08	2.85383e+08	3.02803e+08	3.2066e+08	3.42541e+08	2.52982e+08	2.71592e+08	2.60828e+08	3.27947e+08	3.13989e+08	2.27878e+08	2.94322e+08	7.76034e+08	4.48823e+08	2.11967e+08	5.94842e+07	2.53318e+08	2.15257e+08	2.70333e+08	2.60287e+08	3.16509e+08	2.99319e+08	2.77424e+08	3.0726e+08	3.30842e+08	2.68314e+08	1.96234e+08	3.03346e+08	2.66056e+08	2.70351e+08	2.64277e+08
Com_1387_neg	(S)-beta-Aminoisobutyric Acid	C4 H9 N O2	103.063	1.149	102.056	No results	No results	Full match	1.02477e+07	1.42828e+07	1.29932e+06	1.55545e+06	1.45813e+07	1.07896e+07	1.5577e+07	9.87644e+06	2.55598e+07	1.34583e+07	2.81713e+07	1.05529e+07	7.25362e+06	1.47581e+07	2.90002e+07	1.22681e+07	1.14582e+07	2.3161e+07	2.1566e+07	1.50485e+07	1.48444e+07	1.70184e+06	4.66155e+07	1.68405e+07	4.45463e+06	1.75727e+07	1.92046e+07	1.36027e+07	9.16009e+06	1.46146e+07	9.81163e+06	1.5493e+07	9.81096e+06	1.32925e+06	2.06923e+07	1.81387e+07	1.49472e+07	7.98122e+06	9.34426e+06	1.47662e+07	1.54774e+07
Com_13893_neg	3-Nitro-L-Tyrosine	C9 H10 N2 O5	226.058	1.162	261.028	No results	No results	Full match	17365	34645.8	44191.5	30892.4	51480.9	20165.6	29162.2	20033.4	91360.4	41805.6	62435	24307.6	20540.4	25860.4	30045.4	39668.4	33025.2	26465.6	30758.4	28759.2	20064.8	51780.7	37203.5	23145	28488.4	22009.4	32922.1	32742.9	37688.9	36629.5	49624	29861.1	23567.7	32484	55211.8	49513.8	43836.3	23454.9	19066.5	39268.3	33737.9
Com_1398_neg	3-Indoxyl sulphate	C8 H7 N O4 S	213.01	5.905	212.003	Full match	Full match	Full match	7.03239e+06	5.28635e+07	4.49538e+07	7.09912e+07	7.94061e+07	4.03022e+07	6.2287e+07	6.9665e+06	5.83145e+07	5.17659e+07	8.32766e+07	2.58833e+07	3.59116e+07	1.72412e+07	9.71028e+06	3.01093e+07	3.10833e+07	3.31421e+07	3.15073e+07	3.56645e+07	7.34791e+07	7.46889e+07	2.75294e+07	7.81418e+07	5.35449e+07	3.99898e+07	8.26804e+07	2.37775e+07	8.51664e+07	5.87103e+07	3.08178e+07	3.83285e+07	2.67164e+07	9.25321e+07	4.59299e+07	3.75132e+07	1.4874e+07	4.21603e+07	2.41627e+07	5.67213e+07	2.57802e+07
Com_139_neg	11(E)-Eicosenoic Acid	C20 H38 O2	310.287	14.762	309.28	Full match	No results	Full match	8.46343e+08	5.18319e+08	3.82637e+08	3.01964e+08	5.94582e+08	4.67955e+08	5.09267e+08	7.44576e+08	4.25835e+08	6.82212e+08	7.14561e+08	6.76452e+08	6.73778e+08	3.8113e+08	3.24162e+08	3.13614e+08	3.89378e+08	4.94281e+08	3.06737e+08	7.67754e+08	4.16192e+08	3.46162e+08	5.23058e+08	4.87531e+08	6.39055e+08	3.51186e+08	3.54938e+08	4.48043e+08	4.35502e+08	3.78077e+08	5.61963e+08	3.34145e+08	4.65473e+08	5.67904e+08	3.76694e+08	3.93744e+08	4.15619e+08	7.33255e+08	4.31758e+08	5.62494e+08	3.93859e+08
Com_1423_neg	trans-Cinnamic acid	C9 H8 O2	148.053	8.399	147.045	Full match	Full match	No results	353553	605391	572146	677633	1.77589e+06	2.12299e+06	3.14108e+06	473775	5.7324e+06	655322	619731	695579	627364	551937	1.30991e+06	2.57292e+06	1.37439e+06	518356	608800	399558	372545	557392	4.50787e+07	564713	8.53436e+06	5.03707e+06	863046	822714	1.10884e+06	701440	892564	839156	826580	1.40703e+06	822766	3.06459e+06	2.38845e+06	1.79454e+06	1.01103e+06	2.08934e+06	1.94079e+06
Com_1426_neg	PC (18:1/22:5)	C48 H84 N O8 P	893.617	14.757	892.61	No results	Invalid mass	No results	5.82392e+06	1.01317e+07	1.22634e+07	3.07032e+07	1.60658e+07	1.36389e+07	1.32665e+07	1.11104e+07	1.27797e+07	1.52975e+07	1.83065e+07	2.13494e+07	1.27248e+07	1.73509e+07	1.54749e+07	1.43259e+07	1.44282e+07	1.61197e+07	1.52686e+07	1.34305e+07	7.16078e+07	1.44234e+07	5.42159e+06	1.8836e+07	1.6104e+07	1.05344e+07	1.62155e+07	1.81885e+07	2.06717e+07	8.40008e+06	1.73744e+07	1.52299e+07	1.86821e+07	2.08494e+07	1.07949e+07	1.35863e+07	1.24898e+07	1.16826e+07	1.60362e+07	2.06539e+07	1.67705e+07
Com_1427_neg	Androsterone glucuronide	C25 H38 O8	466.257	11.511	465.25	Full match	No results	No results	3.29912e+06	6.49354e+06	4.75425e+06	1.25676e+07	5.55301e+07	4.04545e+07	3.74843e+07	3.83687e+06	8.65156e+07	6.58606e+06	5.79609e+06	6.08848e+06	1.25533e+07	4.93718e+06	2.4235e+07	7.72792e+07	1.67688e+07	5.69964e+06	5.06961e+06	6.07629e+06	5.24273e+06	3.02781e+06	7.09651e+06	7.25927e+06	1.03082e+07	8.22844e+06	9.6653e+06	7.25678e+06	7.92004e+06	8.76253e+06	6.29263e+06	6.72422e+06	8.78493e+06	1.12005e+07	1.13431e+07	3.47765e+07	8.11869e+06	7.38796e+06	5.33089e+06	3.61872e+07	1.48231e+07
Com_1430_neg	3-Hydroxy-3-methylbutanoic acid	C5 H10 O3	118.063	1.583	117.056	Full match	Full match	Full match	1.35573e+07	2.23156e+07	2.1187e+07	2.07015e+07	2.55335e+07	1.93224e+07	2.36782e+07	1.52955e+07	2.51251e+07	2.82386e+07	3.29278e+07	2.48798e+07	2.6193e+07	1.79143e+07	2.49804e+07	2.00733e+07	2.5784e+07	2.34733e+07	2.44559e+07	1.70451e+07	2.01621e+07	2.19375e+07	4.48193e+07	2.70807e+07	2.04953e+07	2.106e+07	2.56639e+07	2.39526e+07	2.8459e+07	1.78209e+07	2.37591e+07	2.87771e+07	2.02277e+07	2.11988e+07	2.32787e+07	2.52619e+07	2.14268e+07	2.24069e+07	2.18754e+07	3.13131e+07	2.01752e+07
Com_1447_neg	Spiculisporic Acid	C17 H28 O6	328.189	12.052	327.182	No results	No results	Full match	6.84177e+06	2.3872e+06	2.28761e+07	3.66972e+07	357011	284114	244096	1.83738e+07	290498	2.18534e+07	2.2542e+07	1.83045e+06	3.02012e+06	5.78285e+07	344217	301436	280665	7.9343e+07	5.21063e+07	3.45707e+07	7.06301e+07	4.43697e+07	178330	2.77902e+06	386070	215715	1.91225e+07	2.53403e+07	1.40079e+06	4.6882e+07	1.40378e+06	2.68008e+07	2.30806e+06	344530	3.37087e+07	306101	351024	195628	324134	365106	253407
Com_145_neg	Adrenic acid	C22 H36 O2	286.266	14.449	285.26	Invalid mass	Invalid mass	No results	4.93997e+08	4.85156e+08	2.82062e+08	2.75371e+08	3.41127e+08	2.59339e+08	2.35171e+08	5.38617e+08	3.19304e+08	1.19113e+08	3.17223e+08	2.87596e+08	3.81292e+08	2.54614e+08	2.5759e+08	2.31005e+08	3.32231e+08	4.19397e+08	3.12094e+08	3.09117e+08	2.44625e+08	2.57497e+08	7.26424e+08	3.94267e+08	3.92461e+08	3.88837e+08	3.40018e+08	3.37964e+08	2.23002e+08	2.57695e+08	3.89065e+08	3.82646e+08	2.86631e+08	2.54259e+08	2.71645e+08	3.13903e+08	4.09055e+08	5.96456e+08	4.5549e+08	2.33605e+08	3.70253e+08
Com_1467_neg	PC (20:3/20:4)	C48 H82 N O8 P	891.6	16.118	890.591	No results	Invalid mass	No results	1.2521e+06	1.7801e+06	1.63718e+06	1.17092e+06	2.25737e+06	1.83636e+06	1.1209e+06	1.47242e+06	2.53741e+06	1.94141e+06	2.18158e+06	2.01612e+06	1.6393e+06	1.61563e+06	1.89847e+06	2.38427e+06	2.42792e+06	2.08876e+06	1.95153e+06	1.09046e+06	2.02815e+06	2.16392e+06	1.10777e+06	1.449e+06	2.43377e+06	1.04895e+06	9.08265e+07	1.48889e+06	971244	1.63965e+06	1.4442e+06	2.23263e+06	2.3549e+06	852628	8.1119e+07	1.65237e+06	1.47769e+06	2.08736e+06	1.55958e+06	1.64901e+06	1.56119e+06
Com_1487_neg	2,4-Dihydroxybenzoic acid	C7 H6 O4	154.027	6.848	153.02	Full match	Full match	Full match	6.13301e+06	6.66591e+07	3.01037e+07	2.08717e+07	1.29204e+07	7.89772e+06	1.30339e+07	1.69793e+07	9.91637e+06	3.77894e+06	8.10833e+06	2.57969e+07	2.52675e+07	6.36976e+06	4.20712e+07	2.05632e+07	1.71907e+07	1.25089e+07	4.45568e+07	1.02788e+07	3.65319e+07	1.42112e+07	7.39856e+06	1.78323e+07	1.75068e+07	1.46372e+07	8.71558e+06	1.45412e+07	1.69858e+07	3.82238e+07	6.94097e+06	1.59953e+07	9.56388e+06	1.6697e+07	9.21001e+06	1.60155e+07	1.28883e+07	7.30125e+06	5.64483e+06	1.68867e+07	1.4494e+07
Com_1492_neg	D-Ribose-1-phosphate	C5 H11 O8 P	192.063	1.156	191.056	Invalid mass	No results	No match	4.42053e+06	8.14196e+06	8.02095e+06	8.08805e+06	7.9067e+06	7.17376e+06	8.2882e+06	4.52231e+06	9.1827e+06	6.03584e+06	8.64069e+06	8.6546e+06	5.83202e+06	5.95738e+06	7.73977e+06	7.31681e+06	5.90935e+06	1.0589e+07	8.28127e+06	6.11226e+06	5.75926e+06	7.3423e+06	9.5191e+06	7.2712e+06	1.23154e+07	5.86324e+06	1.00064e+07	1.37421e+07	1.69768e+07	6.94834e+07	1.74906e+07	9.72092e+06	8.73603e+06	9.1728e+06	1.15293e+07	1.07915e+07	6.45528e+06	6.939e+06	6.17321e+06	9.24604e+06	1.10544e+07
Com_1493_neg	PE (20:0/20:3)	C45 H84 N O8 P	797.595	15.423	796.589	No results	Full match	No results	2.98571e+07	3.9892e+07	7.45478e+07	3.5535e+07	3.58805e+07	4.40816e+07	3.46663e+07	3.2633e+07	3.19547e+07	4.66667e+07	4.58864e+07	4.56168e+07	2.4526e+07	3.62416e+07	4.06123e+07	5.37895e+07	4.18871e+07	2.67e+07	3.63113e+07	2.68972e+07	2.33389e+07	4.20482e+07	2.69212e+07	5.25849e+07	5.51439e+07	2.68683e+07	4.11317e+07	4.63023e+07	4.24001e+07	2.94553e+07	6.11875e+07	4.66884e+07	3.25914e+07	4.34928e+07	5.99471e+07	3.70785e+07	2.0408e+07	4.0013e+07	2.23538e+07	4.4633e+07	2.11232e+07
Com_150_neg	(±)19(20)-DiHDPA	C22 H34 O4	362.244	14.123	361.236	Invalid mass	No results	No results	7.89754e+08	6.75326e+08	5.44547e+08	6.10491e+08	6.81497e+08	5.38281e+08	6.8519e+08	6.5835e+08	6.15745e+08	7.63739e+08	7.63481e+08	7.42403e+08	9.47611e+08	6.92174e+08	6.71357e+08	4.94129e+08	4.98372e+08	6.02731e+08	4.72813e+08	8.10189e+08	6.50269e+08	5.94739e+08	4.73482e+08	6.58204e+08	6.92721e+08	5.00286e+08	6.01247e+08	7.83914e+08	5.08457e+08	6.55662e+08	7.11025e+08	2.62244e+08	7.22389e+08	5.86616e+08	6.01275e+08	6.19841e+08	6.9499e+08	8.01651e+08	8.95401e+08	5.14813e+08	7.81618e+08
Com_1533_neg	(R)-3-Hydroxy myristic acid	C14 H28 O3	244.204	13.116	243.197	Full match	Full match	No results	8.33746e+06	9.56511e+06	8.54873e+06	8.71195e+06	2.09753e+07	1.12722e+07	3.20807e+07	1.20664e+07	1.31082e+07	8.57793e+06	8.23765e+06	7.83016e+06	1.08873e+07	7.04676e+06	5.72906e+06	1.3727e+07	1.10692e+07	6.4907e+06	5.83631e+06	4.86422e+06	5.31902e+06	8.48357e+06	4.058e+07	9.2207e+06	8.19836e+06	9.38447e+06	1.15702e+07	6.80039e+06	6.80113e+06	1.49509e+06	6.85908e+06	6.8975e+06	6.63773e+06	6.98268e+06	6.93993e+06	9.50181e+06	6.55227e+06	1.22472e+07	1.02333e+07	9.93775e+06	1.073e+07
Com_1551_neg	L-(+)-Arabinose	C5 H10 O5	150.053	1.245	149.046	No results	No results	Full match	2.27421e+06	1.41518e+07	1.68176e+07	2.41384e+07	1.58495e+07	1.50024e+07	1.95326e+07	1.2847e+07	1.79654e+07	1.59288e+07	2.21868e+07	2.04848e+07	2.02816e+07	1.6037e+07	1.79551e+07	1.77041e+07	1.6879e+07	1.50688e+07	1.5164e+07	1.2774e+07	1.46793e+07	1.71746e+07	3.99667e+07	1.92407e+07	1.55852e+07	1.75361e+07	1.64445e+07	1.5899e+07	1.85297e+07	1.32183e+07	1.4098e+07	1.76786e+07	1.25161e+07	1.85959e+07	2.02757e+07	1.68742e+07	1.21705e+07	1.15645e+07	1.24128e+07	1.51359e+07	1.40698e+07
Com_1575_neg	PC (16:0e/18:2)	C42 H82 N O7 P	803.606	15.755	802.599	No results	Invalid mass	No results	1.15307e+07	2.53908e+07	1.24756e+07	1.3845e+07	1.88652e+07	2.62188e+07	2.19501e+07	3.29431e+06	2.67593e+07	1.59211e+07	3.46342e+07	3.16126e+07	1.56609e+07	2.67447e+07	1.84804e+07	2.92661e+07	2.44748e+06	2.44804e+07	1.65798e+07	1.34331e+07	1.67976e+07	3.3409e+07	3.89167e+07	4.01496e+07	3.56959e+07	2.51095e+07	2.77076e+07	2.50478e+07	3.44144e+07	1.72459e+07	3.04153e+07	6.19965e+07	2.95528e+07	3.04821e+07	4.07159e+07	2.86316e+07	1.13143e+07	2.51177e+07	1.12327e+07	2.32592e+07	1.72751e+07
Com_1581_neg	Monobutyl phthalate	C12 H14 O4	222.089	9.518	221.082	Full match	No results	Full match	677342	805666	913796	2.41501e+06	942918	1.03448e+06	1.43404e+06	1.84461e+06	2.22815e+06	1.96565e+06	2.99537e+06	1.16239e+06	915114	1.31035e+06	1.03911e+06	1.1202e+06	1.07217e+06	1.10466e+06	1.99824e+07	753217	1.29476e+06	1.01113e+06	990176	973518	1.2029e+06	1.08041e+06	1.85788e+06	2.81313e+06	1.27749e+06	3.80367e+06	1.18522e+06	2.59455e+06	980403	965674	1.45943e+06	1.26817e+06	1.04943e+06	933258	1.02864e+06	1.31052e+06	951643
Com_1584_neg	Docosatrienoic acid	C22 H38 O2	334.288	14.64	333.28	Full match	No results	No results	2.95757e+07	3.53738e+07	2.53798e+07	2.92116e+07	3.30722e+07	3.0427e+07	2.1764e+07	4.221e+07	2.76255e+07	2.74673e+07	2.62459e+07	2.59539e+07	2.47849e+07	1.88947e+07	2.80521e+07	1.80578e+07	1.99415e+07	3.15256e+07	2.26422e+07	3.6155e+07	1.80023e+07	1.76991e+07	2.94378e+07	2.77751e+07	3.42958e+07	3.77203e+07	2.15424e+07	1.98765e+07	2.16217e+07	2.03996e+07	3.34377e+07	2.5592e+07	2.53631e+07	2.95636e+07	2.06444e+07	1.83053e+07	2.09877e+07	4.00703e+07	2.52266e+07	2.11487e+07	2.90882e+07
Com_1594_neg	Cer-NS (d18:1/22:0)	C40 H79 N O3	621.607	16.35	620.599	No results	Full match	No results	2.18886e+07	2.11577e+07	3.73989e+07	4.24403e+07	3.1388e+07	3.44309e+07	5.04502e+07	3.89681e+07	5.67716e+07	3.92128e+07	4.06532e+07	4.14821e+07	3.74914e+07	2.66861e+07	2.6944e+07	3.10419e+07	2.03049e+07	3.21912e+07	6.02142e+07	2.39149e+07	2.02762e+07	3.1335e+07	1.91669e+07	5.32181e+07	2.35229e+07	2.9092e+07	4.18365e+07	4.28332e+07	5.27772e+07	2.57015e+07	5.19381e+07	4.27482e+07	4.2822e+07	6.29566e+07	8.12421e+07	4.0184e+07	3.8007e+07	1.88424e+07	3.47228e+07	2.13394e+07	3.17489e+07
Com_15_neg	16-Hydroxyhexadecanoic acid	C16 H32 O3	254.225	13.961	253.217	Invalid mass	No results	No match	1.03808e+10	7.24428e+09	3.91972e+09	3.93797e+09	5.12841e+09	5.44419e+09	4.23954e+09	8.17044e+09	5044825820	7.44224e+09	6.67206e+09	9.17384e+09	7.77344e+09	5.31979e+09	4.74361e+09	3.5841e+09	4.88234e+09	5.80759e+09	4.97718e+09	1.03926e+10	4.758e+09	4.38647e+09	5.15601e+09	5.38105e+09	5.8107e+09	4.55577e+09	3.68788e+09	5.54804e+09	3.68168e+09	3.89674e+09	4.89437e+09	4.83887e+09	6.16403e+09	4.18945e+09	3.84284e+09	3.83864e+09	7.35226e+09	6.80833e+09	6.3703e+09	3.74911e+09	7.62809e+09
Com_1634_neg	Mag (18:1)	C21 H40 O4	356.293	14.886	355.287	No results	No results	Full match	5.79768e+06	1.82818e+06	1.87626e+06	3.33013e+06	2.72574e+07	1.66998e+07	5.67977e+06	1.91445e+07	5.93951e+06	5.96777e+06	2.28143e+07	3.02195e+06	2.23592e+06	4.02517e+06	5.20674e+06	3.25407e+06	3.89601e+06	1.03974e+07	2.58213e+06	5.27759e+07	3.66544e+06	2.87259e+06	1.12849e+06	3.63454e+06	1.60587e+06	2.26265e+06	3.57946e+06	4.02757e+06	4.94716e+06	3.03689e+06	3.54829e+06	8.92633e+06	1.96316e+06	1.09919e+07	4.23062e+06	2.43233e+06	2.59643e+06	1.42402e+07	2.06086e+06	3.15387e+06	1.92832e+07
Com_1638_neg	Pentacosanoic acid	C25 H50 O2	382.382	15.713	381.374	Full match	No results	No results	1.60295e+07	4.27011e+07	3.72499e+07	3.51335e+07	2.70201e+07	2.2194e+07	1.76621e+07	1.52763e+07	2.9131e+07	4.52509e+07	3.65935e+07	2.65376e+07	4.31388e+07	3.20335e+07	2.79643e+07	6.36953e+07	7.02616e+07	4.19197e+07	3.24235e+07	3.78207e+07	4.67175e+07	7.15641e+07	1.68896e+07	5.96619e+07	3.6869e+07	2.76011e+07	5.56264e+07	3.97274e+07	2.68494e+07	2.35756e+07	4.42791e+07	7.05324e+07	5.83124e+07	5.39968e+07	5.03959e+07	3.81594e+07	2.34702e+07	2.26423e+07	4.59862e+07	3.4909e+07	2.24143e+07
Com_1642_neg	Glycoursodeoxycholic acid	C26 H43 N O5	449.315	11.635	448.307	Full match	No results	Full match	479031	2.02198e+07	9.56864e+06	2.01288e+06	1.3929e+06	1.0767e+06	4.2703e+06	2.32007e+06	2.85113e+06	769939	8.28443e+06	4.37869e+07	7.77104e+06	1.05678e+07	1.19067e+07	5.3969e+07	5.60865e+06	1.39615e+06	2.50161e+06	1.31111e+07	4.70348e+07	2.29654e+06	824788	6.29416e+06	2.25523e+06	8.10744e+06	1.17664e+06	2.84136e+07	1.91664e+06	2.11758e+06	9.91271e+06	9.81268e+06	5.55023e+06	1.21838e+07	1.09774e+06	4.92415e+06	6.78615e+06	6.16103e+07	436970	7.87726e+07	3.573e+06
Com_1663_neg	LPC 20:5	C28 H48 N O7 P	601.338	14.123	600.331	No results	Invalid mass	No results	3.19737e+06	7.31354e+06	6.7521e+06	6.40777e+06	1.32906e+07	3.09343e+06	6.57262e+06	5.73153e+06	4.19265e+07	4.19762e+06	7.38448e+07	1.09646e+07	3.28324e+06	3.88188e+06	2.77458e+06	9.64006e+06	5.44538e+06	1.00538e+07	5.47255e+06	1.39595e+07	2.3164e+06	1.00662e+07	2.75875e+06	3.39569e+06	6.11603e+06	4.2027e+06	2.31835e+07	1.00808e+07	2.06789e+07	1.46242e+07	8.48244e+06	2.23535e+07	5.31174e+06	5.50041e+06	9.29499e+06	1.07404e+07	5.20321e+06	4.52226e+06	7.33581e+06	3.52435e+06	3.06927e+06
Com_1695_neg	4-Methylphenol	C7 H8 O	108.058	7.65	107.05	Full match	No results	Full match	1.73128e+06	3.25872e+07	3.53483e+06	1.8855e+07	4.83302e+06	4.82013e+06	1.20155e+07	4.75695e+06	2.90275e+07	1.65798e+07	2.64571e+07	1.28052e+07	1.34525e+06	1.55824e+06	5.0714e+06	1.70919e+06	4.69721e+07	1.1369e+06	2.58839e+06	8.52812e+06	1.65373e+07	1.7558e+07	2.43372e+06	2.044e+07	1.83649e+07	1.14917e+07	9.22261e+06	1.036e+06	9.16672e+07	5.63963e+06	6.93381e+06	1.87089e+07	5.72862e+06	6.41455e+07	2.55725e+07	1.60732e+06	6.80103e+06	2.73689e+06	6.79857e+06	1.08126e+07	9.30623e+06
Com_1705_neg	(+/-)9(10)-EpOME	C18 H32 O3	592.474	14.595	591.467	Invalid mass	No results	No results	4.04134e+06	3.01487e+07	3.26653e+07	6.18697e+07	2.98343e+07	1.99077e+07	2.25274e+07	1.90403e+07	1.44438e+07	2.31459e+07	2.97245e+07	3.67622e+07	5.19583e+07	3.15211e+07	4.46279e+07	6.97321e+07	3.50658e+07	3.8002e+07	3.51237e+07	1.343e+07	5.30774e+07	1.4886e+07	1.39807e+07	6.53178e+07	3.4519e+07	3.58694e+07	2.57254e+07	3.57985e+07	4.20565e+07	3.07413e+07	4.98932e+07	3.10371e+07	3.35409e+07	2.30149e+07	3.24934e+07	4.73195e+07	1.19609e+07	2.15242e+07	5.57942e+07	2.5041e+07	2.16172e+07
Com_1725_neg	cis-Aconitic acid	C6 H6 O6	174.017	1.126	173.009	Full match	Full match	Full match	3.7536e+07	5.62928e+07	3.15654e+07	3.6815e+07	5.73343e+07	3.80393e+07	4.27896e+07	2.93562e+07	4.08025e+07	4.06452e+07	4.16491e+07	3.99831e+07	3.58309e+07	2.64949e+07	2.89278e+07	2.8999e+07	2.96609e+07	2.92092e+07	4.54695e+07	3.21172e+07	2.94744e+07	2.51679e+07	1.90985e+07	3.79769e+07	3.20365e+07	3.79208e+07	4.13383e+07	2.86165e+07	3.00976e+07	2.74684e+07	3.03777e+07	3.96857e+07	2.06979e+07	3.43208e+07	2.45978e+07	3.84607e+07	3.12438e+07	2.87282e+07	2.4953e+07	1.00437e+07	2.07896e+07
Com_1734_neg	Mestranol	C21 H26 O2	310.182	13.357	309.174	No results	Invalid mass	No results	7.18836e+06	1.12021e+07	1.38099e+07	2.27718e+07	1.21432e+07	2.08687e+07	2.11632e+07	2.10517e+07	1.35621e+07	1.7766e+07	1.92101e+07	7.70328e+06	1.09618e+07	2.57419e+07	1.08033e+07	6.80139e+07	1.49966e+07	5.4635e+07	3.52811e+07	2.65586e+07	3.28797e+07	3.36054e+07	2.43337e+07	1.69112e+07	1.2953e+07	7.09195e+06	1.71737e+07	1.70624e+07	1.59066e+07	4.61362e+07	1.08122e+07	2.97565e+07	1.01456e+07	1.05319e+07	1.71393e+07	2.43268e+07	1.47127e+07	1.45745e+07	8.73083e+06	5.27833e+07	1.70781e+07
Com_173_neg	Suberic acid	C8 H14 O4	174.089	1.847	173.082	Full match	Full match	Full match	8.26175e+06	1.34175e+07	1.16214e+07	1.4285e+07	1.17763e+08	1.27307e+08	2.86568e+08	9.61842e+06	1.30948e+08	1.3307e+07	1.42894e+07	1.3496e+07	1.29949e+07	1.09335e+07	4.75548e+07	1.01031e+08	6.50995e+07	1.29716e+07	1.43727e+07	9.38323e+06	1.07039e+07	1.46554e+07	5.40454e+08	1.46627e+07	2.03395e+07	3.39177e+07	1.8387e+07	1.72302e+07	2.04127e+07	1.41333e+07	1.7436e+07	1.47264e+07	1.47479e+07	3.71448e+07	1.59184e+07	2.68344e+08	1.07831e+08	4.36188e+07	2.03129e+07	1.46347e+08	7.95441e+07
Com_1740_neg	LPI 18:2	C27 H49 O12 P	596.297	13.742	595.29	No results	Full match	No results	2.569e+06	3.69537e+07	6.88283e+06	1.8073e+07	4.19241e+07	2.10165e+07	7.01236e+06	1.96755e+07	6.35119e+07	1.30919e+07	2.06045e+07	3.76869e+07	4.24002e+07	6.42048e+06	3.28289e+06	2.5458e+07	1.63915e+07	1.49087e+07	7.48439e+06	3.10259e+07	1.84135e+07	1.00455e+07	2.95035e+06	3.97869e+07	1.65796e+07	4.96866e+06	2.13283e+07	1.13038e+07	3.54785e+07	2.10383e+07	3.17469e+07	2.0265e+07	1.73459e+07	2.30135e+07	8.54519e+06	4.17787e+07	1.72242e+07	7.91619e+06	2.80969e+07	3.24627e+07	7.10708e+06
Com_176_neg	Caprylic acid	C8 H16 O2	144.115	10.577	143.108	Full match	No results	Full match	2.11692e+08	3.29351e+08	3.87883e+08	1.02395e+09	8.07905e+07	7.70787e+07	9.02276e+07	3.15175e+08	8.75221e+07	3.61007e+08	5.68187e+08	3.1489e+08	4.3467e+08	8.84203e+08	1.00236e+08	9.27498e+07	8.37057e+07	7.02998e+08	6.81781e+08	4.68271e+08	8.24126e+08	6.3965e+08	4.29462e+07	2.13171e+08	9.14436e+07	7.9969e+07	7.52557e+08	5.9917e+08	3.29479e+08	7.2135e+08	2.5238e+08	5.71284e+08	4.01356e+08	9.16128e+07	7.15166e+08	8.49981e+07	7.66217e+07	7.41903e+07	7.69151e+07	1.10477e+08	8.10202e+07
Com_1809_neg	Tridecylic acid	C13 H26 O2	214.194	13.429	213.186	Full match	No results	No results	1.42934e+07	1.54858e+07	1.7181e+07	1.82482e+07	2.87603e+07	1.85447e+07	3.42715e+07	1.91642e+07	2.14976e+07	5.37152e+07	4.97847e+07	2.10597e+07	1.98427e+07	1.69049e+07	1.52741e+07	2.18482e+07	1.98626e+07	2.04087e+07	1.76723e+07	1.3642e+07	1.47834e+07	1.5441e+07	1.93322e+07	1.86065e+07	1.81606e+07	1.56711e+07	2.86792e+07	2.01848e+07	4.96829e+07	1.6197e+07	1.88605e+07	1.81426e+07	3.00661e+07	1.85547e+07	2.38168e+07	2.1826e+07	1.79044e+07	3.04256e+07	2.22051e+07	2.3492e+07	2.10053e+07
Com_1830_neg	4,6-dimethyl-2-(methylamino)-5-nitronicotinonitrile	C9 H10 N4 O2	206.079	1.146	205.072	Invalid mass	No results	No results	594601	1.04341e+06	599205	801719	3.21022e+06	2.93592e+06	8.61139e+06	732600	2.79704e+06	874467	831781	797892	637593	654833	3.89684e+06	3.02155e+06	1.67505e+06	935146	962665	644831	644982	923654	3.03594e+07	909284	1.01074e+06	2.49517e+06	905494	854665	1.13805e+06	680086	929003	789384	858082	1.70617e+06	875061	1.04167e+07	2.87125e+06	1.40084e+06	1.02428e+06	2.27028e+06	4.20073e+06
Com_1841_neg	PC (16:0e/20:4)	C44 H82 N O7 P	827.609	16.317	826.602	No results	Invalid mass	No results	7.62737e+06	1.23744e+07	1.21755e+07	1.71961e+07	1.11962e+07	1.80787e+06	1.77455e+07	4.29637e+07	1.16964e+07	1.80958e+07	1.33349e+07	1.87503e+07	2.36167e+06	1.23906e+07	1.61253e+07	1.52604e+07	1.70525e+07	1.45771e+07	1.37813e+07	820458	1.38517e+07	1.49757e+07	7.93504e+06	1.72224e+07	1.5833e+07	1.14347e+07	1.57338e+07	1.89293e+07	1.81811e+07	1.32447e+07	2.28153e+07	1.74194e+07	1.81194e+07	2.09827e+07	1.59351e+07	1.6203e+07	9.46219e+06	1.67188e+07	8.51604e+06	1.68819e+07	1.34447e+07
Com_1847_neg	7-Ketocholesterol	C27 H44 O2	400.334	13.775	399.327	No results	No results	Full match	1.58519e+07	2.8068e+07	1.63363e+07	3.07079e+07	1.11214e+07	1.23336e+07	7.48013e+06	1.39666e+07	2.75478e+07	2.01212e+07	2.45854e+07	1.15109e+07	1.57274e+07	2.14315e+07	7.49937e+06	2.33213e+07	5.93606e+07	3.81516e+07	2.14047e+07	1.27312e+07	1.54412e+07	1.69257e+07	1.22266e+07	3.84994e+07	1.00958e+07	2.72724e+07	1.97123e+07	3.32193e+07	2.23666e+07	1.83775e+07	2.12958e+07	2.4451e+07	3.15632e+07	1.93278e+07	1.78387e+07	1.3524e+07	1.95419e+07	1.61064e+07	3.43904e+07	1.43489e+07	1.13625e+07
Com_1881_neg	3-Ureidopropionic acid	C4 H8 N2 O3	132.054	1.185	131.046	Full match	No results	Full match	2.78634e+07	2.54222e+07	2.8091e+07	5.98445e+07	4.78368e+07	3.44314e+07	4.66865e+07	2.96643e+07	5.39329e+07	4.60318e+07	5.14736e+07	3.27804e+07	3.94868e+07	2.74214e+07	2.22521e+07	5.39338e+07	3.94121e+07	3.06493e+07	4.03863e+07	2.73816e+07	2.78706e+07	4.09619e+07	6.92132e+06	4.23776e+07	3.70684e+07	2.13651e+07	4.15937e+07	3.74114e+07	5.14344e+07	3.31461e+07	3.70306e+07	3.90591e+07	2.88457e+07	4.00919e+07	4.42333e+07	3.88679e+07	3.19207e+07	3.02117e+07	3.17227e+07	4.03225e+07	5.31244e+07
Com_1890_neg	(±)9(10)-DiHOME	C18 H34 O4	314.246	13.643	313.238	Full match	No results	Full match	3.24316e+06	9.65423e+06	1.92558e+07	2.88997e+07	1.36948e+07	1.19587e+07	6.80461e+06	1.03604e+07	1.86589e+07	3.82274e+06	1.72008e+07	2.08093e+07	1.36251e+07	2.75327e+07	1.04331e+07	1.33368e+07	2.4416e+07	5.97811e+06	1.35933e+07	9.72051e+06	1.68128e+07	1.15728e+07	2.73494e+06	1.43388e+07	3.6353e+06	8.52386e+06	1.73763e+07	3.54531e+06	6.28747e+06	7.5328e+06	1.95105e+07	2.34709e+07	3.35376e+07	1.16598e+07	7.81974e+06	1.00065e+07	1.0973e+07	4.01383e+06	1.29382e+07	1.74105e+07	1.38484e+07
Com_18_neg	LPC 16:0	C24 H50 N O7 P	555.354	14.699	554.347	No results	Invalid mass	No results	2.06304e+09	7.3018e+09	4.38325e+09	8.59444e+09	5.75022e+09	4244547266	2.61356e+09	5.01679e+09	6.10474e+09	4.90711e+09	4.0672e+09	6.72283e+09	4.00216e+09	2.5455e+09	5.04942e+09	8.22236e+09	3.82054e+09	6.38071e+09	2.76306e+09	1.21522e+10	6.32884e+09	9.27274e+09	1.49028e+08	4.15933e+09	2.88744e+09	5.4262e+09	7.063e+09	6.94822e+09	6.4704e+09	3.63681e+09	4.41181e+09	9.51021e+09	3.21192e+09	4.70096e+09	4.93857e+09	6.19981e+09	4.10659e+09	3.03758e+09	2.17147e+09	4.38759e+09	3.46388e+09
Com_190_neg	trans-10-Heptadecenoic Acid	C17 H32 O2	286.251	14.212	285.243	Invalid mass	No results	No results	5.47616e+08	3.40776e+08	2.86821e+08	3.64159e+08	4.43921e+08	3.45753e+08	3.75129e+08	6.29243e+08	3.68938e+08	6.23145e+08	5.29622e+08	6.68249e+08	4.53832e+08	3.15809e+08	2.97505e+08	2.9232e+08	3.71323e+08	6.70006e+08	3.14442e+08	5.633e+08	3.24763e+08	3.62732e+08	4.80237e+08	4.36931e+08	4.26618e+08	2.92675e+08	3.73957e+08	4.62664e+08	3.54955e+08	3.66615e+08	4.10596e+08	3.77737e+08	6.33313e+08	3.4282e+08	3.15068e+08	3.53901e+08	4.91351e+08	5.61317e+08	4.06117e+08	3.12131e+08	4.50006e+08
Com_192_neg	8(S)-Hydroxy-(5Z,9E,11Z,14Z)-eicosatetraenoic acid	C20 H32 O3	320.235	13.181	319.228	Full match	No results	Full match	2.03107e+07	6.83699e+07	9.01301e+07	3.01043e+07	3.8954e+07	3.64637e+07	1.96532e+07	4.71345e+07	6.72656e+07	4.85363e+07	1.34632e+08	5.54067e+06	5.57421e+06	1.1572e+07	1.92319e+06	6.64363e+07	1.0555e+07	1.61793e+08	1.19664e+08	7.13185e+07	7.50542e+07	2.54209e+08	4.81873e+08	1.30566e+07	3.26383e+06	6.64389e+06	1.38048e+08	5.58127e+07	6.50797e+06	6.88778e+07	1.43998e+06	4.17423e+07	7.17268e+06	2.40682e+06	9.64439e+07	3.78006e+07	1.25299e+08	972690	2.32127e+06	3.39012e+07	2.44208e+07
Com_195_neg	5-Aminovaleric acid	C5 H11 N O2	117.079	1.466	116.072	Full match	No results	Full match	1.78235e+08	2.24449e+08	2.13223e+08	3.0993e+08	2.75985e+08	2.49284e+08	2.44412e+08	2.08666e+08	3.64741e+08	2.55331e+08	3.54243e+08	3.1798e+08	2.9517e+08	2.18352e+08	3.1121e+08	2.2988e+08	2.15433e+08	2.67481e+08	2.86581e+08	2.2982e+08	2.3484e+08	2.79285e+08	4.7843e+08	3.47123e+08	1.87923e+08	1.95002e+08	2.79616e+08	2.61861e+08	2.80404e+08	2.28743e+08	2.72214e+08	2.71104e+08	2.1143e+08	2.75921e+08	2.59612e+08	2.50745e+08	2.17351e+08	2.04947e+08	2.18212e+08	2.18738e+08	2.21839e+08
Com_1971_neg	LPC 20:2	C28 H54 N O7 P	607.386	14.985	606.379	No results	Invalid mass	No results	1.29491e+07	2.2953e+07	1.26442e+07	3.59023e+07	1.8991e+07	2.0872e+07	1.6572e+07	1.42909e+07	2.01942e+07	1.58178e+07	2.13247e+07	1.77073e+07	1.55518e+07	1.90209e+07	2.575e+07	2.59314e+07	1.38511e+07	1.91609e+07	1.65169e+07	2.94817e+07	2.13958e+07	2.3415e+07	3.47812e+06	1.31014e+07	1.37197e+07	1.89329e+07	2.08631e+07	2.582e+07	1.66375e+07	2.58454e+07	1.81619e+07	2.41242e+07	1.47268e+07	2.31606e+07	1.56022e+07	1.90473e+07	2.19636e+07	9.88534e+06	1.11636e+07	1.91446e+07	1.50668e+07
Com_197_neg	(+/-)11(12)-EET	C20 H32 O3	320.236	13.151	319.228	Full match	No results	Full match	1.97627e+07	6.66413e+07	8.76657e+07	2.95215e+07	3.8093e+07	3.52932e+07	1.91763e+07	4.58924e+07	6.52625e+07	4.71664e+07	1.30611e+08	5.29338e+06	5.36547e+06	1.12325e+07	1.64762e+06	6.51707e+07	1.03392e+07	1.56307e+08	1.16225e+08	6.93947e+07	7.30894e+07	2.46662e+08	4.67663e+08	1.26881e+07	3.03776e+06	6.08802e+06	1.34378e+08	5.469e+07	6.11635e+06	6.71873e+07	1.09884e+06	4.08545e+07	6.90063e+06	2.01121e+06	9.34186e+07	3.68864e+07	1.2144e+08	716747	1.99314e+06	3.31907e+07	2.38784e+07
Com_198_neg	Decanoic acid	C10 H20 O2	172.147	12.301	171.139	Full match	No results	Full match	1.10206e+08	1.11664e+08	1.42107e+08	1.2297e+08	2.2528e+08	1.75673e+08	2.31046e+08	1.35561e+08	1.94406e+08	1.48409e+08	9.15646e+07	2.06631e+08	1.8751e+08	1.16099e+08	9.32245e+07	2.0412e+08	1.55204e+08	7.52161e+08	1.22664e+08	9.52633e+07	9.6251e+07	1.41751e+08	4.62089e+08	1.5166e+08	1.52748e+08	1.54795e+08	5.73166e+07	6.56288e+07	8.48121e+07	1.30725e+08	1.19927e+08	7.70933e+07	1.39368e+08	1.42589e+08	6.34748e+07	3.95973e+08	1.80551e+08	1.39694e+08	1.44779e+08	1.77188e+08	3.47738e+08
Com_1992_neg	Erucic acid	C22 H42 O2	338.319	15.129	337.312	Full match	No results	Full match	2.05181e+07	2.80073e+07	2.42084e+07	2.51438e+07	3.43017e+07	3.10868e+07	3.76781e+07	3.1988e+07	1.96054e+07	3.36632e+07	4.49977e+07	3.55584e+07	2.85213e+07	2.12675e+07	2.2363e+07	2.54542e+07	2.39472e+07	2.38052e+07	2.48213e+07	2.90789e+07	1.98724e+07	2.35607e+07	2.39243e+07	2.44779e+07	3.83565e+07	2.1609e+07	2.632e+07	2.73013e+07	5.57846e+07	2.64501e+07	2.37466e+07	2.34969e+07	5.15178e+07	4.1794e+07	2.83325e+07	2.4418e+07	2.18057e+07	3.19986e+07	2.02314e+07	3.15443e+07	2.52652e+07
Com_1_neg	Elaidic acid	C18 H34 O2	282.256	14.392	281.249	Full match	No results	No results	8.28562e+10	5.90995e+10	45158791551	3.79336e+10	5.27545e+10	3.93598e+10	3.88244e+10	5.8696e+10	43200638529	6.08434e+10	5.18163e+10	6.09255e+10	7.49368e+10	4.7743e+10	4.19223e+10	3.44391e+10	3.70944e+10	4.38537e+10	4.27787e+10	7.41921e+10	4.96554e+10	36507957473	4.38136e+10	5.10315e+10	5.55357e+10	4.40688e+10	4.42385e+10	5.35027e+10	3.77303e+10	5.06421e+10	6.53938e+10	4.46032e+10	6.33206e+10	5.03328e+10	4.39741e+10	4.44701e+10	6.19227e+10	72281047930	6.07241e+10	4.66691e+10	55222239045
Com_2042_neg	1,4-Cyclohexanedicarboxylic acid	C8 H12 O4	172.074	2.472	171.067	No results	Full match	Full match	4.87094e+06	7.59721e+06	7.58454e+06	8.5735e+06	2.62903e+07	2.32843e+07	3.09178e+07	6.14542e+06	2.64752e+07	8.38603e+06	8.9672e+06	9.37005e+06	7.94133e+06	6.94055e+06	1.07945e+07	2.7623e+07	1.61189e+07	7.76555e+06	8.81767e+06	5.42273e+06	7.17173e+06	8.50916e+06	2.36205e+07	8.53466e+06	1.27382e+07	1.03714e+07	9.95556e+06	1.03906e+07	1.42142e+07	8.54084e+06	9.67986e+06	9.94815e+06	1.03934e+07	1.40939e+07	1.05136e+07	4.00889e+07	2.26148e+07	1.39976e+07	8.72675e+06	2.20396e+07	3.4203e+07
Com_205_neg	LPC 20:4	C28 H50 N O7 P	603.354	14.422	602.347	No results	Invalid mass	No results	1.42065e+08	6.53217e+08	3.00818e+08	5.77062e+08	2.73836e+08	3.09518e+08	2.65983e+08	3.21358e+08	5.56795e+08	2.92734e+08	4.94058e+08	4.84018e+08	3.03732e+08	2.89945e+08	1.23577e+08	5.568e+08	3.31648e+08	4.34406e+08	4.0373e+08	4.07691e+08	3.69797e+08	3.87538e+08	8.41603e+07	3.42525e+08	3.19497e+08	4.5286e+08	4.38267e+08	4.22808e+08	4.27086e+08	4.50677e+08	2.22768e+08	4.44938e+08	1.63466e+08	2.18128e+08	3.7808e+08	3.8432e+08	4.0609e+08	2.95047e+08	1.72952e+08	3.27545e+08	3.53511e+08
Com_2068_neg	Cer-NS (d18:1/24:1)	C42 H81 N O3	647.623	16.659	646.615	No results	Full match	No results	9.84352e+06	1.28359e+07	2.31932e+07	4.08028e+07	1.94003e+07	5.73277e+06	1.09305e+07	1.52653e+07	3.86349e+07	1.71455e+07	1.11353e+07	1.13996e+07	1.39588e+07	6.03872e+06	1.86349e+07	8.0759e+06	1.0646e+07	1.70653e+07	2.73565e+07	1.26158e+07	9.16446e+06	2.59271e+07	1.03713e+07	3.12484e+07	1.52481e+07	8.29078e+06	3.26608e+07	3.76704e+07	5.27275e+07	2.05615e+07	2.2743e+07	2.52689e+07	2.01478e+07	5.36428e+07	3.78673e+07	2.7353e+07	1.33656e+07	9.52158e+06	1.6246e+07	1.24996e+07	6.96056e+06
Com_2072_neg	LysoPE 18:0	C23 H48 N O7 P	481.316	15.998	480.309	No results	No results	Full match	1.7767e+07	2.64344e+07	1.91082e+07	3.72055e+07	2.45211e+07	2.18933e+07	1.85734e+07	1.79447e+07	3.15788e+07	2.08017e+07	3.25467e+07	2.74614e+07	1.9023e+07	2.15959e+07	2.43694e+07	3.58477e+07	2.69662e+07	2.96442e+07	2.65498e+07	3.4824e+07	3.24514e+07	4.0806e+07	3.47962e+06	2.34535e+07	1.95644e+07	2.43729e+07	3.17511e+07	2.94348e+07	2.96749e+07	3.77893e+07	1.80461e+07	3.59081e+07	1.45715e+07	2.29006e+07	2.64668e+07	2.5199e+07	2.78083e+07	1.20892e+07	1.24614e+07	2.63328e+07	1.80361e+07
Com_2096_neg	L-Pipecolate	C6 H11 N O2	129.079	1.558	128.072	No results	No results	Full match	2.45751e+07	2.56921e+07	2.19359e+07	1.88388e+07	2.32026e+07	2.07322e+07	5.19448e+07	2.43169e+07	1.17002e+07	3.30312e+06	2.18037e+07	3.22026e+07	3.7175e+07	1.85139e+07	2.75645e+07	3.32084e+07	2.02855e+07	1.37633e+07	2.04205e+07	2.14024e+07	1.35788e+07	1.35271e+07	9.65613e+06	1.43004e+07	1.8567e+07	3.76234e+07	2.13901e+07	2.2866e+07	2.71994e+07	3.70106e+07	2.17258e+07	1.66995e+07	3.16857e+07	2.64427e+07	1.78059e+07	2.04688e+07	1.30784e+07	2.45451e+07	1.73535e+07	3.04988e+07	2.76004e+07
Com_2112_neg	Estrone sulfate	C18 H22 O5 S	350.119	10.543	349.112	Full match	No results	No results	1.01455e+06	2.90063e+06	4.64437e+06	1.71039e+06	2.61775e+07	3.86394e+06	1.40849e+07	2.31969e+06	2.73088e+06	9.70402e+06	6.22375e+06	751248	9.75558e+06	7.0638e+06	6.55519e+06	1.05691e+06	8.11392e+06	3.83173e+06	2.84144e+06	532547	603445	829976	353426	3.43318e+06	1.28652e+07	7.43305e+06	4.59992e+06	6.15431e+06	2.44119e+07	6.09775e+06	974166	5.07665e+06	6.53861e+06	1.91705e+07	2.15632e+06	3.26303e+06	748713	3.98963e+07	3.44338e+06	5.38241e+06	1.73137e+06
Com_2173_neg	PC (18:0e/20:4)	C46 H86 N O7 P	855.639	15.301	854.63	No results	Invalid mass	No results	2.5581e+07	2.10325e+07	2.35851e+07	3.1704e+07	1.82141e+07	2.00994e+07	3.48124e+07	1.64693e+07	3.98005e+07	1.74511e+07	2.43823e+07	4.13771e+07	1.56271e+06	1.40625e+07	2.92548e+07	2.99176e+07	3.63014e+07	2.38125e+07	3.23927e+07	1.11188e+06	2.15037e+07	2.67998e+07	1.50385e+07	3.33407e+07	5.04772e+07	2.96349e+07	2.05087e+07	2.65013e+07	3.49119e+07	1.83535e+07	2.94155e+06	3.61192e+07	2.61902e+07	2.44897e+07	2.67107e+07	2.37006e+07	1.62293e+07	1.84352e+07	3.97826e+07	1.487e+07	4.13511e+07
Com_2175_neg	PE (18:0e/20:4)	C43 H80 N O7 P	753.562	15.416	752.555	No results	Invalid mass	No results	9.76566e+06	2.27735e+07	1.18891e+07	1.24447e+07	1.75916e+07	1.70795e+07	1.98436e+07	1.78376e+07	2.4404e+07	1.69691e+07	2.25049e+07	2.76962e+07	2.09952e+07	2.24318e+07	2.09923e+07	2.6568e+07	1.40019e+07	1.37957e+07	1.04551e+07	1.58219e+07	2.03451e+07	2.33437e+07	1.78937e+07	2.69339e+07	4.22861e+07	2.07722e+07	3.34257e+06	2.61869e+07	2.82305e+07	2.66665e+07	4.56173e+07	2.92654e+07	2.33645e+07	2.33855e+07	2.2464e+07	2.77379e+07	1.15586e+07	2.33726e+07	1.27711e+07	4.00515e+07	1.01959e+07
Com_217_neg	LPA 18:2	C21 H39 O7 P	434.243	13.836	433.236	No results	Full match	No results	8.53839e+07	1.26769e+08	2.78725e+08	4.16088e+08	3.41277e+08	1.77974e+08	3.57656e+08	1.52065e+08	1.76517e+08	2.15161e+08	1.59603e+08	1.53139e+08	1.13466e+08	4.57564e+08	3.92323e+08	1.90438e+08	1.74533e+08	4.37935e+08	3.29041e+08	4.36616e+08	6.79403e+08	6.83461e+08	7.42853e+07	1.52648e+08	3.53565e+07	5.18933e+08	3.8503e+08	3.7109e+08	1.33051e+08	5.09153e+08	1.06721e+08	3.93237e+08	1.16699e+08	4.05975e+08	2.56843e+08	4.28783e+08	1.76098e+08	6.31082e+07	6.15797e+07	1.99346e+08	1.06792e+08
Com_218_neg	cis-2-Decenoic acid	C10 H18 O2	170.131	11.745	169.124	Full match	No results	No results	1.21657e+08	1.20425e+08	1.33945e+08	8.69107e+07	1.31353e+08	6.62607e+07	7.46894e+07	1.43929e+08	6.86876e+07	1.9047e+08	9.10929e+07	1.75116e+08	3.80662e+08	1.61683e+08	5.50459e+07	7.03325e+07	6.81574e+07	8.49548e+08	8.25293e+07	4.5397e+07	9.64795e+07	8.00239e+07	3.24587e+08	1.01141e+08	7.88813e+07	1.06141e+08	6.79834e+07	5.40057e+07	7.31114e+07	1.2408e+08	9.61054e+07	4.98445e+07	1.04567e+08	5.67108e+07	5.78198e+07	9.2907e+07	1.32096e+08	9.93987e+07	3.28871e+08	5.81695e+07	1.34719e+08
Com_2192_neg	3-amino-1H-pyrazolo[4,3-c]pyridine-4,6-diol	C6 H6 N4 O2	166.048	1.158	165.04	Invalid mass	No results	No match	6.98544e+06	1.14606e+07	1.29517e+07	1.65869e+07	1.53679e+07	1.30003e+07	1.82377e+07	8.0955e+06	1.45569e+07	1.27095e+07	1.87852e+07	9.37617e+06	7.46082e+06	1.13708e+07	1.9654e+07	1.17027e+07	1.092e+07	1.50045e+07	2.24189e+07	1.64726e+07	1.09513e+07	1.55204e+07	1.91388e+07	9.70378e+06	8.39874e+06	1.0017e+07	1.61876e+07	1.37234e+07	1.15491e+07	3.69712e+07	8.55832e+06	1.52675e+07	6.38367e+06	9.97917e+06	1.22325e+07	1.31679e+07	7.23217e+06	5.29509e+06	8.88522e+06	1.16861e+07	1.16475e+07
Com_21_neg	α-Eleostearic acid	C18 H30 O2	278.225	13.866	277.217	Full match	No results	Full match	6.83267e+09	4.31547e+09	3.14148e+09	3.46882e+09	4.45013e+09	3.28419e+09	3.69764e+09	6.69605e+09	3.36377e+09	4.44246e+09	5.87084e+09	4.6468e+09	5.28708e+09	3.79021e+09	4.93924e+09	2.56991e+09	2.06969e+09	3.13015e+09	2.58763e+09	5.46192e+09	4.63311e+09	2.95893e+09	7.29298e+09	3.57159e+09	3.933e+09	2.9771e+09	3.85107e+09	4.48186e+09	2.08006e+09	5.25352e+09	3.9028e+09	3.60846e+09	4.00443e+09	2.18037e+09	2.81125e+09	4.12453e+09	5.38241e+09	5.95395e+09	6.36005e+09	1.48833e+09	4122349962
Com_220_neg	D-α-Hydroxyglutaric acid	C5 H8 O5	102.032	1.141	101.025	Invalid mass	Invalid mass	No match	1.57103e+07	3.56625e+07	2.71202e+07	4.09343e+07	7.78315e+07	7.30314e+07	6.29134e+07	3.28764e+07	8.17786e+07	3.53211e+07	6.50308e+07	4.66812e+07	3.45284e+07	1.90089e+07	6.21982e+07	7.37858e+07	5.31009e+07	3.61735e+07	3.77712e+07	3.03441e+07	3.20764e+07	2.85896e+07	4.2416e+08	4.34046e+07	3.91645e+07	4.60672e+07	4.10194e+07	2.46126e+07	5.25875e+07	2.84523e+07	4.49994e+07	3.1942e+07	3.50462e+07	4.41426e+07	3.46279e+07	1.2459e+08	6.10426e+07	5.6974e+07	3.3218e+07	6.96295e+07	7.65141e+07
Com_2215_neg	PC (16:0/22:5)	C46 H82 N O8 P	867.601	12.601	866.593	No results	Invalid mass	No results	3.92544e+06	5.81934e+06	5.52233e+06	4.52321e+07	1.88297e+07	6.27714e+06	6.36145e+06	5.77728e+06	5.39295e+06	8.55945e+06	9.467e+06	7.44864e+06	6.93329e+06	5.83337e+06	8.7325e+06	5.01435e+06	4.61751e+06	7.16065e+06	6.31847e+06	4.04756e+06	6.11469e+06	7.63059e+06	2.25207e+06	6.50556e+06	8.3273e+06	6.44351e+06	4.85499e+06	4.26942e+06	4.90905e+06	3.09662e+06	7.74308e+06	4.71001e+06	5.54841e+06	9.02968e+06	3.98551e+06	4.24598e+06	5.86243e+06	5.31018e+06	4.68319e+06	1.15654e+07	5.16817e+06
Com_2232_neg	Cer-NS (d18:1/16:0)	C34 H67 N O3	537.513	15.602	536.505	No results	Full match	No results	1.99432e+07	3.84556e+07	2.14002e+07	1.74478e+07	1.78075e+07	2.88274e+07	4.63397e+07	1.28415e+07	3.50549e+07	3.17653e+07	3.67836e+07	1.7802e+07	2.00405e+07	1.53742e+07	1.90729e+07	1.97537e+07	1.95137e+07	2.52504e+07	2.33128e+07	6.37369e+06	2.67397e+07	3.36055e+07	1.18108e+07	3.19624e+07	4.2468e+07	2.07683e+07	3.12404e+07	1.48052e+07	3.22276e+07	2.23899e+07	1.39915e+07	2.77261e+07	2.49293e+07	2.60424e+07	1.91922e+07	1.39234e+07	2.36729e+07	1.08673e+07	2.01502e+07	2.33591e+07	1.66115e+07
Com_2252_neg	Mesaconic acid	C5 H6 O4	130.027	1.327	129.02	No results	Full match	Full match	1.68207e+06	3.05138e+06	3.43835e+06	4.04801e+06	9.45392e+06	1.11419e+07	1.19091e+07	3.15655e+06	1.10325e+07	3.22109e+06	3.13151e+06	4.12758e+06	2.87313e+06	2.43601e+06	4.68781e+06	1.57265e+07	6.35909e+06	2.77907e+06	4.10898e+06	2.90716e+06	2.80452e+06	2.81321e+06	2.15686e+07	3.49992e+06	6.049e+06	3.44441e+06	4.31111e+06	4.63326e+06	6.2913e+06	3.64269e+06	4.13831e+06	4.57529e+06	5.08384e+06	5.95531e+06	4.43708e+06	1.3935e+07	1.09414e+07	6.51505e+06	4.09428e+06	9.3066e+06	1.75496e+07
Com_2272_neg	12-epi Leukotriene B4	C20 H32 O4	336.231	12.173	335.223	Full match	No results	Full match	704893	1.55613e+06	1.34748e+06	2.43111e+06	1.35973e+06	896423	1.00318e+06	927458	3.07633e+06	1.18307e+06	2.7003e+06	1.22704e+06	1.59562e+06	1.68302e+06	1.22305e+06	3.62676e+06	1.32098e+06	1.34784e+06	2.23172e+06	1.01931e+06	1.42533e+06	4.87206e+06	2.12243e+07	1.51686e+06	1.0429e+06	2.30628e+06	3.63405e+06	1.0151e+06	1.9486e+06	4.00575e+06	820919	1.44045e+06	1.07247e+06	1.18856e+07	1.02444e+06	1.54341e+06	1.51187e+06	928065	1.45725e+06	1.4875e+06	1.10153e+06
Com_2275_neg	MAG (18:3)	C21 H36 O4	352.261	13.192	351.254	No results	No results	Full match	4.84511e+06	1.34106e+07	1.90609e+07	3.18754e+07	1.00267e+07	9.55896e+06	1.34632e+07	1.60638e+07	1.71196e+07	1.31385e+07	1.40987e+07	1.89556e+07	1.85435e+07	3.53747e+07	1.79604e+07	2.41417e+07	1.58328e+07	9.38951e+06	1.70956e+07	8.35564e+06	1.95392e+07	2.49854e+07	8.45818e+06	2.32306e+07	1.84338e+07	2.60306e+07	2.0516e+07	1.28102e+07	1.48252e+07	2.48303e+07	1.45954e+07	1.59443e+07	1.50563e+07	2.34601e+07	1.22069e+07	2.89571e+07	2.0408e+07	1.32584e+07	1.74662e+07	2.00475e+07	4.93313e+06
Com_2285_neg	Perfluorooctanoic acid (PFOA)	C8 H F15 O2	413.974	12.182	412.967	Full match	No results	No results	4.06656e+06	5.61319e+06	3.63845e+06	9.32241e+06	4.11865e+06	4.7231e+06	2.16095e+06	8.24152e+06	4.59402e+06	4.08504e+07	6.92681e+06	7.46495e+06	5.5558e+06	4.95088e+06	777201	6.04327e+06	4.87861e+06	4.89204e+06	2.66524e+06	1.98294e+06	5.05755e+06	4.71483e+06	8.40452e+06	5.68234e+06	1.23288e+07	6.50449e+06	7.60094e+06	6.41144e+06	1.43589e+07	3.23617e+06	5.1822e+06	5.96367e+06	8.70874e+06	7.4202e+06	9.20785e+06	3.95784e+06	2.02294e+06	6.32478e+06	6.61926e+06	1.46765e+07	4.06083e+06
Com_2296_neg	Fumaric acid	C4 H4 O4	116.011	1.133	115.004	Full match	Full match	Full match	7.04064e+06	1.30068e+07	9.94796e+06	1.50693e+07	1.01118e+07	8.52154e+06	1.12341e+07	6.13458e+06	1.16639e+07	8.80025e+06	1.78705e+07	9.12848e+06	8.75187e+06	8.48642e+06	7.43644e+06	1.06714e+07	6.2237e+06	7.9916e+06	1.19741e+07	7.81869e+06	8.23172e+06	1.19282e+07	8.19519e+06	8.52284e+06	6.29619e+06	6.41651e+06	1.25713e+07	1.14136e+07	7.98141e+06	3.4369e+07	1.27612e+07	7.69373e+06	6.94252e+06	9.48405e+06	9.85959e+06	1.17443e+07	7.98872e+06	5.72268e+06	6.67979e+06	7.4148e+06	8.4114e+06
Com_2297_neg	OxPC (18:0-20:3+1O(1Cyc))	C46 H84 N O9 P	885.614	13.976	884.607	No results	Invalid mass	No results	2.33935e+07	2.12963e+07	1.5602e+07	1.73201e+07	1.83363e+07	1.40672e+07	1.87457e+07	2.12466e+07	1.63898e+07	2.04161e+07	1.98632e+07	1.88294e+07	2.40218e+07	1.89146e+07	2.03002e+07	1.34361e+07	1.38875e+07	1.64394e+07	1.34363e+07	2.36684e+07	1.69479e+07	1.59967e+07	2.01844e+07	1.74632e+07	1.76729e+07	1.68025e+07	1.87441e+07	2.27235e+07	1.44142e+07	2.14434e+07	2.05577e+07	1.82538e+07	2.04006e+07	1.68457e+07	1.76044e+07	1.79794e+07	2.06361e+07	2.40435e+07	2.64348e+07	1.39266e+07	2.20458e+07
Com_231_neg	L-Threonic acid	C4 H8 O5	136.037	1.158	117.02	Full match	Full match	No results	1.45908e+08	1.90826e+08	3.08174e+08	2.49224e+08	2.22127e+08	1.84796e+08	2.76734e+08	1.82561e+08	2.68854e+08	3.02178e+08	3.07076e+08	1.75505e+08	1.41715e+08	2.97488e+08	2.44071e+08	6.70643e+07	1.69138e+08	2.62694e+08	3.33652e+08	1.95125e+08	2.09004e+08	2.80178e+08	4.1159e+08	2.38395e+08	1.68061e+08	2.26735e+08	1.88685e+08	2.32327e+08	1.58583e+08	1.62658e+08	1.16119e+08	1.66943e+08	1.1534e+08	1.19446e+08	2.57764e+08	7.74941e+07	1.14853e+08	1.26279e+08	4.2419e+07	1.91375e+08	2.1047e+08
Com_2346_neg	Delta-Tridecalactone	C13 H24 O2	212.178	13.15	211.171	No results	No results	Full match	1.58914e+07	1.33655e+07	1.74875e+07	1.71057e+07	3.08459e+07	1.83918e+07	2.11147e+07	2.89608e+07	2.44543e+07	2.66229e+07	2.1532e+07	3.10238e+07	2.61636e+07	1.13221e+07	1.32855e+07	1.87693e+07	1.61851e+07	2.56419e+07	1.02413e+07	1.71684e+07	1.25047e+07	2.00009e+07	1.50009e+07	1.8591e+07	1.61056e+07	2.02748e+07	2.60502e+07	1.53351e+07	3.38717e+07	2.11896e+07	2.17553e+07	1.42589e+07	2.7527e+07	2.0482e+07	1.42536e+07	2.13032e+07	2.4986e+07	2.9986e+07	2.24386e+07	2.44494e+07	2.23638e+07
Com_2347_neg	FAHFA (18:0/18:0)	C36 H70 O4	566.528	14.6	565.521	No results	Full match	No results	2.27162e+07	7.95999e+06	4.91794e+06	4.66351e+06	8.95439e+06	3.14686e+06	6.04942e+06	2.62564e+07	6.42974e+06	8.35014e+06	7.96433e+06	1.11784e+07	1.69062e+07	6.94159e+06	8.39808e+06	4.35867e+06	4.44995e+06	6.90041e+06	4.8215e+06	1.56889e+07	1.03203e+07	6.45955e+06	1.91965e+07	8.56963e+06	1.12597e+07	8.47445e+06	8.57588e+06	1.00018e+07	3.31184e+06	5.25808e+06	9.92712e+06	3.88893e+06	1.05865e+07	6.84679e+06	4.30413e+06	5.95939e+06	8.84802e+06	1.51389e+07	7.72241e+06	4.79439e+06	6.63885e+06
Com_2358_neg	5-Methyluridine	C10 H14 N2 O6	258.086	1.152	257.078	No results	No results	Full match	274669	718413	1.30854e+06	840850	1.05102e+06	457433	1.63008e+06	534185	1.47948e+06	489734	1.47389e+06	551722	486547	767554	609182	1.09891e+06	535586	965504	1.30535e+06	578504	479414	932498	2.01136e+07	641895	242235	523787	1.32337e+06	566869	949877	669792	876364	865893	399041	670525	1.79189e+06	1.16507e+06	1.04441e+06	407276	456547	1.03033e+06	499727
Com_2362_neg	PC (17:1/18:2)	C43 H80 N O8 P	829.582	16.457	828.574	No results	Invalid mass	No results	1.03294e+07	1.283e+07	1.53703e+07	1.2592e+07	1.93964e+07	1.95031e+07	2.78923e+07	1.31683e+07	2.49593e+07	1.58697e+07	1.61831e+07	1.4877e+07	1.50678e+07	1.36938e+07	1.18785e+07	1.31338e+07	6.21878e+06	1.65706e+07	2.2157e+07	7.2582e+06	1.30478e+07	1.43534e+07	7.02723e+06	1.24e+07	1.74327e+07	1.4391e+07	2.27548e+07	2.06362e+07	2.36347e+07	2.45211e+07	1.68889e+07	2.37153e+07	1.905e+07	4.40887e+07	2.31901e+07	1.08417e+07	1.80156e+07	1.15846e+07	1.4079e+07	1.42498e+07	1.41234e+07
Com_236_neg	D-(+)-Malic acid	C4 H6 O5	134.022	1.137	133.014	Full match	Full match	Full match	5.52036e+07	9.4715e+07	9.51253e+07	9.90102e+07	8.81238e+07	5.75847e+07	7.63061e+07	5.19411e+07	1.14927e+08	7.94732e+07	2.15581e+08	5.66926e+07	6.22558e+07	5.80022e+07	5.1636e+07	7.82226e+07	4.23856e+07	6.39937e+07	9.77723e+07	9.13018e+07	6.04873e+07	1.07995e+08	3.68934e+08	5.19565e+07	3.73327e+07	5.73883e+07	1.35591e+08	1.21746e+08	6.07233e+07	6.60601e+08	1.50887e+08	6.51231e+07	4.46473e+07	5.89065e+07	8.39509e+07	9.05481e+07	6.42262e+07	5.34175e+07	3.73636e+07	4.62103e+07	6.85693e+07
Com_2398_neg	PE (18:2e/20:4)	C43 H76 N O7 P	749.536	16.134	748.528	No results	Full match	No results	5.196e+06	7.02821e+06	4.52637e+06	9.18477e+06	7.49209e+06	1.16928e+07	7.63119e+06	9.2714e+06	1.10894e+07	7.23958e+06	1.07441e+07	1.18028e+07	8.83892e+06	6.31645e+06	8.22094e+06	1.00598e+07	6.07774e+06	8.95363e+06	9.98347e+06	4.04972e+06	8.71224e+06	1.29408e+07	1.83327e+06	1.04381e+07	1.08492e+07	9.21527e+06	9.35659e+06	1.09827e+07	1.46414e+07	2.59012e+07	1.04066e+07	1.19896e+07	1.02945e+07	1.18384e+07	1.24721e+07	6.47468e+06	9.19978e+06	3.29309e+07	1.39183e+07	6.95003e+06	1.1063e+07
Com_2409_neg	L-Ascorbic acid 2-sulfate	C6 H8 O9 S	255.989	1.125	254.982	Full match	No results	No results	1.18261e+07	2.80571e+07	1.71469e+07	2.43182e+07	2.20714e+07	1.97451e+07	1.44755e+07	7.51706e+06	2.82948e+07	1.13986e+07	2.52253e+07	1.69304e+07	1.49462e+07	9.9644e+06	3.42649e+07	1.72438e+07	1.9433e+07	1.55234e+07	2.11622e+07	1.35052e+07	1.86503e+07	3.31185e+07	1.4082e+07	9.1693e+06	9.18239e+06	2.2451e+07	2.21537e+07	1.77943e+07	1.84666e+07	1.34079e+07	1.46536e+07	1.21543e+07	9.32995e+06	2.35643e+07	2.22211e+07	1.87036e+07	1.08551e+07	1.41094e+07	1.71087e+07	1.53464e+07	2.146e+07
Com_242_neg	FAHFA (18:2/20:4)	C38 H62 O4	582.463	14.123	581.456	No results	Full match	No results	4.39849e+08	1.95796e+08	9.31212e+07	1.04722e+08	1.55461e+08	9.34968e+07	1.26711e+08	2.67712e+08	1.14862e+08	1.87688e+08	1.64942e+08	1.47633e+08	2.76848e+08	1.90075e+08	1.87414e+08	6.23242e+07	6.88657e+07	1.02529e+08	6.44384e+07	3.28934e+08	1.6416e+08	9.77502e+07	2.64939e+08	1.12263e+08	1.31829e+08	1.32081e+08	9.49228e+07	1.59451e+08	5.04499e+07	2.2343e+08	1.53063e+08	1.19173e+08	1.66974e+08	9.02446e+07	9.83797e+07	1.27579e+08	2.09935e+08	2.67823e+08	2.92715e+08	5.89108e+07	2.07877e+08
Com_2516_neg	trans-2-Butene-1,4-dicarboxylic Acid	C6 H8 O4	144.042	1.255	143.035	No results	No results	Full match	1.29985e+07	1.75715e+07	2.55259e+07	1.42251e+07	2.33738e+07	2.24044e+07	2.83807e+07	1.93749e+07	2.39942e+07	2.35165e+07	2.28814e+07	3.25246e+07	2.53702e+07	1.96136e+07	2.69506e+07	2.95796e+07	2.63235e+07	2.43588e+07	2.61956e+07	1.98897e+07	1.86914e+07	2.79096e+07	1.27568e+07	3.07192e+07	2.6576e+07	3.04134e+07	2.32699e+07	2.27823e+07	3.29449e+07	1.86731e+07	2.44552e+07	2.62669e+07	2.35985e+07	3.12416e+07	2.4956e+07	2.85964e+07	1.94317e+07	2.2861e+07	2.12879e+07	2.46656e+07	2.13657e+07
Com_255_neg	FAHFA (18:1/20:3)	C38 H66 O4	586.494	14.394	585.487	No results	Full match	No results	4.27761e+08	2.39241e+08	1.08996e+08	7.65359e+07	2.00448e+08	1.15795e+08	9.38601e+07	2.36346e+08	1.27255e+08	2.5671e+08	1.59765e+08	2.14993e+08	3.51608e+08	1.35829e+08	9.55082e+07	7.92379e+07	9.38983e+07	5.96936e+07	8.63953e+07	3.73315e+08	1.46383e+08	9.29283e+07	1.99984e+08	1.5729e+08	1.94681e+08	1.16149e+08	1.00817e+08	1.55841e+08	7.48943e+07	1.64651e+08	2.05998e+08	1.14952e+08	2.23721e+08	1.38457e+08	1.08202e+08	1.15973e+08	2.27407e+08	2.76551e+08	2.28918e+08	1.22332e+08	1.79945e+08
Com_2572_neg	9-HpOTrE	C18 H30 O4	310.215	12.034	309.207	No results	No results	Full match	1.2088e+07	8.95174e+06	1.4337e+07	1.41417e+07	1.69468e+07	8.52861e+06	2.48686e+07	1.0567e+07	1.53302e+07	1.93454e+07	8.93249e+06	2.01682e+07	1.618e+07	2.1285e+07	1.37422e+07	1.85735e+07	6.88672e+06	6.66992e+06	8.66611e+06	7.41522e+06	1.09317e+07	2.07255e+07	7.25859e+06	1.93164e+07	2.58788e+07	1.55165e+07	1.19644e+07	9.36208e+06	1.00595e+07	2.41103e+07	8.78795e+06	1.7075e+07	7.82486e+06	3.39175e+07	8.09049e+06	2.12979e+07	1.07104e+07	8.00945e+06	1.26633e+07	7.18494e+06	8.31014e+06
Com_2591_neg	2-(Dimethylamino)Guanosine	C12 H17 N5 O5	311.122	1.545	310.115	No results	No results	Full match	263537	494985	566232	538576	529169	604943	637881	510881	694227	585608	639599	580359	482100	457428	462680	508085	505193	532735	617405	437699	356287	747764	1.68882e+07	529164	624717	478053	364203	362965	527601	581712	469378	480993	497493	585321	604196	505848	313349	401731	427736	565983	537691
Com_2593_neg	PC (18:0/22:6)	C48 H84 N O8 P	893.616	16.778	892.609	No results	Invalid mass	No results	1.13894e+07	2.00638e+07	2.21394e+07	1.91855e+07	1.87439e+07	2.08286e+07	2.45792e+07	1.68113e+07	2.04527e+07	2.25541e+07	2.25317e+07	1.48025e+07	2.04878e+07	1.60228e+07	1.81227e+07	2.26203e+07	1.48805e+07	2.1255e+07	2.73943e+07	1.63248e+07	1.97147e+07	2.1123e+07	9.41621e+06	1.40918e+07	2.49188e+07	1.77835e+07	2.43515e+07	2.00917e+07	2.47272e+07	2.06314e+07	2.84998e+07	2.23063e+07	2.05388e+07	4.51673e+06	2.85071e+07	2.31915e+07	1.70256e+07	1.41433e+07	1.59304e+07	2.3947e+07	1.91666e+07
Com_2602_neg	3,8,9-trihydroxy-10-propyl-3,4,5,8,9,10-hexahydro-2H-oxecin-2-one	C12 H20 O5	244.131	8.884	243.124	Full match	No results	No results	287844	443303	406367	441868	9.94599e+06	9.26721e+06	1.10823e+07	338238	6.49191e+06	446990	495790	449619	503934	312962	1.64213e+06	1.16374e+07	5.21133e+06	438592	497067	291230	325196	449082	1.67568e+07	429869	3.29586e+06	1.36298e+06	489113	642933	735900	506614	732636	507674	434054	1.58e+06	509790	1.19459e+07	8.87243e+06	2.38985e+06	1.26424e+06	6.74449e+06	7.57029e+06
Com_2611_neg	PC (18:1/22:6)	C48 H82 N O8 P	891.601	16.701	890.594	No results	Invalid mass	No results	1.04056e+07	1.45453e+07	1.39563e+07	1.20179e+07	1.37103e+07	2.93035e+07	2.13113e+07	1.16734e+07	1.63238e+07	1.37721e+07	1.60783e+07	1.38491e+07	1.6806e+07	1.33589e+07	1.49813e+07	1.52926e+07	1.25452e+07	1.81088e+07	1.85616e+07	7.36433e+06	1.34855e+07	1.48763e+07	7.79355e+06	8.2718e+06	1.80647e+07	1.49013e+07	1.83226e+07	1.50847e+07	2.83369e+07	1.84615e+07	1.59861e+07	1.95284e+07	1.29382e+07	2.79188e+07	2.11182e+07	1.37277e+07	1.44543e+07	1.0327e+07	1.4626e+07	1.38884e+07	1.45003e+07
Com_2619_neg	SM (d14:1/25:0)	C44 H89 N2 O6 P	832.669	16.593	831.662	No results	Invalid mass	No results	3.65321e+06	9.52305e+06	1.61985e+07	2.12336e+07	7.93555e+06	8.35223e+06	1.56123e+07	1.94068e+07	1.5621e+07	2.29557e+06	1.69729e+07	1.89075e+07	1.31354e+07	6.16573e+06	1.12607e+07	1.04976e+07	1.01833e+07	1.49677e+07	1.4076e+07	9.67854e+06	4.74082e+06	1.7597e+07	8.29539e+06	1.67791e+07	1.50957e+07	1.1597e+07	2.33941e+07	2.77762e+07	2.81111e+07	1.24985e+07	2.25691e+07	3.35461e+07	1.74988e+07	2.39402e+07	1.93212e+07	1.28915e+07	1.01889e+06	8.64099e+06	1.42016e+07	1.20771e+07	1.03693e+07
Com_2627_neg	Taurochenodeoxycholic Acid (sodium salt)	C26 H45 N O6 S	499.297	12.668	498.29	Full match	No results	No results	1.05337e+06	504086	7.23334e+06	1.50379e+06	8.35391e+06	4.43686e+06	5.36715e+06	1.88281e+06	6.41709e+06	4.00825e+06	6.41723e+06	3.27886e+06	3.17568e+06	4.46159e+06	3.53793e+06	3.90282e+06	7.75818e+06	4.01925e+06	2.47043e+06	3.51847e+06	879988	2.8146e+06	7.82668e+06	2.22828e+07	3.61491e+06	5.83596e+06	4.37249e+06	2.55281e+06	2.15763e+07	1.80195e+06	2.32846e+07	1.04977e+07	2.44512e+06	2.60485e+07	1.78494e+06	2.94983e+06	8.35634e+06	2.80703e+06	1.47936e+06	4.67769e+06	3.03543e+07
Com_2631_neg	LPE 22:5	C27 H46 N O7 P	527.302	14.507	526.295	No results	Full match	No results	4.24901e+06	1.42561e+07	8.58826e+06	1.50412e+07	7.96343e+06	1.82151e+07	4.99339e+06	2.35862e+07	8.94057e+06	7.48239e+06	1.36594e+07	9.69035e+06	6.943e+06	4.67835e+06	6.33565e+06	1.49865e+07	1.25263e+07	9.09766e+06	8.76325e+06	1.1327e+07	1.02035e+07	1.20117e+07	1.33428e+06	2.04871e+07	1.66651e+07	1.11534e+07	9.34669e+06	7.50584e+06	1.23472e+07	8.78598e+06	1.02002e+07	1.86675e+07	7.58021e+06	9.42757e+06	5.7452e+06	5.71069e+06	8.43005e+06	1.82382e+07	6.34967e+06	1.07503e+07	1.49451e+07
Com_2640_neg	FAHFA (18:1/14:1)	C32 H58 O4	506.434	14.666	505.427	No results	Full match	No results	6.58882e+06	1.4609e+07	1.43553e+07	1.48901e+07	1.02387e+07	8.24587e+06	8.42185e+06	8.25712e+06	1.18675e+07	2.32821e+07	1.04903e+07	1.20629e+07	1.85622e+07	2.68384e+07	7.04118e+06	1.76137e+07	2.37318e+07	1.43798e+07	1.53634e+07	8.99782e+06	1.1005e+07	2.69653e+07	5.84927e+06	1.47167e+07	1.93141e+07	1.72515e+07	9.371e+06	1.53217e+07	1.34912e+07	1.18422e+07	3.15417e+07	1.43347e+07	1.79779e+07	1.45794e+07	1.68505e+07	9.97112e+06	1.68102e+07	9.73327e+06	1.1548e+07	1.37708e+07	1.0337e+07
Com_2646_neg	PC (18:1e/18:2)	C44 H84 N O7 P	829.622	16.128	828.614	No results	Invalid mass	No results	7.86108e+06	1.57386e+07	1.23343e+07	1.31774e+07	5.70429e+06	1.83944e+07	1.9501e+07	1.35203e+07	1.98468e+07	2.16517e+07	1.75623e+07	1.93059e+07	1.11425e+07	1.74306e+07	1.74839e+07	1.87696e+07	2.5696e+07	1.62222e+07	1.79847e+07	1.13574e+07	1.31885e+07	1.95887e+07	1.2657e+07	3.00866e+07	1.98884e+07	1.89115e+07	2.49649e+07	2.71477e+07	2.42078e+07	1.19706e+07	2.71039e+07	2.98686e+07	2.08708e+07	2.21511e+07	3.09469e+07	2.5058e+07	9.46369e+06	1.90869e+07	1.49833e+07	3.77058e+06	1.34911e+07
Com_2664_neg	11-keto Testosterone (CRM)	C19 H26 O3	348.194	10.703	347.186	Invalid mass	No results	No results	1.4861e+06	3.37936e+06	2.04186e+06	2.613e+06	6.27781e+06	2.98996e+06	3.69918e+06	2.2349e+06	2.86216e+06	2.13251e+06	1.35476e+06	2.35618e+06	4.31737e+06	2.55554e+06	1.66883e+06	1.13145e+06	5.4386e+06	2.29375e+06	2.01478e+06	2.02213e+06	2.07921e+06	2.74135e+06	1.13404e+06	2.44681e+06	2.10959e+06	1.88275e+06	1.53507e+06	2.27685e+06	4.30382e+07	1.73023e+06	2.90543e+06	2.44597e+06	3.23133e+06	3.24542e+06	2.60426e+06	1.84446e+06	1.32828e+06	1.74076e+06	2.21877e+06	4.29032e+06	3.52024e+06
Com_2666_neg	LPI 18:1	C27 H51 O12 P	598.313	13.997	597.305	No results	Full match	No results	2.09301e+06	1.05098e+07	7.8784e+06	6.71275e+06	2.8059e+07	9.96481e+06	5.67587e+06	8.52177e+06	2.15956e+07	4.60083e+06	9.12669e+06	1.07714e+07	1.96502e+07	4.39012e+06	5.13687e+06	8.1042e+06	6.99643e+06	1.08748e+07	7.56628e+06	1.4553e+07	1.1238e+07	1.22682e+07	2.67927e+06	3.06394e+07	9.03494e+06	8.3604e+06	7.01847e+06	7.44999e+06	2.38043e+07	8.95556e+06	1.10522e+07	1.10794e+07	7.00334e+06	1.53856e+07	5.65409e+06	2.12704e+07	6.02809e+06	4.87355e+06	8.24889e+06	1.40538e+07	5.72039e+06
Com_266_neg	LPA 20:4	C23 H39 O7 P	458.244	13.81	457.236	No results	Full match	No results	2.10546e+08	2.30209e+08	2.53263e+08	2.11053e+08	2.65357e+08	1.35009e+08	3.0811e+08	2.20429e+08	3.0778e+08	2.05569e+08	1.91016e+08	6.61048e+07	4.15305e+07	3.50005e+08	2.43383e+08	1.58077e+08	8.48626e+07	4.9082e+08	3.52002e+08	2.30463e+08	2.65342e+08	3.29408e+08	2.85344e+08	7.53139e+07	2.24068e+07	3.90206e+08	2.70234e+08	2.32199e+08	6.38789e+07	2.1493e+08	4.17454e+07	2.26096e+08	7.50202e+07	1.56582e+08	4.14522e+08	2.0677e+08	2.65529e+08	4.3386e+07	1.86815e+07	1.8422e+08	9.11997e+07
Com_2670_neg	PC (15:0/18:2)	C41 H78 N O8 P	803.569	15.903	802.562	No results	Invalid mass	No results	9.48277e+06	1.5249e+07	1.5443e+07	1.64854e+07	751212	1.44058e+07	2.51409e+07	1.80269e+07	1.59629e+07	1.48253e+07	1.80284e+07	1.64037e+07	9.43392e+06	2.28403e+07	1.60413e+07	1.51595e+07	1.97726e+07	1.41145e+07	1.66667e+07	9.91162e+06	1.50208e+07	1.43666e+07	7.14903e+06	1.5704e+07	1.20732e+07	1.32992e+07	3.32174e+07	2.01195e+07	1.84996e+07	1.52863e+07	2.95373e+07	1.9049e+07	2.22288e+07	2.61629e+07	2.34313e+07	2.55962e+07	1.32734e+07	1.64634e+07	1.19253e+07	1.93298e+07	1.55983e+07
Com_267_neg	FAHFA (16:0/18:0)	C34 H66 O4	538.497	14.359	537.489	No results	Full match	No results	4.11025e+08	1.38682e+08	1.06284e+08	7.55324e+07	1.57966e+08	7.77062e+07	8.62096e+07	3.17241e+08	6.42149e+07	2.14738e+08	1.0976e+08	1.13664e+08	1.81432e+08	1.07222e+08	1.39799e+08	5.56867e+07	8.64222e+07	1.15008e+08	7.02744e+07	3.66226e+08	1.51695e+08	1.076e+08	2.49611e+08	1.16142e+08	1.16915e+08	1.13923e+08	6.23353e+07	9.58279e+07	3.5567e+07	9.04636e+07	1.1631e+08	9.00396e+07	1.07197e+08	9.15743e+07	6.21132e+07	6.48262e+07	1.41454e+08	2.02056e+08	9.18444e+07	5.33696e+07	1.13049e+08
Com_2680_neg	19(R)-hydroxy Prostaglandin A2	C20 H30 O5	332.2	10.954	331.193	Invalid mass	No results	No results	5.46152e+06	8.32019e+06	5.22437e+06	5.44746e+06	2.77576e+07	1.89364e+07	1.40608e+07	4.50954e+06	1.10104e+07	9.44758e+06	2.8133e+06	4.61227e+06	5.20975e+06	5.59036e+06	4.69324e+06	2.53239e+07	1.66406e+07	6.74138e+06	5.44948e+06	4.16667e+06	4.80983e+06	4.4319e+06	3.51546e+06	7.82607e+06	1.08167e+07	9.19404e+06	1.5852e+06	3.51038e+06	1.57623e+07	3.1506e+06	4.19745e+06	5.57651e+06	182417	1.6242e+07	7.66389e+06	8.56178e+06	1.11722e+07	3.4425e+06	2.38605e+06	1.24691e+07	1.08079e+07
Com_2687_neg	FAHFA (20:4/14:1)	C34 H56 O4	528.418	14.5	527.411	No results	Full match	No results	5.81578e+06	1.03676e+07	1.39113e+07	2.84483e+07	4.5582e+06	1.21213e+07	9.42115e+06	9.8435e+06	7.36759e+06	1.67871e+07	1.18115e+07	1.05159e+07	2.33493e+07	1.33957e+07	1.42117e+07	2.32943e+07	1.00008e+07	1.56797e+07	1.26664e+07	8.51017e+06	1.37427e+07	1.27794e+07	7.61242e+06	2.31508e+07	1.76485e+07	1.71063e+07	1.56068e+07	1.24604e+07	9.09675e+06	1.18394e+07	2.5026e+07	1.01177e+07	1.64594e+07	7.47365e+06	1.15816e+07	6.93778e+06	1.59073e+07	8.06266e+06	2.80883e+07	8.84804e+06	4.55594e+06
Com_2702_neg	3-Hydroxydecanoic acid	C10 H20 O3	188.142	9.418	187.134	Full match	No results	Full match	1.44011e+06	2.44192e+06	2.37197e+06	2.98615e+06	6.63326e+06	6.6668e+06	9.7299e+06	1.93233e+06	5.9393e+06	2.54305e+06	3.0298e+06	2.75273e+06	2.3893e+06	2.18778e+06	3.17272e+06	7.93494e+06	4.40007e+06	2.87861e+06	2.9598e+06	1.98569e+06	2.24419e+06	2.60739e+06	1.55663e+07	2.85293e+06	3.30474e+06	2.87115e+06	2.95135e+06	2.81127e+06	3.26329e+06	2.40598e+06	2.45561e+06	2.61375e+06	2.66684e+06	3.04944e+06	2.88312e+06	8.64654e+06	5.91403e+06	3.36898e+06	2.70001e+06	6.73415e+06	5.57483e+06
Com_2711_neg	Cyclo(glycyltryptophylprolylglycylvalylglycyl-β-hydroxytyrosyl)	C36 H44 N8 O9	732.324	7.647	731.317	Full match	No results	No results	200214	3.56689e+06	725363	245448	1.65339e+06	1.83718e+06	414176	1.11091e+06	674423	760545	810514	2.79171e+06	1.86221e+06	342446	45237.1	3.06126e+06	813118	600143	1.2168e+06	750833	1.66634e+06	688330	27271.6	1.22232e+06	3.47113e+07	184175	536269	569952	6.40787e+06	379470	6.47576e+06	1.2171e+06	2.01923e+06	1.28277e+06	1.56237e+06	652425	1.30324e+06	1.37072e+06	3.06234e+06	1.26848e+06	1.57304e+06
Com_2770_neg	L-Ascorbate	C6 H8 O6	176.032	1.407	175.025	No results	No results	Full match	3.72704e+06	4.13177e+06	4.75792e+06	1.7985e+07	1.22994e+07	8.16444e+06	5.50812e+06	1.29105e+07	9.85095e+06	7.53152e+06	1.04378e+07	3.27954e+07	2.3262e+07	5.49073e+06	5.93061e+06	8.98795e+06	8.26073e+06	4.89149e+06	7.44629e+06	7.07096e+06	5.51699e+06	6.03699e+06	7.46209e+06	1.10857e+07	2.79509e+07	4.44185e+06	1.21933e+07	5.95848e+06	1.45351e+07	4.96257e+06	2.64561e+07	7.28285e+06	2.87169e+07	5.45663e+06	8.86723e+06	6.95013e+06	4.21186e+06	5.62506e+06	1.22039e+07	2.28763e+07	1.85939e+07
Com_2773_neg	10-Hydroxydecanoic acid	C10 H20 O3	188.142	10.124	187.134	Full match	No results	Full match	780953	1.02914e+06	1.13352e+06	1.23197e+06	1.40667e+07	1.42088e+07	1.69573e+07	822040	1.45235e+07	1.06306e+06	1.32556e+06	1.18663e+06	1.28836e+06	934257	3.99459e+06	1.53981e+07	5.80041e+06	1.17113e+06	1.34741e+06	866551	976427	1.32289e+06	1.49358e+07	1.31518e+06	4.11498e+06	3.25758e+06	1.24941e+06	1.31848e+06	1.60114e+06	1.11163e+06	1.06896e+06	1.05263e+06	1.08497e+06	3.09835e+06	1.22915e+06	1.87517e+07	1.3046e+07	4.72973e+06	2.20277e+06	9.91894e+06	1.01141e+07
Com_2775_neg	PE (18:1e/22:6)	C45 H78 N O7 P	775.552	16.53	774.545	No results	Full match	No results	6.42243e+06	8.3232e+06	7.1557e+06	9.12071e+06	8.66239e+06	1.46712e+07	1.33268e+07	8.32701e+06	1.5227e+07	8.93058e+06	8.71743e+06	9.80452e+06	1.01261e+07	5.45039e+06	9.50296e+06	9.37978e+06	7.29012e+06	8.32102e+06	1.23246e+07	5.8029e+06	8.94297e+06	1.56618e+07	5.22803e+06	7.98443e+06	1.50453e+07	1.07489e+07	1.40794e+07	6.81876e+06	1.3509e+07	2.04114e+07	1.32719e+07	1.03856e+07	1.03231e+07	8.98503e+06	3.38308e+07	6.50673e+06	8.76964e+06	949005	1.17716e+07	6.39559e+06	6.52069e+06
Com_2783_neg	Sebacic acid	C10 H18 O4	202.121	9.95	201.114	No results	No results	Full match	3.78335e+06	5.48513e+06	8.16637e+06	1.21874e+07	2.52248e+07	2.40104e+07	1.54362e+07	7.48207e+06	1.81493e+07	1.11535e+07	9.81e+06	5.33522e+06	4.98833e+06	8.73699e+06	4.30733e+06	3.04453e+07	1.36699e+07	1.29518e+07	1.01493e+07	7.36863e+06	1.07996e+07	9.51409e+06	4.14348e+06	5.51763e+06	1.00555e+07	4.42289e+06	8.03483e+06	8.50028e+06	8.08952e+06	1.02987e+07	5.61298e+06	8.2462e+06	5.23395e+06	6.50699e+06	8.73224e+06	1.61527e+07	1.84149e+07	8.59193e+06	6.13042e+06	2.13863e+07	1.6688e+07
Com_2801_neg	PC (18:1e/16:0)	C42 H84 N O7 P	805.621	15.318	804.614	No results	Invalid mass	No results	5.82522e+06	8.55231e+06	1.21383e+07	1.35423e+07	8.28964e+06	1.01849e+07	1.13522e+07	8.44427e+06	1.95469e+07	1.10496e+07	9.34434e+06	1.78081e+07	1.46534e+07	5.49773e+06	1.0752e+07	1.69791e+07	1.42658e+07	1.25293e+07	1.61806e+07	1.02875e+07	5.35763e+06	1.14798e+06	6.07961e+06	1.37851e+07	2.16335e+07	8.97516e+06	1.33962e+07	1.23985e+07	1.58508e+07	9.15039e+06	8.05343e+06	1.12339e+07	1.05241e+07	8.00107e+06	1.02651e+07	9.81288e+06	8.68167e+06	8.35906e+06	2.62486e+07	1.07084e+07	1.73795e+07
Com_2815_neg	β-D-Glucopyranuronic acid	C6 H10 O7	194.043	1.147	193.036	Full match	Full match	Full match	1.13059e+07	1.79726e+07	1.90102e+07	1.82709e+07	2.04741e+07	1.64852e+07	2.53458e+07	1.11754e+07	1.94897e+07	1.4431e+07	2.39828e+07	1.43714e+07	1.15942e+07	1.29272e+07	2.57622e+07	1.22804e+07	1.10595e+07	1.71694e+07	1.91996e+07	9.64976e+06	1.32313e+07	1.90743e+07	7.28439e+06	2.57113e+07	2.18401e+07	1.58328e+07	1.91159e+07	1.50853e+07	2.11229e+07	1.35163e+07	1.58568e+07	1.41178e+07	1.33922e+07	1.50643e+07	1.59233e+07	2.04027e+07	1.09892e+07	1.17619e+07	1.23646e+07	1.26747e+07	1.09633e+07
Com_2830_neg	PEtOH (16:1-18:2)	C39 H71 O8 P	698.491	13.689	697.484	No results	Full match	No results	1.13915e+07	1.99278e+07	2.2457e+07	2.3134e+07	1.64303e+07	1.73972e+07	2.62859e+07	1.53856e+07	1.44482e+07	1.57868e+07	2.26012e+07	2.79479e+07	1.77534e+07	2.00868e+07	1.97581e+07	2.36592e+07	2.11722e+07	2.26145e+07	1.99416e+07	1.00786e+07	2.20851e+07	2.74814e+07	9.78286e+06	1.88818e+07	9.48199e+06	1.95219e+07	1.22176e+07	1.44664e+07	1.23371e+07	1.01216e+07	1.80201e+07	1.56615e+07	1.80415e+07	1.49977e+07	1.65707e+07	1.6455e+07	1.08715e+07	1.26704e+07	1.28114e+07	1.70616e+07	1.74028e+07
Com_2867_neg	Corticosterone	C21 H30 O4	346.218	11.721	345.211	Invalid mass	No results	No results	94892.5	157900	141892	169061	2.29246e+06	2.63457e+06	1.92205e+06	164880	1.69531e+06	155276	159500	180683	167478	1.219e+06	216168	3.0093e+06	1.39456e+06	1.05063e+06	704782	529437	824730	798231	1.41523e+07	168837	578493	135106	198298	193173	245028	153500	179417	251119	179886	199418	651666	2.11757e+06	1.46396e+06	335999	152794	1.75475e+06	1.16377e+06
Com_2877_neg	Uridine	C9 H12 N2 O6	244.07	1.993	243.062	Full match	Full match	Full match	1.13281e+07	1.80019e+07	1.65189e+07	2.13557e+07	1.74332e+07	1.27678e+07	1.3757e+07	1.6771e+07	2.70657e+07	1.62732e+07	2.48389e+07	1.82288e+07	1.70609e+07	1.38551e+07	1.32857e+07	1.59578e+07	1.08789e+07	1.60125e+07	1.91328e+07	1.35708e+07	1.84128e+07	2.04663e+07	1.01858e+06	1.38723e+07	1.67125e+07	1.38384e+07	2.53556e+07	1.88967e+07	2.55246e+07	2.17371e+07	1.81284e+07	1.98591e+07	1.39508e+07	1.59605e+07	2.45e+07	2.00163e+07	1.34828e+07	1.3416e+07	1.28422e+07	1.34346e+07	1.85168e+07
Com_287_neg	2-Mercaptobenzothiazole	C7 H5 N S2	166.987	9.94	165.979	Full match	No results	No results	4.37746e+06	8.26876e+06	1.92635e+08	2.39837e+08	9.62366e+06	1.5745e+07	6.34927e+06	1.44049e+08	2.96452e+08	2.75192e+08	3.2646e+08	4.02171e+06	3.26806e+06	8.94063e+06	2.97896e+06	2.36081e+07	5.63376e+06	2.67323e+07	1.53883e+07	7.1235e+06	1.88353e+07	1.2132e+07	1.40967e+06	3.98255e+06	5.35147e+06	1.93166e+06	1.83099e+08	2.90155e+08	7.23845e+06	4.39363e+08	5.26278e+06	2.95698e+08	5.22883e+06	5.05054e+06	1.34889e+07	1.02321e+07	1.32712e+07	3.45773e+06	4.08767e+06	9.89632e+06	1.53208e+07
Com_28_neg	PC (16:0/18:2)	C42 H80 N O8 P	817.584	14.14	816.577	No results	Invalid mass	No results	3.75088e+09	6.31988e+09	6.06009e+09	7.19849e+09	6.42473e+09	6.61923e+09	1.00367e+10	6.68314e+09	6.61836e+09	6.34026e+09	8.50572e+09	9.0427e+09	4.89135e+09	6.01348e+09	7.46696e+09	7.50853e+09	8.38455e+09	7.17081e+09	7.98335e+09	3.28739e+09	7.15072e+09	7.29204e+09	3.01792e+09	8.31798e+09	7.18687e+09	6.50563e+09	7.63888e+09	6.33313e+09	7.71567e+09	6.20368e+09	8.82758e+09	6.25068e+09	7.60278e+09	9.07264e+09	8.01926e+09	6.84307e+09	4.86192e+09	5.54588e+09	4.63628e+09	1.00775e+10	7.03983e+09
Com_2900_neg	LPE 20:3	C25 H46 N O7 P	503.302	14.491	502.296	No results	Full match	No results	2.1726e+06	1.29806e+07	3.608e+06	1.20597e+07	6.95887e+06	1.45262e+07	3.87943e+06	1.09276e+07	9.49222e+06	3.02785e+06	6.21412e+06	9.13769e+06	7.17159e+06	2.46094e+06	3.49636e+06	1.46328e+07	1.31702e+07	3.30278e+06	3.60615e+06	1.99509e+07	4.95122e+06	9.36642e+06	1.15295e+06	2.93073e+06	1.84652e+07	2.90994e+06	7.63276e+06	2.59847e+06	6.33889e+06	6.63278e+06	1.09261e+07	2.35033e+07	6.09776e+06	4.87081e+06	2.99216e+06	7.21533e+06	3.9885e+06	5.32838e+06	5.80851e+06	6.10323e+06	4.6031e+06
Com_2911_neg	12-Hydroxydodecanoic acid	C12 H24 O3	216.173	12.019	215.166	Full match	No results	No results	893986	3.4468e+06	2.62688e+06	3.98186e+06	1.25383e+07	1.43534e+07	1.78017e+07	3.16538e+06	1.49583e+07	2.1933e+06	1.7955e+06	2.35394e+06	1.71e+06	2.03569e+06	3.02144e+06	1.4195e+07	6.73278e+06	2.73791e+06	2.22293e+06	1.7119e+06	2.63927e+06	2.33037e+06	1.32237e+07	1.90148e+06	3.92745e+06	1.92369e+06	2.09204e+06	2.27381e+06	2.97782e+06	2.78081e+06	1.39419e+06	1.81611e+06	1.74412e+06	2.21039e+06	2.4602e+06	1.55917e+07	1.09228e+07	3.61926e+06	1.88399e+06	1.36387e+07	7.55927e+06
Com_291_neg	Tretinoin	C20 H28 O2	300.209	13.834	299.202	Full match	No results	Full match	2.23874e+07	3.35005e+07	3.44762e+07	4.12469e+07	1.90791e+07	3.52667e+07	3.90748e+07	2.57195e+07	3.63201e+07	3.42396e+07	4.12958e+07	3.75905e+07	3.25201e+07	3.1445e+07	3.11296e+07	4.43774e+07	3.83127e+07	3.8026e+07	4.52474e+07	2.79973e+07	3.07331e+07	3.81902e+07	1.95709e+07	3.69691e+07	3.45259e+07	2.66555e+07	4.25269e+07	4.19927e+07	5.48112e+07	3.14967e+07	3.38754e+07	4.01755e+07	3.98826e+07	3.43591e+07	4.34633e+07	3.51884e+07	3.33351e+07	3.36856e+07	3.424e+07	7.40449e+08	3.54118e+07
Com_2920_neg	PC (15:0/22:6)	C45 H78 N O8 P	851.566	15.7	850.56	No results	Invalid mass	No results	3.075e+06	1.49823e+07	8.86881e+06	1.37542e+07	1.24409e+06	1.85574e+07	2.0161e+06	9.62127e+06	1.11402e+07	8.91817e+06	9.38407e+06	1.34437e+07	826988	8.69253e+06	2.92612e+06	1.06121e+07	1.88512e+07	1.46767e+07	1.28455e+07	7.18644e+06	7.68872e+06	1.45895e+07	3.38799e+06	1.34494e+07	2.24673e+07	6.51116e+06	1.01691e+07	9.81082e+06	2.30149e+07	1.24651e+07	1.51656e+07	1.43457e+07	8.58163e+06	1.69404e+07	1.05533e+07	5.38848e+06	7.97229e+06	9.21727e+06	9.73653e+06	9.76638e+06	1.53017e+07
Com_2938_neg	PC (18:0/22:5)	C48 H86 N O8 P	895.629	15.851	894.622	No results	Invalid mass	No results	8.6075e+06	1.64745e+07	1.5556e+07	2.19298e+07	1.61641e+07	1.45691e+07	1.80112e+07	1.48487e+07	1.36634e+07	1.54864e+07	1.75128e+07	1.99779e+07	1.50859e+07	1.14636e+07	1.73326e+07	1.60869e+07	1.91298e+07	1.81448e+07	2.22658e+07	1.44986e+07	1.57712e+07	1.88214e+07	5.52902e+06	1.52398e+07	1.93544e+07	1.31348e+07	1.68348e+07	1.79551e+07	1.18106e+07	1.28217e+07	2.14441e+07	1.14228e+07	1.49971e+07	1.65622e+07	1.83088e+07	1.49537e+07	9.00401e+06	1.28308e+07	1.02217e+07	1.89262e+07	1.79579e+07
Com_2989_neg	Lithocholic Acid	C24 H40 O3	376.298	13.213	375.291	Full match	No results	Full match	147467	213233	6.21882e+06	1.98748e+06	619673	1.11323e+06	4.09394e+06	1.32197e+06	958065	1.45201e+06	2.43379e+06	1.59427e+06	1.77955e+06	1.84417e+06	1.45276e+06	241536	2.63828e+07	1.22918e+06	1.74525e+06	482415	179928	3.83018e+06	131629	1.0876e+06	3.67278e+06	725653	4.3175e+06	334880	1.1893e+06	2.38315e+06	682018	1.92804e+06	1.80019e+06	3.59875e+06	8.21755e+06	503299	5.41093e+06	232338	7.38782e+06	306499	1.41887e+06
Com_3023_neg	2-Butoxyacetic acid	C6 H12 O3	132.079	1.155	131.072	Full match	Full match	Full match	1.60758e+06	2.64076e+06	2.50211e+06	3.02481e+06	3.11113e+06	2.64502e+06	3.68833e+06	2.39994e+06	3.02728e+06	2.86022e+06	3.0582e+06	2.83436e+06	2.66127e+06	2.26771e+06	3.17983e+06	3.19572e+06	2.73182e+06	3.20981e+06	3.56191e+06	2.0819e+06	2.18346e+06	2.82218e+06	1.30117e+07	3.13453e+06	3.17436e+06	2.8479e+06	2.43192e+06	2.473e+06	2.92014e+06	2.11833e+06	2.60356e+06	2.26252e+06	2.28648e+06	2.72838e+06	2.56446e+06	3.58898e+06	2.58197e+06	2.30022e+06	2.40243e+06	3.94193e+06	2.82124e+06
Com_3028_neg	Asp-glu	C9 H14 N2 O7	262.08	1.142	261.073	No results	No results	Full match	417269	603867	694184	1.05159e+06	661285	484044	1.1521e+06	402268	1.52713e+06	712781	1.86355e+06	321449	357550	713310	685383	740541	298979	932645	1.45535e+06	614220	692366	1.25654e+06	1.29657e+07	491223	468926	413794	1.1795e+06	2.3665e+06	946434	718614	750972	802914	648920	805268	1.24114e+06	871599	625046	472929	381251	540793	639535
Com_303_neg	Dodecanedioic acid	C12 H22 O4	230.152	9.372	229.145	Full match	No results	No results	5.34349e+06	4.38807e+06	3.18126e+06	3.62682e+06	4.19221e+07	3.07945e+07	7.88075e+07	2.68537e+06	3.33851e+07	3.56769e+06	4.16597e+06	4.93178e+06	3.3926e+06	3.24352e+06	1.74642e+07	3.10308e+07	1.34165e+07	3.43865e+06	3.97871e+06	2.23447e+06	2.97175e+06	3.74282e+06	3.26155e+08	3.95306e+06	5.1629e+06	1.28943e+07	4.01994e+06	3.40097e+06	4.43958e+06	3.70581e+06	3.26483e+06	3.61228e+06	3.41114e+06	6.4673e+06	4.37111e+06	7.39423e+07	3.50115e+07	8.33268e+06	4.40357e+06	2.59473e+07	2.32447e+07
Com_3041_neg	ethyl 2-cyano-3-(tetrahydro-3-thiophenylamino)acrylate	C10 H14 N2 O2 S	452.154	9.674	225.07	Invalid mass	No results	No results	2.55487e+06	6.3164e+06	1.55628e+06	2.81188e+06	3.24948e+06	1.52816e+06	1.89038e+06	5.48485e+06	1.35714e+07	2.35968e+06	1.30771e+07	4.43669e+06	1.14468e+07	2.60924e+06	1.52507e+07	2.04157e+06	5.94567e+06	6.91405e+06	3.59707e+06	3.55939e+06	1.11776e+06	1.12904e+06	2.28298e+06	9.57494e+06	9.05366e+06	5.2501e+06	3.19149e+06	2.62667e+06	5.97021e+06	1.47337e+07	2.08544e+06	9.15864e+06	1.28669e+07	4.00896e+06	1.59076e+06	2.46753e+07	1.34416e+06	2.72089e+06	3.03168e+06	2.29631e+07	6.64971e+06
Com_3048_neg	NSI-189	C22 H30 N4 O	366.243	14.297	365.236	No results	No results	Full match	1.20064e+07	8.88361e+06	1.52272e+07	1.16872e+07	1.08102e+07	7.93364e+06	1.31927e+07	1.46e+07	1.63825e+07	1.5014e+07	1.26647e+07	1.14288e+07	1.07117e+07	1.37355e+07	1.33758e+07	8.93295e+06	1.20246e+07	1.29135e+07	1.11097e+07	1.21556e+07	9.60193e+06	1.03661e+07	1.22833e+07	1.2947e+07	1.0643e+07	1.01198e+07	1.79494e+07	1.63039e+07	1.58556e+07	1.27764e+07	1.45074e+07	1.51885e+07	1.98202e+07	1.83254e+07	1.31244e+07	1.21713e+07	1.81696e+07	1.87464e+07	1.09541e+07	9.58209e+06	1.64773e+07
Com_3061_neg	PA (18:1/18:1)	C39 H73 O8 P	700.505	15.951	699.497	No results	Full match	No results	6.69526e+06	1.05524e+07	1.09329e+07	9.3424e+06	1.17582e+07	7.55257e+06	1.56857e+07	1.47749e+06	492034	1.35225e+07	1.60772e+07	1.65039e+07	7.90469e+06	9.12997e+06	1.08827e+07	9.80485e+06	1.13312e+07	1.49789e+07	1.70755e+07	7.72758e+06	1.18454e+07	1.40319e+07	5.39615e+06	1.24972e+07	1.3283e+07	9.90465e+06	6.80956e+06	8.08916e+06	6.81783e+06	5.25611e+06	1.12432e+07	6.24775e+06	9.58892e+06	1.18875e+07	1.28937e+07	1.33548e+07	6.39516e+06	8.09662e+06	5.67393e+06	1.4509e+07	8.05212e+06
Com_3072_neg	Propylparaben	C10 H12 O3	180.079	9.936	179.072	Full match	No results	Full match	892188	1.59456e+06	7.98195e+06	1.5657e+07	1.69241e+06	1.34743e+06	2.12897e+06	1.56499e+06	1.72022e+06	1.7623e+06	1.76341e+06	1.57757e+07	2.21055e+06	1.51506e+06	1.69863e+07	6.87961e+06	1.24778e+06	8.44691e+06	2.51915e+06	1.79159e+07	4.11947e+06	1.72987e+06	9.0864e+06	2.70732e+06	8.04006e+06	5.98202e+06	9.92175e+06	1.55631e+06	3.64808e+06	5.88204e+06	2.08871e+06	3.76719e+06	1.3443e+06	3.04101e+06	2.14124e+06	1.82149e+07	1.71732e+06	1.24731e+06	4.05017e+06	2.2164e+06	1.58666e+06
Com_308_neg	Citric acid	C6 H8 O7	192.027	1.133	191.02	Full match	Full match	Full match	3.51197e+08	4.65688e+08	3.78517e+08	3.94171e+08	5.59912e+08	3.69296e+08	5.06309e+08	3.37736e+08	3.66749e+08	4.11839e+08	4.06173e+08	4.08334e+08	3.56642e+08	2.91869e+08	2.91772e+08	3.08204e+08	2.89227e+08	2.84748e+08	4.30499e+08	2.9012e+08	2.52535e+08	2.38024e+08	2.12125e+08	3.82319e+08	3.09547e+08	3.88128e+08	5.71989e+08	3.63312e+08	4.18241e+08	3.31857e+08	3.99034e+08	4.32188e+08	3.10892e+08	4.61769e+08	3.80088e+08	4.31367e+08	3.68929e+08	3.8658e+08	3.36701e+08	2.994e+08	3.21145e+08
Com_312_neg	LysoPC 18:0	C26 H54 N O7 P	523.364	15.242	522.357	No results	No results	Full match	1.2202e+08	1.83134e+08	1.61971e+08	4.31534e+08	1.33432e+08	7.96398e+07	1.87454e+08	1.41744e+08	2.64082e+08	1.22212e+08	1.64559e+08	1.65844e+08	1.0585e+08	1.57591e+08	3.06394e+08	2.36695e+08	1.22468e+08	2.27698e+08	1.72277e+08	2.50371e+08	2.1714e+08	3.73898e+08	6.61127e+07	9.99216e+07	8.30047e+07	2.31036e+08	2.82607e+08	3.29267e+08	2.2604e+08	2.80459e+08	1.39009e+08	3.18873e+08	1.06303e+08	1.27432e+08	1.54324e+08	1.74647e+08	2.75323e+08	1.01811e+08	1.22969e+08	1.60301e+08	1.83758e+08
Com_313_neg	(±)9-HpODE	C18 H32 O4	294.22	13.804	293.213	Invalid mass	No results	No match	2.66853e+06	3.08987e+06	3.80412e+06	4.12898e+06	7.4039e+06	9.50517e+06	1.34689e+07	5.98862e+06	4.65107e+06	4.36089e+06	4.8263e+06	2.84965e+06	2.68044e+06	5.4553e+07	2.43918e+06	3.23722e+07	1.04984e+07	4.01043e+07	1.95759e+07	1.58308e+07	4.3922e+07	3.14475e+07	3.15837e+08	3.26238e+06	2.88256e+06	2.43565e+06	8.45485e+06	5.24666e+06	2.13206e+06	521808	3.63712e+06	8.65522e+06	3.09856e+06	1.88165e+06	2.38852e+07	6.4598e+06	1.55522e+07	2.58743e+06	3.31044e+06	8.18137e+06	1.90196e+07
Com_3165_neg	2-Hydroxymyristic acid	C14 H28 O3	244.204	12.091	243.197	Full match	No results	No results	4.16647e+06	2.65166e+06	3.24734e+06	4.18349e+06	3.93877e+06	3.13959e+06	4.73477e+06	2.67624e+06	3.25782e+06	3.70263e+06	3.96636e+06	4.67952e+06	4.23506e+06	368676	3.18538e+06	4.08413e+06	3.26876e+06	3.48365e+06	4.38037e+06	3.09613e+06	3.28769e+06	3.20441e+06	1.21059e+07	4.03804e+06	4.01852e+06	3.2989e+06	2.98379e+06	3.45569e+06	4.25259e+06	2.96191e+06	2.6298e+06	3.59303e+06	3.01228e+06	3.20303e+06	3.47017e+06	4.21037e+06	3.73987e+06	3.65959e+06	3.02018e+06	3.69147e+06	3.05163e+06
Com_3175_neg	3-Hydroxyvaleric acid	C5 H10 O3	136.074	1.356	135.066	Invalid mass	Invalid mass	No results	1.78662e+06	5.24351e+06	3.73245e+06	4.7612e+06	8.93803e+06	1.15781e+07	1.06444e+07	3.28619e+06	1.04859e+07	3.12942e+06	3.29082e+06	4.61219e+06	3.54277e+06	3.0257e+06	8.94744e+06	1.16146e+07	7.67253e+06	4.05218e+06	3.76083e+06	2.12116e+06	2.70524e+06	3.20314e+06	1.20513e+07	3.92011e+06	6.69597e+06	4.43899e+06	3.35852e+06	3.41572e+06	5.54709e+06	2.75583e+06	3.10044e+06	3.61899e+06	3.99022e+06	5.6782e+06	3.68432e+06	9.55069e+06	8.60722e+06	5.99707e+06	4.89101e+06	1.06958e+07	1.18904e+07
Com_3176_neg	Glu-Gln	C10 H17 N3 O6	275.112	1.158	274.105	No results	Full match	No results	6.17098e+06	2.01282e+07	5.42221e+06	1.03272e+07	1.16691e+07	1.14741e+07	8.96701e+06	8.38301e+06	5.87069e+06	9.93967e+06	6.70439e+06	1.13239e+07	1.64917e+07	5.70706e+06	2.9738e+06	2.41283e+07	6.2877e+06	6.41086e+06	6.71566e+06	4.28056e+06	5.36168e+06	4.22527e+06	1.31034e+06	6.0602e+06	1.71225e+07	4.11443e+06	6.05903e+06	8.72408e+06	1.44051e+07	5.17004e+06	1.10981e+07	5.92838e+06	9.79751e+06	6.38875e+06	7.87252e+06	7.07486e+06	5.62488e+06	8.70706e+06	8.17846e+06	1.26165e+07	1.1351e+07
Com_3178_neg	D-Sedoheptulose 7-phosphate	C7 H15 O10 P	290.045	1.11	289.037	Invalid mass	No results	No results	281482	887404	526605	375593	904031	851357	1.28008e+06	351254	695689	419281	510106	225333	438435	210695	635107	788001	282749	253008	358059	227354	198520	331323	1.20234e+07	267789	218558	513047	409081	381723	230526	1.58968e+06	384636	278022	258896	408198	231745	1.48177e+06	678091	526917	240926	337290	796156
Com_31_neg	Docosahexaenoic acid	C22 H32 O2	328.24	14.031	327.233	Full match	Full match	No results	3.25784e+09	1.60668e+09	2.02081e+09	1.46907e+09	3.12747e+09	1.15703e+09	3.07508e+09	2.76661e+09	1.69278e+09	2.45037e+09	4.32661e+09	1.4473e+09	2.07516e+09	1.61245e+09	1.678e+09	1.37129e+09	1.95797e+09	3.16411e+09	1.09023e+09	1.81177e+09	9.0938e+08	1.52547e+09	4.77976e+09	1.42576e+09	1.78016e+09	1.68993e+09	2.30168e+09	2.63615e+09	1.83943e+09	1.68859e+09	1.91186e+09	1.42248e+09	2.0398e+09	2.07992e+09	1.86866e+09	1.67347e+09	1.52348e+09	3.19663e+09	2.74229e+09	1.0041e+09	2.13038e+09
Com_320_neg	FAHFA (16:0/18:2)	C34 H62 O4	552.473	14.303	551.468	No results	Invalid mass	No results	2.3243e+08	8.82085e+07	1.41184e+08	9.49407e+07	9.70826e+06	2.65596e+07	9.1597e+07	2.86228e+08	1.03756e+08	9.38864e+07	1.13713e+08	9.74817e+07	1.2708e+08	1.2573e+08	1.60927e+08	7.07511e+07	9.415e+07	1.43322e+08	1.09812e+08	2.05937e+08	9.82049e+07	1.41897e+08	3.1045e+08	1.29237e+08	9.64504e+07	1.53971e+08	9.89167e+07	1.26531e+08	6.53032e+07	1.0619e+08	1.07759e+08	1.68925e+08	1.27916e+08	1.17022e+08	1.00623e+08	9.76912e+07	1.18981e+08	1.73317e+08	1.2949e+08	6.13479e+07	1.47383e+08
Com_3213_neg	Jasmonic acid	C12 H18 O3	210.126	11.861	209.118	Full match	No results	No results	1.84303e+06	2.35952e+06	1.74563e+06	2.06006e+06	2.16308e+06	1.83158e+06	2.02676e+06	2.26426e+06	4.85691e+06	2.30219e+06	2.898e+06	3.1689e+06	3.42362e+06	2.03688e+06	1.90778e+06	1.86316e+06	1.85584e+06	2.63494e+06	1.82969e+06	1.29085e+06	2.16444e+06	1.65092e+06	1.50513e+06	2.73988e+06	3.10834e+06	3.48441e+06	5.09017e+06	1.72333e+06	4.30649e+06	2.55332e+06	3.47927e+06	1.68882e+06	1.01676e+07	2.68363e+06	2.34878e+06	2.89626e+06	2.23525e+06	3.84908e+06	1.80138e+06	2.59008e+07	1.8128e+06
Com_3237_neg	Lysopc 14:0	C22 H46 N O7 P	467.302	14.435	466.295	No results	No results	Full match	5.36875e+06	8.2222e+06	3.62726e+06	2.39634e+07	1.38364e+07	1.55544e+07	5.99408e+06	6.63504e+06	1.78136e+07	5.53298e+06	1.30298e+07	1.27974e+07	6.6431e+06	4.08194e+06	3.84303e+06	1.30169e+07	1.15012e+07	1.07335e+07	6.94459e+06	1.15409e+07	1.05224e+07	1.33778e+07	3.83626e+06	6.18439e+06	7.66624e+06	5.74895e+06	2.26633e+07	6.23973e+06	1.85918e+07	1.32981e+07	7.13159e+06	9.97566e+06	1.10287e+07	9.8583e+06	8.11759e+06	1.10389e+07	7.58162e+06	5.72703e+06	5.0483e+06	1.19625e+07	4.75864e+06
Com_3281_neg	alpha-Ketoglutaric acid	C5 H6 O5	146.022	1.422	145.014	No results	No results	Full match	6.06935e+06	1.84673e+07	6.03464e+06	2.06699e+07	1.82481e+07	1.19996e+07	7.04979e+06	1.56084e+07	9.8643e+06	1.11823e+07	8.41956e+06	1.37854e+07	1.30232e+07	3.86323e+06	3.77522e+06	8.63605e+06	1.15533e+07	5.99012e+06	1.0378e+07	7.92606e+06	7.42418e+06	4.42585e+06	4.3826e+06	1.30596e+07	1.29699e+07	4.69595e+06	2.008e+07	1.04862e+07	1.47199e+07	8.87485e+06	1.64016e+07	1.5698e+07	1.57659e+07	1.3923e+07	1.74113e+07	8.47462e+06	8.71625e+06	1.74123e+07	1.10561e+07	1.66934e+07	2.10996e+07
Com_3302_neg	PEtOH (16:1-20:4)	C41 H71 O8 P	722.489	16.451	721.483	No results	Full match	No results	8.6836e+06	1.14299e+07	4.93669e+06	9.87503e+06	9.07543e+06	1.51084e+07	2.24869e+07	9.47466e+06	2.17577e+07	1.54966e+07	1.30429e+07	1.07975e+07	1.18657e+07	1.19816e+07	5.36525e+06	9.14564e+06	5.42806e+06	1.41227e+07	2.33479e+07	7.79271e+06	9.06111e+06	1.31427e+07	5.66619e+06	8.51889e+06	1.07597e+07	1.18749e+07	3.41367e+06	7.37314e+06	1.12927e+07	1.01169e+07	7.34735e+06	1.1492e+07	8.73658e+06	5.95264e+06	1.67938e+07	1.11885e+07	5.75848e+06	8.17218e+06	1.23419e+07	9.25428e+06	7.52472e+06
Com_331_neg	SM (d14:2/20:0)	C39 H77 N2 O6 P	760.574	15.294	759.567	No results	Invalid mass	No results	1.3577e+08	3.47861e+08	3.31172e+08	2.66386e+08	3.96231e+08	4.0046e+08	4.0979e+08	1.76554e+08	3.4462e+08	2.40687e+08	3.06094e+08	1.7804e+08	2.2293e+08	3.47961e+08	3.21901e+08	3.04057e+08	2.60497e+08	3.44654e+08	3.3927e+08	2.09634e+08	1.69901e+08	3.0461e+08	1.81069e+08	3.94963e+08	4.44128e+08	1.74136e+08	4.22294e+08	1.81274e+08	3.26199e+08	3.0381e+08	4.105e+08	4.25626e+08	3.8509e+08	2.11236e+08	6.83394e+08	2.38265e+08	2.76429e+08	2.31288e+08	2.91825e+08	2.88088e+08	2.49501e+08
Com_3327_neg	SM (d14:2/18:0)	C37 H73 N2 O6 P	732.543	16.695	731.535	No results	Invalid mass	No results	7.88534e+06	1.38184e+07	1.0475e+07	1.81658e+07	1.20323e+07	1.1122e+07	8.11575e+06	9.43815e+06	1.16206e+07	4.57774e+06	7.68294e+06	1.56711e+07	9.32888e+06	5.04836e+06	8.55147e+06	6.56456e+06	7.97858e+06	7.68096e+06	8.49185e+06	4.73921e+06	9.36899e+06	1.29325e+07	5.99274e+06	1.72085e+07	9.94701e+06	7.25757e+06	1.02944e+07	8.32355e+06	2.17302e+07	1.00453e+07	2.12373e+07	1.42592e+07	8.09313e+06	2.45525e+07	6.55879e+06	9.39654e+06	6.97423e+06	1.09051e+07	8.71964e+06	1.02946e+07	1.21037e+07
Com_3380_neg	6-(4-methoxyphenyl)pyrimidine-2,4-diamine	C11 H12 N4 O	216.1	8.606	215.093	Invalid mass	No results	No results	1.94687e+06	3.45242e+06	8.06776e+06	1.81043e+07	634843	596477	773519	7.98092e+06	655330	1.22651e+07	9.88751e+06	1.94937e+06	1.94463e+06	1.25015e+07	548832	653798	718597	1.62413e+07	1.07713e+07	8.86823e+06	1.72805e+07	1.24179e+07	353043	2.29003e+06	669790	497008	1.05269e+07	9.34743e+06	2.60808e+06	1.55128e+07	2.09085e+06	8.00778e+06	2.0929e+06	833660	1.00983e+07	756236	546899	569399	661588	723178	542652
Com_3399_neg	GM3 d34:1; [M-H]-	C57 H104 N2 O21	1152.71	15.49	1151.71	No results	Full match	No results	1.2129e+07	1.07552e+07	7.19585e+06	1.07252e+07	1.39116e+07	1.01861e+07	9.52115e+06	8.65361e+06	8.84862e+06	1.11026e+07	6.69233e+06	1.10935e+07	1.32833e+07	1.21288e+07	1.00525e+07	1.24835e+07	1.58683e+07	1.51351e+07	5.18499e+06	4.89164e+06	8.90965e+06	7.36407e+06	7.03655e+06	1.54759e+07	1.7082e+07	8.41266e+06	8.45756e+06	6.27728e+06	1.7764e+07	8.42203e+06	7.68019e+06	8.69833e+06	8.56424e+06	1.18465e+07	938790	3.99076e+06	2.21102e+06	8.46463e+06	7.42079e+06	9.02987e+06	1.04793e+07
Com_3404_neg	PC (18:1e/22:6)	C48 H84 N O7 P	877.62	15.083	876.613	No results	Invalid mass	No results	3.82044e+06	1.06714e+07	1.02912e+07	7.78794e+06	5.96432e+06	1.01017e+07	1.7071e+07	1.02795e+07	1.30763e+07	8.15072e+06	6.64468e+06	8.46147e+06	7.00491e+06	6.62592e+06	5.79457e+06	9.10295e+06	9.56658e+06	5.27304e+06	1.29156e+07	1.02109e+07	8.07596e+06	1.15257e+07	6.04551e+06	1.02083e+07	5.67246e+06	9.90654e+06	1.50699e+07	1.43385e+07	1.23989e+07	8.20248e+06	2.16075e+07	1.06461e+07	9.65317e+06	6.09572e+06	1.54781e+07	1.72748e+07	4.58343e+06	1.26812e+07	7.96256e+06	1.19376e+07	4.52657e+06
Com_341_neg	PI (18:0/18:2)	C45 H83 O13 P	862.559	15.907	861.551	No results	Full match	No results	2.43905e+08	2.38396e+08	1.68903e+08	3.0923e+08	4.30652e+08	3.53605e+08	4.30839e+08	1.71546e+08	1.89743e+08	3.2722e+08	1.75532e+08	2.62099e+08	3.43479e+08	2.80873e+08	3.08503e+08	2.19604e+08	3.30994e+08	4.48814e+08	1.55412e+08	2.26778e+08	1.59462e+08	3.38361e+08	7.93161e+07	2.99387e+08	5.07377e+08	1.3528e+08	2.15921e+08	2.67216e+08	7.75525e+08	1.88732e+08	4.37537e+08	2.83671e+08	3.15183e+06	6.11847e+08	3.08653e+08	1.34776e+08	1.42164e+08	2.90823e+08	2.11603e+08	2.57832e+08	2.94159e+08
Com_3435_neg	Xanthosine	C10 H12 N4 O6	284.078	13.925	283.071	Invalid mass	No results	No results	1.18855e+07	1.61039e+07	5.57868e+06	2.86341e+06	2.67136e+06	5.39443e+06	2.97358e+06	1.63231e+06	6.5796e+06	942906	4.46587e+06	6.08487e+06	5.1893e+06	7.99524e+06	2.26251e+06	4.20266e+06	3.96784e+06	7.62257e+06	6.35421e+06	1.19946e+07	5.79342e+06	1.26455e+07	2.71643e+06	1.76057e+07	3.47135e+06	2.78165e+06	2.99539e+06	636000	1.31556e+07	1.04591e+07	4.697e+06	1.0066e+07	6.59715e+06	4.95223e+06	6.82158e+06	2.51469e+06	1.27288e+06	2.22544e+06	2.19099e+06	2.94846e+06	3.12459e+06
Com_3449_neg	LPA 20:5	C23 H37 O7 P	456.229	13.574	455.221	No results	Full match	No results	1.80909e+06	903887	1.04469e+07	4.2488e+06	1.25223e+07	1.82409e+06	1.9165e+07	3.90375e+06	6.27455e+06	3.56232e+06	1.68736e+07	1.37945e+06	794662	8.98486e+06	3.68321e+06	1.22213e+06	1.83008e+06	2.09845e+07	9.3975e+06	1.12074e+07	2.12947e+06	1.41787e+07	4.73669e+06	539278	270725	1.30163e+07	9.40208e+06	9.09465e+06	3.25774e+06	6.55319e+06	1.28686e+06	1.01568e+07	1.09018e+06	5.65226e+06	5.62452e+06	7.43649e+06	1.93039e+06	1.33991e+06	531738	694521	1.5027e+06
Com_3452_neg	9-KODE	C18 H30 O3	294.219	14.165	293.212	No results	No results	Full match	4.25196e+06	3.80685e+06	3.60365e+06	3.81432e+06	2.6878e+06	1.88097e+06	2.90391e+06	3.36115e+06	2.5873e+06	2.67474e+06	3.27966e+06	2.75272e+06	3.74591e+06	6.34766e+06	3.47049e+06	3.87865e+06	2.30729e+06	3.70835e+06	2.51654e+06	3.14142e+06	5.08736e+06	4.20247e+06	1.04826e+07	4.87566e+06	3.34544e+06	4.43527e+06	6.08278e+06	4.24947e+06	3.63045e+06	4.08016e+06	4.15822e+06	3.5667e+06	5.07506e+06	3.76927e+06	5.12416e+06	4.86581e+06	5.21652e+06	3.98537e+06	4.33936e+06	2.61068e+06	3.45287e+06
Com_345_neg	Dihydroroseoside	C19 H32 O8	388.21	10.192	387.202	Full match	No results	No results	163771	213456	227381	283933	2.44211e+08	2.2372e+08	3.52807e+08	270315	1.97569e+08	285218	305139	299720	325664	212686	3.24437e+07	2.49169e+08	8.76554e+07	345263	297497	245359	225996	296000	8.79061e+06	293826	1.86024e+07	2.70402e+07	452340	397064	579906	377692	366645	555085	411479	1.92725e+07	406312	3.33436e+08	2.18335e+08	3.46264e+07	9.36496e+06	1.78789e+08	1.41292e+08
Com_3495_neg	PC (16:1/22:6)	C46 H78 N O8 P	863.568	15.41	862.562	No results	Invalid mass	No results	6.09209e+06	1.05667e+07	1.08526e+07	8.77903e+06	8.81847e+06	1.34319e+07	1.55578e+07	6.49228e+06	1.13767e+07	8.25114e+06	1.14121e+07	1.19411e+07	9.48895e+06	1.06249e+07	1.00548e+07	5.90981e+06	8.27704e+06	1.40805e+07	1.20363e+07	3.92768e+06	7.28354e+06	4.62002e+06	4.49096e+06	7.14708e+06	8.56209e+06	7.94373e+06	1.0138e+07	8.75202e+06	1.89664e+07	1.69367e+07	8.63063e+06	1.06339e+07	6.08443e+06	1.00002e+07	1.19505e+07	6.54487e+06	1.08806e+07	8.11872e+06	1.34529e+07	9.03614e+06	9.41261e+06
Com_3508_neg	Lysope 18:1	C23 H46 N O7 P	479.301	14.284	478.294	No results	No results	Full match	3.55293e+06	1.80314e+07	3.96627e+06	4.93897e+06	9.06789e+06	8.87996e+06	4.38775e+06	5.11819e+06	1.46418e+07	4.26715e+06	9.60347e+06	1.52525e+07	8.24773e+06	3.78596e+06	3.23894e+06	1.54613e+07	6.09029e+06	3.40463e+06	4.19885e+06	8.65064e+06	9.2078e+06	3.53476e+06	3.34532e+06	6.73809e+06	5.60395e+06	3.02822e+06	1.10981e+07	4.27727e+06	6.05843e+06	7.6939e+06	5.10128e+06	5.88827e+06	5.23247e+06	7.3003e+06	9.05418e+06	9.454e+06	1.10718e+07	3.49493e+06	4.12802e+06	1.36909e+07	3.3311e+06
Com_3516_neg	LPA 20:3	C23 H41 O7 P	460.258	15.259	459.25	No results	Full match	No results	5.84026e+06	1.05752e+07	1.07758e+07	1.42047e+07	3.37519e+06	9.03983e+06	8.22884e+06	6.80878e+06	1.01957e+07	4.72592e+06	9.59209e+06	9.30202e+06	7.82443e+06	1.33978e+07	1.24222e+07	1.30838e+07	7.65262e+06	1.08489e+07	8.46653e+06	1.46288e+07	1.0135e+07	1.46017e+07	4.28375e+06	6.85352e+06	9.7843e+06	1.00304e+07	7.48526e+06	7.61231e+06	6.30319e+06	5.81396e+06	3.95581e+06	6.75847e+06	4.46852e+06	6.45905e+06	8.08864e+06	7.32518e+06	9.84048e+06	4.9594e+06	5.61315e+06	6.82082e+06	7.26867e+06
Com_3519_neg	MAG (18:2)	C21 H38 O4	354.277	14.067	353.27	No results	No results	Full match	6.08681e+06	6.65533e+06	7.58278e+06	7.25604e+06	6.89024e+06	5.19263e+06	1.04272e+07	5.41382e+06	4.22428e+06	9.3396e+06	3.52217e+06	1.34725e+06	6.30858e+06	1.19325e+07	9.89015e+06	8.77733e+06	6.33388e+06	1.38464e+07	8.71163e+06	1.36466e+07	1.13868e+07	2.01183e+07	4.67872e+06	6.5506e+06	5.29477e+06	8.90076e+06	6.40348e+06	8.30096e+06	3.77227e+06	5.09247e+06	4.68969e+06	9.51167e+06	4.68827e+06	3.94091e+06	8.76668e+06	5.60514e+06	5.50632e+06	3.90619e+06	3.75853e+06	6.98684e+06	6.62519e+06
Com_3535_neg	FAHFA (16:1/18:3)	C34 H58 O4	530.432	13.96	529.425	No results	Full match	No results	1.13173e+07	3.74375e+06	1.12176e+06	671691	1.93119e+06	2.90892e+06	963285	6.41491e+06	2.38115e+06	3.57382e+06	2.17081e+06	6.54679e+06	4.33316e+06	2.10417e+06	1.69799e+06	387974	1.62059e+06	2.88587e+06	1.37824e+06	1.07856e+07	1.60075e+06	838584	2.56871e+06	2.48684e+06	2.83844e+06	1.12453e+06	1.01894e+06	2.40643e+06	477522	1.75133e+06	1.80837e+06	1.33904e+06	3.17146e+06	1.5014e+06	950867	1.0614e+06	4.82066e+06	4.0445e+06	3.54783e+06	872143	5.51595e+06
Com_3572_neg	Sorbitan monooleate	C24 H44 O6	428.314	13.9	427.306	Full match	No results	No results	624220	580188	1.26154e+06	2.03813e+06	1.53435e+07	1.45811e+07	1.48816e+07	1.25389e+06	1.2322e+07	1.24773e+06	1.09683e+06	803665	699488	1.10577e+06	4.52444e+06	1.62488e+07	5.3262e+06	974845	808583	685906	1.04754e+06	957432	690226	617957	3.15234e+06	1.60411e+06	1.45276e+06	1.13438e+06	744280	2.43301e+06	668067	920104	639301	3.20445e+06	854228	1.89283e+07	1.17712e+07	4.72193e+06	1.74815e+06	1.15753e+07	9.69864e+06
Com_3586_neg	LPA 16:1	C19 H37 O7 P	408.228	13.693	407.221	No results	Full match	No results	949193	5.49651e+06	3.8864e+06	7.06585e+06	1.54443e+07	8.653e+06	1.08926e+07	5.47208e+06	7.48203e+06	2.56703e+06	5.3733e+06	4.30975e+06	2.51649e+06	6.08617e+06	6.74011e+06	3.20381e+06	5.2481e+06	1.2794e+07	4.76639e+06	1.39758e+07	1.55773e+07	1.12177e+07	686515	3.45091e+06	1.16842e+06	5.36775e+06	1.32791e+07	4.48852e+06	2.65741e+06	8.06356e+06	2.61294e+06	5.2162e+06	2.59135e+06	6.20774e+06	4.09204e+06	1.20119e+07	6.48299e+06	1.09682e+06	2.34536e+06	5.96282e+06	1.79411e+06
Com_3645_neg	3-(3-Methoxyphenyl)propionic acid	C10 H12 O3	180.079	7.926	179.072	No results	No results	Full match	759839	1.09407e+06	2.29141e+06	1.17191e+07	916836	4.30367e+06	2.06099e+07	1.60101e+06	1.3596e+06	2.23706e+06	2.20189e+06	945059	1.25872e+06	2.18121e+06	713901	1.18954e+06	1.34033e+06	7.34583e+06	1.51045e+07	3.34091e+06	4.04386e+06	2.04554e+06	1.81364e+06	864244	851186	627991	2.13396e+06	2.17753e+06	3.31686e+06	3.32529e+06	2.80802e+06	2.03262e+06	1.16761e+06	1.16915e+06	6.38973e+06	1.14569e+06	1.09735e+06	884024	1.00602e+06	1.03782e+06	1.1388e+06
Com_3655_neg	Lysopc 16:1	C24 H48 N O7 P	493.318	15.249	492.311	No results	No results	Full match	4.89559e+06	7.70015e+06	5.65435e+06	1.14106e+07	4.97467e+06	3.98715e+06	6.57045e+06	4.91491e+06	7.94579e+06	5.35088e+06	8.9346e+06	8.27835e+06	4.73388e+06	5.84112e+06	1.12591e+07	1.00847e+07	5.09449e+06	8.27013e+06	6.5699e+06	1.35696e+07	6.93844e+06	1.13608e+07	2.53623e+06	4.5205e+06	4.6108e+06	1.00691e+07	5.39994e+06	6.54499e+06	5.82862e+06	4.47289e+06	3.26692e+06	7.70622e+06	2.84361e+06	4.2156e+06	5.22476e+06	5.22832e+06	5.32944e+06	3.42967e+06	5.10807e+06	5.14339e+06	5.19011e+06
Com_365_neg	Methylmalonic acid	C4 H6 O4	118.027	1.148	117.019	Full match	Full match	Full match	4.2805e+07	3.22858e+07	3.25808e+07	5.12749e+07	3.70306e+07	3.06753e+07	3.8931e+07	7.53425e+07	8.56685e+07	1.13044e+08	1.09426e+08	3.56012e+07	3.03909e+07	1.00427e+08	8.21542e+07	3.9327e+07	3.16441e+07	8.17148e+07	8.70347e+07	2.5334e+07	3.29777e+07	2.93949e+07	2.59516e+08	4.2424e+07	9.15833e+07	3.00721e+07	3.36384e+07	3.73987e+07	5.23331e+07	3.83403e+07	3.24465e+07	3.29515e+07	3.40236e+07	4.13626e+07	4.60798e+07	4.73624e+07	2.97771e+07	2.81398e+07	2.47659e+07	5.50827e+07	4.48215e+07
Com_3669_neg	tetranor-12(R)-HETE	C16 H26 O3	266.189	11.539	265.181	Full match	No results	No results	218707	375757	984363	1.93041e+07	750692	625581	617853	305664	621915	9.34146e+06	1.09036e+06	986892	1.16494e+06	388330	1.43243e+06	2.72332e+06	480861	715523	2.12168e+06	666554	371655	619210	497903	1.45046e+06	407563	367773	728286	255550	463668	445757	545301	290705	442269	1.54866e+06	628799	1.02872e+06	470224	1.19175e+06	262923	1.79915e+06	1.19802e+06
Com_370_neg	2-Isopropylmalic acid	C7 H12 O5	176.069	1.148	175.061	Full match	Full match	Full match	1.44253e+06	2.74064e+06	2.25e+06	2.40299e+06	9.20538e+06	8.82662e+06	2.56172e+07	1.72318e+06	1.02837e+07	2.39884e+06	2.6926e+06	2.83654e+06	2.30573e+06	1.78986e+06	2.40252e+07	7.82842e+06	6.99003e+06	2.75197e+06	2.78362e+06	1.64368e+06	2.03885e+06	2.23417e+06	2.54276e+08	2.77019e+06	2.59761e+06	1.03719e+07	2.03301e+06	1.82233e+06	2.593e+06	1.66223e+06	1.57376e+06	1.80767e+06	1.78848e+06	4.87027e+06	2.14792e+06	2.64007e+07	7.56244e+06	5.12129e+06	1.83895e+06	5.96947e+06	8.64952e+06
Com_3728_neg	2-Furoic acid	C5 H4 O3	112.016	1.079	111.009	Full match	Full match	Full match	1.03324e+07	1.24937e+07	1.0348e+07	1.07768e+07	1.48358e+07	1.0396e+07	1.3917e+07	8.766e+06	8.75538e+06	8.21006e+06	7.38881e+06	1.21368e+07	8.68418e+06	5.94219e+06	7.2292e+06	5.43661e+06	8.01626e+06	7.60872e+06	1.03787e+07	7.13128e+06	6.04987e+06	6.84408e+06	4.24867e+06	9.6521e+06	9.57593e+06	9.11956e+06	1.54481e+07	1.2259e+07	1.38894e+07	9.90222e+06	1.30753e+07	1.4114e+07	1.10264e+07	1.36491e+07	1.16488e+07	9.66592e+06	1.08515e+07	1.05609e+07	1.15807e+07	1.09851e+07	9.92481e+06
Com_3736_neg	FAHFA (2:0/22:1)	C24 H44 O4	396.324	13.891	395.317	No results	Full match	No results	4.61911e+06	1.07313e+07	1.30716e+07	1.57446e+07	7.24244e+06	3.87927e+06	7.71662e+06	8.17463e+06	1.14014e+07	1.1052e+07	1.09957e+07	1.06042e+07	1.11602e+07	1.52811e+07	5.00068e+06	1.31304e+07	1.28171e+07	7.55686e+06	1.27967e+07	7.19952e+06	1.08531e+07	1.42326e+07	7.23791e+06	1.51671e+07	1.69875e+07	1.46011e+07	1.11301e+07	9.82724e+06	8.21838e+06	8.7501e+06	1.015e+07	9.80302e+06	1.09945e+07	9.89014e+06	1.25953e+07	9.12483e+06	1.04771e+07	8.69518e+06	1.05533e+07	1.22735e+07	8.04033e+06
Com_373_neg	Bilirubin	C33 H36 N4 O6	584.264	12.479	583.256	Full match	Invalid mass	Full match	2.50716e+07	1.6615e+08	1.83988e+08	3.40275e+08	6.89617e+07	1.03991e+08	1.32197e+06	3.08504e+08	4.16486e+08	1.76722e+08	1.4378e+08	3.58572e+08	3.48304e+08	5.3249e+07	1.55659e+07	1.81909e+08	2.06261e+08	1.18397e+08	1.22462e+08	1.44324e+08	2.6176e+08	1.63671e+08	6.1438e+06	4.53237e+08	2.27724e+08	1.1384e+06	2.14894e+08	2.44366e+08	3.15607e+08	4.12756e+08	3.56864e+08	1.87365e+08	2.37822e+08	2.0723e+08	2.32437e+08	4.44632e+07	1.27354e+08	1.39395e+08	1.84363e+08	2.00971e+08	8.92466e+07
Com_3743_neg	Ureidosuccinic acid	C5 H8 N2 O5	176.044	1.146	175.036	No results	No results	Full match	546487	1.63742e+06	1.20242e+06	1.21569e+06	1.04218e+06	1.06893e+06	1.12952e+06	661712	1.73379e+06	756904	1.43622e+06	138539	535091	551103	556003	1.17342e+06	437895	1.27466e+06	1.19254e+06	1.16882e+06	632065	950738	9.126e+06	996899	529299	684207	794069	1.06203e+06	870923	3.1364e+06	618593	609144	1.22156e+06	853264	1.32559e+06	1.25526e+06	1.21242e+06	543613	1.02495e+06	607868	547912
Com_3766_neg	5(S),15(S)-DiHETE	C20 H32 O4	336.231	11.668	335.223	Full match	No results	Full match	220625	486914	2.11913e+06	1.53322e+06	1.25506e+06	608590	697135	433299	819532	660409	6.27404e+06	478608	290886	443665	342714	1.03642e+06	304946	3.10132e+06	5.14231e+06	1.75835e+06	1.06825e+06	1.78669e+07	1.66924e+06	292139	460460	441289	7.80263e+06	934684	954061	2.75011e+06	287311	971293	301850	690441	1.16109e+06	659690	862589	333259	425743	649223	1.16931e+06
Com_376_neg	PE (18:0/18:2)	C41 H78 N O8 P	743.548	14.552	742.541	No results	Full match	No results	1.08855e+08	1.84984e+08	1.60047e+08	2.21403e+08	1.60205e+08	1.7779e+08	3.84664e+08	1.6944e+08	2.14413e+08	2.01738e+08	1.84373e+08	2.46176e+08	1.26797e+08	1.63399e+08	1.95713e+08	2.22833e+08	4.94545e+08	1.67092e+08	3.2697e+08	1.25708e+08	1.98969e+08	2.22924e+08	9.15734e+07	2.29361e+08	1.51772e+08	2.13881e+08	2.70104e+08	2.37028e+08	2.94068e+08	1.46162e+08	2.29887e+08	1.79979e+08	2.58067e+08	2.49671e+08	2.62042e+08	2.97806e+08	1.16912e+08	1.99971e+08	1.19911e+08	2.17637e+08	1.71744e+08
Com_378_neg	D-(-)-Mannitol	C6 H14 O6	182.079	1.253	181.072	Full match	Full match	Full match	1.34438e+07	3.96907e+07	4.13771e+07	2.75856e+07	1.49776e+07	2.29452e+07	2.53519e+07	2.31838e+07	2.20284e+07	2.45786e+07	2.59315e+07	3.9605e+07	2.28281e+07	3.0019e+07	3.79001e+07	2.75855e+07	5.25727e+07	4.11823e+07	3.04221e+07	2.1868e+07	4.51652e+07	2.86841e+07	2.46638e+08	1.39536e+07	4.71805e+07	2.30121e+07	3.51707e+07	2.00612e+07	3.06246e+07	3.24756e+07	3.63733e+07	2.65866e+07	3.19189e+07	1.70582e+07	1.92407e+07	1.96232e+07	2.01587e+07	1.92539e+07	4.53343e+07	4.19964e+07	2.14497e+07
Com_3807_neg	4-Pyridoxic acid	C8 H9 N O4	183.053	5.847	182.046	Full match	Full match	Full match	2.6023e+06	8.65238e+06	6.147e+06	6.26258e+06	1.10807e+07	4.43036e+06	7.79031e+06	7.01775e+06	7.77106e+06	4.94787e+06	5.3748e+06	7.56201e+06	4.22026e+06	1.47692e+07	6.33714e+06	4.59166e+06	7.08526e+06	5.88626e+06	9.02882e+06	4.30677e+06	5.29448e+06	1.31748e+07	3.49102e+06	5.14202e+06	7.76791e+06	3.90074e+06	7.13784e+06	5.53582e+06	2.33191e+07	3.92863e+06	6.45381e+06	5.23995e+06	5.54923e+06	8.93084e+06	8.15678e+06	4.38039e+06	2.76302e+06	4.67928e+06	3.21269e+06	3.15319e+06	6.36133e+06
Com_3810_neg	PC (20:2/20:4)	C48 H84 N O8 P	893.614	14.542	892.607	No results	Invalid mass	No results	7.1969e+06	5.25982e+06	1.08388e+07	1.81547e+07	1.00189e+07	9.95778e+06	9.37126e+06	1.06794e+07	9.83406e+06	1.21659e+07	9.98681e+06	1.27111e+07	8.04254e+06	9.15508e+06	7.43429e+06	1.08088e+07	9.18617e+06	1.03263e+07	1.14887e+07	8.64731e+06	4.32908e+06	8.43281e+06	2.80935e+06	1.08257e+07	8.42617e+06	6.28343e+06	1.10893e+07	9.81161e+06	1.27376e+07	7.79974e+06	9.04854e+06	1.03291e+07	1.07031e+07	1.49452e+07	1.15307e+07	9.76233e+06	9.75683e+06	8.73794e+06	1.34954e+07	1.38311e+07	1.12849e+07
Com_3833_neg	8-Iso prostaglandin A2	C20 H30 O4	334.215	11.65	333.208	Full match	No results	Full match	308898	893684	786511	1.35238e+07	742667	620849	669829	471484	710961	2.36901e+06	1.94626e+06	970926	1.04442e+06	656165	1.59444e+06	2.40056e+06	599303	767080	1.57969e+06	621691	507318	1.03716e+06	8.76676e+06	953474	633839	519025	1.01753e+06	730116	928467	1.0437e+06	774573	722961	1.17917e+06	1.28374e+06	763815	1.06483e+06	665469	748724	791473	1.3175e+06	1.11833e+06
Com_3863_neg	LPC 19:0	C27 H56 N O7 P	597.4	15.527	596.394	No results	Invalid mass	No results	3.08373e+06	2.85976e+06	2.39941e+06	1.17281e+07	3.25248e+06	2.73339e+06	6.32227e+06	5.1227e+06	4.3986e+06	857537	5.6434e+06	4.66283e+06	2.42058e+06	2.19235e+06	6.30022e+06	4.65203e+06	4.63965e+06	3.35065e+06	4.71612e+06	6.50338e+06	5.17422e+06	1.53534e+07	2.86198e+06	3.00637e+06	4.1219e+06	8.54394e+06	3.42618e+06	1.06304e+07	5.62476e+06	7.90991e+06	761122	7.24189e+06	5.3767e+06	3.01546e+06	3.36369e+06	3.86789e+06	4.33646e+06	1.83645e+06	1.90283e+06	3.5949e+06	2.89559e+06
Com_3894_neg	D-Saccharic acid	C6 H10 O8	210.038	1.144	209.03	Full match	Full match	Full match	2.67552e+06	7.12023e+06	6.68919e+06	1.23831e+07	1.49333e+07	9.97539e+06	7.85848e+06	9.09223e+06	1.15108e+07	8.33853e+06	1.0908e+07	1.20039e+07	9.76673e+06	3.58553e+06	4.69939e+06	1.18095e+07	1.32013e+07	8.63752e+06	1.0926e+07	8.31425e+06	6.84165e+06	6.42141e+06	2.58889e+06	1.30908e+07	1.11638e+07	2.68127e+06	1.07055e+07	5.4712e+06	1.64743e+07	6.08804e+06	1.19881e+07	7.99105e+06	1.12699e+07	8.98126e+06	1.02516e+07	5.91518e+06	6.47628e+06	1.09706e+07	8.16878e+06	1.23753e+07	1.33029e+07
Com_3923_neg	13,14-dihydro-15-keto Prostaglandin A2	C20 H30 O4	316.204	12.579	315.197	Invalid mass	No results	No match	219347	391435	371635	348275	487402	399553	562263	269570	398513	390993	380502	567930	425492	316423	466303	565965	444613	387190	365886	443689	354179	575753	8.42069e+06	449289	521284	414433	409628	317333	566155	263593	474595	580995	382163	377126	560879	488208	445635	320331	293894	537810	513118
Com_3947_neg	LPA 18:3	C21 H37 O7 P	432.228	13.6	431.221	No results	Full match	No results	761591	2.16163e+06	6.47542e+06	8.85339e+06	7.77412e+06	4.12533e+06	4.28646e+06	5.02805e+06	3.06058e+06	5.0498e+06	2.65095e+06	1.66864e+06	1.58822e+06	6.7565e+06	6.3494e+06	2.31887e+06	2.60239e+06	1.01188e+07	8.68168e+06	7.54027e+06	1.23903e+07	1.64302e+07	1.1444e+06	2.17961e+06	556606	5.70378e+06	9.04458e+06	5.02306e+06	1.65125e+06	7.57712e+06	1.93772e+06	9.88693e+06	1.65619e+06	3.41066e+06	2.91829e+06	1.18312e+07	2.68095e+06	713978	752014	1.74811e+06	1.37031e+06
Com_394_neg	SM (d14:3/28:0)	C47 H91 N2 O6 P	870.684	16.243	869.677	No results	Invalid mass	No results	8.78573e+07	2.18222e+08	2.13713e+08	3.56468e+08	2.78098e+08	1.69234e+08	2.13191e+08	1.62568e+08	3.77211e+08	1.67139e+08	1.54606e+08	4.91948e+08	3.04487e+08	1.17494e+08	1.65383e+08	1.95094e+08	3.18958e+08	2.69208e+08	2.38612e+08	2.17445e+08	1.07079e+08	1.43726e+08	1.32583e+08	2.3752e+08	2.75966e+08	2.81274e+08	2.70387e+08	2.95818e+08	4.01438e+08	1.3836e+08	2.35252e+08	2.21546e+08	2.11766e+08	2.73221e+08	1.90116e+08	2.11764e+08	1.55066e+08	2.19031e+08	2.51942e+08	2.548e+08	3.59843e+08
Com_3961_neg	PE (22:4e/18:2)	C45 H80 N O7 P	777.566	16.631	776.558	No results	Full match	No results	2.71679e+06	8.59478e+06	2.0012e+06	3.82517e+06	4.39085e+06	1.40078e+07	4.48961e+06	2.80564e+06	5.46618e+06	3.99746e+06	3.52204e+06	4.31316e+06	5.08645e+06	3.78806e+06	3.51287e+06	4.0956e+06	3.44005e+06	3.75896e+06	7.633e+06	2.0726e+06	4.75706e+06	6.84377e+06	2.48988e+06	3.97605e+06	4.85285e+06	2.0363e+06	9.32165e+06	2.96082e+06	4.22959e+06	1.36568e+07	8.41108e+06	5.63696e+06	2.15212e+06	8.61069e+06	4.28513e+06	2.99423e+06	5.4513e+06	1.58412e+06	2.6252e+06	2.6478e+06	2.22711e+06
Com_397_neg	PE (18:0/20:4)	C43 H78 N O8 P	767.548	16.655	766.541	No results	Full match	No results	1.05205e+08	2.39614e+08	1.72638e+08	9.55686e+07	1.37715e+08	2.52332e+08	2.25262e+08	1.33321e+08	3.58946e+08	1.93633e+08	1.33019e+08	1.33208e+08	9.66523e+07	1.10836e+08	1.5666e+08	1.49029e+08	1.04015e+08	2.28759e+08	3.58806e+08	7.53316e+07	1.47603e+08	1.33511e+08	5.92697e+07	9.73776e+07	2.74867e+08	2.06051e+08	2.79684e+08	6.95607e+07	1.57442e+08	2.9103e+08	1.29876e+08	1.53109e+08	1.31638e+08	1.29734e+08	3.03463e+08	1.49801e+08	1.69732e+08	4.36695e+07	1.75718e+08	9.89788e+07	1.10243e+08
Com_3_neg	Ethyl myristate	C16 H32 O2	256.24	14.283	255.233	Full match	No results	No results	6.26266e+10	3.94291e+10	4.65461e+10	4.06417e+10	4.54795e+10	3.48468e+10	4.12713e+10	6.76257e+10	4.10391e+10	5.40297e+10	4.58025e+10	4.39525e+10	4.87557e+10	45000169424	5.23325e+10	3.42168e+10	38744036307	5.13619e+10	4.21913e+10	6.25726e+10	3.88556e+10	5.04343e+10	69454374591	4.89441e+10	4.2161e+10	4.99351e+10	40518949401	4.7479e+10	3.23962e+10	3.83516e+10	4.22701e+10	5.30498e+10	4.47596e+10	4.35946e+10	4.07838e+10	3.79411e+10	41521965759	5.22885e+10	4.4584e+10	3.1513e+10	4.6438e+10
Com_4065_neg	8,15-Dihete	C20 H32 O4	336.23	12.67	335.223	No results	No results	Full match	1.35954e+06	2.71432e+06	2.83703e+06	3.61836e+06	1.8047e+06	2.10668e+06	2.12717e+06	1.83992e+06	2.67538e+06	2.17388e+06	2.6554e+06	2.80018e+06	2.98013e+06	2.79508e+06	1.71146e+06	3.40616e+06	1.76463e+06	2.36124e+06	2.95652e+06	1.68451e+06	2.3662e+06	4.05373e+06	7.85616e+06	3.03359e+06	3.38968e+06	3.13091e+06	3.12319e+06	1.97876e+06	2.65917e+06	3.03176e+06	2.11846e+06	2.46464e+06	2.78148e+06	3.54555e+06	2.85775e+06	2.67763e+06	2.88058e+06	1.88263e+06	2.30712e+06	3.1682e+06	1.86843e+06
Com_4091_neg	Malonic acid	C3 H4 O4	104.011	1.137	103.004	No results	No results	Full match	5.09365e+06	1.31009e+07	8.41919e+06	1.10166e+07	7.48081e+06	2.87488e+06	1.0239e+07	2.70834e+06	1.49613e+07	1.00971e+07	1.071e+07	6.51286e+06	3.79382e+06	7.56457e+06	7.94566e+06	9.06098e+06	7.99725e+06	9.10228e+06	1.10577e+07	9.47134e+06	3.92813e+06	7.43839e+06	5.72919e+06	7.82491e+06	6.71395e+06	3.97515e+06	1.29694e+07	9.00156e+06	8.6664e+06	9.23891e+06	7.3057e+06	1.24491e+07	3.07492e+06	7.26408e+06	1.25757e+07	3.63592e+06	5.28966e+06	6.44366e+06	4.21776e+06	9.56673e+06	9.98377e+06
Com_4117_neg	FAHFA (16:0/14:1)	C30 H56 O4	480.419	14.576	479.411	No results	Full match	No results	4.27435e+06	7.9573e+06	7.25969e+06	5.90863e+06	3.66309e+06	3.2703e+06	2.72032e+06	4.52465e+06	6.1763e+06	6.13605e+06	4.93539e+06	4.82083e+06	8.62835e+06	7.46218e+06	2.83432e+06	1.03593e+07	1.29798e+07	5.21872e+06	8.16618e+06	2.99028e+06	4.17457e+06	1.15359e+07	2.70154e+06	9.53169e+06	5.43666e+06	7.72553e+06	8.36426e+06	6.79328e+06	6.85143e+06	4.75519e+06	9.76989e+06	7.94674e+06	8.48434e+06	6.71429e+06	1.02651e+07	5.54861e+06	6.34143e+06	4.1645e+06	7.31988e+06	6.62518e+06	3.99344e+06
Com_4118_neg	Ursodeoxycholic acid	C24 H40 O4	392.294	14.557	437.292	No results	No results	Full match	4.43903e+06	2.31778e+06	1.87617e+06	2.92752e+06	7.95836e+06	4.08264e+06	2.51376e+06	6.19567e+06	2.59492e+06	3.62754e+06	8.56025e+06	2.16181e+06	1.73082e+06	3.20126e+06	2.6307e+06	1.3535e+06	2.57982e+06	9.61592e+06	2.41788e+06	1.10305e+07	2.58891e+06	2.57303e+06	2.12106e+06	1.59871e+06	1.12112e+06	2.61605e+06	3.18866e+06	2.49119e+06	2.94615e+06	2.43708e+06	2.25652e+06	4.58008e+06	1.32428e+06	3.30558e+06	6.91426e+06	1.78924e+06	2.15699e+06	5.11076e+06	1.41836e+06	1.42463e+06	7.13705e+06
Com_4136_neg	Phosphatidylinositol-1,2-dipalmitoyl	C41 H79 O13 P	810.528	15.788	809.52	Full match	No results	No results	3.3841e+06	2.7838e+06	2.97603e+06	3.15859e+06	6.64403e+06	1.61365e+06	3.07051e+06	7.0837e+06	3.04713e+06	3.25055e+06	2.22822e+06	1.56784e+06	1.20441e+06	1.49953e+06	2.45789e+06	1.6826e+06	1.52061e+07	5.49802e+06	2.65416e+06	2.40974e+06	1.35325e+06	2.41461e+06	1.46322e+06	4.52557e+06	1.10256e+07	1.89825e+06	1.30336e+06	816475	5.71928e+06	1.26488e+06	3.93433e+06	9.19409e+06	1.30147e+06	4.15556e+06	1.07755e+06	860175	832073	4.78327e+06	776693	1.24218e+06	2.88552e+06
Com_4172_neg	N-Carbamyl-L-glutamicacid	C6 H10 N2 O5	190.059	1.148	189.052	No results	No results	Full match	1.64233e+06	3.35737e+06	3.81857e+06	3.94432e+06	4.25544e+06	4.69104e+06	5.58651e+06	2.79334e+06	5.32015e+06	3.20489e+06	5.26045e+06	3.30043e+06	2.05114e+06	3.34485e+06	2.66611e+06	3.91091e+06	2.50849e+06	3.77947e+06	4.67955e+06	3.34383e+06	3.20763e+06	4.382e+06	7.56398e+06	4.22227e+06	2.21638e+06	2.27637e+06	5.45779e+06	3.70266e+06	3.54841e+06	7.08764e+06	3.68567e+06	3.5421e+06	1.87729e+06	5.09411e+06	4.09137e+06	4.44811e+06	2.51585e+06	1.40768e+06	2.01154e+06	2.19654e+06	3.24099e+06
Com_41_neg	8Z,11Z,14Z-Eicosatrienoic acid	C20 H34 O2	306.256	14.282	305.249	Full match	No results	Full match	1.24706e+09	1.06012e+09	1.18652e+09	9.02639e+08	1.09555e+09	7.53397e+08	9.42612e+08	1.31392e+09	8.09683e+08	9.05611e+08	1.34878e+09	6.36247e+08	8.14102e+08	6.80942e+08	1.72045e+09	6.27265e+08	1.0421e+09	1.22043e+09	7.84244e+08	1.08285e+09	6.90023e+08	1.22417e+09	3.4571e+09	9.7516e+08	9.33291e+08	1.37512e+09	9.18286e+08	9.86676e+08	4.69447e+08	7.42563e+08	1.03194e+09	1.34442e+09	7.49846e+08	7.92739e+08	6.8614e+08	7.21175e+08	8.11096e+08	1.25743e+09	1.02727e+09	5.2697e+08	1.14035e+09
Com_4210_neg	PE (16:1e/18:1)	C39 H76 N O7 P	701.537	15.215	700.53	No results	Full match	No results	4.17885e+06	8.61219e+06	5.29308e+06	6.54291e+06	7.47598e+06	5.92542e+06	1.03908e+07	7.51049e+06	9.23817e+06	6.82185e+06	6.86916e+06	1.03819e+07	6.80605e+06	3.06219e+06	6.88458e+06	8.89391e+06	6.69349e+06	5.13384e+06	6.83427e+06	6.04478e+06	8.57676e+06	8.7578e+06	6.47577e+06	1.13982e+07	1.58292e+07	9.44357e+06	1.35175e+07	8.8225e+06	8.46087e+06	7.75221e+06	1.23559e+07	7.44713e+06	7.88752e+06	1.03684e+07	1.22078e+07	7.97087e+06	4.66703e+06	1.07155e+07	4.35783e+06	1.15006e+07	5.27313e+06
Com_422_neg	13(S)-HOTrE	C18 H30 O3	294.22	12.825	293.213	Full match	No results	Full match	4.40218e+06	5.02814e+06	5.47877e+06	6.50247e+06	5.24015e+06	5.15575e+06	7.66001e+06	4.9799e+06	5.49626e+06	5.08778e+06	6.13304e+06	6.87089e+06	4.97267e+06	5.07777e+06	6.44628e+06	6.50468e+06	4.64123e+06	5.96546e+06	6.05313e+06	6.07357e+06	5.29136e+06	6.98888e+06	2.15016e+08	5.74825e+06	7.0229e+06	5.52318e+06	4.30572e+06	4.9349e+06	6.22145e+06	4.91288e+06	4.40449e+06	5.01597e+06	5.19128e+06	5.2364e+06	4.81156e+06	5.92179e+06	5.50671e+06	6.0982e+06	4.90588e+06	7.9982e+06	6.5658e+06
Com_4303_neg	2,3-dinor Prostaglandin E1	C18 H30 O5	308.199	11.618	307.192	Invalid mass	No results	No results	2.62275e+06	4.47843e+06	5.40457e+06	6.01319e+06	3.8795e+06	2.86615e+06	5.1598e+06	4.04902e+06	4.62699e+06	3.57475e+06	3.77275e+06	6.15911e+06	5.26087e+06	1.19344e+07	3.14304e+06	5.9934e+06	3.95189e+06	2.5009e+06	6.53158e+06	2.65565e+06	7.23917e+06	7.5989e+06	2.80611e+06	5.17262e+06	5.98253e+06	9.24125e+06	5.51263e+06	4.09496e+06	4.56139e+06	9.45425e+06	4.09118e+06	5.28633e+06	3.50526e+06	4.27006e+06	4.23481e+06	7.45146e+06	5.93194e+06	3.23648e+06	6.57462e+06	4.04295e+06	3.35922e+06
Com_4318_neg	Dl-3,4-Dihydroxymandelic Acid	C8 H8 O5	184.038	2.928	183.03	No results	No results	Full match	2.32301e+06	4.89525e+06	8.0106e+06	6.40417e+06	3.79822e+06	3.4818e+06	3.14022e+06	3.72433e+06	4.72552e+06	1.02169e+07	3.44275e+06	8.14387e+06	2.12037e+06	2.11218e+06	4.26808e+06	1.16837e+07	1.22892e+07	3.02821e+06	1.57725e+07	4.96469e+06	6.17646e+06	3.2504e+06	4.89728e+06	5.70043e+06	5.1387e+06	2.69679e+06	4.42518e+06	8.58844e+06	7.35383e+06	1.90812e+06	1.13854e+07	4.53435e+06	5.12425e+06	5.81538e+06	5.09258e+06	7.07172e+06	2.00759e+06	2.67325e+06	5.59696e+06	3.14097e+06	4.95458e+06
Com_433_neg	PC (16:0/20:3)	C44 H82 N O8 P	843.6	16.339	842.593	No results	Invalid mass	No results	2.34482e+08	8.60507e+07	1.01164e+08	1.96773e+08	1.76013e+08	1.22815e+08	2.66604e+08	1.80274e+08	1.27053e+08	2.08762e+08	1.15137e+08	1.77342e+08	1.03978e+08	9.87448e+07	1.73176e+08	1.10035e+08	2.04674e+08	1.04933e+08	2.4032e+08	1.28342e+08	2.38949e+08	1.28176e+08	5.01259e+07	3.0845e+08	1.21198e+08	1.92868e+08	8.02387e+07	8.7868e+07	1.2809e+08	2.33523e+07	1.21349e+08	1.39538e+08	1.40165e+08	1.91487e+08	1.12768e+08	1.52041e+08	5.85457e+07	8.65394e+07	5.69748e+07	2.21079e+08	2.00609e+08
[truncated: 203 more rows]
[truncated: 20 more columns]
